# Supplementary material for: Molecular Responses of The Eukaryotic Cell Line INT407 on the Internalised <em>C. jejuni</em> - the other Side of the Coin
Source: Preprints.org preprint supplement (doi:10.20944/preprints202311.1510.v1), 2023-11-23
Supplement: Supplementary file 2 [file supplementary]

## Sheet: 1 vs. 3
Feature ID	Experiment - Range (original values)	Experiment - IQR (original values)	Experiment - Difference (original values)	Experiment - Fold Change (original values)	Experiment - Range (normalized values)	Experiment - IQR (normalized values)	Experiment - Difference (normalized values)	Experiment - Fold Change (normalized values)	Kal's Z-test:3 vs 1 normalized values - Proportions difference	Kal's Z-test:3 vs 1 normalized values - Proportions fold change	Kal's Z-test:3 vs 1 normalized values - Test statistic	Kal's Z-test:3 vs 1 normalized values - P-value	Kal's Z-test:3 vs 1 normalized values - FDR p-value correction	Kal's Z-test:3 vs 1 normalized values - Bonferroni	Baggerley's test: 3 vs 1 normalized values - Weighted proportions difference	Baggerley's test: 3 vs 1 normalized values - Weighted proportions fold change	Baggerley's test: 3 vs 1 normalized values - Test statistic	Baggerley's test: 3 vs 1 normalized values - P-value	Baggerley's test: 3 vs 1 normalized values - FDR p-value correction	Baggerley's test: 3 vs 1 normalized values - Bonferroni	Annotations - Database	Annotations - Database identifier	Annotations - Database symbol	Annotations - Qualifier	Annotations - GO biological process	Annotations - GO cellular component	Annotations - GO molecular function	Annotations - Database object name	Annotations - Synonym	Annotations - Database object type	Annotations - Taxon ID	Annotations - Date	Annotations - Assigned by	Annotations - Annotation extension	Annotations - Gene product form ID	1 - 5500xl_2013_01_28_1_03_1_F3.QV trimmed RNA-Seq - Expression values	1 - 5500xl_2013_01_28_1_03_1_F3.QV trimmed RNA-Seq - Normalized expression values	1 - 5500xl_2013_01_28_1_03_1_F3.QV trimmed RNA-Seq - Transcripts annotated	1 - 5500xl_2013_01_28_1_03_1_F3.QV trimmed RNA-Seq - Detected transcripts	1 - 5500xl_2013_01_28_1_03_1_F3.QV trimmed RNA-Seq - Exon length	1 - 5500xl_2013_01_28_1_03_1_F3.QV trimmed RNA-Seq - Unique gene reads	1 - 5500xl_2013_01_28_1_03_1_F3.QV trimmed RNA-Seq - Total gene reads	1 - 5500xl_2013_01_28_1_03_1_F3.QV trimmed RNA-Seq - Unique exon reads	1 - 5500xl_2013_01_28_1_03_1_F3.QV trimmed RNA-Seq - Total exon reads	1 - 5500xl_2013_01_28_1_03_1_F3.QV trimmed RNA-Seq - Ratio of unique to total (exon reads)	1 - 5500xl_2013_01_28_1_03_1_F3.QV trimmed RNA-Seq - Unique exon-exon reads	1 - 5500xl_2013_01_28_1_03_1_F3.QV trimmed RNA-Seq - Total exon-exon reads	1 - 5500xl_2013_01_28_1_03_1_F3.QV trimmed RNA-Seq - Unique intron-exon reads	1 - 5500xl_2013_01_28_1_03_1_F3.QV trimmed RNA-Seq - Total intron-exon reads
VNN1	33.3009	33.3009	33.3009	254.033	361.836	361.836	361.836	379.087	0.000361836	379.087	18.9736	0	0	0	0.000361836	379.087	18.9753	0	0	0	UniProtKB	O95497	VNN1		0006954 // inflammatory response (PMID:15282320 [ISS] UniProtKB:Q9Z0K8) /// 0043066 // negative regulation of apoptosis (PMID:15282320 [ISS] UniProtKB:Q9Z0K8) /// 0016337 // cell-cell adhesion (PMID:11491533 [ISS] UniProtKB:Q9Z0K8) /// 0015939 // pantothenate metabolic process (PMID:11491533 [IDA]) /// 0006928 // cell motion (PMID:9790769 [TAS]) /// 0033089 // positive regulation of T cell differ…	0016021 // integral to membrane (PMID:17145956 [TAS]) /// 0005886 // plasma membrane (GO_REF:0000039 [IEA] UniProtKB-SubCell:SL-0039) /// 0031225 // anchored to membrane (GO_REF:0000037 [IEA] UniProtKB-KW:KW-0336)	0034235 // GPI anchor binding (PMID:17145956 [TAS]) /// 0017159 // pantetheine hydrolase activity (PMID:11491533 [IDA])	Pantetheinase	VNN1_HUMAN|VNN1	protein	taxon:9606	20080506	BHF-UCL			0.131607	0.957017	1	1	3844	25	30	5	5	1	0	0	0	0
ZNF853	16.309	16.309	16.309	116.347	177.484	177.484	177.484	173.622	0.000177484	173.622	13.2464	0	0	0	0.000177484	173.622	13.247	0	0	0	UniProtKB	P0CG23	ZNF853			0005622 // intracellular (GO_REF:0000002 [IEA] InterPro:IPR015880)	0046872 // metal ion binding (GO_REF:0000037 [IEA] UniProtKB-KW:KW-0479) /// 0003676 // nucleic acid binding (GO_REF:0000002 [IEA] InterPro:IPR013087) /// 0008270 // zinc ion binding (GO_REF:0000002 [IEA] InterPro:IPR007087|InterPro:IPR015880)	Zinc finger protein 853	ZN853_HUMAN|ZNF853	protein	taxon:9606	20130119	InterPro			0.141391	1.02817	1	1	3578	11	11	5	5	1	0	0	0	0
HRASLS5	0.628029	0.628029	0.628029	20.3226	6.93141	6.93141	6.93141	30.327	6.93141e-06	30.327	2.54733	0.0108549	0.342401	1	6.93141e-06	30.327	2.54734	0.0108549	0.342401	1	UniProtKB	Q96KN8	HRASLS5				0016746 // transferase activity, transferring acyl groups (GO_REF:0000037 [IEA] UniProtKB-KW:KW-0012)	Ca(2+)-independent N-acyltransferase	HRSL5_HUMAN|HRASLS5|HRLP5	protein	taxon:9606	20130119	UniProtKB			0.0325022	0.236349	3	0	3113	19	20	1	1	1	0	0	0	0
ST20-MTHFS	1.55648	1.55648	1.55648	12.7016	17.3664	17.3664	17.3664	18.9544	1.73664e-05	18.9544	3.95296	7.71895e-05	0.00769961	1	1.73664e-05	18.9544	3.95298	7.71893e-05	0.00769959	1																0.133014	0.96725	1	1	2282	0	44	0	3	0	0	0	0	0
AMY1B	0.597546	0.597546	0.597546	11.8549	6.68134	6.68134	6.68134	17.6907	6.68134e-06	17.6907	2.44263	0.0145808	0.413998	1	6.68134e-06	17.6907	2.44263	0.0145808	0.413998	1	UniProtKB	Q5T085, Q5T084	AMY1B		0005975 // carbohydrate metabolic process (GO_REF:0000002 [IEA] InterPro:IPR013781) /// 0005975 // carbohydrate metabolic process (GO_REF:0000002 [IEA] InterPro:IPR006046|InterPro:IPR006047|InterPro:IPR013781)		0043169 // cation binding (GO_REF:0000002 [IEA] InterPro:IPR013781) /// 0043169 // cation binding (GO_REF:0000002 [IEA] InterPro:IPR006046|InterPro:IPR006047|InterPro:IPR013781) /// 0003824 // catalytic activity (GO_REF:0000002 [IEA] InterPro:IPR006046|InterPro:IPR006047|InterPro:IPR013781|InterPro:IPR015902) /// 0003824 // catalytic activity (GO_REF:0000002 [IEA] InterPro:IPR013781|InterPro:IPR0…	Amylase, alpha 1B (Salivary)	Q5T084_HUMAN|RP11-508C1.1-003|AMY1A|AMY1B	protein	taxon:9606	20130119	InterPro			0.0550486	0.400302	1	0	1838	0	1	0	1	0	0	0	0	1
SDR9C7	0.62226	0.62226	0.62226	11.8549	6.95768	6.95768	6.95768	17.6907	6.95768e-06	17.6907	2.49263	0.0126801	0.380997	1	6.95768e-06	17.6907	2.49263	0.0126802	0.380997	1	UniProtKB	Q8NEX9	SDR9C7		0055114 // oxidation reduction (PMID:19703561 [IDA])	0005737 // cytoplasm (PMID:18029348 [IDA]) /// 0005730 // nucleolus (PMID:18029348 [IDA])	0004745 // retinol dehydrogenase activity (PMID:19703561 [IDA]) /// 0000166 // nucleotide binding (GO_REF:0000002 [IEA] InterPro:IPR016040)	Short-chain dehydrogenase/reductase family 9C member 7	DR9C7_HUMAN|RDHS|SDR9C7|SDRO	protein	taxon:9606	20130119	InterPro			0.0573254	0.416858	1	1	1765	6	6	1	1	1	0	0	0	0
PRPF31 (NW_003571055 89902..106263)	0.809985	0.809985	0.809985	9.73793	9.1214	9.1214	9.1214	14.5317	9.1214e-06	14.5317	2.81902	0.00481702	0.19174	1	9.1214e-06	14.5317	2.81903	0.00481702	0.19174	1																0.0926976	0.674077	1	1	2183	0	3	0	2	0	0	0	0	0
ZAN	0.0963312	0.0963312	0.0963312	9.31454	1.08681	1.08681	1.08681	13.8999	1.08681e-06	13.8999	0.970017	0.332038	1	1	1.08681e-06	13.8999	0.970017	0.332038	1	1	UniProtKB	Q9Y493, F5H0T8, F5GZI5, F5H4B5	ZAN		0007339 // binding of sperm to zona pellucida (PMID:9126492 [NAS]) /// 0016337 // cell-cell adhesion (PMID:9126492 [NAS])	0016020 // membrane (GO_REF:0000002 [IEA] InterPro:IPR000998) /// 0016021 // integral to membrane (GO_REF:0000037 [IEA] UniProtKB-KW:KW-0812) /// 0005886 // plasma membrane (PMID:9126492 [NAS])		Zonadhesin	F5GZI5_HUMAN|ZAN	protein	taxon:9606	20130119	InterPro			0.0115859	0.08425	2	0	8733	71	76	1	1	1	0	0	0	0
ABCD2	0.15751	0.15751	0.15751	9.31454	1.77704	1.77704	1.77704	13.8999	1.77704e-06	13.8999	1.24037	0.21484	1	1	1.77704e-06	13.8999	1.24037	0.21484	1	1	UniProtKB	Q9UBJ2	ABCD2		0055085 // transmembrane transport (Reactome:REACT_15518 [TAS]) /// 0006635 // fatty acid beta-oxidation (PMID:21145416 [IGI] UniProtKB:P41909) /// 0000038 // very-long-chain fatty acid metabolic process (PMID:10196381 [IDA]) /// 0055085 // transmembrane transport (Reactome:REACT_15480 [TAS]) /// 0042760 // very-long-chain fatty acid catabolic process (PMID:21145416 [IGI] UniProtKB:P41909) /// 00…	0005777 // peroxisome (PMID:10329405 [IDA]) /// 0016021 // integral to membrane (GO_REF:0000037 [IEA] UniProtKB-KW:KW-0812) /// 0005777 // peroxisome (PMID:10196381 [IDA]) /// 0005829 // cytosol (Reactome:REACT_15396 [TAS]) /// 0005778 // peroxisomal membrane (Reactome:REACT_15322 [TAS]) /// 0005778 // peroxisomal membrane (Reactome:REACT_15396 [TAS]) /// 0005777 // peroxisome (PMID:21145416 [IDA…	0005515 // protein binding (PMID:11883941 [IPI] UniProtKB:P40855-1) /// 0005524 // ATP binding (GO_REF:0000037 [IEA] UniProtKB-KW:KW-0067) /// 0042803 // protein homodimerization activity (PMID:21145416 [IDA]) /// 0005515 // protein binding (PMID:10704444 [IPI] UniProtKB:P40855) /// 0005515 // protein binding (PMID:10777694 [IPI] UniProtKB:P40855) /// 0016887 // ATPase activity (GO_REF:0000002 [I…	ATP-binding cassette sub-family D member 2	ABCD2_HUMAN|ALD1|ABCD2|ALDL1|ALDR|ALDRP	protein	taxon:9606	20120213	UniProtKB	has_direct_input(CHEBI:28866)		0.0189439	0.137756	1	1	5341	28	30	1	1	1	0	0	0	0
SERPINB9	0.161385	0.161385	0.161385	7.62099	1.83852	1.83852	1.83852	11.3726	1.83852e-06	11.3726	1.2415	0.21442	1	1	1.83852e-06	11.3726	1.2415	0.21442	1	1	UniProtKB	P50453	SERPINB9		0071391 /// 0043066 // negative regulation of apoptosis (PMID:17479112 [IMP]) /// 0006955 // immune response (PMID:16306080 [IDA]) /// 0010951 // negative regulation of endopeptidase activity (GO_REF:0000033 [IBA] PANTHER:PTN000156122) /// 0030162 // regulation of proteolysis (GO_REF:0000033 [IBA] PANTHER:PTN000156122) /// 0002448 // mast cell mediated immunity (PMID:15739160 [IEP]) /// 0043066 /…	0005737 // cytoplasm (PMID:15739160 [IDA]) /// 0005737 // cytoplasm (PMID:11463822 [IDA]) /// 0005634 // nucleus (PMID:11485349 [IDA]) /// 0005615 // extracellular space (PMID:16267761 [IDA]) /// 0005829 // cytosol (PMID:11485349 [IDA]) /// 0005634 // nucleus (PMID:11463822 [IDA])	0005515 // protein binding (PMID:17479112 [IPI] UniProtKB:Q14790) /// 0005515 // protein binding (PMID:17479112 [IPI] UniProtKB:Q92851) /// 0004867 // serine-type endopeptidase inhibitor activity (PMID:8910377 [IDA]) /// 0002020 // protease binding (PMID:16267761 [IPI] UniProtKB:P10144) /// 0043027 // caspase inhibitor activity (PMID:17479112 [IMP]) /// 0004867 // serine-type endopeptidase inhibi…	Serpin B9	SPB9_HUMAN|SERPINB9|PI9	protein	taxon:9606	20100312	UniProtKB			0.0243747	0.177248	1	1	4151	16	16	1	1	1	0	0	0	0
TRPM6	0.0776075	0.0776075	0.0776075	7.62099	0.884118	0.884118	0.884118	11.3726	8.84118e-07	11.3726	0.860932	0.389276	1	1	8.84118e-07	11.3726	0.860932	0.389276	1	1	UniProtKB	F8WAD9, Q5VYG5, Q9BX84, G8JLG6, G8JLG7, F8W9E6	TRPM6		0009636 // response to toxin (PMID:17575980 [IDA])	0016324 // apical plasma membrane (GO_REF:0000019 [IEA] Ensembl:ENSMUSP00000037443) /// 0031526 // brush border membrane (GO_REF:0000019 [IEA] Ensembl:ENSMUSP00000037443) /// 0016021 // integral to membrane (GO_REF:0000037 [IEA] UniProtKB-KW:KW-0812) /// 0016021 // integral to membrane (GO_REF:0000038 [IEA] UniProtKB-KW:KW-0812)	0004674 // protein serine/threonine kinase activity (GO_REF:0000002 [IEA] InterPro:IPR004166) /// 0005524 // ATP binding (GO_REF:0000002 [IEA] InterPro:IPR004166) /// 0005216 // ion channel activity (GO_REF:0000038 [IEA] UniProtKB-KW:KW-0407) /// 0005524 // ATP binding (GO_REF:0000037 [IEA] UniProtKB-KW:KW-0067) /// 0046872 // metal ion binding (GO_REF:0000037 [IEA] UniProtKB-KW:KW-0479) /// 0005…	Transient receptor potential cation channel subfamily M member 6	F8W9E6_HUMAN|TRPM6	protein	taxon:9606	20130119	InterPro			0.0117214	0.0852358	3	0	8632	236	264	1	1	1	0	0	0	0
ZSCAN16	0.525006	0.525006	0.525006	7.62099	5.98096	5.98096	5.98096	11.3726	5.98096e-06	11.3726	2.23924	0.0251406	0.586684	1	5.98096e-06	11.3726	2.23924	0.0251406	0.586684	1	UniProtKB	Q9H4T2	ZSCAN16		0006351 // transcription, DNA-dependent (GO_REF:0000037 [IEA] UniProtKB-KW:KW-0804) /// 0016032 // viral reproduction (GO_REF:0000002 [IEA] InterPro:IPR008916)	0005634 // nucleus (PMID:18029348 [IDA])	0046872 // metal ion binding (GO_REF:0000037 [IEA] UniProtKB-KW:KW-0479) /// 0003677 // DNA binding (GO_REF:0000037 [IEA] UniProtKB-KW:KW-0238) /// 0008270 // zinc ion binding (GO_REF:0000002 [IEA] InterPro:IPR007087|InterPro:IPR015880) /// 0003700 // transcription factor activity (GO_REF:0000002 [IEA] InterPro:IPR003309)	Zinc finger and SCAN domain-containing protein 16	ZSC16_HUMAN|ZNF392|ZSCAN16|ZNF435	protein	taxon:9606	20130119	InterPro			0.0792942	0.576611	1	1	1276	0	8	0	1	0	0	0	0	0
PRR4 (NW_003571047 44554..48182)	1.18778	1.18778	1.18778	7.62099	13.5314	13.5314	13.5314	11.3726	1.35314e-05	11.3726	3.36811	0.000756849	0.0496145	1	1.35314e-05	11.3726	3.36812	0.000756847	0.0496138	1																0.179396	1.30453	2	0	564	0	4	0	1	0	0	0	0	0
TMC1	0.209281	0.209281	0.209281	7.62099	2.38416	2.38416	2.38416	11.3726	2.38416e-06	11.3726	1.41378	0.157427	1	1	2.38416e-06	11.3726	1.41378	0.157427	1	1	UniProtKB	Q8TDI8	TMC1		0007605 // sensory perception of sound (GO_REF:0000037 [IEA] UniProtKB-KW:KW-1009)	0016021 // integral to membrane (GO_REF:0000037 [IEA] UniProtKB-KW:KW-0812)		Transmembrane channel-like protein 1	TMC1_HUMAN|TMC1	protein	taxon:9606	20130119	UniProtKB			0.0316087	0.229852	1	0	3201	207	246	1	1	1	0	0	1	1
ABCA6	0.110316	0.110316	0.110316	6.77421	1.26548	1.26548	1.26548	10.109	1.26548e-06	10.109	1.01865	0.308368	1	1	1.26548e-06	10.109	1.01865	0.308368	1	1	UniProtKB	Q8N139	ABCA6		0006810 // transport (GO_REF:0000037 [IEA] UniProtKB-KW:KW-0813)	0016021 // integral to membrane (GO_REF:0000037 [IEA] UniProtKB-KW:KW-0812)	0005524 // ATP binding (GO_REF:0000037 [IEA] UniProtKB-KW:KW-0067) /// 0016887 // ATPase activity (GO_REF:0000002 [IEA] InterPro:IPR003439)	ATP-binding cassette sub-family A member 6	ABCA6_HUMAN|ABCA6	protein	taxon:9606	20130119	UniProtKB			0.0191049	0.138927	1	1	5296	30	30	1	1	1	0	0	0	0
OLR1	0.232206	0.232206	0.232206	6.77421	2.66375	2.66375	2.66375	10.109	2.66375e-06	10.109	1.4779	0.139435	1	1	2.66375e-06	10.109	1.4779	0.139435	1	1	UniProtKB	J3QTI8, F5H7N8, F5H3G7, F5H0N6, P78380, F5H001	OLR1		0008015 // blood circulation (PMID:9052782 [TAS]) /// 0042157 // lipoprotein metabolic process (GO_REF:0000019 [IEA] Ensembl:ENSRNOP00000011196) /// 0050900 // leukocyte migration (Reactome:REACT_12051 [TAS]) /// 0042542 // response to hydrogen peroxide (GO_REF:0000019 [IEA] Ensembl:ENSRNOP00000011196) /// 0006508 // proteolysis (PMID:9052782 [TAS]) /// 0007159 // leukocyte adhesion (GO_REF:00000…	0005887 // integral to plasma membrane (PMID:9052782 [TAS]) /// 0016020 // membrane (PMID:9052782 [TAS]) /// 0005886 // plasma membrane (Reactome:REACT_12039 [TAS]) /// 0005576 // extracellular region (GO_REF:0000039 [IEA] UniProtKB-SubCell:SL-0243)	0005041 // low-density lipoprotein receptor activity (GO_REF:0000019 [IEA] Ensembl:ENSMUSP00000032265) /// 0030246 // carbohydrate binding (GO_REF:0000002 [IEA] InterPro:IPR001304)	Oxidized low-density lipoprotein receptor 1, soluble form	F5H001_HUMAN|OLR1	protein	taxon:9606	20130119	ENSEMBL			0.0402144	0.29243	3	0	2516	22	22	1	1	1	0	0	0	0
ACVR1C	0.0643639	0.0643639	0.0643639	6.77421	0.738349	0.738349	0.738349	10.109	7.38349e-07	10.109	0.778088	0.436517	1	1	7.38349e-07	10.109	0.778088	0.436517	1	1	UniProtKB	Q8NER5	ACVR1C		0019915 // lipid storage (GO_REF:0000019 [IEA] Ensembl:ENSMUSP00000028178) /// 0009749 // response to glucose stimulus (GO_REF:0000019 [IEA] Ensembl:ENSMUSP00000028178) /// 0006468 // protein amino acid phosphorylation (PMID:12063393 [IC] GO:0016361) /// 0032868 // response to insulin stimulus (GO_REF:0000019 [IEA] Ensembl:ENSMUSP00000028178) /// 0043280 // positive regulation of caspase activity…	0048179 // activin receptor complex (PMID:15531507 [IDA])	0038100 /// 0005524 // ATP binding (GO_REF:0000037 [IEA] UniProtKB-KW:KW-0067) /// 0005024 // transforming growth factor beta receptor activity (GO_REF:0000002 [IEA] InterPro:IPR000472) /// 0046872 // metal ion binding (PMID:12063393 [IC] GO:0016361) /// 0016361 // activin receptor activity, type I (PMID:12063393 [IDA])	Activin receptor type-1C	ACV1C_HUMAN|ALK7|ACVR1C	protein	taxon:9606	20130119	ENSEMBL			0.0111468	0.0810571	4	0	9077	51	55	0	1	0	0	0	0	0
C12orf55	0.156799	0.156799	0.156799	6.77421	1.79871	1.79871	1.79871	10.109	1.79871e-06	10.109	1.21445	0.224577	1	1	1.79871e-06	10.109	1.21445	0.224577	1	1																0.027155	0.197465	1	1	3726	105	117	1	1	1	0	0	0	0
ULBP3	0.794873	0.794873	0.794873	6.77421	9.11836	9.11836	9.11836	10.109	9.11836e-06	10.109	2.73437	0.00624997	0.231371	1	9.11836e-06	10.109	2.73438	0.00624997	0.231371	1	UniProtKB	Q9BZM4	ULBP3		0050776 // regulation of immune response (Reactome:REACT_11152 [TAS]) /// 0030101 // natural killer cell activation (PMID:11239445 [NAS]) /// 0006955 // immune response (GO_REF:0000002 [IEA] InterPro:IPR001039|InterPro:IPR011161) /// 0019048 // virus-host interaction (GO_REF:0000037 [IEA] UniProtKB-KW:KW-0945) /// 0019882 // antigen processing and presentation (GO_REF:0000002 [IEA] InterPro:IPR00…	0005886 // plasma membrane (Reactome:REACT_11178 [TAS]) /// 0042612 // MHC class I protein complex (GO_REF:0000002 [IEA] InterPro:IPR001039) /// 0031225 // anchored to membrane (GO_REF:0000037 [IEA] UniProtKB-KW:KW-0336) /// 0016020 // membrane (GO_REF:0000029 [NAS])	0032393 // MHC class I receptor activity (PMID:11239445 [NAS])	NKG2D ligand 3	N2DL3_HUMAN|ULBP3|N2DL3|RAET1N	protein	taxon:9606	20070516	Reactome			0.137659	1.00103	1	1	735	8	8	1	1	1	0	0	0	0
ZNF558 (NW_003871094 239675..243201)	0.22947	0.22947	0.22947	6.77421	2.63236	2.63236	2.63236	10.109	2.63236e-06	10.109	1.46917	0.141788	1	1	2.63236e-06	10.109	1.46917	0.141788	1	1																0.0397405	0.288985	1	1	2546	0	2	0	1	0	0	0	0	0
ZNF93	0.209102	0.209102	0.209102	6.77421	2.39871	2.39871	2.39871	10.109	2.39871e-06	10.109	1.40245	0.160781	1	1	2.39871e-06	10.109	1.40245	0.160781	1	1	UniProtKB	K7ES58, K7EQ36, P35789, K7EPG7, K7EPV7	ZNF93		0006355 // regulation of transcription, DNA-dependent (GO_REF:0000002 [IEA] InterPro:IPR001909) /// 0006351 // transcription, DNA-dependent (GO_REF:0000037 [IEA] UniProtKB-KW:KW-0804) /// 0006355 // regulation of transcription, DNA-dependent (GO_REF:0000029 [NAS])	0005634 // nucleus (GO_REF:0000029 [NAS]) /// 0005622 // intracellular (GO_REF:0000002 [IEA] InterPro:IPR001909)	0003676 // nucleic acid binding (GO_REF:0000002 [IEA] InterPro:IPR001909) /// 0046872 // metal ion binding (GO_REF:0000037 [IEA] UniProtKB-KW:KW-0479) /// 0003677 // DNA binding (GO_REF:0000037 [IEA] UniProtKB-KW:KW-0238) /// 0003676 // nucleic acid binding (GO_REF:0000002 [IEA] InterPro:IPR013087) /// 0008270 // zinc ion binding (GO_REF:0000002 [IEA] InterPro:IPR007087) /// 0008270 // zinc ion b…	Zinc finger protein 93 (HTF34), isoform CRA_a	K7EPG7_HUMAN|ZNF93|hCG_1775441	protein	taxon:9606	20130119	InterPro			0.0362131	0.263334	1	1	2794	26	30	1	1	1	0	0	0	0
EN1	0.197242	0.197242	0.197242	6.77421	2.26266	2.26266	2.26266	10.109	2.26266e-06	10.109	1.3621	0.173168	1	1	2.26266e-06	10.109	1.3621	0.173168	1	1	UniProtKB	Q05925	EN1		0009653 // anatomical structure morphogenesis (PMID:8094370 [TAS]) /// 0030917 // midbrain-hindbrain boundary development (GO_REF:0000019 [IEA] Ensembl:ENSMUSP00000078659) /// 0045944 // positive regulation of transcription from RNA polymerase II promoter (GO_REF:0000019 [IEA] Ensembl:ENSMUSP00000078659) /// 0043473 // pigmentation (GO_REF:0000019 [IEA] Ensembl:ENSMUSP00000078659) /// 0001501 // …	0005634 // nucleus (GO_REF:0000039 [IEA] UniProtKB-SubCell:SL-0191)	0043565 // sequence-specific DNA binding (GO_REF:0000002 [IEA] InterPro:IPR001356|InterPro:IPR017970) /// 0003700 // transcription factor activity (GO_REF:0000002 [IEA] InterPro:IPR001356)	Homeobox protein engrailed-1	HME1_HUMAN|EN1	protein	taxon:9606	20030904	PINC			0.0341592	0.248398	1	1	2962	1	1	1	1	1	0	0	0	0
NDUFA3 (NW_003571054 77272..81394)	1.65037	1.65037	1.65037	6.77421	18.9322	18.9322	18.9322	10.109	1.89322e-05	10.109	3.94004	8.14679e-05	0.00803055	1	1.89322e-05	10.109	3.94006	8.14674e-05	0.00803049	1																0.285818	2.0784	1	1	354	1	1	1	1	1	1	1	0	0
SLC51A	0.401534	0.401534	0.401534	6.77421	4.60618	4.60618	4.60618	10.109	4.60618e-06	10.109	1.94343	0.0519642	0.917164	1	4.60618e-06	10.109	1.94343	0.0519642	0.917165	1	UniProtKB	Q86UW1	SLC51A		0006810 // transport (PMID:16317684 [IEP]) /// 0015721 // bile acid and bile salt transport (GO_REF:0000024 [ISS] UniProtKB:Q8R000)	0043234 // protein complex (GO_REF:0000024 [ISS] UniProtKB:Q8R000) /// 0005789 // endoplasmic reticulum membrane (GO_REF:0000024 [ISS] UniProtKB:Q8R000) /// 0016021 // integral to membrane (GO_REF:0000024 [ISS] UniProtKB:Q8R000) /// 0005886 // plasma membrane (PMID:12719432 [IDA])	0042803 // protein homodimerization activity (GO_REF:0000024 [ISS] UniProtKB:Q8R000) /// 0046982 // protein heterodimerization activity (GO_REF:0000024 [ISS] UniProtKB:Q8R000) /// 0005215 // transporter activity (PMID:16317684 [IDA])	Organic solute transporter subunit alpha	OSTA_HUMAN|OSTA|SLC51A	protein	taxon:9606	20080626	UniProtKB			0.0695391	0.505674	1	0	1455	19	19	1	1	1	0	0	1	1
USP50	0.419706	0.419706	0.419706	6.77421	4.81465	4.81465	4.81465	10.109	4.81465e-06	10.109	1.98692	0.0469311	0.864852	1	4.81465e-06	10.109	1.98692	0.0469311	0.864852	1	UniProtKB	E9PP86, Q70EL3	USP50		0006511 // ubiquitin-dependent protein catabolic process (GO_REF:0000002 [IEA] InterPro:IPR001394|InterPro:IPR018200)		0004221 // ubiquitin thiolesterase activity (GO_REF:0000002 [IEA] InterPro:IPR001394|InterPro:IPR018200)	Inactive ubiquitin carboxyl-terminal hydrolase 50	E9PP86_HUMAN|USP50	protein	taxon:9606	20130119	InterPro			0.0726864	0.52856	1	0	1392	73	83	0	1	0	0	0	0	1
ILDR1	0.17263	0.17263	0.17263	5.92744	1.99871	1.99871	1.99871	8.84537	1.99871e-06	8.84537	1.26202	0.206942	1	1	1.99871e-06	8.84537	1.26202	0.206942	1	1	UniProtKB	Q86SU0	ILDR1			0005886 // plasma membrane (GO_REF:0000039 [IEA] UniProtKB-SubCell:SL-0039) /// 0016021 // integral to membrane (GO_REF:0000037 [IEA] UniProtKB-KW:KW-0812) /// 0005829 // cytosol (GO_REF:0000039 [IEA] UniProtKB-SubCell:SL-0091)		Immunoglobulin-like domain-containing receptor 1	ILDR1_HUMAN|ILDR1	protein	taxon:9606	20130119	UniProtKB			0.0350344	0.254763	3	0	2888	33	33	1	1	1	0	0	0	0
LRRC69	0.376837	0.376837	0.376837	5.92744	4.36302	4.36302	4.36302	8.84537	4.36302e-06	8.84537	1.8646	0.062238	1	1	4.36302e-06	8.84537	1.8646	0.062238	1	1																0.0764773	0.556126	1	1	1323	146	180	1	1	1	1	1	0	0
ASZ1	0.267322	0.267322	0.267322	5.92744	3.09505	3.09505	3.09505	8.84537	3.09505e-06	8.84537	1.57045	0.11631	1	1	3.09505e-06	8.84537	1.57045	0.11631	1	1	UniProtKB	Q8WWH4, C9JP59	ASZ1		0031047 // gene silencing by RNA (GO_REF:0000037 [IEA] UniProtKB-KW:KW-0943) /// 0030154 // cell differentiation (GO_REF:0000037 [IEA] UniProtKB-KW:KW-0221) /// 0043046 // DNA methylation during gametogenesis (GO_REF:0000024 [ISS] UniProtKB:Q8VD46) /// 0007283 // spermatogenesis (GO_REF:0000024 [ISS] UniProtKB:Q8VD46) /// 0007275 // multicellular organismal development (GO_REF:0000037 [IEA] UniPr…	0005737 // cytoplasm (GO_REF:0000024 [ISS] UniProtKB:Q8VD46) /// 0071546	0004871 // signal transducer activity (PMID:12040005 [NAS])	Ankyrin repeat, SAM and basic leucine zipper domain-containing protein 1	C9JP59_HUMAN|ASZ1	protein	taxon:9606	20130119	ENSEMBL			0.0542517	0.394507	1	0	1865	36	36	1	1	1	0	0	1	1
CHAC1	4.47421	4.47421	4.47421	5.92744	51.8024	51.8024	51.8024	8.84537	5.18024e-05	8.84537	6.425	1.31872e-10	3.85427e-08	5.5116e-06	5.18024e-05	8.84537	6.42506	1.31863e-10	3.85399e-08	5.51121e-06	UniProtKB	H0YK90, Q9BUX1	CHAC1		0045746 // negative regulation of Notch signaling pathway (PMID:22445366 [IMP]) /// 0070059 // apoptosis in response to endoplasmic reticulum stress (PMID:19109178 [IMP]) /// 0007219 // Notch signaling pathway (GO_REF:0000037 [IEA] UniProtKB-KW:KW-0914) /// 0022008 // neurogenesis (GO_REF:0000019 [IEA] Ensembl:ENSMUSP00000028780) /// 0022008 // neurogenesis (GO_REF:0000024 [ISS] UniProtKB:Q8R3J5)…	0005802 // trans-Golgi network (GO_REF:0000024 [ISS] UniProtKB:Q8R3J5) /// 0005829 // cytosol (PMID:19109178 [IDA]) /// 0005802 // trans-Golgi network (GO_REF:0000019 [IEA] Ensembl:ENSMUSP00000028780) /// 0005794 // Golgi apparatus (GO_REF:0000039 [IEA] UniProtKB-SubCell:SL-0132)	0005112 // Notch binding (GO_REF:0000024 [ISS] UniProtKB:Q8R3J5) /// 0005112 // Notch binding (GO_REF:0000019 [IEA] Ensembl:ENSMUSP00000028780) /// 0005515 // protein binding (PMID:16189514 [IPI] UniProtKB:Q9BQY4)	Cation transport regulator-like protein 1	H0YK90_HUMAN|CHAC1	protein	taxon:9606	20130119	ENSEMBL			0.90802	6.60293	2	1	1560	15	15	14	14	1	0	0	0	0
DDAH2 (NT_167246 3037706..3040929)	0.374572	0.374572	0.374572	5.92744	4.33679	4.33679	4.33679	8.84537	4.33679e-06	8.84537	1.85898	0.0630294	1	1	4.33679e-06	8.84537	1.85899	0.0630294	1	1																0.0760176	0.552784	1	1	1331	1	1	1	1	1	1	1	0	0
DPPA4	0.176981	0.176981	0.176981	5.92744	2.04909	2.04909	2.04909	8.84537	2.04909e-06	8.84537	1.27782	0.201312	1	1	2.04909e-06	8.84537	1.27782	0.201312	1	1	UniProtKB	Q7L190	DPPA4		0006355 // regulation of transcription, DNA-dependent (GO_REF:0000037 [IEA] UniProtKB-KW:KW-0805) /// 0007275 // multicellular organismal development (GO_REF:0000037 [IEA] UniProtKB-KW:KW-0217) /// 0006351 // transcription, DNA-dependent (GO_REF:0000037 [IEA] UniProtKB-KW:KW-0804)	0005634 // nucleus (GO_REF:0000039 [IEA] UniProtKB-SubCell:SL-0191)	0005515 // protein binding (PMID:16169070 [IPI] UniProtKB:Q99961)	Developmental pluripotency-associated protein 4	DPPA4_HUMAN|DPPA4	protein	taxon:9606	20130121	IntAct			0.0359174	0.261184	1	1	2817	60	67	1	1	1	1	1	0	0
ENPP3	0.157521	0.157521	0.157521	5.92744	1.82378	1.82378	1.82378	8.84537	1.82378e-06	8.84537	1.20553	0.227999	1	1	1.82378e-06	8.84537	1.20553	0.227999	1	1	UniProtKB	F5GY67, O14638, B0AZV2, F8W6H5	ENPP3		0006955 // immune response (GO_REF:0000002 [IEA] InterPro:IPR001212) /// 0030505 // inorganic diphosphate transport (PMID:10513816 [IDA]) /// 0006796 // phosphate metabolic process (PMID:10513816 [IDA]) /// 0009143 // nucleoside triphosphate catabolic process (PMID:10513816 [IDA])	0005576 // extracellular region (GO_REF:0000039 [IEA] UniProtKB-SubCell:SL-0243) /// 0005887 // integral to plasma membrane (PMID:9344668 [TAS]) /// 0048471 // perinuclear region of cytoplasm (PMID:10513816 [IDA])	0004551 // nucleotide diphosphatase activity (PMID:9344668 [TAS]) /// 0004528 // phosphodiesterase I activity (GO_REF:0000003 [IEA] EC:3.1.4.1) /// 0030247 // polysaccharide binding (GO_REF:0000002 [IEA] InterPro:IPR001212) /// 0005044 // scavenger receptor activity (GO_REF:0000002 [IEA] InterPro:IPR001212) /// 0046872 // metal ion binding (GO_REF:0000037 [IEA] UniProtKB-KW:KW-0479) /// 0003676 /…	Alkaline phosphodiesterase I	B0AZV2_HUMAN|ENPP3	protein	taxon:9606	20130119	InterPro			0.0319682	0.232466	1	1	3165	79	126	1	1	1	0	0	0	0
SBSPON	0.131268	0.131268	0.131268	5.92744	1.51982	1.51982	1.51982	8.84537	1.51982e-06	8.84537	1.10049	0.271118	1	1	1.51982e-06	8.84537	1.10049	0.271118	1	1	UniProtKB	Q8IVN8	SBSPON		0006955 // immune response (GO_REF:0000002 [IEA] InterPro:IPR001212)	0005578 // proteinaceous extracellular matrix (GO_REF:0000039 [IEA] UniProtKB-SubCell:SL-0111) /// 0031012 // extracellular matrix (PMID:20551380 [IDA])	0030247 // polysaccharide binding (GO_REF:0000002 [IEA] InterPro:IPR001212) /// 0005044 // scavenger receptor activity (GO_REF:0000002 [IEA] InterPro:IPR001212)	Somatomedin-B and thrombospondin type-1 domain-containing protein	SBSPO_HUMAN|C8orf84|SBSPON|RPESP	protein	taxon:9606	20130119	InterPro			0.0266402	0.193722	1	1	3798	34	34	1	1	1	0	0	0	0
TACR2	0.206356	0.206356	0.206356	5.92744	2.38919	2.38919	2.38919	8.84537	2.38919e-06	8.84537	1.3798	0.167648	1	1	2.38919e-06	8.84537	1.3798	0.167648	1	1	UniProtKB	P21452, A6NEW7	TACR2		0007588 // excretion (PMID:10862829 [TAS]) /// 0007217 // tachykinin receptor signaling pathway (PMID:8307161 [TAS]) /// 0006936 // muscle contraction (PMID:2173708 [TAS])	0005886 // plasma membrane (Reactome:REACT_15291 [TAS]) /// 0005887 // integral to plasma membrane (PMID:2173708 [TAS]) /// 0005886 // plasma membrane (Reactome:REACT_17046 [TAS]) /// 0016021 // integral to membrane (GO_REF:0000002 [IEA] InterPro:IPR000276|InterPro:IPR000913|InterPro:IPR001681) /// 0005886 // plasma membrane (GO_REF:0000002 [IEA] InterPro:IPR000913|InterPro:IPR001681) /// 0005886…	0004995 // tachykinin receptor activity (GO_REF:0000002 [IEA] InterPro:IPR000913|InterPro:IPR001681)	Substance-K receptor	A6NEW7_HUMAN|TACR2	protein	taxon:9606	20130119	InterPro			0.0418789	0.304534	1	1	2416	45	51	1	1	1	0	0	0	0
CPLX2	0.101045	0.101045	0.101045	5.92744	1.1699	1.1699	1.1699	8.84537	1.1699e-06	8.84537	0.965528	0.334281	1	1	1.1699e-06	8.84537	0.965528	0.334281	1	1	UniProtKB	D6RI05, D6RDN3, D6R960, D6RGY3, D6RBA5, Q6PUV4	CPLX2		0043303 // mast cell degranulation (GO_REF:0000037 [IEA] UniProtKB-KW:KW-0467) /// 0030154 // cell differentiation (GO_REF:0000037 [IEA] UniProtKB-KW:KW-0221) /// 0031915 // positive regulation of synaptic plasticity (GO_REF:0000019 [IEA] Ensembl:ENSMUSP00000026985) /// 0016079 // synaptic vesicle exocytosis (GO_REF:0000019 [IEA] Ensembl:ENSRNOP00000000117) /// 0007399 // nervous system developme…	0045202 // synapse (GO_REF:0000019 [IEA] Ensembl:ENSRNOP00000000117) /// 0030425 // dendrite (GO_REF:0000019 [IEA] Ensembl:ENSRNOP00000000117) /// 0031201 // SNARE complex (GO_REF:0000019 [IEA] Ensembl:ENSRNOP00000000117) /// 0043025 // cell soma (GO_REF:0000019 [IEA] Ensembl:ENSRNOP00000000117) /// 0005829 // cytosol (GO_REF:0000039 [IEA] UniProtKB-SubCell:SL-0091)	0019905 // syntaxin binding (GO_REF:0000002 [IEA] InterPro:IPR008849) /// 0017075 // syntaxin-1 binding (GO_REF:0000019 [IEA] Ensembl:ENSRNOP00000000117)	Complexin-2	D6R960_HUMAN|CPLX2	protein	taxon:9606	20130119	ENSEMBL			0.0205066	0.149119	2	0	4934	52	55	1	1	1	0	0	0	0
GRK7	0.285541	0.285541	0.285541	5.92744	3.306	3.306	3.306	8.84537	3.306e-06	8.84537	1.62309	0.10457	1	1	3.306e-06	8.84537	1.62309	0.10457	1	1	UniProtKB	Q8WTQ7	GRK7		0007165 // signal transduction (GO_REF:0000002 [IEA] InterPro:IPR000239) /// 0038032 /// 0007601 // visual perception (GO_REF:0000037 [IEA] UniProtKB-KW:KW-0844) /// 0046777 // protein amino acid autophosphorylation (PMID:15946941 [IMP])	0016020 // membrane (GO_REF:0000039 [IEA] UniProtKB-SubCell:SL-0162)	0005524 // ATP binding (GO_REF:0000037 [IEA] UniProtKB-KW:KW-0067) /// 0004703 // G-protein coupled receptor kinase activity (GO_REF:0000003 [IEA] EC:2.7.11.16) /// 0050254 // rhodopsin kinase activity (PMID:15946941 [IDA])	G protein-coupled receptor kinase 7	GRK7_HUMAN|GPRK7|GRK7	protein	taxon:9606	20130119	UniProtKB			0.0579493	0.421395	1	1	1746	36	39	1	1	1	0	0	0	0
LYPD2	1.86725	1.86725	1.86725	5.92744	21.619	21.619	21.619	8.84537	2.1619e-05	8.84537	4.15061	3.31597e-05	0.00365675	1	2.1619e-05	8.84537	4.15062	3.31593e-05	0.00365671	1	UniProtKB	Q6UXB3	LYPD2			0005886 // plasma membrane (GO_REF:0000039 [IEA] UniProtKB-SubCell:SL-0039) /// 0031225 // anchored to membrane (GO_REF:0000037 [IEA] UniProtKB-KW:KW-0336)		Ly6/PLAUR domain-containing protein 2	LYPD2_HUMAN|LYPD2|UNQ430/PRO788|LYPDC2	protein	taxon:9606	20130119	UniProtKB			0.378949	2.75564	1	0	534	2	2	2	2	1	0	0	2	2
RFPL1	0.333259	0.333259	0.333259	5.92744	3.85847	3.85847	3.85847	8.84537	3.85847e-06	8.84537	1.75347	0.079521	1	1	3.85847e-06	8.84537	1.75347	0.079521	1	1	UniProtKB	O75677	RFPL1				0046872 // metal ion binding (GO_REF:0000037 [IEA] UniProtKB-KW:KW-0479) /// 0008270 // zinc ion binding (GO_REF:0000002 [IEA] InterPro:IPR001841)	Ret finger protein-like 1	RFPL1_HUMAN|RFPL1|RFPL1L|RNF78	protein	taxon:9606	20130119	InterPro			0.0676333	0.491815	1	1	1496	0	5	0	1	0	0	0	0	0
RGS9	0.193164	0.193164	0.193164	5.92744	2.23645	2.23645	2.23645	8.84537	2.23645e-06	8.84537	1.33497	0.181887	1	1	2.23645e-06	8.84537	1.33497	0.181887	1	1	UniProtKB	O75916, E9PD91, J3QL70	RGS9		0008277 // regulation of G-protein coupled receptor protein signaling pathway (PMID:9765512 [TAS]) /// 0007186 // G-protein coupled receptor protein signaling pathway (GO_REF:0000002 [IEA] InterPro:IPR015898) /// 0043627 // response to estrogen stimulus (GO_REF:0000019 [IEA] Ensembl:ENSRNOP00000005076) /// 0038032 /// 0035556 /// 0007601 // visual perception (GO_REF:0000037 [IEA] UniProtKB-KW:KW-…	0005834 // heterotrimeric G-protein complex (GO_REF:0000002 [IEA] InterPro:IPR015898) /// 0005737 // cytoplasm (GO_REF:0000033 [IBA] PANTHER:PTN000090250) /// 0005634 // nucleus (GO_REF:0000019 [IEA] Ensembl:ENSRNOP00000005076) /// 0005886 // plasma membrane (GO_REF:0000033 [IBA] PANTHER:PTN000090250)	0004871 // signal transducer activity (GO_REF:0000002 [IEA] InterPro:IPR015898) /// 0005096 // GTPase activator activity (GO_REF:0000033 [IBA] PANTHER:PTN000090250) /// 0032403 // protein complex binding (GO_REF:0000019 [IEA] Ensembl:ENSRNOP00000005076)	Regulator of G-protein-signaling 9	E9PD91_HUMAN|RGS9	protein	taxon:9606	20130119	InterPro			0.0392016	0.285066	3	0	2581	37	43	1	1	1	0	0	1	1
VWA7 (NT_007592 31673370..31685108)	0.17109	0.17109	0.17109	5.92744	1.98088	1.98088	1.98088	8.84537	1.98088e-06	8.84537	1.25638	0.20898	1	1	1.98088e-06	8.84537	1.25638	0.20898	1	1																0.0347218	0.25249	1	0	2914	0	2	0	1	0	0	0	0	1
FOXH1	0.228381	0.228381	0.228381	5.92744	2.64419	2.64419	2.64419	8.84537	2.64419e-06	8.84537	1.45157	0.146622	1	1	2.64419e-06	8.84537	1.45157	0.146622	1	1	UniProtKB	O75593	FOXH1		0003151 /// 0021508 // floor plate formation (GO_REF:0000033 [IBA] PANTHER:PTN000215616) /// 0007179 // transforming growth factor beta receptor signaling pathway (GO_REF:0000024 [ISS] UniProtKB:O88621) /// 0045893 // positive regulation of transcription, DNA-dependent (PMID:9702198 [IDA]) /// 0035054 // embryonic heart tube anterior/posterior pattern formation (GO_REF:0000033 [IBA] PANTHER:PTN00…	0005667 // transcription factor complex (PMID:17438144 [IDA]) /// 0005634 // nucleus (PMID:16120611 [IDA]) /// 0032444 // activin responsive factor complex (PMID:9389648 [IDA]) /// 0005634 // nucleus (PMID:9702198 [IC] GO:0043565) /// 0005654 // nucleoplasm (Reactome:REACT_111132 [TAS])	0019904 // protein domain specific binding (PMID:9702198 [IPI] UniProtKB:Q15796) /// 0005515 // protein binding (PMID:18922797 [IPI] UniProtKB:Q7T103) /// 0008134 // transcription factor binding (GO_REF:0000033 [IBA] PANTHER:PTN000215024) /// 0044212 /// 0070412 // R-SMAD binding (PMID:16120611 [IMP]) /// 0050681 // androgen receptor binding (PMID:16120611 [IPI] UniProtKB:P10275) /// 0005515 // p…	Forkhead box protein H1	FOXH1_HUMAN|FOXH1|FAST1|FAST2	protein	taxon:9606	20100511	RefGenome			0.0463488	0.337038	1	1	2183	1	1	1	1	1	1	1	0	0
GALNT5	0.159232	0.159232	0.159232	5.92744	1.84359	1.84359	1.84359	8.84537	1.84359e-06	8.84537	1.21206	0.225491	1	1	1.84359e-06	8.84537	1.21206	0.225491	1	1	UniProtKB	Q7Z7M9	GALNT5		0043687 // post-translational protein modification (Reactome:REACT_22161 [TAS]) /// 0044267 // cellular protein metabolic process (Reactome:REACT_17015 [TAS]) /// 0006024 // glycosaminoglycan biosynthetic process (PMID:10545594 [TAS]) /// 0016266 // O-glycan processing (Reactome:REACT_115606 [TAS])	0016021 // integral to membrane (GO_REF:0000037 [IEA] UniProtKB-KW:KW-0812) /// 0000139 // Golgi membrane (Reactome:REACT_115586 [TAS]) /// 0005575 // cellular_component (GO_REF:0000015 [ND])	0004653 // polypeptide N-acetylgalactosaminyltransferase activity (PMID:10545594 [IDA])	Polypeptide N-acetylgalactosaminyltransferase 5	GALT5_HUMAN|GALNT5	protein	taxon:9606	20100719	Reactome			0.0323154	0.23499	1	1	3131	52	53	1	1	1	0	0	0	0
MICA (NT_113891 2881168..2895790)	0.967358	0.967358	0.967358	5.36292	11.291	11.291	11.291	8.00296	1.1291e-05	8.00296	2.96358	0.00304088	0.138446	1	1.1291e-05	8.00296	2.96358	0.00304087	0.138446	1																0.221723	1.61232	1	1	1369	0	8	0	3	0	0	1	0	1
GGNBP2 (NW_003315949 429635..475187)	4.7009	4.7009	4.7009	5.13358	55.083	55.083	55.083	7.66073	5.5083e-05	7.66073	6.50879	7.57603e-11	2.31124e-08	3.1664e-06	5.5083e-05	7.66073	6.50886	7.57538e-11	2.31105e-08	3.16613e-06																1.13725	8.26981	1	1	2847	0	64	0	32	0	0	7	0	2
ARMC3	0.147037	0.147037	0.147037	5.08066	1.72456	1.72456	1.72456	7.58175	1.72456e-06	7.58175	1.15006	0.250118	1	1	1.72456e-06	7.58175	1.15006	0.250118	1	1																0.0360326	0.262021	1	0	2808	132	141	1	1	1	0	0	1	1
CALB1	0.163129	0.163129	0.163129	5.08066	1.9133	1.9133	1.9133	7.58175	1.9133e-06	7.58175	1.21136	0.225756	1	1	1.9133e-06	7.58175	1.21136	0.225756	1	1	UniProtKB	B7Z9J4, E5RIZ8, E5RG14, P05937	CALB1		0007626 // locomotory behavior (GO_REF:0000019 [IEA] Ensembl:ENSMUSP00000029876) /// 0007611 // learning or memory (GO_REF:0000019 [IEA] Ensembl:ENSRNOP00000010845) /// 0072286 /// 0048167 // regulation of synaptic plasticity (GO_REF:0000019 [IEA] Ensembl:ENSRNOP00000010845) /// 0072221 /// 0071310 /// 0072205 /// 0035502 /// 0010842 // retina layer formation (GO_REF:0000019 [IEA] Ensembl:ENSMUSP…	0005829 // cytosol (GO_REF:0000019 [IEA] Ensembl:ENSMUSP00000029876) /// 0043025 // cell soma (GO_REF:0000019 [IEA] Ensembl:ENSMUSP00000029876) /// 0005634 // nucleus (GO_REF:0000019 [IEA] Ensembl:ENSMUSP00000029876) /// 0030425 // dendrite (GO_REF:0000019 [IEA] Ensembl:ENSMUSP00000029876) /// 0005634 // nucleus (PMID:16928804 [IDA]) /// 0030424 // axon (GO_REF:0000019 [IEA] Ensembl:ENSMUSP000000…	0005509 // calcium ion binding (GO_REF:0000002 [IEA] InterPro:IPR002048|InterPro:IPR011992) /// 0005499 // vitamin D binding (GO_REF:0000037 [IEA] UniProtKB-KW:KW-0848) /// 0005515 // protein binding (PMID:20098747 [IPI] UniProtKB:Q9Y6K9) /// 0005509 // calcium ion binding (GO_REF:0000002 [IEA] InterPro:IPR011992)	Calbindin 1, 28kDa, isoform CRA_a	B7Z9J4_HUMAN|hCG_33059|CALB1	protein	taxon:9606	20130119	InterPro			0.0399761	0.290697	1	1	2531	8	8	1	1	1	0	0	0	0
CR1	0.0414287	0.0414287	0.0414287	5.08066	0.485908	0.485908	0.485908	7.58175	4.85908e-07	7.58175	0.610463	0.541555	1	1	4.85908e-07	7.58175	0.610463	0.541555	1	1	UniProtKB	P17927	CR1		0045087 // innate immune response (Reactome:REACT_6802 [TAS]) /// 0006958 // complement activation, classical pathway (GO_REF:0000037 [IEA] UniProtKB-KW:KW-0180) /// 0045959 // negative regulation of complement activation, classical pathway (PMID:10531307 [IDA]) /// 0045957 // negative regulation of complement activation, alternative pathway (PMID:10531307 [IDA]) /// 0030449 // regulation of comp…	0005886 // plasma membrane (Reactome:REACT_118692 [TAS]) /// 0009986 // cell surface (PMID:6978375 [IDA]) /// 0005886 // plasma membrane (Reactome:REACT_118580 [TAS]) /// 0005887 // integral to plasma membrane (PMID:6910481 [IDA]) /// 0005886 // plasma membrane (Reactome:REACT_118673 [TAS]) /// 0005886 // plasma membrane (Reactome:REACT_118631 [TAS]) /// 0009986 // cell surface (PMID:2972794 [IDA…	0004877 // complement component C3b receptor activity (PMID:2972794 [IDA]) /// 0001851 // complement component C3b binding (PMID:2972794 [IDA]) /// 0001861 // complement component C4b receptor activity (PMID:2972794 [IDA]) /// 0001855 // complement component C4b binding (PMID:2972794 [IDA])	Complement receptor type 1	CR1_HUMAN|C3BR|CR1	protein	taxon:9606	20120202	UniProtKB			0.0101525	0.0738265	2	0	9966	101	107	1	1	1	0	0	0	0
CYP2E1	0.247678	0.247678	0.247678	5.08066	2.90495	2.90495	2.90495	7.58175	2.90495e-06	7.58175	1.49263	0.135534	1	1	2.90495e-06	7.58175	1.49263	0.135534	1	1	UniProtKB	H0Y593, F5H694, H0Y7H4, P05181	CYP2E1		0010243 // response to organic nitrogen (GO_REF:0000019 [IEA] Ensembl:ENSRNOP00000016883) /// 0016098 // monoterpenoid metabolic process (PMID:16401082 [IDA]) /// 0055114 // oxidation reduction (PMID:16401082 [IDA]) /// 0008202 // steroid metabolic process (PMID:18356043 [IMP]) /// 0017144 // drug metabolic process (PMID:19219744 [IDA]) /// 0046483 // heterocycle metabolic process (PMID:19651758 …	0005789 // endoplasmic reticulum membrane (Reactome:REACT_122 [TAS]) /// 0005739 // mitochondrion (GO_REF:0000019 [IEA] Ensembl:ENSRNOP00000016883) /// 0031227 // intrinsic to endoplasmic reticulum membrane (GO_REF:0000019 [IEA] Ensembl:ENSRNOP00000016883) /// 0005789 // endoplasmic reticulum membrane (Reactome:REACT_228 [TAS]) /// 0000139 // Golgi membrane (GO_REF:0000019 [IEA] Ensembl:ENSRNOP00…	0004497 // monooxygenase activity (PMID:19651758 [IDA]) /// 0020037 // heme binding (GO_REF:0000002 [IEA] InterPro:IPR001128|InterPro:IPR002401) /// 0016705 // oxidoreductase activity, acting on paired donors, with incorporation or reduction of molecular oxygen (GO_REF:0000002 [IEA] InterPro:IPR001128|InterPro:IPR002401|InterPro:IPR017972) /// 0005506 // iron ion binding (GO_REF:0000002 [IEA] Int…	Cytochrome P450 2E1	F5H694_HUMAN|CYP2E1	protein	taxon:9606	20130119	ENSEMBL			0.0606955	0.441365	1	1	1667	5	5	1	1	1	1	1	0	0
FNDC1	0.0630253	0.0630253	0.0630253	5.08066	0.739208	0.739208	0.739208	7.58175	7.39208e-07	7.58175	0.75295	0.45148	1	1	7.39208e-07	7.58175	0.75295	0.45148	1	1	UniProtKB	Q4ZHG4	FNDC1		0010666 // positive regulation of cardiac muscle cell apoptosis (GO_REF:0000019 [IEA] Ensembl:ENSRNOP00000029878) /// 0051223 // regulation of protein transport (GO_REF:0000019 [IEA] Ensembl:ENSRNOP00000029878) /// 0001934 // positive regulation of protein amino acid phosphorylation (GO_REF:0000019 [IEA] Ensembl:ENSRNOP00000029878) /// 0071456	0031966 // mitochondrial membrane (GO_REF:0000019 [IEA] Ensembl:ENSRNOP00000029878) /// 0005911 // cell-cell junction (GO_REF:0000019 [IEA] Ensembl:ENSRNOP00000029878) /// 0005576 // extracellular region (GO_REF:0000039 [IEA] UniProtKB-SubCell:SL-0243) /// 0005886 // plasma membrane (GO_REF:0000019 [IEA] Ensembl:ENSRNOP00000029878)		Fibronectin type III domain-containing protein 1	FNDC1_HUMAN|FNDC1|FNDC2|KIAA1866|MEL4B3	protein	taxon:9606	20130119	ENSEMBL			0.0154449	0.112312	1	1	6551	49	52	1	1	1	0	0	0	0
RSPO3	0.192844	0.192844	0.192844	5.08066	2.26182	2.26182	2.26182	7.58175	2.26182e-06	7.58175	1.31708	0.187812	1	1	2.26182e-06	7.58175	1.31708	0.187812	1	1	UniProtKB	Q9BXY4	RSPO3		0060070 // Wnt receptor signaling pathway through beta-catenin (GO_REF:0000019 [IEA] Ensembl:ENSMUSP00000090287) /// 0060670 // branching involved in embryonic placenta morphogenesis (GO_REF:0000019 [IEA] Ensembl:ENSMUSP00000090287)	0005576 // extracellular region (GO_REF:0000039 [IEA] UniProtKB-SubCell:SL-0243)	0008201 // heparin binding (GO_REF:0000019 [IEA] Ensembl:ENSMUSP00000090287) /// 0005109 // frizzled binding (GO_REF:0000019 [IEA] Ensembl:ENSMUSP00000090287)	R-spondin-3	RSPO3_HUMAN|PWTSR|RSPO3|THSD2	protein	taxon:9606	20130119	ENSEMBL			0.047258	0.34365	1	1	2141	72	73	1	1	1	0	0	0	0
ACE2	0.23546	0.23546	0.23546	5.08066	2.76165	2.76165	2.76165	7.58175	2.76165e-06	7.58175	1.45535	0.145572	1	1	2.76165e-06	7.58175	1.45535	0.145572	1	1	UniProtKB	Q9BYF1	ACE2		0009615 // response to virus (PMID:18343844 [IDA]) /// 0032800 // receptor biosynthetic process (PMID:18258853 [IMP]) /// 0042312 // regulation of vasodilation (PMID:15380922 [IC] GO:0004180) /// 2000379 /// 0006508 // proteolysis (GO_REF:0000037 [IEA] UniProtKB-KW:KW-0645) /// 0042127 // regulation of cell proliferation (PMID:17703127 [TAS]) /// 0003051 // angiotensin-mediated drinking behavior …	0005576 // extracellular region (PMID:10969042 [IDA]) /// 0045121 // membrane raft (PMID:18279660 [TAS]) /// 0005886 // plasma membrane (GO_REF:0000039 [IEA] UniProtKB-SubCell:SL-0039) /// 0005615 // extracellular space (PMID:18258853 [IDA]) /// 0016021 // integral to membrane (GO_REF:0000037 [IEA] UniProtKB-KW:KW-0812) /// 0009986 // cell surface (PMID:18343844 [IDA])	0004180 // carboxypeptidase activity (PMID:15380922 [IDA]) /// 0008237 // metallopeptidase activity (PMID:10924499 [IDA]) /// 0046872 // metal ion binding (GO_REF:0000037 [IEA] UniProtKB-KW:KW-0479) /// 0004180 // carboxypeptidase activity (PMID:18258853 [IDA]) /// 0008241 // peptidyl-dipeptidase activity (PMID:10924499 [IDA]) /// 0004180 // carboxypeptidase activity (PMID:10969042 [IDA]) /// 000…	Angiotensin-converting enzyme 2	ACE2_HUMAN|ACE2|UNQ868/PRO1885	protein	taxon:9606	20080519	BHF-UCL			0.0577014	0.419592	1	0	3507	20	20	2	2	1	0	0	2	2
COL11A2 (NT_167245 4411775..4441552)	0.0624911	0.0624911	0.0624911	5.08066	0.732943	0.732943	0.732943	7.58175	7.32943e-07	7.58175	0.749753	0.453404	1	1	7.32943e-07	7.58175	0.749753	0.453404	1	1																0.015314	0.11136	4	0	6607	0	2	0	1	0	0	1	0	0
KCNK7	0.264158	0.264158	0.264158	5.08066	3.09824	3.09824	3.09824	7.58175	3.09824e-06	7.58175	1.54149	0.123197	1	1	3.09824e-06	7.58175	1.54149	0.123197	1	1	UniProtKB	Q9Y2U2	KCNK7		0006813 // potassium ion transport (PMID:10206991 [TAS]) /// 0007268 // synaptic transmission (Reactome:REACT_13685 [TAS])	0016021 // integral to membrane (GO_REF:0000037 [IEA] UniProtKB-KW:KW-0812) /// 0005886 // plasma membrane (Reactome:REACT_75806 [TAS])	0005267 // potassium channel activity (GO_REF:0000037 [IEA] UniProtKB-KW:KW-0631) /// 0005244 // voltage-gated ion channel activity (GO_REF:0000037 [IEA] UniProtKB-KW:KW-0851)	Potassium channel subfamily K member 7	KCNK7_HUMAN|KCNK7	protein	taxon:9606	20130119	UniProtKB			0.0647341	0.470733	4	0	1563	2	2	1	1	1	0	0	0	0
LGI3	0.126417	0.126417	0.126417	5.08066	1.48272	1.48272	1.48272	7.58175	1.48272e-06	7.58175	1.06638	0.286252	1	1	1.48272e-06	7.58175	1.06638	0.286252	1	1	UniProtKB	Q8N145	LGI3		0006887 // exocytosis (GO_REF:0000037 [IEA] UniProtKB-KW:KW-0268) /// 0017157 // regulation of exocytosis (GO_REF:0000019 [IEA] Ensembl:ENSMUSP00000046705)	0008021 // synaptic vesicle (GO_REF:0000039 [IEA] UniProtKB-SubCell:SL-0259) /// 0030054 // cell junction (GO_REF:0000037 [IEA] UniProtKB-KW:KW-0965) /// 0043005 // neuron projection (GO_REF:0000039 [IEA] UniProtKB-SubCell:SL-0261) /// 0005576 // extracellular region (GO_REF:0000039 [IEA] UniProtKB-SubCell:SL-0243)		Leucine-rich repeat LGI family member 3	LGI3_HUMAN|UNQ8190/PRO23199|LGIL4|LGI3	protein	taxon:9606	20130119	UniProtKB			0.0309796	0.225277	1	1	3266	20	20	1	1	1	0	0	0	0
NCALD	0.0920167	0.0920167	0.0920167	5.08066	1.07924	1.07924	1.07924	7.58175	1.07924e-06	7.58175	0.909792	0.362932	1	1	1.07924e-06	7.58175	0.909792	0.362932	1	1	UniProtKB	E5RIZ1, E5RGA9, E5RK89, E5RHE8, E5RIX3, E5RHC8, E5RJT1, P61601, E5RI95, E5RJJ6, E5RFL9, E5RI78, E5RIG4, E5RGZ0, E5RIA5	NCALD		0016192 // vesicle-mediated transport (PMID:11964161 [NAS]) /// 0007268 // synaptic transmission (Reactome:REACT_13685 [TAS]) /// 0007268 // synaptic transmission (Reactome:REACT_13477 [TAS])	0030130 // clathrin coat of trans-Golgi network vesicle (PMID:11964161 [NAS]) /// 0005829 // cytosol (Reactome:REACT_21414 [TAS]) /// 0005622 // intracellular (PMID:11256614 [IDA]) /// 0005829 // cytosol (Reactome:REACT_21269 [TAS]) /// 0005829 // cytosol (PMID:11964161 [NAS])	0030276 // clathrin binding (PMID:11964161 [IDA]) /// 0005509 // calcium ion binding (GO_REF:0000002 [IEA] InterPro:IPR001125|InterPro:IPR011992) /// 0015631 // tubulin binding (PMID:11964161 [IDA]) /// 0003779 // actin binding (PMID:11964161 [IDA]) /// 0005509 // calcium ion binding (GO_REF:0000002 [IEA] InterPro:IPR001125|InterPro:IPR002048|InterPro:IPR011992)	Neurocalcin-delta	E5RFL9_HUMAN|NCALD	protein	taxon:9606	20130119	InterPro			0.0225495	0.163975	8	0	4487	566	701	0	1	0	0	0	0	0
SLC25A52	0.348421	0.348421	0.348421	5.08066	4.08654	4.08654	4.08654	7.58175	4.08654e-06	7.58175	1.77036	0.0766673	1	1	4.08654e-06	7.58175	1.77036	0.0766673	1	1	UniProtKB	I3L0B8, Q3SY17	SLC25A52		0006810 // transport (GO_REF:0000037 [IEA] UniProtKB-KW:KW-0813) /// 0006810 // transport (GO_REF:0000038 [IEA] UniProtKB-KW:KW-0813)	0016021 // integral to membrane (GO_REF:0000037 [IEA] UniProtKB-KW:KW-0812) /// 0016021 // integral to membrane (GO_REF:0000038 [IEA] UniProtKB-KW:KW-0812) /// 0005743 // mitochondrial inner membrane (GO_REF:0000039 [IEA] UniProtKB-SubCell:SL-0168)		Solute carrier family 25 member 52	I3L0B8_HUMAN|SLC25A52	protein	taxon:9606	20130119	UniProtKB			0.0853835	0.62089	1	1	1185	1	1	1	1	1	0	0	0	0
ADAMTS19	0.0811316	0.0811316	0.0811316	5.08066	0.951573	0.951573	0.951573	7.58175	9.51573e-07	7.58175	0.854287	0.392946	1	1	9.51573e-07	7.58175	0.854287	0.392946	1	1	UniProtKB	Q8TE59, H0Y8Y0	ADAMTS19		0006508 // proteolysis (GO_REF:0000037 [IEA] UniProtKB-KW:KW-0645) /// 0006508 // proteolysis (GO_REF:0000002 [IEA] InterPro:IPR002870)	0005578 // proteinaceous extracellular matrix (GO_REF:0000039 [IEA] UniProtKB-SubCell:SL-0111)	0008270 // zinc ion binding (GO_REF:0000002 [IEA] InterPro:IPR002870|InterPro:IPR013273) /// 0046872 // metal ion binding (GO_REF:0000037 [IEA] UniProtKB-KW:KW-0479) /// 0008270 // zinc ion binding (GO_REF:0000002 [IEA] InterPro:IPR002870) /// 0004222 // metalloendopeptidase activity (GO_REF:0000002 [IEA] InterPro:IPR001590|InterPro:IPR002870|InterPro:IPR010294) /// 0004222 // metalloendopeptidas…	A disintegrin and metalloproteinase with thrombospondin motifs 19	H0Y8Y0_HUMAN|ADAMTS19	protein	taxon:9606	20130119	InterPro			0.019882	0.144578	1	1	5089	180	197	1	1	1	1	1	0	0
AGAP10 (NT_031847 714800..736550)	0.175395	0.175395	0.175395	5.08066	2.05716	2.05716	2.05716	7.58175	2.05716e-06	7.58175	1.25608	0.209087	1	1	2.05716e-06	7.58175	1.25608	0.209087	1	1																0.0429819	0.312555	1	1	2354	0	9	0	1	0	0	1	0	0
KCNC1	0.049352	0.049352	0.049352	5.08066	0.578837	0.578837	0.578837	7.58175	5.78837e-07	7.58175	0.666287	0.505228	1	1	5.78837e-07	7.58175	0.666287	0.505228	1	1	UniProtKB	P48547, K4DI87	KCNC1		0006813 // potassium ion transport (PMID:8449507 [TAS]) /// 0051260 // protein homooligomerization (GO_REF:0000002 [IEA] InterPro:IPR003131) /// 0007268 // synaptic transmission (Reactome:REACT_13685 [TAS])	0008076 // voltage-gated potassium channel complex (GO_REF:0000002 [IEA] InterPro:IPR003091|InterPro:IPR003968|InterPro:IPR003974) /// 0005886 // plasma membrane (Reactome:REACT_75857 [TAS])	0005249 // voltage-gated potassium channel activity (GO_REF:0000002 [IEA] InterPro:IPR003091|InterPro:IPR003968|InterPro:IPR003974|InterPro:IPR005403) /// 0005251 // delayed rectifier potassium channel activity (GO_REF:0000033 [IBA] PANTHER:PTN000164969) /// 0005249 // voltage-gated potassium channel activity (PMID:8449507 [TAS])	Potassium voltage-gated channel, Shaw-related subfamily, member 1, isoform CRA_a	K4DI87_HUMAN|hCG_14645|KCNC1	protein	taxon:9606	20130119	InterPro			0.0120941	0.0879459	2	1	8366	18	18	1	1	1	0	0	0	0
NSUN7	0.111649	0.111649	0.111649	5.08066	1.30951	1.30951	1.30951	7.58175	1.30951e-06	7.58175	1.00216	0.316267	1	1	1.30951e-06	7.58175	1.00216	0.316267	1	1	UniProtKB	Q8NE18	NSUN7				0008168 // methyltransferase activity (GO_REF:0000037 [IEA] UniProtKB-KW:KW-0489)	Putative methyltransferase NSUN7	NSUN7_HUMAN|NSUN7	protein	taxon:9606	20130119	UniProtKB			0.0273606	0.19896	1	1	3698	62	75	1	1	1	0	0	0	0
PRDM16	0.0473322	0.0473322	0.0473322	5.08066	0.555148	0.555148	0.555148	7.58175	5.55148e-07	7.58175	0.65251	0.514072	1	1	5.55148e-07	7.58175	0.65251	0.514072	1	1	UniProtKB	H0YA13, F8WEV3, Q9HAZ2, D6RDW0, D6RFY3, D3YTA5	PRDM16		0045892 // negative regulation of transcription, DNA-dependent (PMID:12816872 [IDA]) /// 0045892 // negative regulation of transcription, DNA-dependent (GO_REF:0000024 [ISS] UniProtKB:A2A935) /// 0043457 // regulation of cellular respiration (GO_REF:0000024 [ISS] UniProtKB:A2A935) /// 0006351 // transcription, DNA-dependent (GO_REF:0000037 [IEA] UniProtKB-KW:KW-0804) /// 0022008 // neurogenesis (…	0005634 // nucleus (PMID:19049980 [IDA]) /// 0017053 // transcriptional repressor complex (GO_REF:0000024 [ISS] UniProtKB:A2A935) /// 0005622 // intracellular (GO_REF:0000002 [IEA] InterPro:IPR015880)	0005515 // protein binding (PMID:19049980 [IPI] UniProtKB:P12755) /// 0043565 // sequence-specific DNA binding (PMID:12816872 [IDA]) /// 0005515 // protein binding (PMID:19049980 [IPI] UniProtKB:Q15796) /// 0005515 // protein binding (PMID:19049980 [IPI] UniProtKB:Q13547) /// 0046872 // metal ion binding (GO_REF:0000037 [IEA] UniProtKB-KW:KW-0479) /// 0003713 // transcription coactivator activity…	PR domain zinc finger protein 16	D3YTA5_HUMAN|PRDM16	protein	taxon:9606	20130119	InterPro			0.0115992	0.0843466	2	0	8723	179	191	1	1	1	0	0	0	0
RAB40AL	0.401243	0.401243	0.401243	5.08066	4.70608	4.70608	4.70608	7.58175	4.70608e-06	7.58175	1.89982	0.0574564	0.972275	1	4.70608e-06	7.58175	1.89982	0.0574564	0.972274	1	UniProtKB	P0C0E4	RAB40AL		0015031 // protein transport (GO_REF:0000002 [IEA] InterPro:IPR003579) /// 0007264 // small GTPase mediated signal transduction (GO_REF:0000002 [IEA] InterPro:IPR001806|InterPro:IPR003579) /// 0016567 // protein ubiquitination (GO_REF:0000041 [IEA] UniPathway:UPA00143)	0005739 // mitochondrion (GO_REF:0000039 [IEA] UniProtKB-SubCell:SL-0173) /// 0005886 // plasma membrane (GO_REF:0000039 [IEA] UniProtKB-SubCell:SL-0039) /// 0044444 // cytoplasmic part (PMID:22581972 [IMP])	0005525 // GTP binding (GO_REF:0000037 [IEA] UniProtKB-KW:KW-0342)	Ras-related protein Rab-40A-like	RB40L_HUMAN|RAB40AL|RLGP	protein	taxon:9606	20130119	UniProtKB			0.0983279	0.715019	1	1	1029	1	1	1	1	1	0	0	0	0
RSPH9	0.389876	0.389876	0.389876	5.08066	4.57276	4.57276	4.57276	7.58175	4.57276e-06	7.58175	1.87272	0.0611072	1	1	4.57276e-06	7.58175	1.87272	0.0611072	1	1	UniProtKB	Q9H1X1	RSPH9		0003341 /// 0035083 // cilium axoneme assembly (PMID:19200523 [IMP])	0005737 // cytoplasm (GO_REF:0000037 [IEA] UniProtKB-KW:KW-0963) /// 0035085 // cilium axoneme (PMID:19200523 [IC] GO:0003341) /// 0005856 // cytoskeleton (GO_REF:0000037 [IEA] UniProtKB-KW:KW-0206) /// 0031514 // motile secondary cilium (PMID:19200523 [IC] GO:0003341)		Radial spoke head protein 9 homolog	RSPH9_HUMAN|RSPH9|C6orf206|MRPS18AL1	protein	taxon:9606	20091209	BHF-UCL			0.0955424	0.694764	2	0	1059	31	35	1	1	1	0	0	1	1
SLC51B	0.439233	0.439233	0.439233	5.08066	5.15165	5.15165	5.15165	7.58175	5.15165e-06	7.58175	1.98773	0.0468419	0.863589	1	5.15165e-06	7.58175	1.98773	0.0468419	0.863589	1	UniProtKB	Q86UW2	SLC51B		0090314 /// 0031647 // regulation of protein stability (GO_REF:0000024 [ISS] UniProtKB:Q80WK2) /// 0015721 // bile acid and bile salt transport (GO_REF:0000024 [ISS] UniProtKB:Q80WK2) /// 0070863 // positive regulation of protein exit from endoplasmic reticulum (GO_REF:0000024 [ISS] UniProtKB:Q80WK2) /// 0060050 // positive regulation of protein amino acid glycosylation (GO_REF:0000024 [ISS] UniP…	0043234 // protein complex (GO_REF:0000024 [ISS] UniProtKB:Q80WK2) /// 0016021 // integral to membrane (GO_REF:0000024 [ISS] UniProtKB:Q80WK2) /// 0005886 // plasma membrane (PMID:12719432 [IDA])	0005215 // transporter activity (GO_REF:0000019 [IEA] Ensembl:ENSMUSP00000064494) /// 0046982 // protein heterodimerization activity (GO_REF:0000024 [ISS] UniProtKB:Q80WK2)	Organic solute transporter subunit beta	OSTB_HUMAN|OSTB|SLC51B	protein	taxon:9606	20130119	ENSEMBL			0.107638	0.782718	1	1	940	15	17	1	1	1	1	1	0	0
TTBK1	0.0579235	0.0579235	0.0579235	5.08066	0.679371	0.679371	0.679371	7.58175	6.79371e-07	7.58175	0.721832	0.470398	1	1	6.79371e-07	7.58175	0.721832	0.470398	1	1	UniProtKB	Q5TCY1	TTBK1			0005634 // nucleus (PMID:18029348 [IDA]) /// 0005737 // cytoplasm (PMID:18029348 [IDA]) /// 0030054 // cell junction (PMID:18029348 [IDA])	0005524 // ATP binding (GO_REF:0000037 [IEA] UniProtKB-KW:KW-0067) /// 0004674 // protein serine/threonine kinase activity (GO_REF:0000037 [IEA] UniProtKB-KW:KW-0723)	Tau-tubulin kinase 1	TTBK1_HUMAN|BDTK|TTBK1|KIAA1855	protein	taxon:9606	20130119	UniProtKB			0.0141946	0.10322	1	1	7128	27	27	1	1	1	0	0	0	0
ZSCAN1	0.201012	0.201012	0.201012	5.08066	2.35762	2.35762	2.35762	7.58175	2.35762e-06	7.58175	1.34468	0.178727	1	1	2.35762e-06	7.58175	1.34468	0.178727	1	1	UniProtKB	Q8NBB4	ZSCAN1		0006351 // transcription, DNA-dependent (GO_REF:0000037 [IEA] UniProtKB-KW:KW-0804) /// 0016032 // viral reproduction (GO_REF:0000002 [IEA] InterPro:IPR008916)	0005634 // nucleus (GO_REF:0000039 [IEA] UniProtKB-SubCell:SL-0191)	0046872 // metal ion binding (GO_REF:0000037 [IEA] UniProtKB-KW:KW-0479) /// 0003677 // DNA binding (GO_REF:0000037 [IEA] UniProtKB-KW:KW-0238) /// 0008270 // zinc ion binding (GO_REF:0000002 [IEA] InterPro:IPR007087|InterPro:IPR015880) /// 0003700 // transcription factor activity (GO_REF:0000002 [IEA] InterPro:IPR003309)	Zinc finger and SCAN domain-containing protein 1	ZSCA1_HUMAN|ZSCAN1	protein	taxon:9606	20130119	InterPro			0.0492597	0.358206	1	1	2054	14	19	1	1	1	0	0	0	0
POU5F1 (NT_167249 2467050..2473404)	0.188185	0.188185	0.188185	5.08066	2.20718	2.20718	2.20718	7.58175	2.20718e-06	7.58175	1.30107	0.193233	1	1	2.20718e-06	7.58175	1.30107	0.193233	1	1																0.0461164	0.335349	3	0	2194	0	7	0	1	0	0	1	0	0
GOLGA6L4	0.376856	0.376856	0.376856	4.86897	4.43815	4.43815	4.43815	7.26584	4.43815e-06	7.26584	1.8342	0.0666237	1	1	4.43815e-06	7.26584	1.83421	0.0666237	1	1																0.097405	0.708308	1	1	4155	0	5	0	4	0	0	0	0	0
WISP1	0.285195	0.285195	0.285195	4.65727	3.37395	3.37395	3.37395	6.94994	3.37395e-06	6.94994	1.58907	0.112044	1	1	3.37395e-06	6.94994	1.58907	0.112044	1	1	UniProtKB	Q5JBS7, O95388, E7EMM5	WISP1		0001558 // regulation of cell growth (GO_REF:0000002 [IEA] InterPro:IPR000867) /// 0007267 // cell-cell signaling (PMID:9843955 [TAS]) /// 0007165 // signal transduction (PMID:9843955 [TAS]) /// 0007155 // cell adhesion (GO_REF:0000037 [IEA] UniProtKB-KW:KW-0130) /// 0016055 // Wnt receptor signaling pathway (GO_REF:0000037 [IEA] UniProtKB-KW:KW-0879)	0005576 // extracellular region (GO_REF:0000038 [IEA] UniProtKB-KW:KW-0964) /// 0005737 // cytoplasm (PMID:18029348 [IDA]) /// 0005615 // extracellular space (PMID:9843955 [NAS]) /// 0005576 // extracellular region (GO_REF:0000002 [IEA] InterPro:IPR000867)	0005520 // insulin-like growth factor binding (GO_REF:0000002 [IEA] InterPro:IPR000867)	WNT1-inducible-signaling pathway protein 1	E7EMM5_HUMAN|WISP1	protein	taxon:9606	20130119	InterPro			0.0779803	0.567056	4	0	5190	27	27	4	4	1	1	1	0	0
G0S2	0.768516	0.768516	0.768516	4.65727	9.09179	9.09179	9.09179	6.94994	9.09179e-06	6.94994	2.60856	0.0090925	0.304993	1	9.09179e-06	6.94994	2.60856	0.00909248	0.304992	1	UniProtKB	P27469	G0S2		0043065 // positive regulation of apoptosis (PMID:19706769 [IDA]) /// 0006915 // apoptosis (PMID:19706769 [IDA]) /// 0044255 // cellular lipid metabolic process (Reactome:REACT_22279 [TAS]) /// 0044281	0005739 // mitochondrion (PMID:19706769 [IDA]) /// 0005811 // lipid particle (Reactome:REACT_115967 [TAS])	0003674 // molecular_function (GO_REF:0000015 [ND]) /// 0005515 // protein binding (PMID:19706769 [IPI] UniProtKB:P10415)	G0/G1 switch protein 2	G0S2_HUMAN|G0S2	protein	taxon:9606	20061026	UniProtKB			0.210134	1.52805	1	1	963	2	2	2	2	1	1	1	0	0
ZNF654	0.281316	0.281316	0.281316	4.44558	3.34498	3.34498	3.34498	6.63403	3.34498e-06	6.63403	1.57119	0.116138	1	1	3.34498e-06	6.63403	1.5712	0.116138	1	1	UniProtKB	Q8IZM8	ZNF654		0006355 // regulation of transcription, DNA-dependent (GO_REF:0000037 [IEA] UniProtKB-KW:KW-0805) /// 0006351 // transcription, DNA-dependent (GO_REF:0000037 [IEA] UniProtKB-KW:KW-0804)	0005634 // nucleus (GO_REF:0000039 [IEA] UniProtKB-SubCell:SL-0191)	0046872 // metal ion binding (GO_REF:0000037 [IEA] UniProtKB-KW:KW-0479) /// 0003677 // DNA binding (GO_REF:0000037 [IEA] UniProtKB-KW:KW-0238) /// 0008270 // zinc ion binding (GO_REF:0000002 [IEA] InterPro:IPR007087|InterPro:IPR015880)	Zinc finger protein 654	ZN654_HUMAN|ZNF654	protein	taxon:9606	20130119	UniProtKB			0.0816457	0.59371	1	1	4957	3	4	3	4	0.75	3	3	0	0
MLXIPL (NT_007933 11040366..11071713)	0.425407	0.425407	0.425407	4.44558	5.05829	5.05829	5.05829	6.63403	5.05829e-06	6.63403	1.93212	0.0533441	0.933222	1	5.05829e-06	6.63403	1.93213	0.0533441	0.933221	1																0.123465	0.89781	4	0	3278	1	57	1	4	0.25	1	1	0	1
ACVRL1	0.0742966	0.0742966	0.0742966	4.23388	0.888473	0.888473	0.888473	6.31812	8.88473e-07	6.31812	0.803529	0.421669	1	1	8.88473e-07	6.31812	0.803529	0.421669	1	1	UniProtKB	G3V1W8, F8W0N2, P37023, D9IPD9, H3BTZ2, E7EN07	ACVRL1		0007179 // transforming growth factor beta receptor signaling pathway (GO_REF:0000019 [IEA] Ensembl:ENSMUSP00000000542) /// 0043537 // negative regulation of blood vessel endothelial cell migration (PMID:19592636 [IMP]) /// 0045603 // positive regulation of endothelial cell differentiation (GO_REF:0000019 [IEA] Ensembl:ENSMUSP00000000542) /// 0001955 // blood vessel maturation (PMID:20406889 [TAS…	0009986 // cell surface (PMID:8242742 [IDA]) /// 0030425 // dendrite (GO_REF:0000019 [IEA] Ensembl:ENSRNOP00000062675) /// 0016020 // membrane (GO_REF:0000002 [IEA] InterPro:IPR000333|InterPro:IPR003605) /// 0043025 // cell soma (GO_REF:0000019 [IEA] Ensembl:ENSRNOP00000062675) /// 0016020 // membrane (GO_REF:0000002 [IEA] InterPro:IPR000472) /// 0005887 // integral to plasma membrane (PMID:82427…	0016361 // activin receptor activity, type I (PMID:8242742 [IDA]) /// 0005515 // protein binding (PMID:11278302 [IPI] UniProtKB:Q8WUH2) /// 0005524 // ATP binding (PMID:12065756 [IDA]) /// 0005515 // protein binding (PMID:15611116 [IPI] UniProtKB:Q86TG7) /// 0004675 // transmembrane receptor protein serine/threonine kinase activity (PMID:8242742 [RCA]) /// 0005515 // protein binding (PMID:8242742…	Activin A receptor type II-like kinase 1 variant 3	D9IPD9_HUMAN|ACVRL1	protein	taxon:9606	20130119	ENSEMBL			0.0229744	0.167065	2	0	4404	4	4	1	1	1	1	1	0	0
MYOM3	0.0564142	0.0564142	0.0564142	4.23388	0.674627	0.674627	0.674627	6.31812	6.74627e-07	6.31812	0.700183	0.483813	1	1	6.74627e-07	6.31812	0.700183	0.483813	1	1	UniProtKB	Q5VTT5	MYOM3			0031430 // M band (GO_REF:0000019 [IEA] Ensembl:ENSMUSP00000101480)	0042803 // protein homodimerization activity (GO_REF:0000019 [IEA] Ensembl:ENSMUSP00000101480)	Myomesin-3	MYOM3_HUMAN|MYOM3	protein	taxon:9606	20130119	ENSEMBL			0.0174447	0.126854	1	0	5800	34	34	1	1	1	0	0	1	1
AKR1C1 (NW_003871071 1854..7632)	0.512856	0.512856	0.512856	4.23388	6.13297	6.13297	6.13297	6.31812	6.13297e-06	6.31812	2.11113	0.0347608	0.72352	1	6.13297e-06	6.31812	2.11114	0.0347608	0.72352	1																0.158588	1.15322	1	1	638	0	1	0	1	0	0	0	0	0
C1orf173	0.045705	0.045705	0.045705	4.23388	0.546562	0.546562	0.546562	6.31812	5.46562e-07	6.31812	0.63023	0.528544	1	1	5.46562e-07	6.31812	0.63023	0.528544	1	1																0.0141332	0.102773	1	0	7159	78	79	1	1	1	0	0	1	1
FGF9	0.0722301	0.0722301	0.0722301	4.23388	0.863761	0.863761	0.863761	6.31812	8.63761e-07	6.31812	0.792275	0.4282	1	1	8.63761e-07	6.31812	0.792276	0.4282	1	1	UniProtKB	P31371	FGF9		0008543 // fibroblast growth factor receptor signaling pathway (Reactome:REACT_9439 [TAS]) /// 0008543 // fibroblast growth factor receptor signaling pathway (Reactome:REACT_9396 [TAS]) /// 0008543 // fibroblast growth factor receptor signaling pathway (PMID:8663044 [IGI] UniProtKB:P11362) /// 0008284 // positive regulation of cell proliferation (PMID:8321227 [IDA]) /// 0006606 // protein import …	0005576 // extracellular region (Reactome:REACT_111110 [TAS]) /// 0005576 // extracellular region (Reactome:REACT_121068 [TAS]) /// 0005576 // extracellular region (Reactome:REACT_21365 [TAS]) /// 0005576 // extracellular region (Reactome:REACT_21411 [TAS]) /// 0005576 // extracellular region (Reactome:REACT_111233 [TAS]) /// 0005576 // extracellular region (Reactome:REACT_111095 [TAS]) /// 00056…	0008201 // heparin binding (GO_REF:0000037 [IEA] UniProtKB-KW:KW-0358) /// 0005104 // fibroblast growth factor receptor binding (GO_REF:0000019 [IEA] Ensembl:ENSRNOP00000015368) /// 0008083 // growth factor activity (GO_REF:0000019 [IEA] Ensembl:ENSRNOP00000015368)	Fibroblast growth factor 9	FGF9_HUMAN|FGF9	protein	taxon:9606	20130119	ENSEMBL			0.0223354	0.162418	1	1	4530	27	27	1	1	1	0	0	0	0
GSDMB	0.180875	0.180875	0.180875	4.23388	2.16298	2.16298	2.16298	6.31812	2.16298e-06	6.31812	1.25374	0.209938	1	1	2.16298e-06	6.31812	1.25374	0.209938	1	1	UniProtKB	Q8TAX9	GSDMB			0005737 // cytoplasm (GO_REF:0000039 [IEA] UniProtKB-SubCell:SL-0086)		Gasdermin-B	GSDMB_HUMAN|GSDML|PP4052|GSDMB|PRO2521	protein	taxon:9606	20130119	UniProtKB			0.0559311	0.406719	4	0	1809	15	16	1	1	1	1	1	0	0
KCNA1	0.0409874	0.0409874	0.0409874	4.23388	0.490146	0.490146	0.490146	6.31812	4.90146e-07	6.31812	0.596818	0.550629	1	1	4.90146e-07	6.31812	0.596818	0.550629	1	1	UniProtKB	Q09470	KCNA1		0006813 // potassium ion transport (PMID:8845167 [TAS]) /// 0051260 // protein homooligomerization (GO_REF:0000002 [IEA] InterPro:IPR003131) /// 0007268 // synaptic transmission (Reactome:REACT_13685 [TAS])	0016324 // apical plasma membrane (GO_REF:0000019 [IEA] Ensembl:ENSRNOP00000026731) /// 0008076 // voltage-gated potassium channel complex (GO_REF:0000002 [IEA] InterPro:IPR003091|InterPro:IPR003968|InterPro:IPR003972|InterPro:IPR004048) /// 0005886 // plasma membrane (Reactome:REACT_75857 [TAS]) /// 0044224	0015079 // potassium ion transmembrane transporter activity (PMID:8845167 [TAS]) /// 0005251 // delayed rectifier potassium channel activity (GO_REF:0000033 [IBA] PANTHER:PTN000164969) /// 0005267 // potassium channel activity (PMID:7842011 [TAS])	Potassium voltage-gated channel subfamily A member 1	KCNA1_HUMAN|KCNA1	protein	taxon:9606	20121213	RefGenome			0.0126744	0.0921652	1	1	7983	1	1	1	1	1	0	0	0	0
LOC100996499	0.336628	0.336628	0.336628	4.23388	4.02555	4.02555	4.02555	6.31812	4.02555e-06	6.31812	1.71038	0.0871956	1	1	4.02555e-06	6.31812	1.71038	0.0871956	1	1																0.104094	0.75695	1	1	972	27	28	1	1	1	0	0	0	0
MAPK8IP2	0.0947589	0.0947589	0.0947589	4.23388	1.13317	1.13317	1.13317	6.31812	1.13317e-06	6.31812	0.907459	0.364164	1	1	1.13317e-06	6.31812	0.907459	0.364164	1	1	UniProtKB	A8MTJ1, Q13387	MAPK8IP2		0060079 // regulation of excitatory postsynaptic membrane potential (GO_REF:0000024 [ISS] UniProtKB:Q9ERE9) /// 0001662 // behavioral fear response (GO_REF:0000024 [ISS] UniProtKB:Q9ERE9) /// 0045860 // positive regulation of protein kinase activity (PMID:12244047 [IDA]) /// 0046958 // nonassociative learning (GO_REF:0000024 [ISS] UniProtKB:Q9ERE9) /// 0007254 // JNK cascade (GO_REF:0000019 [IEA]…	0014069 // postsynaptic density (GO_REF:0000024 [ISS] UniProtKB:Q9ERE9) /// 0005737 // cytoplasm (GO_REF:0000019 [IEA] Ensembl:ENSMUSP00000023291) /// 0043234 // protein complex (GO_REF:0000019 [IEA] Ensembl:ENSRNOP00000052648) /// 0043025 // cell soma (GO_REF:0000019 [IEA] Ensembl:ENSMUSP00000023291) /// 0014069 // postsynaptic density (GO_REF:0000019 [IEA] Ensembl:ENSMUSP00000023291) /// 000573…	0030295 // protein kinase activator activity (PMID:12244047 [IGI] UniProtKB:Q92913) /// 0005198 // structural molecule activity (PMID:10490659 [TAS]) /// 0032403 // protein complex binding (GO_REF:0000019 [IEA] Ensembl:ENSRNOP00000052648) /// 0019894 // kinesin binding (GO_REF:0000024 [ISS] UniProtKB:Q9UQF2) /// 0030295 // protein kinase activator activity (PMID:12244047 [IDA]) /// 0005078 // MAP…	Uncharacterized protein	A8MTJ1_HUMAN|MAPK8IP2	protein	taxon:9606	20130119	ENSEMBL			0.0293019	0.213077	2	0	3453	9	9	1	1	1	0	0	0	0
MUC3A	0.0568751	0.0568751	0.0568751	4.23388	0.680138	0.680138	0.680138	6.31812	6.80138e-07	6.31812	0.703037	0.482033	1	1	6.80138e-07	6.31812	0.703037	0.482033	1	1	UniProtKB	Q02505	MUC3A		0043687 // post-translational protein modification (Reactome:REACT_22161 [TAS]) /// 0016266 // O-glycan processing (Reactome:REACT_115835 [TAS]) /// 0044267 // cellular protein metabolic process (Reactome:REACT_17015 [TAS]) /// 0007586 // digestion (GO_REF:0000029 [NAS]) /// 0016266 // O-glycan processing (Reactome:REACT_115606 [TAS]) /// 0030277 // maintenance of gastrointestinal epithelium (GO_…	0005796 // Golgi lumen (Reactome:REACT_115586 [TAS]) /// 0005796 // Golgi lumen (Reactome:REACT_115891 [TAS]) /// 0005796 // Golgi lumen (Reactome:REACT_116000 [TAS]) /// 0005796 // Golgi lumen (Reactome:REACT_116107 [TAS]) /// 0005796 // Golgi lumen (Reactome:REACT_115905 [TAS]) /// 0005796 // Golgi lumen (Reactome:REACT_116089 [TAS]) /// 0005796 // Golgi lumen (Reactome:REACT_115991 [TAS]) /// …	0005201 // extracellular matrix structural constituent (PMID:10405327 [NAS]) /// 0030197 // extracellular matrix constituent, lubricant activity (PMID:9334251 [NAS]) /// 0005201 // extracellular matrix structural constituent (PMID:10512748 [NAS])	Mucin-3A	MUC3A_HUMAN|MUC3A|MUC3	protein	taxon:9606	20070906	UniProtKB			0.0175872	0.127891	1	0	5753	3	3	1	1	1	0	0	1	1
MYO18B	0.0382023	0.0382023	0.0382023	4.23388	0.45684	0.45684	0.45684	6.31812	4.5684e-07	6.31812	0.576184	0.56449	1	1	4.5684e-07	6.31812	0.576185	0.564491	1	1	UniProtKB	F5H6I8, Q8IUG5, F5GXR6, H0YGQ4	MYO18B			0016459 // myosin complex (GO_REF:0000038 [IEA] UniProtKB-KW:KW-0518) /// 0005634 // nucleus (PMID:18029348 [IDA]) /// 0030017 // sarcomere (GO_REF:0000039 [IEA] UniProtKB-SubCell:SL-0313) /// 0005737 // cytoplasm (PMID:18029348 [IDA]) /// 0005730 // nucleolus (PMID:18029348 [IDA]) /// 0016461 // unconventional myosin complex (PMID:12547197 [IDA]) /// 0016459 // myosin complex (GO_REF:0000002 [IE…	0005524 // ATP binding (GO_REF:0000002 [IEA] InterPro:IPR001609) /// 0005524 // ATP binding (GO_REF:0000037 [IEA] UniProtKB-KW:KW-0067) /// 0005524 // ATP binding (GO_REF:0000038 [IEA] UniProtKB-KW:KW-0067) /// 0003774 // motor activity (GO_REF:0000002 [IEA] InterPro:IPR001609) /// 0003779 // actin binding (GO_REF:0000037 [IEA] UniProtKB-KW:KW-0009)	Unconventional myosin-XVIIIb	F5GXR6_HUMAN|MYO18B	protein	taxon:9606	20130119	InterPro			0.0118131	0.0859025	1	1	8565	166	186	1	1	1	0	0	0	0
NEUROD1	0.108995	0.108995	0.108995	4.23388	1.30341	1.30341	1.30341	6.31812	1.30341e-06	6.31812	0.97324	0.330434	1	1	1.30341e-06	6.31812	0.97324	0.330434	1	1	UniProtKB	Q13562	NEUROD1		0021542 // dentate gyrus development (GO_REF:0000024 [ISS] UniProtKB:Q60867) /// 0043066 // negative regulation of apoptosis (PMID:9308961 [ISS] UniProtKB:Q60867) /// 0031018 // endocrine pancreas development (Reactome:REACT_13698 [TAS]) /// 0022008 // neurogenesis (PMID:8786144 [TAS]) /// 0009749 // response to glucose stimulus (PMID:10545951 [IMP]) /// 0045893 // positive regulation of transcri…	0005634 // nucleus (PMID:10545951 [IC] GO:0043565) /// 0005654 // nucleoplasm (Reactome:REACT_13647 [TAS]) /// 0005737 // cytoplasm (GO_REF:0000039 [IEA] UniProtKB-SubCell:SL-0086) /// 0005634 // nucleus (PMID:14752053 [IDA])	0005515 // protein binding (PMID:14752053 [IPI] UniProtKB:Q15466) /// 0043565 // sequence-specific DNA binding (PMID:10545951 [IDA]) /// 0046982 // protein heterodimerization activity (PMID:10545951 [IPI] UniProtKB:P15923) /// 0003713 // transcription coactivator activity (PMID:14752053 [IDA]) /// 0003682 // chromatin binding (GO_REF:0000024 [ISS] UniProtKB:Q60867) /// 0003690 // double-stranded …	Neurogenic differentiation factor 1	NDF1_HUMAN|BHLHA3|NEUROD1|NEUROD	protein	taxon:9606	20110920	BHF-UCL			0.033704	0.245088	1	1	3002	2	2	1	1	1	0	0	0	0
SLC6A2	0.122663	0.122663	0.122663	4.23388	1.46686	1.46686	1.46686	6.31812	1.46686e-06	6.31812	1.03246	0.301857	1	1	1.46686e-06	6.31812	1.03246	0.301857	1	1	UniProtKB	H3BM11, H3BMY5, H3BRS0, P23975, B4DX48, H3BRE9, H3BML6	SLC6A2		0007268 // synaptic transmission (PMID:2008212 [TAS]) /// 0006810 // transport (PMID:2008212 [TAS]) /// 0055085 // transmembrane transport (Reactome:REACT_15518 [TAS]) /// 0015844 // monoamine transport (PMID:16024787 [IDA]) /// 0048265 // response to pain (GO_REF:0000019 [IEA] Ensembl:ENSMUSP00000129869) /// 0055085 // transmembrane transport (Reactome:REACT_19118 [TAS])	0005886 // plasma membrane (Reactome:REACT_20592 [TAS]) /// 0016020 // membrane (PMID:2008212 [TAS]) /// 0016021 // integral to membrane (GO_REF:0000038 [IEA] UniProtKB-KW:KW-0812) /// 0005887 // integral to plasma membrane (GO_REF:0000002 [IEA] InterPro:IPR002435)	0008504 // monoamine transmembrane transporter activity (PMID:16024787 [IDA]) /// 0005515 // protein binding (PMID:17156375 [IPI] UniProtKB:P37840) /// 0005515 // protein binding (PMID:11343649 [IPI] UniProtKB:Q9NRD5) /// 0005328 // neurotransmitter:sodium symporter activity (GO_REF:0000002 [IEA] InterPro:IPR000175|InterPro:IPR002435) /// 0005334 // norephinephrine:sodium symporter activity (PMID…	Transporter	B4DX48_HUMAN|hCG_2025341|SLC6A2	protein	taxon:9606	20130119	InterPro			0.0379304	0.275822	4	0	5335	19	19	2	2	1	0	0	0	0
TAS2R10 (NW_003571047 24051..24975)	0.354115	0.354115	0.354115	4.23388	4.23467	4.23467	4.23467	6.31812	4.23467e-06	6.31812	1.75424	0.0793888	1	1	4.23467e-06	6.31812	1.75424	0.0793888	1	1																0.109502	0.796272	1	1	924	0	1	0	1	0	0	0	0	0
TSACC	0.435689	0.435689	0.435689	4.23388	5.21017	5.21017	5.21017	6.31812	5.21017e-06	6.31812	1.94583	0.0516746	0.913715	1	5.21017e-06	6.31812	1.94584	0.0516746	0.913716	1	UniProtKB	Q96A04	TSACC			0005737 // cytoplasm (GO_REF:0000019 [IEA] Ensembl:ENSMUSP00000010682)	0051087 // chaperone binding (PMID:20829357 [IPI] UniProtKB:Q9BXA6)	TSSK6-activating co-chaperone protein	TSACC_HUMAN|TSACC|C1orf182	protein	taxon:9606	20130119	ENSEMBL			0.134726	0.9797	1	1	751	16	17	1	1	1	0	0	0	0
ANKFN1	0.134873	0.134873	0.134873	4.23388	1.61288	1.61288	1.61288	6.31812	1.61288e-06	6.31812	1.08263	0.278973	1	1	1.61288e-06	6.31812	1.08263	0.278973	1	1																0.0417063	0.303279	1	1	2426	581	689	1	1	1	0	0	0	0
AQPEP	0.0708077	0.0708077	0.0708077	4.23388	0.846751	0.846751	0.846751	6.31812	8.46751e-07	6.31812	0.784436	0.432785	1	1	8.46751e-07	6.31812	0.784436	0.432785	1	1	UniProtKB	Q6Q4G3, D6RB71	AQPEP		0006508 // proteolysis (GO_REF:0000002 [IEA] InterPro:IPR001930) /// 0006508 // proteolysis (GO_REF:0000037 [IEA] UniProtKB-KW:KW-0645)	0016021 // integral to membrane (GO_REF:0000037 [IEA] UniProtKB-KW:KW-0812)	0008270 // zinc ion binding (GO_REF:0000002 [IEA] InterPro:IPR014782) /// 0046872 // metal ion binding (GO_REF:0000037 [IEA] UniProtKB-KW:KW-0479) /// 0004222 // metalloendopeptidase activity (GO_REF:0000002 [IEA] InterPro:IPR001570)	Laeverin, isoform CRA_c	D6RB71_HUMAN|AQPEP|hCG_36969|FLJ90650	protein	taxon:9606	20130119	InterPro			0.0218956	0.15922	1	0	4621	41	41	1	1	1	0	0	1	1
COL20A1	0.0784282	0.0784282	0.0784282	4.23388	0.93788	0.93788	0.93788	6.31812	9.3788e-07	6.31812	0.825569	0.409049	1	1	9.3788e-07	6.31812	0.825569	0.409049	1	1	UniProtKB	Q9P218, B7ZBI5, B7ZBI4	COL20A1		0030198 // extracellular matrix organization (Reactome:REACT_118779 [TAS])	0005576 // extracellular region (Reactome:REACT_121366 [TAS]) /// 0005788 // endoplasmic reticulum lumen (Reactome:REACT_121254 [TAS]) /// 0005788 // endoplasmic reticulum lumen (Reactome:REACT_121366 [TAS]) /// 0005788 // endoplasmic reticulum lumen (Reactome:REACT_120939 [TAS]) /// 0031012 // extracellular matrix (PMID:22261194 [TAS]) /// 0005581 // collagen (GO_REF:0000037 [IEA] UniProtKB-KW:K…		Collagen alpha-1(XX) chain	B7ZBI4_HUMAN|COL20A1	protein	taxon:9606	20130119	UniProtKB			0.024252	0.176355	1	1	4172	17	18	1	1	1	0	0	0	0
COLQ	0.0972081	0.0972081	0.0972081	4.23388	1.16246	1.16246	1.16246	6.31812	1.16246e-06	6.31812	0.919112	0.358037	1	1	1.16246e-06	6.31812	0.919112	0.358037	1	1	UniProtKB	Q9Y215	COLQ		0001507 // acetylcholine catabolic process in synaptic cleft (PMID:9689136 [TAS]) /// 0008105 // asymmetric protein localization (PMID:9689136 [TAS])	0030054 // cell junction (GO_REF:0000037 [IEA] UniProtKB-KW:KW-0965) /// 0005615 // extracellular space (PMID:9689136 [TAS]) /// 0005581 // collagen (GO_REF:0000037 [IEA] UniProtKB-KW:KW-0176) /// 0005605 // basal lamina (PMID:9689136 [TAS]) /// 0043083 // synaptic cleft (PMID:9689136 [TAS])	0005515 // protein binding (PMID:15526038 [IPI] UniProtKB:P22303) /// 0008201 // heparin binding (GO_REF:0000019 [IEA] Ensembl:ENSRNOP00000057801)	Acetylcholinesterase collagenic tail peptide	COLQ_HUMAN|COLQ	protein	taxon:9606	20030904	PINC			0.0300592	0.218584	3	0	3366	301	432	1	1	1	1	1	0	0
CRLF1	0.181376	0.181376	0.181376	4.23388	2.16898	2.16898	2.16898	6.31812	2.16898e-06	6.31812	1.25547	0.209307	1	1	2.16898e-06	6.31812	1.25547	0.209307	1	1	UniProtKB	O75462	CRLF1		0043524 // negative regulation of neuron apoptosis (PMID:10966616 [IDA]) /// 0042517 // positive regulation of tyrosine phosphorylation of Stat3 protein (PMID:10966616 [IDA]) /// 2000672 /// 0001657 // ureteric bud development (GO_REF:0000019 [IEA] Ensembl:ENSMUSP00000008032) /// 0008284 // positive regulation of cell proliferation (PMID:10966616 [IDA])	0005737 // cytoplasm (PMID:18029348 [IDA]) /// 0097058 /// 0005615 // extracellular space (PMID:9686600 [TAS]) /// 0005886 // plasma membrane (PMID:18029348 [IDA])	0004872 // receptor activity (PMID:9686600 [TAS]) /// 0019955 // cytokine binding (PMID:15034937 [IPI] UniProtKB:Q9UBD9) /// 0005127 // ciliary neurotrophic factor receptor binding (PMID:10966616 [IDA]) /// 0005515 // protein binding (PMID:10966616 [IPI] UniProtKB:Q9UBD9) /// 0046982 // protein heterodimerization activity (PMID:10966616 [IDA]) /// 0005125 // cytokine activity (PMID:10966616 [IDA])	Cytokine receptor-like factor 1	CRLF1_HUMAN|UNQ288/PRO327|CRLF1	protein	taxon:9606	20130119	ENSEMBL			0.0560861	0.407846	1	1	1804	14	14	1	1	1	0	0	0	0
DCD	0.632887	0.632887	0.632887	4.23388	7.56835	7.56835	7.56835	6.31812	7.56835e-06	6.31812	2.34521	0.0190166	0.493612	1	7.56835e-06	6.31812	2.34521	0.0190165	0.493611	1	UniProtKB	P81605	DCD		0050832 // defense response to fungus (GO_REF:0000037 [IEA] UniProtKB-KW:KW-0295) /// 0006508 // proteolysis (GO_REF:0000037 [IEA] UniProtKB-KW:KW-0645) /// 0042742 // defense response to bacterium (GO_REF:0000037 [IEA] UniProtKB-KW:KW-0044) /// 0031640 // killing of cells of another organism (GO_REF:0000037 [IEA] UniProtKB-KW:KW-0295)	0005576 // extracellular region (PMID:9736629 [IDA])	0008233 // peptidase activity (GO_REF:0000037 [IEA] UniProtKB-KW:KW-0645)	Dermcidin	DCD_HUMAN|DCD|AIDD|DSEP	protein	taxon:9606	20010828	UniProtKB			0.195705	1.42312	1	1	517	7	8	0	1	0	0	0	0	0
ELN (NT_007933 11475269..11517080)	0.093808	0.093808	0.093808	4.23388	1.1218	1.1218	1.1218	6.31812	1.1218e-06	6.31812	0.902895	0.366582	1	1	1.1218e-06	6.31812	0.902895	0.366582	1	1																0.0290079	0.210939	5	0	3488	0	16	0	1	0	0	0	0	1
GPSM1 (NW_003315927 18380..49281)	0.275037	0.275037	0.275037	4.23388	3.28902	3.28902	3.28902	6.31812	3.28902e-06	6.31812	1.54601	0.122102	1	1	3.28902e-06	6.31812	1.54601	0.122102	1	1																0.0850485	0.618455	4	1	3569	2	16	0	3	0	0	0	0	1
IL3RA (NT_167196 141274..187348)	0.191346	0.191346	0.191346	4.23388	2.28821	2.28821	2.28821	6.31812	2.28821e-06	6.31812	1.28952	0.197218	1	1	2.28821e-06	6.31812	1.28952	0.197218	1	1																0.0591692	0.430266	2	0	1710	0	30	0	1	0	0	0	0	0
JAKMIP2	0.0705786	0.0705786	0.0705786	4.23388	0.844011	0.844011	0.844011	6.31812	8.44011e-07	6.31812	0.783166	0.43353	1	1	8.44011e-07	6.31812	0.783166	0.43353	1	1	UniProtKB	Q96AA8, B4DSG0, G5E9Y0	JAKMIP2			0005794 // Golgi apparatus (GO_REF:0000039 [IEA] UniProtKB-SubCell:SL-0132)	0008017 // microtubule binding (GO_REF:0000002 [IEA] InterPro:IPR024836) /// 0016301 // kinase activity (GO_REF:0000038 [IEA] UniProtKB-KW:KW-0418) /// 0019900 // kinase binding (GO_REF:0000002 [IEA] InterPro:IPR024836)	Janus kinase and microtubule-interacting protein 2	B4DSG0_HUMAN|JAKMIP2	protein	taxon:9606	20130119	InterPro			0.0218247	0.158705	3	0	9272	73	156	1	2	0.5	1	1	0	0
LPAR4	0.249107	0.249107	0.249107	4.23388	2.97894	2.97894	2.97894	6.31812	2.97894e-06	6.31812	1.47133	0.141201	1	1	2.97894e-06	6.31812	1.47133	0.141201	1	1	UniProtKB	Q99677	LPAR4		0007186 // G-protein coupled receptor protein signaling pathway (PMID:9073069 [TAS])	0005886 // plasma membrane (Reactome:REACT_18317 [TAS]) /// 0005886 // plasma membrane (Reactome:REACT_15291 [TAS]) /// 0005887 // integral to plasma membrane (PMID:9073069 [TAS]) /// 0005886 // plasma membrane (Reactome:REACT_22263 [TAS]) /// 0005886 // plasma membrane (Reactome:REACT_22436 [TAS])	0004930 // G-protein coupled receptor activity (PMID:9073069 [TAS]) /// 0008289 // lipid binding (GO_REF:0000037 [IEA] UniProtKB-KW:KW-0446) /// 0045028 // purinergic nucleotide receptor activity, G-protein coupled (GO_REF:0000002 [IEA] InterPro:IPR002188)	Lysophosphatidic acid receptor 4	LPAR4_HUMAN|LPAR4|GPR23|LPA4|P2RY9	protein	taxon:9606	20030904	PINC			0.0770304	0.560148	1	1	2627	4	4	2	2	1	0	0	0	0
MMP23B	0.263873	0.263873	0.263873	4.23388	3.15551	3.15551	3.15551	6.31812	3.15551e-06	6.31812	1.51431	0.129947	1	1	3.15551e-06	6.31812	1.51431	0.129947	1	1	UniProtKB	B4DMZ6, H0Y6I4	MMP23B		0006508 // proteolysis (GO_REF:0000038 [IEA] UniProtKB-KW:KW-0645)	0031012 // extracellular matrix (GO_REF:0000002 [IEA] InterPro:IPR001818) /// 0031012 // extracellular matrix (GO_REF:0000002 [IEA] InterPro:IPR001818|InterPro:IPR021190)	0008270 // zinc ion binding (GO_REF:0000002 [IEA] InterPro:IPR001818|InterPro:IPR006026|InterPro:IPR021190) /// 0008270 // zinc ion binding (GO_REF:0000002 [IEA] InterPro:IPR001818|InterPro:IPR006026) /// 0046872 // metal ion binding (GO_REF:0000038 [IEA] UniProtKB-KW:KW-0479) /// 0004222 // metalloendopeptidase activity (GO_REF:0000002 [IEA] InterPro:IPR001818|InterPro:IPR021190) /// 0004222 // …	Matrix metalloproteinase-23, soluble form	B4DMZ6_HUMAN|MMP23B	protein	taxon:9606	20130119	InterPro			0.0815963	0.593351	1	1	1240	1	2	0	1	0	0	0	0	0
MS4A2	0.0896936	0.0896936	0.0896936	4.23388	1.0726	1.0726	1.0726	6.31812	1.0726e-06	6.31812	0.882872	0.377305	1	1	1.0726e-06	6.31812	0.882873	0.377305	1	1	UniProtKB	E9PLJ1, Q01362	MS4A2		0043306 // positive regulation of mast cell degranulation (GO_REF:0000019 [IEA] Ensembl:ENSRNOP00000028491) /// 0051279 // regulation of release of sequestered calcium ion into cytosol (GO_REF:0000019 [IEA] Ensembl:ENSRNOP00000028491) /// 0007186 // G-protein coupled receptor protein signaling pathway (PMID:9169438 [TAS]) /// 0008283 // cell proliferation (PMID:2448768 [TAS]) /// 0007205 // activ…	0032998 // Fc-epsilon receptor I complex (GO_REF:0000019 [IEA] Ensembl:ENSMUSP00000127373) /// 0005887 // integral to plasma membrane (GO_REF:0000019 [IEA] Ensembl:ENSMUSP00000127373) /// 0005768 // endosome (GO_REF:0000019 [IEA] Ensembl:ENSRNOP00000028491) /// 0045121 // membrane raft (GO_REF:0000019 [IEA] Ensembl:ENSRNOP00000028491) /// 0005887 // integral to plasma membrane (GO_REF:0000019 [IE…	0019901 // protein kinase binding (GO_REF:0000019 [IEA] Ensembl:ENSRNOP00000028491) /// 0019767 // IgE receptor activity (GO_REF:0000019 [IEA] Ensembl:ENSRNOP00000028491) /// 0005262 // calcium channel activity (PMID:9169438 [TAS]) /// 0051219 // phosphoprotein binding (GO_REF:0000019 [IEA] Ensembl:ENSRNOP00000028491) /// 0042169 // SH2 domain binding (GO_REF:0000019 [IEA] Ensembl:ENSRNOP00000028…	High affinity immunoglobulin epsilon receptor subunit beta	E9PLJ1_HUMAN|MS4A2	protein	taxon:9606	20130119	ENSEMBL			0.0277356	0.201687	2	0	3648	1	1	1	1	1	0	0	0	0
NLRP9	0.0939157	0.0939157	0.0939157	4.23388	1.12309	1.12309	1.12309	6.31812	1.12309e-06	6.31812	0.903413	0.366307	1	1	1.12309e-06	6.31812	0.903413	0.366307	1	1	UniProtKB	Q7RTR0	NLRP9			0005737 // cytoplasm (GO_REF:0000039 [IEA] UniProtKB-SubCell:SL-0086)	0005524 // ATP binding (GO_REF:0000037 [IEA] UniProtKB-KW:KW-0067)	NACHT, LRR and PYD domains-containing protein 9	NALP9_HUMAN|NLRP9|NALP9|NOD6|PAN12	protein	taxon:9606	20130119	UniProtKB			0.0290412	0.211181	1	1	3484	29	30	1	1	1	1	1	0	0
NXF3	0.172575	0.172575	0.172575	4.23388	2.06373	2.06373	2.06373	6.31812	2.06373e-06	6.31812	1.22463	0.220713	1	1	2.06373e-06	6.31812	1.22463	0.220713	1	1	UniProtKB	B4DYS7, Q9H4D5, H0Y6A1, E9PE86	NXF3		0006406 // mRNA export from nucleus (PMID:11545741 [IDA]) /// 0006406 // mRNA export from nucleus (GO_REF:0000002 [IEA] InterPro:IPR015245) /// 0006810 // transport (GO_REF:0000002 [IEA] InterPro:IPR002075) /// 0016973 // poly(A)+ mRNA export from nucleus (GO_REF:0000019 [IEA] Ensembl:ENSMUSP00000079730)	0005634 // nucleus (PMID:11545741 [IDA]) /// 0005634 // nucleus (GO_REF:0000002 [IEA] InterPro:IPR015245) /// 0005737 // cytoplasm (PMID:18029348 [IDA]) /// 0005737 // cytoplasm (PMID:11545741 [IDA]) /// 0005622 // intracellular (GO_REF:0000002 [IEA] InterPro:IPR002075) /// 0042272 // nuclear RNA export factor complex (PMID:11545741 [IDA])	0005515 // protein binding (PMID:11545741 [IPI] UniProtKB:P52594) /// 0005515 // protein binding (PMID:11545741 [IPI] UniProtKB:O14980) /// 0005515 // protein binding (PMID:19060904 [IPI] UniProtKB:Q9UKK6) /// 0005515 // protein binding (PMID:16189514 [IPI] UniProtKB:Q9UKK6) /// 0005515 // protein binding (PMID:11545741 [IPI] UniProtKB:P35658) /// 0003729 // mRNA binding (GO_REF:0000019 [IEA] Ens…	cDNA FLJ59101, highly similar to Nuclear RNA export factor 3	B4DYS7_HUMAN|NXF3	protein	taxon:9606	20130119	InterPro			0.0533647	0.388056	1	0	1896	15	24	1	1	1	0	0	1	1
TMEM56	0.0474275	0.0474275	0.0474275	4.23388	0.56716	0.56716	0.56716	6.31812	5.6716e-07	6.31812	0.641996	0.520876	1	1	5.6716e-07	6.31812	0.641996	0.520876	1	1	UniProtKB	C9J6J2, C9JJM2, Q96MV1	TMEM56		0008150 // biological_process (GO_REF:0000015 [ND])	0016021 // integral to membrane (GO_REF:0000002 [IEA] InterPro:IPR006634) /// 0016021 // integral to membrane (GO_REF:0000037 [IEA] UniProtKB-KW:KW-0812) /// 0005575 // cellular_component (GO_REF:0000015 [ND])	0003674 // molecular_function (GO_REF:0000015 [ND])	Transmembrane protein 56	C9J6J2_HUMAN|TMEM56	protein	taxon:9606	20130119	InterPro			0.0146658	0.106647	2	1	6899	1	2	1	1	1	0	0	0	0
UGT2B7	0.173398	0.173398	0.173398	4.23388	2.07358	2.07358	2.07358	6.31812	2.07358e-06	6.31812	1.22755	0.219616	1	1	2.07358e-06	6.31812	1.22755	0.219616	1	1	UniProtKB	E9PBP8, D6RH08, P16662	UGT2B7		0052695 /// 0008209 // androgen metabolic process (PMID:17442341 [IDA]) /// 0006629 // lipid metabolic process (PMID:2159463 [TAS])	0016020 // membrane (PMID:2159463 [TAS]) /// 0005789 // endoplasmic reticulum membrane (GO_REF:0000039 [IEA] UniProtKB-SubCell:SL-0097) /// 0016021 // integral to membrane (GO_REF:0000037 [IEA] UniProtKB-KW:KW-0812)	0016758 // transferase activity, transferring hexosyl groups (GO_REF:0000002 [IEA] InterPro:IPR002213) /// 0015020 // glucuronosyltransferase activity (PMID:20056724 [IDA]) /// 0015020 // glucuronosyltransferase activity (PMID:18052087 [IDA]) /// 0015020 // glucuronosyltransferase activity (PMID:17442341 [IDA]) /// 0001972 // retinoic acid binding (PMID:20308471 [IDA])	UDP-glucuronosyltransferase 2B7	D6RH08_HUMAN|UGT2B7	protein	taxon:9606	20130119	InterPro			0.0536192	0.389907	1	1	1887	6	7	1	1	1	0	0	0	0
ZNF469	0.0495649	0.0495649	0.0495649	4.23388	0.592719	0.592719	0.592719	6.31812	5.92719e-07	6.31812	0.656302	0.51163	1	1	5.92719e-07	6.31812	0.656302	0.51163	1	1	UniProtKB	Q96JG9, H3BS19	ZNF469		0006355 // regulation of transcription, DNA-dependent (GO_REF:0000037 [IEA] UniProtKB-KW:KW-0805) /// 0006351 // transcription, DNA-dependent (GO_REF:0000037 [IEA] UniProtKB-KW:KW-0804)	0005634 // nucleus (GO_REF:0000039 [IEA] UniProtKB-SubCell:SL-0191) /// 0005622 // intracellular (GO_REF:0000002 [IEA] InterPro:IPR015880)	0046872 // metal ion binding (GO_REF:0000037 [IEA] UniProtKB-KW:KW-0479) /// 0003677 // DNA binding (GO_REF:0000037 [IEA] UniProtKB-KW:KW-0238) /// 0008270 // zinc ion binding (GO_REF:0000002 [IEA] InterPro:IPR007087|InterPro:IPR015880)	Zinc finger protein 469	H3BS19_HUMAN|ZNF469	protein	taxon:9606	20130119	InterPro			0.0153267	0.111453	1	1	13203	2	2	2	2	1	0	0	0	0
CASKIN1	0.172363	0.172363	0.172363	4.23388	2.0612	2.0612	2.0612	6.31812	2.0612e-06	6.31812	1.22388	0.220997	1	1	2.0612e-06	6.31812	1.22388	0.220997	1	1	UniProtKB	Q8WXD9	CASKIN1		0007165 // signal transduction (PMID:12040031 [ISS] UniProtKB:Q8VHK2)	0005737 // cytoplasm (PMID:12040031 [ISS] UniProtKB:Q8VHK2)	0019904 // protein domain specific binding (GO_REF:0000019 [IEA] Ensembl:ENSRNOP00000004486)	Caskin-1	CSKI1_HUMAN|KIAA1306|CASKIN1	protein	taxon:9606	20050609	UniProtKB			0.0532991	0.387579	1	1	5695	18	18	3	3	1	0	0	1	1
DPP6 (NT_007914 14180041..14859648)	0.222435	0.222435	0.222435	4.23388	2.65998	2.65998	2.65998	6.31812	2.65998e-06	6.31812	1.39033	0.164427	1	1	2.65998e-06	6.31812	1.39033	0.164427	1	1																0.0687827	0.500173	3	1	1471	582	735	1	1	1	0	0	0	0
IL23R	0.115783	0.115783	0.115783	4.23388	1.38458	1.38458	1.38458	6.31812	1.38458e-06	6.31812	1.00309	0.315818	1	1	1.38458e-06	6.31812	1.00309	0.315818	1	1	UniProtKB	Q5VWK5	IL23R		0006954 // inflammatory response (GO_REF:0000037 [IEA] UniProtKB-KW:KW-0395) /// 0002230 // positive regulation of defense response to virus by host (PMID:12421946 [IDA]) /// 0032735 // positive regulation of interleukin-12 production (PMID:20027291 [IDA]) /// 2000318 /// 0032729 // positive regulation of interferon-gamma production (PMID:19088061 [TAS]) /// 2000330 /// 0042102 // positive regula…	72536	0005143 // interleukin-12 receptor binding (PMID:12023369 [IPI] UniProtKB:P42701) /// 0042019 // interleukin-23 binding (PMID:12023369 [IPI] UniProtKB:Q9NPF7) /// 0042020 // interleukin-23 receptor activity (PMID:12023369 [IDA])	Interleukin-23 receptor	IL23R_HUMAN|IL23R	protein	taxon:9606	20110112	BHF-UCL			0.035803	0.260352	1	1	2826	92	99	1	1	1	0	0	0	0
IL31RA	0.0891317	0.0891317	0.0891317	4.23388	1.06588	1.06588	1.06588	6.31812	1.06588e-06	6.31812	0.880102	0.378804	1	1	1.06588e-06	6.31812	0.880102	0.378804	1	1	UniProtKB	Q8NI17	IL31RA		0042523 // positive regulation of tyrosine phosphorylation of Stat5 protein (PMID:11877449 [IEP]) /// 0043066 // negative regulation of apoptosis (PMID:11877449 [NAS]) /// 0030224 // monocyte differentiation (PMID:11877449 [IEP]) /// 0030225 // macrophage differentiation (PMID:11877449 [NAS]) /// 0043031 // negative regulation of macrophage activation (PMID:11877449 [NAS]) /// 0019221 // cytokine…	0005886 // plasma membrane (GO_REF:0000039 [IEA] UniProtKB-SubCell:SL-0039) /// 0016021 // integral to membrane (PMID:11877449 [NAS])	0019901 // protein kinase binding (PMID:11877449 [NAS]) /// 0004896 // cytokine receptor activity (PMID:11877449 [TAS]) /// 0019955 // cytokine binding (PMID:11877449 [NAS]) /// 0003713 // transcription coactivator activity (PMID:11877449 [NAS])	Interleukin-31 receptor subunit alpha	IL31R_HUMAN|IL31RA|UNQ6368/PRO21073/PRO21384|CRL3|GPL	protein	taxon:9606	20031216	UniProtKB			0.0275618	0.200424	5	1	3671	60	64	1	1	1	0	0	0	0
NCAM1 (NW_003871078 143972..461162)	0.076745	0.076745	0.076745	4.23388	0.917752	0.917752	0.917752	6.31812	9.17752e-07	6.31812	0.816662	0.414122	1	1	9.17752e-07	6.31812	0.816662	0.414122	1	1																0.0237315	0.172571	5	0	8527	0	112	0	2	0	0	0	0	0
NFATC4	0.108615	0.108615	0.108615	4.23388	1.29887	1.29887	1.29887	6.31812	1.29887e-06	6.31812	0.971543	0.331278	1	1	1.29887e-06	6.31812	0.971543	0.331278	1	1	UniProtKB	Q14934, G3V4U6, G3V4K1, G3V5H0	NFATC4		0006954 // inflammatory response (PMID:7749981 [TAS]) /// 0055001 // muscle cell development (GO_REF:0000019 [IEA] Ensembl:ENSMUSP00000024179) /// 0045333 // cellular respiration (GO_REF:0000019 [IEA] Ensembl:ENSMUSP00000024179) /// 0006366 // transcription from RNA polymerase II promoter (PMID:7749981 [TAS]) /// 0071285 /// 0051145 // smooth muscle cell differentiation (GO_REF:0000019 [IEA] Ense…	0005667 // transcription factor complex (GO_REF:0000019 [IEA] Ensembl:ENSMUSP00000024179) /// 0005737 // cytoplasm (PMID:18029348 [IDA]) /// 0005829 // cytosol (GO_REF:0000019 [IEA] Ensembl:ENSMUSP00000024179) /// 0005634 // nucleus (GO_REF:0000002 [IEA] InterPro:IPR011539) /// 0045111 // intermediate filament cytoskeleton (PMID:18029348 [IDA])	0000981 /// 0003700 // transcription factor activity (GO_REF:0000002 [IEA] InterPro:IPR008366|InterPro:IPR008967|InterPro:IPR011539) /// 0003713 // transcription coactivator activity (PMID:7749981 [TAS]) /// 0003677 // DNA binding (GO_REF:0000019 [IEA] Ensembl:ENSMUSP00000024179) /// 0003700 // transcription factor activity (GO_REF:0000002 [IEA] InterPro:IPR008366)	Nuclear factor of-activated T-cells, cytoplasmic 4	G3V4K1_HUMAN|NFATC4	protein	taxon:9606	20130119	ENSEMBL			0.0335865	0.244234	5	0	6025	7	7	2	2	1	0	0	0	0
MAPK10	0.070823	0.070823	0.070823	4.23388	0.846934	0.846934	0.846934	6.31812	8.46934e-07	6.31812	0.784521	0.432735	1	1	8.46934e-07	6.31812	0.784521	0.432735	1	1	UniProtKB	D6R9C1, D6RDG1, D6RBH2, Q499Y8, P53779, D6RCB1, H0Y9H3, A8MPV1, D6RAU3, D6RC26, D6RJF9, D6RFX8, D6RAJ0, D6RFZ7, A8MWW6	MAPK10		0045087 // innate immune response (Reactome:REACT_6802 [TAS]) /// 0034134 // toll-like receptor 2 signaling pathway (Reactome:REACT_7980 [TAS]) /// 0002755 // MyD88-dependent toll-like receptor signaling pathway (Reactome:REACT_6788 [TAS]) /// 0007254 // JNK cascade (PMID:8654373 [ISS] UniProtKB:P45983) /// 0002224 // toll-like receptor signaling pathway (Reactome:REACT_8006 [TAS]) /// 0000187 //…	0005886 // plasma membrane (GO_REF:0000019 [IEA] Ensembl:ENSMUSP00000108468) /// 0005829 // cytosol (Reactome:REACT_21385 [TAS]) /// 0005654 // nucleoplasm (Reactome:REACT_6716 [TAS]) /// 0005737 // cytoplasm (GO_REF:0000024 [ISS] UniProtKB:Q61831) /// 0005654 // nucleoplasm (Reactome:REACT_6719 [TAS]) /// 0005739 // mitochondrion (GO_REF:0000024 [ISS] UniProtKB:Q61831) /// 0005654 // nucleoplasm…	0004705 // JUN kinase activity (GO_REF:0000019 [IEA] Ensembl:ENSRNOP00000057862) /// 0005524 // ATP binding (GO_REF:0000002 [IEA] InterPro:IPR000719) /// 0004672 // protein kinase activity (GO_REF:0000002 [IEA] InterPro:IPR000719) /// 0004707 // MAP kinase activity (GO_REF:0000002 [IEA] InterPro:IPR003527|InterPro:IPR008351) /// 0005524 // ATP binding (GO_REF:0000038 [IEA] UniProtKB-KW:KW-0067) /…	Mitogen-activated protein kinase 10	A8MPV1_HUMAN|MAPK10	protein	taxon:9606	20130119	InterPro			0.0219003	0.159254	4	0	4620	349	394	1	1	1	0	0	0	0
PLGLB2	0.108489	0.108489	0.108489	4.23388	1.29736	1.29736	1.29736	6.31812	1.29736e-06	6.31812	0.970979	0.331559	1	1	1.29736e-06	6.31812	0.970979	0.331559	1	1	UniProtKB	Q02325	PLGLB2			0005576 // extracellular region (GO_REF:0000039 [IEA] UniProtKB-SubCell:SL-0243)		Plasminogen-like protein B	PLGB_HUMAN|PLGLB2|PLGP1|PLGLB1|PLGL|PRGB	protein	taxon:9606	20130119	UniProtKB			0.0335475	0.243951	1	1	3016	4	13	0	1	0	0	0	0	0
DRP2	0.769425	0.769425	0.769425	4.18407	9.21446	9.21446	9.21446	6.24379	9.21446e-06	6.24379	2.58271	0.00980271	0.318783	1	9.21446e-06	6.24379	2.58272	0.0098027	0.318782	1	UniProtKB	Q13474	DRP2		0007417 // central nervous system development (PMID:8640231 [TAS])	0005737 // cytoplasm (GO_REF:0000037 [IEA] UniProtKB-KW:KW-0963) /// 0005886 // plasma membrane (GO_REF:0000019 [IEA] Ensembl:ENSMUSP00000115246) /// 0005856 // cytoskeleton (GO_REF:0000039 [IEA] UniProtKB-SubCell:SL-0090)	0008270 // zinc ion binding (GO_REF:0000002 [IEA] InterPro:IPR000433) /// 0005509 // calcium ion binding (GO_REF:0000002 [IEA] InterPro:IPR011992)	Dystrophin-related protein 2	DRP2_HUMAN|DRP2	protein	taxon:9606	20130119	InterPro			0.241648	1.75721	2	0	7118	65	65	17	17	1	1	1	0	0
FGF16 (NW_003871101 4936..13784)	1.96015	1.96015	1.96015	4.02219	23.5924	23.5924	23.5924	6.00222	2.35924e-05	6.00222	4.10537	4.03662e-05	0.00437074	1	2.35924e-05	6.00222	4.10539	4.03656e-05	0.00437067	1																0.648586	4.71638	1	0	624	2	14	0	4	0	0	0	0	4
PPP1R3C	8.23577	8.23577	8.23577	3.99195	99.2243	99.2243	99.2243	5.95709	9.92243e-05	5.95709	8.4086	0	0	0	9.92243e-05	5.95709	8.40875	0	0	0	UniProtKB	Q9UQK1	PPP1R3C		0005979 // regulation of glycogen biosynthetic process (GO_REF:0000019 [IEA] Ensembl:ENSRNOP00000024941) /// 0005978 // glycogen biosynthetic process (GO_REF:0000019 [IEA] Ensembl:ENSMUSP00000084578) /// 0005981 // regulation of glycogen catabolic process (GO_REF:0000019 [IEA] Ensembl:ENSRNOP00000024941)	0042587 // glycogen granule (GO_REF:0000019 [IEA] Ensembl:ENSRNOP00000024941)	0005515 // protein binding (PMID:14532330 [IPI] UniProtKB:O95278) /// 0004722 // protein serine/threonine phosphatase activity (PMID:8985175 [TAS]) /// 0019903 // protein phosphatase binding (GO_REF:0000019 [IEA] Ensembl:ENSMUSP00000084578) /// 0005515 // protein binding (PMID:18070875 [IPI] UniProtKB:O95278)	Protein phosphatase 1 regulatory subunit 3C	PPR3C_HUMAN|PPP1R3C|PPP1R5	protein	taxon:9606	20070906	PINC			2.75265	20.0167	1	1	2573	81	82	70	70	1	0	0	0	0
HIC1	0.280504	0.280504	0.280504	3.95162	3.38409	3.38409	3.38409	5.89692	3.38409e-06	5.89692	1.55008	0.121121	1	1	3.38409e-06	5.89692	1.55009	0.121121	1	1	UniProtKB	Q14526, I3L388	HIC1		0006355 // regulation of transcription, DNA-dependent (PMID:7585125 [TAS]) /// 0000122 // negative regulation of transcription from RNA polymerase II promoter (GO_REF:0000024 [ISS] UniProtKB:Q9R1Y5) /// 0006351 // transcription, DNA-dependent (GO_REF:0000037 [IEA] UniProtKB-KW:KW-0804) /// 0007275 // multicellular organismal development (GO_REF:0000029 [NAS]) /// 0043517 // positive regulation of…	0005634 // nucleus (PMID:18029348 [IDA]) /// 0005737 // cytoplasm (PMID:18029348 [IDA]) /// 0000785 // chromatin (GO_REF:0000019 [IEA] Ensembl:ENSMUSP00000053483) /// 0005634 // nucleus (GO_REF:0000029 [NAS]) /// 0005730 // nucleolus (PMID:18029348 [IDA]) /// 0000785 // chromatin (GO_REF:0000024 [ISS] UniProtKB:Q9R1Y5)	0005515 // protein binding (PMID:19486893 [IPI] UniProtKB:P56545) /// 0005515 // protein binding (PMID:19486893 [IPI] UniProtKB:Q13363) /// 0003700 // transcription factor activity (PMID:7585125 [TAS]) /// 0008270 // zinc ion binding (GO_REF:0000002 [IEA] InterPro:IPR007087|InterPro:IPR015880) /// 0043565 // sequence-specific DNA binding (PMID:15231840 [IDA]) /// 0005515 // protein binding (PMID:…	Hypermethylated in cancer 1 protein	I3L388_HUMAN|HIC1	protein	taxon:9606	20130119	ENSEMBL			0.0950339	0.691066	2	0	3194	4	4	3	3	1	0	0	0	0
IL15	0.383696	0.383696	0.383696	3.95162	4.62903	4.62903	4.62903	5.89692	4.62903e-06	5.89692	1.81292	0.0698435	1	1	4.62903e-06	5.89692	1.81293	0.0698435	1	1	UniProtKB	P40933	IL15		0045062 // extrathymic T cell selection (GO_REF:0000019 [IEA] Ensembl:ENSMUSP00000034148) /// 0045580 // regulation of T cell differentiation (GO_REF:0000019 [IEA] Ensembl:ENSMUSP00000034148) /// 0042517 // positive regulation of tyrosine phosphorylation of Stat3 protein (GO_REF:0000019 [IEA] Ensembl:ENSRNOP00000004590) /// 0034105 // positive regulation of tissue remodeling (PMID:16482511 [IC] G…	0005615 // extracellular space (GO_REF:0000019 [IEA] Ensembl:ENSRNOP00000004590) /// 0005794 // Golgi apparatus (PMID:10851076 [TAS]) /// 0016020 // membrane (PMID:10851076 [TAS]) /// 0005768 // endosome (PMID:10851076 [TAS]) /// 0005887 // integral to plasma membrane (PMID:10851076 [TAS]) /// 0005634 // nucleus (GO_REF:0000039 [IEA] UniProtKB-SubCell:SL-0191) /// 0005737 // cytoplasm (PMID:10851…	0005515 // protein binding (PMID:16284400 [IPI] UniProtKB:Q13261) /// 0005126 // cytokine receptor binding (GO_REF:0000002 [IEA] InterPro:IPR003443) /// 0005125 // cytokine activity (GO_REF:0000019 [IEA] Ensembl:ENSMUSP00000034148)	Interleukin-15	IL15_HUMAN|IL15	protein	taxon:9606	20130119	ENSEMBL			0.129995	0.945296	2	0	2335	104	109	3	3	1	1	1	0	0
PRKCB	0.111796	0.111796	0.111796	3.95162	1.34874	1.34874	1.34874	5.89692	1.34874e-06	5.89692	0.978584	0.327786	1	1	1.34874e-06	5.89692	0.978584	0.327786	1	1	UniProtKB	I3L1Z0, I3L148, H3BV73, P05771	PRKCB		0045766 // positive regulation of angiogenesis (GO_REF:0000024 [ISS] UniProtKB:P68404) /// 0006351 // transcription, DNA-dependent (GO_REF:0000037 [IEA] UniProtKB-KW:KW-0804) /// 0035556 /// 0043123 // positive regulation of I-kappaB kinase/NF-kappaB cascade (GO_REF:0000024 [ISS] UniProtKB:P68404) /// 0050861 // positive regulation of B cell receptor signaling pathway (GO_REF:0000019 [IEA] Ensemb…	0005886 // plasma membrane (Reactome:REACT_18308 [TAS]) /// 0005829 // cytosol (Reactome:REACT_286 [TAS]) /// 0005737 // cytoplasm (PMID:15632189 [IDA]) /// 0005886 // plasma membrane (Reactome:REACT_118598 [TAS]) /// 0005886 // plasma membrane (Reactome:REACT_118748 [TAS]) /// 0005886 // plasma membrane (Reactome:REACT_18330 [TAS]) /// 0005886 // plasma membrane (Reactome:REACT_286 [TAS]) /// 00…	0005524 // ATP binding (GO_REF:0000002 [IEA] InterPro:IPR000961) /// 0005515 // protein binding (PMID:20228790 [IPI] UniProtKB:O60341) /// 0005524 // ATP binding (GO_REF:0000002 [IEA] InterPro:IPR000719) /// 0004674 // protein serine/threonine kinase activity (Reactome:REACT_118598 [TAS]) /// 0035403 /// 0004697 // protein kinase C activity (GO_REF:0000019 [IEA] Ensembl:ENSMUSP00000070019) /// 00…	Protein kinase C beta type	H3BV73_HUMAN|PRKCB	protein	taxon:9606	20130119	InterPro			0.037876	0.275426	2	1	8014	362	412	3	3	1	0	0	1	1
MYL1	0.778393	0.778393	0.778393	3.95162	9.39078	9.39078	9.39078	5.89692	9.39078e-06	5.89692	2.58218	0.00981789	0.318783	1	9.39078e-06	5.89692	2.58218	0.00981788	0.318782	1	UniProtKB	P05976	MYL1		0060048 // cardiac muscle contraction (GO_REF:0000019 [IEA] Ensembl:ENSRNOP00000017838) /// 0030049 // muscle filament sliding (PMID:3904738 [NAS]) /// 0006936 // muscle contraction (PMID:8145163 [IDA]) /// 0030049 // muscle filament sliding (Reactome:REACT_16969 [TAS]) /// 0007517 // muscle organ development (GO_REF:0000029 [NAS])	0030016 // myofibril (PMID:8145163 [IDA]) /// 0030017 // sarcomere (PMID:3904738 [NAS]) /// 0005829 // cytosol (Reactome:REACT_16902 [TAS]) /// 0005829 // cytosol (Reactome:REACT_16935 [TAS]) /// 0005829 // cytosol (Reactome:REACT_16995 [TAS]) /// 0005859 // muscle myosin complex (PMID:3904738 [NAS]) /// 0005829 // cytosol (Reactome:REACT_17057 [TAS])	0008307 // structural constituent of muscle (PMID:3904738 [NAS]) /// 0005509 // calcium ion binding (GO_REF:0000002 [IEA] InterPro:IPR002048|InterPro:IPR011992)	Myosin light chain 1/3, skeletal muscle isoform	MYL1_HUMAN|MYL1	protein	taxon:9606	20130119	InterPro			0.263717	1.91769	2	1	1151	11	11	3	3	1	0	0	0	0
AMY1C	0.305768	0.305768	0.305768	3.81049	3.7075	3.7075	3.7075	5.68631	3.7075e-06	5.68631	1.61199	0.106963	1	1	3.7075e-06	5.68631	1.612	0.106963	1	1																0.108795	0.791134	1	1	1860	1	3	0	2	0	0	0	0	1
ANO9	0.197819	0.197819	0.197819	3.81049	2.39859	2.39859	2.39859	5.68631	2.39859e-06	5.68631	1.29658	0.194774	1	1	2.39859e-06	5.68631	1.29659	0.194774	1	1	UniProtKB	A1A5B4	ANO9	NOT		0005886 // plasma membrane (GO_REF:0000039 [IEA] UniProtKB-SubCell:SL-0039) /// 0016021 // integral to membrane (GO_REF:0000037 [IEA] UniProtKB-KW:KW-0812) /// 0005622 // intracellular (GO_REF:0000019 [IEA] Ensembl:ENSMUSP00000067689)	0005229 // intracellular calcium activated chloride channel activity (PMID:21984732 [IDA]) /// 0005229 // intracellular calcium activated chloride channel activity (PMID:22178883 [IDA])	Anoctamin-9	ANO9_HUMAN|ANO9|PIG5|TMEM16J|TP53I5	protein	taxon:9606	20121119	UniProtKB			0.0703857	0.51183	1	0	2875	131	139	2	2	1	0	0	2	2
C16orf95	0.489861	0.489861	0.489861	3.81049	5.93967	5.93967	5.93967	5.68631	5.93967e-06	5.68631	2.04035	0.0413157	0.800793	1	5.93967e-06	5.68631	2.04035	0.0413157	0.800792	1	UniProtKB	H3BMH7	C16orf95		0031571 // G1 DNA damage checkpoint (GO_REF:0000002 [IEA] InterPro:IPR026941) /// 0031146 // SCF-dependent proteasomal ubiquitin-dependent protein catabolic process (GO_REF:0000002 [IEA] InterPro:IPR026941)	0019005 // SCF ubiquitin ligase complex (GO_REF:0000002 [IEA] InterPro:IPR026941)	0030332 // cyclin binding (GO_REF:0000002 [IEA] InterPro:IPR026941)	Uncharacterized protein C16orf95	H3BMH7_HUMAN|C16orf95	protein	taxon:9606	20130119	InterPro			0.174297	1.26745	3	0	1161	16	16	2	2	1	0	0	0	0
CXorf26 (NW_003871100 192355..197618)	0.475923	0.475923	0.475923	3.81049	5.77067	5.77067	5.77067	5.68631	5.77067e-06	5.68631	2.01111	0.0443136	0.835025	1	5.77067e-06	5.68631	2.01111	0.0443135	0.835025	1																0.169338	1.23139	1	1	1195	1	3	1	2	0.5	1	1	0	0
GRID1	0.0972351	0.0972351	0.0972351	3.81049	1.179	1.179	1.179	5.68631	1.179e-06	5.68631	0.909031	0.363334	1	1	1.179e-06	5.68631	0.909031	0.363334	1	1	UniProtKB	B7Z7L0, Q9ULK0, G3V186	GRID1			0030054 // cell junction (GO_REF:0000038 [IEA] UniProtKB-KW:KW-0965) /// 0005886 // plasma membrane (GO_REF:0000038 [IEA] UniProtKB-KW:KW-1003) /// 0045211 // postsynaptic membrane (GO_REF:0000039 [IEA] UniProtKB-SubCell:SL-0219) /// 0030054 // cell junction (GO_REF:0000037 [IEA] UniProtKB-KW:KW-0965) /// 0045211 // postsynaptic membrane (GO_REF:0000038 [IEA] UniProtKB-KW:KW-0628) /// 0030288 // …	0005234 // extracellular-glutamate-gated ion channel activity (GO_REF:0000002 [IEA] InterPro:IPR001320|InterPro:IPR001508|InterPro:IPR019594) /// 0004970 // ionotropic glutamate receptor activity (GO_REF:0000002 [IEA] InterPro:IPR001320|InterPro:IPR019594)	cDNA FLJ50913, highly similar to Glutamate receptor delta-1 subunit	B7Z7L0_HUMAN|GRID1	protein	taxon:9606	20130119	InterPro			0.0345972	0.251583	1	1	5849	399	467	0	2	0	0	0	0	0
DCC	0.0557031	0.0557031	0.0557031	3.81049	0.675412	0.675412	0.675412	5.68631	6.75412e-07	5.68631	0.688029	0.491435	1	1	6.75412e-07	5.68631	0.688029	0.491435	1	1	UniProtKB	J3QS93, P43146	DCC		0021965 // spinal cord ventral commissure morphogenesis (GO_REF:0000019 [IEA] Ensembl:ENSMUSP00000110593) /// 0033563 // dorsal/ventral axon guidance (GO_REF:0000019 [IEA] Ensembl:ENSMUSP00000110593) /// 0001764 // neuron migration (GO_REF:0000019 [IEA] Ensembl:ENSMUSP00000110593) /// 0042981 // regulation of apoptosis (Reactome:REACT_13648 [TAS]) /// 0001975 // response to amphetamine (GO_REF:00…	0005886 // plasma membrane (Reactome:REACT_22142 [TAS]) /// 0005829 // cytosol (Reactome:REACT_22440 [TAS]) /// 0005886 // plasma membrane (Reactome:REACT_22199 [TAS]) /// 0005886 // plasma membrane (Reactome:REACT_22440 [TAS]) /// 0005886 // plasma membrane (Reactome:REACT_22137 [TAS]) /// 0032584 // growth cone membrane (GO_REF:0000019 [IEA] Ensembl:ENSRNOP00000041438) /// 0005886 // plasma mem…	0005515 // protein binding (PMID:20434207 [IPI] UniProtKB:P46777) /// 0005515 // protein binding (PMID:20434207 [IPI] UniProtKB:P46779) /// 0005515 // protein binding (PMID:18585357 [IPI] UniProtKB:Q9ERC8) /// 0005515 // protein binding (PMID:12011067 [IPI] UniProtKB:Q9UKG1) /// 0004888 // transmembrane receptor activity (PMID:8861902 [TAS]) /// 0005515 // protein binding (PMID:20434207 [IPI] Uni…	Netrin receptor DCC	J3QS93_HUMAN|DCC	protein	taxon:9606	20130119	InterPro			0.0198197	0.144124	1	1	10210	852	967	2	2	1	0	0	0	0
HFM1	0.115337	0.115337	0.115337	3.81049	1.39849	1.39849	1.39849	5.68631	1.39849e-06	5.68631	0.990039	0.322155	1	1	1.39849e-06	5.68631	0.990039	0.322155	1	1	UniProtKB	A6NGI5, A2PYH4	HFM1				0005524 // ATP binding (GO_REF:0000037 [IEA] UniProtKB-KW:KW-0067) /// 0008026 // ATP-dependent helicase activity (GO_REF:0000002 [IEA] InterPro:IPR011545) /// 0005524 // ATP binding (GO_REF:0000002 [IEA] InterPro:IPR001650|InterPro:IPR011545) /// 0003676 // nucleic acid binding (GO_REF:0000002 [IEA] InterPro:IPR001650|InterPro:IPR011545)	Probable ATP-dependent DNA helicase HFM1	HFM1_HUMAN|HFM1|SEC3D1	protein	taxon:9606	20130119	InterPro			0.0410381	0.29842	1	0	4931	565	87352	2	2	1	0	0	2	2
NRK	0.0705443	0.0705443	0.0705443	3.81049	0.855365	0.855365	0.855365	5.68631	8.55365e-07	5.68631	0.77428	0.438765	1	1	8.55365e-07	5.68631	0.77428	0.438765	1	1	UniProtKB	F5H049, B7Z1I7, Q7Z2Y5	NRK		0007256 // activation of JNKK activity (GO_REF:0000019 [IEA] Ensembl:ENSMUSP00000063397) /// 0060721 // regulation of spongiotrophoblast cell proliferation (GO_REF:0000019 [IEA] Ensembl:ENSMUSP00000063397) /// 0007567 // parturition (GO_REF:0000019 [IEA] Ensembl:ENSMUSP00000063397) /// 0008285 // negative regulation of cell proliferation (GO_REF:0000019 [IEA] Ensembl:ENSMUSP00000063397)		0005524 // ATP binding (GO_REF:0000037 [IEA] UniProtKB-KW:KW-0067) /// 0005524 // ATP binding (GO_REF:0000038 [IEA] UniProtKB-KW:KW-0067) /// 0016301 // kinase activity (GO_REF:0000038 [IEA] UniProtKB-KW:KW-0418) /// 0004674 // protein serine/threonine kinase activity (GO_REF:0000037 [IEA] UniProtKB-KW:KW-0723) /// 0005083 // small GTPase regulator activity (GO_REF:0000002 [IEA] InterPro:IPR00118…	cDNA FLJ50079, highly similar to Homo sapiens Nik related kinase (NRK), mRNA	B7Z1I7_HUMAN|NRK	protein	taxon:9606	20130119	InterPro			0.0251003	0.182524	1	1	8062	80	82	2	2	1	0	0	0	0
NRXN2	0.0768552	0.0768552	0.0768552	3.81049	0.931886	0.931886	0.931886	5.68631	9.31886e-07	5.68631	0.808172	0.418992	1	1	9.31886e-07	5.68631	0.808172	0.418992	1	1	UniProtKB	P58401, Q9P2S2, G5E9G7	NRXN2		0097104 /// 0007269 // neurotransmitter secretion (GO_REF:0000019 [IEA] Ensembl:ENSMUSP00000109089) /// 0007155 // cell adhesion (GO_REF:0000037 [IEA] UniProtKB-KW:KW-0130) /// 0097119 /// 0097118 /// 0097116	0016021 // integral to membrane (GO_REF:0000037 [IEA] UniProtKB-KW:KW-0812) /// 0016021 // integral to membrane (GO_REF:0000038 [IEA] UniProtKB-KW:KW-0812)	0046872 // metal ion binding (GO_REF:0000037 [IEA] UniProtKB-KW:KW-0479) /// 0005246 // calcium channel regulator activity (GO_REF:0000019 [IEA] Ensembl:ENSMUSP00000109089) /// 0050839 // cell adhesion molecule binding (GO_REF:0000024 [ISS] UniProtKB:Q3UGZ9)	Neurexin-2-alpha	G5E9G7_HUMAN|NRXN2|hCG_1810991	protein	taxon:9606	20130119	UniProtKB			0.0273458	0.198853	3	0	7400	81	86	2	2	1	0	0	0	0
LRP2	0.0361442	0.0361442	0.0361442	3.81049	0.438256	0.438256	0.438256	5.68631	4.38256e-07	5.68631	0.554225	0.579425	1	1	4.38256e-07	5.68631	0.554225	0.579425	1	1	UniProtKB	P98164, E9PC35	LRP2		0020028 // hemoglobin import (GO_REF:0000019 [IEA] Ensembl:ENSRNOP00000043580) /// 0006898 // receptor-mediated endocytosis (GO_REF:0000019 [IEA] Ensembl:ENSRNOP00000043580) /// 0042493 // response to drug (GO_REF:0000019 [IEA] Ensembl:ENSRNOP00000043580) /// 0046879 // hormone secretion (GO_REF:0000019 [IEA] Ensembl:ENSRNOP00000043580) /// 0006486 // protein amino acid glycosylation (PMID:278625…	0031526 // brush border membrane (GO_REF:0000019 [IEA] Ensembl:ENSRNOP00000043580) /// 0005794 // Golgi apparatus (GO_REF:0000019 [IEA] Ensembl:ENSMUSP00000079752) /// 0005886 // plasma membrane (Reactome:REACT_13608 [TAS]) /// 0005615 // extracellular space (GO_REF:0000019 [IEA] Ensembl:ENSRNOP00000043580) /// 0016021 // integral to membrane (GO_REF:0000038 [IEA] UniProtKB-KW:KW-0812) /// 000590…	0017124 // SH3 domain binding (GO_REF:0000037 [IEA] UniProtKB-KW:KW-0729) /// 0005515 // protein binding (PMID:14528014 [IPI] UniProtKB:Q5SW96) /// 0042954 // lipoprotein transporter activity (GO_REF:0000019 [IEA] Ensembl:ENSRNOP00000043580) /// 0030492 // hemoglobin binding (GO_REF:0000019 [IEA] Ensembl:ENSRNOP00000043580) /// 0005515 // protein binding (PMID:9773776 [IPI] UniProtKB:P01308) /// …	Low-density lipoprotein receptor-related protein 2	E9PC35_HUMAN|LRP2	protein	taxon:9606	20130119	UniProtKB			0.0128604	0.0935183	1	1	15735	179	185	2	2	1	0	0	1	1
PTGES3L	0.403915	0.403915	0.403915	3.66937	4.92476	4.92476	4.92476	5.47571	4.92476e-06	5.47571	1.84493	0.0650473	1	1	4.92476e-06	5.47571	1.84493	0.0650473	1	1																0.151315	1.10033	3	0	2006	2	17	2	3	0.666667	2	2	0	0
MICB (NT_167248 2759573..2772598)	0.654751	0.654751	0.654751	3.66937	7.98309	7.98309	7.98309	5.47571	7.98309e-06	5.47571	2.34895	0.0188264	0.490713	1	7.98309e-06	5.47571	2.34895	0.0188264	0.490711	1																0.245283	1.78365	1	1	2475	0	7	0	6	0	0	1	0	0
RASGEF1A	0.250465	0.250465	0.250465	3.66937	3.05381	3.05381	3.05381	5.47571	3.05381e-06	5.47571	1.45281	0.146277	1	1	3.05381e-06	5.47571	1.45281	0.146277	1	1	UniProtKB	Q8N9B8, H7BYA3	RASGEF1A		0007264 // small GTPase mediated signal transduction (GO_REF:0000002 [IEA] InterPro:IPR001895|InterPro:IPR008937) /// 0051056 // regulation of small GTPase mediated signal transduction (GO_REF:0000002 [IEA] InterPro:IPR000651) /// 0016477 // cell migration (PMID:17121879 [IDA])	0005622 // intracellular (GO_REF:0000002 [IEA] InterPro:IPR000651|InterPro:IPR001895|InterPro:IPR008937)	0005088 // Ras guanyl-nucleotide exchange factor activity (PMID:19645719 [IDA]) /// 0005088 // Ras guanyl-nucleotide exchange factor activity (PMID:17121879 [IDA]) /// 0005085 // guanyl-nucleotide exchange factor activity (GO_REF:0000002 [IEA] InterPro:IPR000651|InterPro:IPR001895|InterPro:IPR008937)	Ras-GEF domain-containing family member 1A	H7BYA3_HUMAN|RASGEF1A	protein	taxon:9606	20130119	InterPro			0.0938294	0.682308	1	1	3235	29	31	3	3	1	0	0	1	1
SPDYE5 (NT_007933 13157141..13166471)	0.394368	0.394368	0.394368	3.5988	4.82272	4.82272	4.82272	5.37041	4.82272e-06	5.37041	1.81896	0.068917	1	1	4.82272e-06	5.37041	1.81897	0.068917	1	1																0.15175	1.10349	1	1	2667	2	14	0	4	0	0	0	0	1
MICB (NT_007592 31405854..31418901)	0.618136	0.618136	0.618136	3.52824	7.58293	7.58293	7.58293	5.2651	7.58293e-06	5.2651	2.27206	0.0230827	0.556367	1	7.58293e-06	5.2651	2.27207	0.0230826	0.556366	1																0.244493	1.7779	1	1	2483	0	8	0	6	0	0	1	0	1
MYO3A	0.0417576	0.0417576	0.0417576	3.38711	0.515753	0.515753	0.515753	5.0545	5.15753e-07	5.0545	0.587693	0.556738	1	1	5.15753e-07	5.0545	0.587693	0.556738	1	1	UniProtKB	B1ANA3, Q4G0X2, Q8NEV4, F5H0U9	MYO3A		0007605 // sensory perception of sound (PMID:12032315 [IMP]) /// 0046777 // protein amino acid autophosphorylation (PMID:12672820 [IDA]) /// 0050896 // response to stimulus (GO_REF:0000037 [IEA] UniProtKB-KW:KW-0716) /// 0007601 // visual perception (GO_REF:0000037 [IEA] UniProtKB-KW:KW-0844)	0030175 // filopodium (PMID:17021180 [IDA]) /// 0031941 // filamentous actin (PMID:12672820 [IDA]) /// 0016459 // myosin complex (GO_REF:0000037 [IEA] UniProtKB-KW:KW-0518) /// 0005737 // cytoplasm (GO_REF:0000037 [IEA] UniProtKB-KW:KW-0963) /// 0016459 // myosin complex (GO_REF:0000002 [IEA] InterPro:IPR001609)	0043531 // ADP binding (PMID:12672820 [IDA]) /// 0004672 // protein kinase activity (GO_REF:0000002 [IEA] InterPro:IPR000719) /// 0000146 // microfilament motor activity (PMID:17021180 [IMP]) /// 0004672 // protein kinase activity (PMID:12672820 [IDA]) /// 0003779 // actin binding (GO_REF:0000037 [IEA] UniProtKB-KW:KW-0009) /// 0060002 // plus-end directed microfilament motor activity (PMID:12672…	Myosin IIIA	B1ANA3_HUMAN|MYO3A|RP11-420F12.1-004	protein	taxon:9606	20130119	InterPro			0.017493	0.127205	1	1	5784	179	200	1	1	1	0	0	0	0
ADPRH	0.0702315	0.0702315	0.0702315	3.38711	0.867438	0.867438	0.867438	5.0545	8.67438e-07	5.0545	0.762165	0.445962	1	1	8.67438e-07	5.0545	0.762165	0.445962	1	1	UniProtKB	P54922, C9JZW7	ADPRH		0006464 // protein modification process (PMID:8349667 [IMP]) /// 0006464 // protein modification process (GO_REF:0000019 [IEA] Ensembl:ENSMUSP00000002923) /// 0051725 // protein amino acid de-ADP-ribosylation (GO_REF:0000002 [IEA] InterPro:IPR012108) /// 0006464 // protein modification process (GO_REF:0000019 [IEA] Ensembl:ENSRNOP00000034815)		0003875 // ADP-ribosylarginine hydrolase activity (PMID:8349667 [IMP]) /// 0000287 // magnesium ion binding (GO_REF:0000002 [IEA] InterPro:IPR012108) /// 0003875 // ADP-ribosylarginine hydrolase activity (GO_REF:0000019 [IEA] Ensembl:ENSRNOP00000034815)	[Protein ADP-ribosylarginine] hydrolase	C9JZW7_HUMAN|ADPRH	protein	taxon:9606	20130119	ENSEMBL			0.0294212	0.213944	1	1	3439	19	20	0	1	0	0	0	0	0
ASAH2	0.199773	0.199773	0.199773	3.38711	2.46743	2.46743	2.46743	5.0545	2.46743e-06	5.0545	1.28544	0.198638	1	1	2.46743e-06	5.0545	1.28544	0.198638	1	1	UniProtKB	Q9NR71	ASAH2		0007165 // signal transduction (PMID:10781606 [TAS]) /// 0006687 // glycosphingolipid metabolic process (Reactome:REACT_116105 [TAS]) /// 0006672 // ceramide metabolic process (PMID:10781606 [TAS]) /// 0006915 // apoptosis (GO_REF:0000037 [IEA] UniProtKB-KW:KW-0053) /// 0044281 /// 0006644 // phospholipid metabolic process (Reactome:REACT_120870 [TAS]) /// 0006665 // sphingolipid metabolic proces…	0005886 // plasma membrane (Reactome:REACT_115894 [TAS]) /// 0005739 // mitochondrion (PMID:10781606 [TAS]) /// 0016021 // integral to membrane (GO_REF:0000037 [IEA] UniProtKB-KW:KW-0812)	0017040 // ceramidase activity (GO_REF:0000003 [IEA] EC:3.5.1.23)	Neutral ceramidase	ASAH2_HUMAN|HNAC1|ASAH2	protein	taxon:9606	20030904	PINC			0.0836885	0.608565	2	0	2418	10	36	2	2	1	2	2	0	0
ATP13A4	0.0565105	0.0565105	0.0565105	3.38711	0.697969	0.697969	0.697969	5.0545	6.97969e-07	5.0545	0.683672	0.494183	1	1	6.97969e-07	5.0545	0.683672	0.494183	1	1	UniProtKB	B7WPN9, Q4VNC1, H0Y4Z2	ATP13A4		0006812 // cation transport (GO_REF:0000002 [IEA] InterPro:IPR001757|InterPro:IPR006544) /// 0006754 // ATP biosynthetic process (GO_REF:0000002 [IEA] InterPro:IPR006069)	0016021 // integral to membrane (GO_REF:0000037 [IEA] UniProtKB-KW:KW-0812) /// 0016021 // integral to membrane (GO_REF:0000038 [IEA] UniProtKB-KW:KW-0812)	0005524 // ATP binding (GO_REF:0000037 [IEA] UniProtKB-KW:KW-0067) /// 0046872 // metal ion binding (GO_REF:0000037 [IEA] UniProtKB-KW:KW-0479) /// 0005524 // ATP binding (GO_REF:0000038 [IEA] UniProtKB-KW:KW-0067) /// 0015662 // ATPase activity, coupled to transmembrane movement of ions, phosphorylative mechanism (GO_REF:0000002 [IEA] InterPro:IPR001757|InterPro:IPR006069) /// 0046872 // metal i…	Probable cation-transporting ATPase 13A4	B7WPN9_HUMAN|ATP13A4	protein	taxon:9606	20130119	UniProtKB			0.0236732	0.172147	1	1	4274	87	92	1	1	1	0	0	0	0
C19orf26	0.282597	0.282597	0.282597	3.38711	3.49039	3.49039	3.49039	5.0545	3.49039e-06	5.0545	1.52886	0.1263	1	1	3.49039e-06	5.0545	1.52886	0.1263	1	1																0.118385	0.860868	1	1	2564	8	8	3	3	1	0	0	0	0
C3orf70	0.0818593	0.0818593	0.0818593	3.38711	1.01106	1.01106	1.01106	5.0545	1.01106e-06	5.0545	0.822843	0.410597	1	1	1.01106e-06	5.0545	0.822843	0.410597	1	1																0.0342923	0.249366	1	1	5901	68	73	2	2	1	0	0	0	0
C6orf99	0.378567	0.378567	0.378567	3.38711	4.67573	4.67573	4.67573	5.0545	4.67573e-06	5.0545	1.76952	0.0768074	1	1	4.67573e-06	5.0545	1.76952	0.0768074	1	1																0.158588	1.15322	1	1	638	23	26	1	1	1	0	0	0	0
CD40	0.298918	0.298918	0.298918	3.38711	3.69198	3.69198	3.69198	5.0545	3.69198e-06	5.0545	1.57239	0.115861	1	1	3.69198e-06	5.0545	1.57239	0.115861	1	1	UniProtKB	P25942	CD40		0050776 // regulation of immune response (Reactome:REACT_11152 [TAS]) /// 0043089 // positive regulation of Cdc42 GTPase activity (PMID:21410936 [IMP]) /// 0048304 // positive regulation of isotype switching to IgG isotypes (GO_REF:0000019 [IEA] Ensembl:ENSMUSP00000017799) /// 0006954 // inflammatory response (PMID:2475341 [TAS]) /// 0032855 // positive regulation of Rac GTPase activity (PMID:214…	0035631 /// 0005886 // plasma membrane (Reactome:REACT_11241 [TAS]) /// 0005886 // plasma membrane (GO_REF:0000024 [ISS] UniProtKB:P27512) /// 0009897 // external side of plasma membrane (GO_REF:0000019 [IEA] Ensembl:ENSMUSP00000017799) /// 0043231 // intracellular membrane-bounded organelle (GO_REF:0000019 [IEA] Ensembl:ENSMUSP00000017799) /// 0005576 // extracellular region (GO_REF:0000039 [IEA…	0031625 // ubiquitin protein ligase binding (PMID:11279055 [IPI] UniProtKB:Q12933) /// 0031625 // ubiquitin protein ligase binding (PMID:11279055 [IPI] UniProtKB:O94972) /// 0005515 // protein binding (PMID:20676093 [IPI] UniProtKB:Q9Y4K3) /// 0005515 // protein binding (PMID:9468137 [IPI] UniProtKB:P29965) /// 0005515 // protein binding (PMID:7527023 [IPI] UniProtKB:Q13114) /// 0005515 // protei…	Tumor necrosis factor receptor superfamily member 5	TNR5_HUMAN|TNFRSF5|CD40	protein	taxon:9606	20130119	ENSEMBL			0.125222	0.910588	2	0	1616	8	9	2	2	1	0	0	2	2
CD72	0.156025	0.156025	0.156025	3.38711	1.92708	1.92708	1.92708	5.0545	1.92708e-06	5.0545	1.136	0.255955	1	1	1.92708e-06	5.0545	1.136	0.255955	1	1	UniProtKB	P21854	CD72		0007411 // axon guidance (Reactome:REACT_18266 [TAS]) /// 0007155 // cell adhesion (PMID:1711157 [TAS])	0005886 // plasma membrane (Reactome:REACT_19336 [TAS]) /// 0005887 // integral to plasma membrane (PMID:1711157 [IDA])	0005102 // receptor binding (PMID:1711157 [TAS]) /// 0004888 // transmembrane receptor activity (PMID:1711157 [NAS]) /// 0005515 // protein binding (PMID:1711157 [IPI] UniProtKB:P06127) /// 0030246 // carbohydrate binding (GO_REF:0000002 [IEA] InterPro:IPR001304)	B-cell differentiation antigen CD72	CD72_HUMAN|CD72	protein	taxon:9606	20040421	UniProtKB			0.0653614	0.475294	1	1	1548	10	10	1	1	1	1	1	0	0
DLC1	0.0280942	0.0280942	0.0280942	3.38711	0.346995	0.346995	0.346995	5.0545	3.46995e-07	5.0545	0.482049	0.629771	1	1	3.46995e-07	5.0545	0.482049	0.629771	1	1	UniProtKB	E9PDZ8, Q96QB1, D6RGY9	DLC1		0007165 // signal transduction (GO_REF:0000002 [IEA] InterPro:IPR000198|InterPro:IPR008936) /// 0001843 // neural tube closure (GO_REF:0000019 [IEA] Ensembl:ENSMUSP00000033923) /// 0051497 // negative regulation of stress fiber formation (PMID:17932950 [IDA]) /// 0032869 // cellular response to insulin stimulus (GO_REF:0000019 [IEA] Ensembl:ENSRNOP00000014923) /// 0006917 // induction of apoptosi…	0005737 // cytoplasm (PMID:16951145 [IDA]) /// 0045121 // membrane raft (GO_REF:0000019 [IEA] Ensembl:ENSRNOP00000014923) /// 0005901 // caveola (PMID:16951145 [IDA]) /// 0005884 // actin filament (GO_REF:0000019 [IEA] Ensembl:ENSRNOP00000014923) /// 0005829 // cytosol (Reactome:REACT_9982 [TAS]) /// 0001725 // stress fiber (GO_REF:0000019 [IEA] Ensembl:ENSRNOP00000014923) /// 0005634 // nucleus …	0042169 // SH2 domain binding (PMID:17190795 [IPI] UniProtKB:Q9HBL0) /// 0005100 // Rho GTPase activator activity (PMID:17888903 [IMP]) /// 0030675 // Rac GTPase activator activity (PMID:17932950 [IDA]) /// 0005100 // Rho GTPase activator activity (GO_REF:0000019 [IEA] Ensembl:ENSRNOP00000014923) /// 0042169 // SH2 domain binding (PMID:17190795 [IPI] UniProtKB:Q8IZW8) /// 0042169 // SH2 domain bi…	Rho GTPase-activating protein 7	D6RGY9_HUMAN|hCG_28295|DLC1	protein	taxon:9606	20130119	ENSEMBL			0.0117692	0.0855828	4	0	8597	319	361	1	1	1	0	0	0	0
FAM228B	0.177985	0.177985	0.177985	3.38711	2.19832	2.19832	2.19832	5.0545	2.19832e-06	5.0545	1.21332	0.225008	1	1	2.19832e-06	5.0545	1.21332	0.225008	1	1																0.0745611	0.542192	1	0	1357	67	74	1	1	1	0	0	1	1
FBXL13	0.222127	0.222127	0.222127	3.38711	2.74352	2.74352	2.74352	5.0545	2.74352e-06	5.0545	1.35545	0.175274	1	1	2.74352e-06	5.0545	1.35545	0.175274	1	1																0.0930528	0.67666	2	0	3262	525	671	3	3	1	2	2	0	0
LOC100652943	0.197325	0.197325	0.197325	3.38711	2.43719	2.43719	2.43719	5.0545	2.43719e-06	5.0545	1.27754	0.201412	1	1	2.43719e-06	5.0545	1.27754	0.201412	1	1																0.0826629	0.601107	1	1	2448	2	2	2	2	1	0	0	0	0
LRRC37A2 (NW_003871086 414929..452759)	0.0501612	0.0501612	0.0501612	3.38711	0.619547	0.619547	0.619547	5.0545	6.19547e-07	5.0545	0.64412	0.519498	1	1	6.19547e-07	5.0545	0.64412	0.519498	1	1																0.0210134	0.152805	1	1	4815	0	6	0	1	0	0	0	0	0
NBL1	0.168722	0.168722	0.168722	3.38711	2.08391	2.08391	2.08391	5.0545	2.08391e-06	5.0545	1.18132	0.237474	1	1	2.08391e-06	5.0545	1.18133	0.237474	1	1	UniProtKB	E5RFZ1, A3KFI4, A3KFI5, A3KFI2, A3KFI3, P41271	NBL1		0045666 // positive regulation of neuron differentiation (GO_REF:0000019 [IEA] Ensembl:ENSMUSP00000045608) /// 0090027 // negative regulation of monocyte chemotaxis (GO_REF:0000024 [ISS] UniProtKB:Q61477) /// 0048812 // neuron projection morphogenesis (GO_REF:0000019 [IEA] Ensembl:ENSMUSP00000045608) /// 0035582 /// 0045666 // positive regulation of neuron differentiation (GO_REF:0000024 [ISS] Un…	0005576 // extracellular region (GO_REF:0000039 [IEA] UniProtKB-SubCell:SL-0243)	0016015 /// 0036122	Neuroblastoma, suppression of tumorigenicity 1	A3KFI2_HUMAN|RP5-1056L3.4-005|NBL1	protein	taxon:9606	20130119	ENSEMBL			0.0706807	0.513975	5	0	2863	0	4	0	2	0	0	0	0	0
RAB19	0.253704	0.253704	0.253704	3.38711	3.13353	3.13353	3.13353	5.0545	3.13353e-06	5.0545	1.44859	0.147451	1	1	3.13353e-06	5.0545	1.44859	0.147451	1	1	UniProtKB	C9JJQ5, A4D1S5	RAB19		0015031 // protein transport (GO_REF:0000002 [IEA] InterPro:IPR003579) /// 0007264 // small GTPase mediated signal transduction (GO_REF:0000002 [IEA] InterPro:IPR001806|InterPro:IPR003579)	0005886 // plasma membrane (GO_REF:0000039 [IEA] UniProtKB-SubCell:SL-0039)	0005525 // GTP binding (GO_REF:0000037 [IEA] UniProtKB-KW:KW-0342) /// 0005525 // GTP binding (GO_REF:0000038 [IEA] UniProtKB-KW:KW-0342)	Ras-related protein Rab-19	RAB19_HUMAN|RAB19|RAB19B	protein	taxon:9606	20130119	UniProtKB			0.106281	0.772852	1	0	952	22	25	1	1	1	0	0	1	1
RD3	0.0566165	0.0566165	0.0566165	3.38711	0.699278	0.699278	0.699278	5.0545	6.99278e-07	5.0545	0.684312	0.493778	1	1	6.99278e-07	5.0545	0.684312	0.493778	1	1	UniProtKB	Q7Z3Z2	RD3		0060041 // retina development in camera-type eye (GO_REF:0000019 [IEA] Ensembl:ENSMUSP00000050188) /// 0050896 // response to stimulus (GO_REF:0000037 [IEA] UniProtKB-KW:KW-0716) /// 0007601 // visual perception (GO_REF:0000037 [IEA] UniProtKB-KW:KW-0844)			Protein RD3	RD3_HUMAN|RD3|C1orf36	protein	taxon:9606	20130119	UniProtKB			0.0237176	0.17247	2	0	4266	9	9	1	1	1	0	0	0	0
RPRML	0.220975	0.220975	0.220975	3.38711	2.72929	2.72929	2.72929	5.0545	2.72929e-06	5.0545	1.35193	0.176397	1	1	2.72929e-06	5.0545	1.35193	0.176397	1	1	UniProtKB	Q8N4K4	RPRML			0016021 // integral to membrane (GO_REF:0000037 [IEA] UniProtKB-KW:KW-0812)		Reprimo-like protein	RPRML_HUMAN|RPRML	protein	taxon:9606	20130119	UniProtKB			0.0925704	0.673152	1	1	1093	1	1	1	1	1	0	0	0	0
SCN3B	0.0398164	0.0398164	0.0398164	3.38711	0.491777	0.491777	0.491777	5.0545	4.91777e-07	5.0545	0.57387	0.566056	1	1	4.91777e-07	5.0545	0.57387	0.566056	1	1	UniProtKB	Q9NY72, E9PQS8, E9PJP6	SCN3B		0010765 // positive regulation of sodium ion transport (PMID:20042427 [IDA]) /// 0010460 // positive regulation of heart rate (GO_REF:0000019 [IEA] Ensembl:ENSMUSP00000051627) /// 0072659 /// 2000649 /// 0060371 // regulation of atrial cardiomyocyte membrane depolarization (PMID:21051419 [IMP]) /// 0035725 /// 0019233 // sensory perception of pain (GO_REF:0000019 [IEA] Ensembl:ENSRNOP00000062210)…	0005886 // plasma membrane (PMID:11256614 [IDA]) /// 0016021 // integral to membrane (PMID:10688874 [NAS]) /// 0001518 // voltage-gated sodium channel complex (PMID:21895525 [TAS]) /// 0030018 // Z disc (GO_REF:0000024 [ISS] UniProtKB:Q8BHK2) /// 0016021 // integral to membrane (GO_REF:0000019 [IEA] Ensembl:ENSRNOP00000062210) /// 0001518 // voltage-gated sodium channel complex (PMID:21051419 [ID…	0086006 /// 0017080 // sodium channel regulator activity (PMID:20042427 [IMP]) /// 0044325 /// 0017080 // sodium channel regulator activity (PMID:20226894 [IDA]) /// 0005248 // voltage-gated sodium channel activity (PMID:10688874 [NAS])	Sodium channel subunit beta-3	E9PJP6_HUMAN|SCN3B	protein	taxon:9606	20130119	ENSEMBL			0.0166798	0.121292	2	0	6066	24	24	1	1	1	0	0	0	0
SRSF12	0.201328	0.201328	0.201328	3.38711	2.48662	2.48662	2.48662	5.0545	2.48662e-06	5.0545	1.29043	0.196901	1	1	2.48662e-06	5.0545	1.29043	0.196901	1	1	UniProtKB	Q8WXF0	SRSF12		0000395 // nuclear mRNA 5'-splice site recognition (PMID:11684676 [IDA]) /// 0000381 // regulation of alternative nuclear mRNA splicing, via spliceosome (PMID:11684676 [IDA]) /// 0048025 // negative regulation of nuclear mRNA splicing, via spliceosome (PMID:11684676 [ISS] UniProtKB:O75494) /// 0000244 // assembly of spliceosomal tri-snRNP (PMID:11684676 [NAS]) /// 0016482 // cytoplasmic transport…	0005654 // nucleoplasm (PMID:11684676 [ISS] UniProtKB:O75494)	0003723 // RNA binding (PMID:11684676 [NAS]) /// 0051082 // unfolded protein binding (PMID:11684676 [NAS]) /// 0050733 // RS domain binding (PMID:11684676 [NAS]) /// 0000166 // nucleotide binding (GO_REF:0000002 [IEA] InterPro:IPR012677)	Serine/arginine-rich splicing factor 12	SRS12_HUMAN|SFRS13B|SRSF12|SFRS19|SRRP35	protein	taxon:9606	20130119	InterPro			0.0843396	0.6133	1	1	3599	19	21	3	3	1	0	0	0	0
TNIP3	0.0879236	0.0879236	0.0879236	3.38711	1.08595	1.08595	1.08595	5.0545	1.08595e-06	5.0545	0.852777	0.393783	1	1	1.08595e-06	5.0545	0.852777	0.393783	1	1	UniProtKB	Q96KP6	TNIP3		0043124 // negative regulation of I-kappaB kinase/NF-kappaB cascade (PMID:17088249 [IDA]) /// 0006954 // inflammatory response (GO_REF:0000037 [IEA] UniProtKB-KW:KW-0395) /// 0071222 /// 0002756 // MyD88-independent toll-like receptor signaling pathway (PMID:17088249 [IDA]) /// 0034142 // toll-like receptor 4 signaling pathway (PMID:17088249 [IDA])		0031593 // polyubiquitin binding (PMID:18212736 [IDA])	TNFAIP3-interacting protein 3	TNIP3_HUMAN|ABIN3|TNIP3|LIND	protein	taxon:9606	20120521	UniProtKB			0.0368327	0.267839	3	0	2747	49	52	1	1	1	1	1	0	0
TRIM72	0.112233	0.112233	0.112233	3.38711	1.38621	1.38621	1.38621	5.0545	1.38621e-06	5.0545	0.963482	0.335305	1	1	1.38621e-06	5.0545	0.963483	0.335306	1	1	UniProtKB	Q6ZMU5	TRIM72		0006887 // exocytosis (GO_REF:0000037 [IEA] UniProtKB-KW:KW-0268) /// 0003012 // muscle system process (GO_REF:0000024 [ISS] UniProtKB:Q1XH17) /// 0051260 // protein homooligomerization (GO_REF:0000024 [ISS] UniProtKB:Q1XH17) /// 0001778 // plasma membrane repair (GO_REF:0000024 [ISS] UniProtKB:Q1XH17) /// 0007517 // muscle organ development (GO_REF:0000024 [ISS] UniProtKB:Q1XH17)	0042383 // sarcolemma (GO_REF:0000024 [ISS] UniProtKB:Q1XH17) /// 0030659 // cytoplasmic vesicle membrane (GO_REF:0000024 [ISS] UniProtKB:Q1XH17)	0046872 // metal ion binding (GO_REF:0000037 [IEA] UniProtKB-KW:KW-0479) /// 0001786 // phosphatidylserine binding (GO_REF:0000024 [ISS] UniProtKB:Q1XH17) /// 0008270 // zinc ion binding (GO_REF:0000002 [IEA] InterPro:IPR000315|InterPro:IPR001841)	Tripartite motif-containing protein 72	TRI72_HUMAN|TRIM72|MG53	protein	taxon:9606	20090723	UniProtKB			0.0470165	0.341894	1	1	2152	14	15	1	1	1	0	0	0	0
ZNF524	0.217787	0.217787	0.217787	3.38711	2.68992	2.68992	2.68992	5.0545	2.68992e-06	5.0545	1.34214	0.179549	1	1	2.68992e-06	5.0545	1.34215	0.179549	1	1	UniProtKB	K7EP10, Q96C55	ZNF524		0006355 // regulation of transcription, DNA-dependent (GO_REF:0000037 [IEA] UniProtKB-KW:KW-0805) /// 0006351 // transcription, DNA-dependent (GO_REF:0000037 [IEA] UniProtKB-KW:KW-0804)	0005634 // nucleus (GO_REF:0000039 [IEA] UniProtKB-SubCell:SL-0191)	0046872 // metal ion binding (GO_REF:0000037 [IEA] UniProtKB-KW:KW-0479) /// 0003677 // DNA binding (GO_REF:0000037 [IEA] UniProtKB-KW:KW-0238) /// 0008270 // zinc ion binding (GO_REF:0000002 [IEA] InterPro:IPR007087|InterPro:IPR015880) /// 0003677 // DNA binding (GO_REF:0000002 [IEA] InterPro:IPR017956)	Zinc finger protein 524	K7EP10_HUMAN|ZNF524	protein	taxon:9606	20130119	InterPro			0.0912348	0.66344	1	1	1109	9	9	1	1	1	0	0	0	0
ZNF570	0.107488	0.107488	0.107488	3.38711	1.3276	1.3276	1.3276	5.0545	1.3276e-06	5.0545	0.942895	0.345735	1	1	1.3276e-06	5.0545	0.942895	0.345735	1	1	UniProtKB	K7EP39, Q96NI8, K7ENX9, K7EP64, K7EMF5, B4DMP1	ZNF570		0006355 // regulation of transcription, DNA-dependent (GO_REF:0000037 [IEA] UniProtKB-KW:KW-0805) /// 0006355 // regulation of transcription, DNA-dependent (GO_REF:0000002 [IEA] InterPro:IPR001909) /// 0006351 // transcription, DNA-dependent (GO_REF:0000037 [IEA] UniProtKB-KW:KW-0804)	0005634 // nucleus (GO_REF:0000039 [IEA] UniProtKB-SubCell:SL-0191) /// 0005622 // intracellular (GO_REF:0000002 [IEA] InterPro:IPR001909|InterPro:IPR015880) /// 0005622 // intracellular (GO_REF:0000002 [IEA] InterPro:IPR015880) /// 0005622 // intracellular (GO_REF:0000002 [IEA] InterPro:IPR001909)	0003676 // nucleic acid binding (GO_REF:0000002 [IEA] InterPro:IPR001909) /// 0003676 // nucleic acid binding (GO_REF:0000002 [IEA] InterPro:IPR001909|InterPro:IPR013087) /// 0046872 // metal ion binding (GO_REF:0000037 [IEA] UniProtKB-KW:KW-0479) /// 0003677 // DNA binding (GO_REF:0000037 [IEA] UniProtKB-KW:KW-0238) /// 0003676 // nucleic acid binding (GO_REF:0000002 [IEA] InterPro:IPR013087) //…	Zinc finger protein 570	B4DMP1_HUMAN|ZNF570	protein	taxon:9606	20130119	InterPro			0.0450287	0.327439	1	1	2247	3	3	1	1	1	0	0	0	0
ACOXL	0.101781	0.101781	0.101781	3.38711	1.25711	1.25711	1.25711	5.0545	1.25711e-06	5.0545	0.917521	0.35887	1	1	1.25711e-06	5.0545	0.917521	0.35887	1	1	UniProtKB	Q9NUZ1, H7C2M3, E9PB20, H7C345, H7C0A6	ACOXL		0006635 // fatty acid beta-oxidation (GO_REF:0000002 [IEA] InterPro:IPR002655) /// 0008150 // biological_process (GO_REF:0000015 [ND]) /// 0006631 // fatty acid metabolic process (GO_REF:0000002 [IEA] InterPro:IPR012258)	0005777 // peroxisome (GO_REF:0000002 [IEA] InterPro:IPR012258) /// 0005777 // peroxisome (GO_REF:0000002 [IEA] InterPro:IPR002655|InterPro:IPR012258) /// 0005575 // cellular_component (GO_REF:0000015 [ND])	0003674 // molecular_function (GO_REF:0000015 [ND]) /// 0003997 // acyl-CoA oxidase activity (GO_REF:0000002 [IEA] InterPro:IPR002655|InterPro:IPR012258) /// 0050660 // FAD binding (GO_REF:0000002 [IEA] InterPro:IPR012258) /// 0003997 // acyl-CoA oxidase activity (GO_REF:0000002 [IEA] InterPro:IPR012258) /// 0016627 // oxidoreductase activity, acting on the CH-CH group of donors (GO_REF:0000002 […	Acyl-coenzyme A oxidase	E9PB20_HUMAN|ACOXL	protein	taxon:9606	20130119	InterPro			0.0426378	0.310053	1	1	2373	252	335	1	1	1	0	0	0	0
ALOX5 (NW_003315935 215006..286950)	0.0943093	0.0943093	0.0943093	3.38711	1.16483	1.16483	1.16483	5.0545	1.16483e-06	5.0545	0.883202	0.377127	1	1	1.16483e-06	5.0545	0.883202	0.377127	1	1																0.0395078	0.287292	3	0	2561	0	28	0	1	0	0	0	0	0
BARHL1	0.126652	0.126652	0.126652	3.38711	1.5643	1.5643	1.5643	5.0545	1.5643e-06	5.0545	1.0235	0.30607	1	1	1.5643e-06	5.0545	1.0235	0.30607	1	1	UniProtKB	Q9BZE3	BARHL1		0030901 // midbrain development (GO_REF:0000019 [IEA] Ensembl:ENSMUSP00000053147) /// 0043524 // negative regulation of neuron apoptosis (GO_REF:0000019 [IEA] Ensembl:ENSMUSP00000053147) /// 0007605 // sensory perception of sound (GO_REF:0000019 [IEA] Ensembl:ENSMUSP00000053147) /// 0001764 // neuron migration (GO_REF:0000019 [IEA] Ensembl:ENSMUSP00000053147)	0005634 // nucleus (GO_REF:0000039 [IEA] UniProtKB-SubCell:SL-0191)	0043565 // sequence-specific DNA binding (GO_REF:0000002 [IEA] InterPro:IPR001356|InterPro:IPR017970) /// 0001077	BarH-like 1 homeobox protein	BARH1_HUMAN|FKSG31|BARHL1	protein	taxon:9606	20130119	ENSEMBL			0.0530568	0.385818	1	1	1907	3	3	1	1	1	0	0	0	0
C11orf93	0.13546	0.13546	0.13546	3.38711	1.67309	1.67309	1.67309	5.0545	1.67309e-06	5.0545	1.0585	0.289829	1	1	1.67309e-06	5.0545	1.0585	0.289829	1	1																0.0567467	0.41265	3	1	1783	6	7	0	1	0	0	0	0	0
C14orf132	0.031851	0.031851	0.031851	3.38711	0.393395	0.393395	0.393395	5.0545	3.93395e-07	5.0545	0.513268	0.607764	1	1	3.93395e-07	5.0545	0.513268	0.607764	1	1	UniProtKB	Q9NPU4	C14orf132			0016021 // integral to membrane (GO_REF:0000037 [IEA] UniProtKB-KW:KW-0812)		Putative uncharacterized protein C14orf132	CN132_HUMAN|C14orf132	protein	taxon:9606	20130119	UniProtKB			0.0133429	0.0970269	1	1	7583	26	26	1	1	1	0	0	0	0
C20orf196	0.209295	0.209295	0.209295	3.38711	2.58502	2.58502	2.58502	5.0545	2.58502e-06	5.0545	1.31572	0.188269	1	1	2.58502e-06	5.0545	1.31572	0.188269	1	1																0.0876771	0.637569	1	1	1154	154	183	1	1	1	0	0	0	0
C4orf40	0.0503494	0.0503494	0.0503494	3.38711	0.621872	0.621872	0.621872	5.0545	6.21872e-07	5.0545	0.645327	0.518715	1	1	6.21872e-07	5.0545	0.645327	0.518715	1	1	UniProtKB	Q6MZM9	C4orf40			0005576 // extracellular region (GO_REF:0000039 [IEA] UniProtKB-SubCell:SL-0243)		Uncharacterized protein C4orf40	CD040_HUMAN|C4orf40	protein	taxon:9606	20130119	UniProtKB			0.0210922	0.153378	1	1	4797	9	9	1	1	1	0	0	0	0
CCL20	0.286848	0.286848	0.286848	3.38711	3.5429	3.5429	3.5429	5.0545	3.5429e-06	5.0545	1.54031	0.123484	1	1	3.5429e-06	5.0545	1.54031	0.123484	1	1	UniProtKB	P78556	CCL20		0006954 // inflammatory response (GO_REF:0000037 [IEA] UniProtKB-KW:KW-0395) /// 0007267 // cell-cell signaling (PMID:9038201 [TAS]) /// 0006955 // immune response (GO_REF:0000002 [IEA] InterPro:IPR000827|InterPro:IPR001811|InterPro:IPR002473) /// 0006935 // chemotaxis (GO_REF:0000037 [IEA] UniProtKB-KW:KW-0145) /// 0042466 // chemokinesis (GO_REF:0000019 [IEA] Ensembl:ENSRNOP00000021730) /// 004…	0005576 // extracellular region (Reactome:REACT_14829 [TAS]) /// 0005615 // extracellular space (GO_REF:0000037 [IEA] UniProtKB-KW:KW-0202) /// 0005576 // extracellular region (Reactome:REACT_15538 [TAS]) /// 0005576 // extracellular region (Reactome:REACT_22289 [TAS]) /// 0005576 // extracellular region (Reactome:REACT_22239 [TAS])	0008009 // chemokine activity (GO_REF:0000019 [IEA] Ensembl:ENSRNOP00000021730)	C-C motif chemokine 20	CCL20_HUMAN|LARC|CCL20|MIP3A|SCYA20	protein	taxon:9606	20130119	UniProtKB			0.120166	0.873818	2	0	842	11	11	1	1	1	0	0	0	0
CERS4	0.132926	0.132926	0.132926	3.38711	1.64178	1.64178	1.64178	5.0545	1.64178e-06	5.0545	1.04855	0.294387	1	1	1.64178e-06	5.0545	1.04855	0.294387	1	1	UniProtKB	H0YKS3, H0YKC9, H0YMY6, H0YNR6, H0YKR4, Q9HA82, H0YLY3, H0YN04	CERS4		0046513 // ceramide biosynthetic process (GO_REF:0000019 [IEA] Ensembl:ENSMUSP00000008350) /// 0030148 // sphingolipid biosynthetic process (Reactome:REACT_115810 [TAS]) /// 0044281 /// 0006644 // phospholipid metabolic process (Reactome:REACT_120870 [TAS]) /// 0006665 // sphingolipid metabolic process (Reactome:REACT_19323 [TAS])	0031965 // nuclear membrane (GO_REF:0000039 [IEA] UniProtKB-SubCell:SL-0182) /// 0005789 // endoplasmic reticulum membrane (Reactome:REACT_19234 [TAS]) /// 0016021 // integral to membrane (GO_REF:0000002 [IEA] InterPro:IPR006634) /// 0016021 // integral to membrane (GO_REF:0000037 [IEA] UniProtKB-KW:KW-0812) /// 0016021 // integral to membrane (GO_REF:0000038 [IEA] UniProtKB-KW:KW-0812) /// 00057…	0043565 // sequence-specific DNA binding (GO_REF:0000002 [IEA] InterPro:IPR001356) /// 0050291 // sphingosine N-acyltransferase activity (GO_REF:0000019 [IEA] Ensembl:ENSMUSP00000008350) /// 0003700 // transcription factor activity (GO_REF:0000002 [IEA] InterPro:IPR001356)	Ceramide synthase 4	H0YKC9_HUMAN|CERS4	protein	taxon:9606	20130119	InterPro			0.0556849	0.404928	1	1	1817	107	127	1	1	1	1	1	0	0
COL6A2	0.0556255	0.0556255	0.0556255	3.38711	0.687038	0.687038	0.687038	5.0545	6.87038e-07	5.0545	0.678297	0.497583	1	1	6.87038e-07	5.0545	0.678297	0.497583	1	1	UniProtKB	P12110, C9JH44	COL6A2		0016337 // cell-cell adhesion (GO_REF:0000029 [NAS]) /// 0030198 // extracellular matrix organization (GO_REF:0000029 [NAS]) /// 0030198 // extracellular matrix organization (Reactome:REACT_118779 [TAS]) /// 0007411 // axon guidance (Reactome:REACT_18266 [TAS]) /// 0070208 // protein heterotrimerization (PMID:18400749 [IPI] UniProtKB:P12109) /// 0009749 // response to glucose stimulus (GO_REF:000…	0005578 // proteinaceous extracellular matrix (GO_REF:0000029 [NAS]) /// 0005576 // extracellular region (Reactome:REACT_121366 [TAS]) /// 0005788 // endoplasmic reticulum lumen (Reactome:REACT_121366 [TAS]) /// 0005576 // extracellular region (Reactome:REACT_16880 [TAS]) /// 0031012 // extracellular matrix (PMID:22261194 [ISS] UniProtKB:Q1T7A6) /// 0005576 // extracellular region (Reactome:REACT…	0030674 // protein binding, bridging (GO_REF:0000029 [NAS]) /// 0005201 // extracellular matrix structural constituent (GO_REF:0000029 [NAS]) /// 0005515 // protein binding (PMID:12812986 [IPI] UniProtKB:Q9NRI5)	Collagen alpha-2(VI) chain	C9JH44_HUMAN|COL6A2	protein	taxon:9606	20130119	ENSEMBL			0.0233025	0.169451	3	0	4342	39	42	1	1	1	0	0	1	1
CPSF4L	0.373301	0.373301	0.373301	3.38711	4.61069	4.61069	4.61069	5.0545	4.61069e-06	5.0545	1.75717	0.0788892	1	1	4.61069e-06	5.0545	1.75717	0.0788891	1	1	UniProtKB	H9KVA5, A6NMK7	CPSF4L				0046872 // metal ion binding (GO_REF:0000037 [IEA] UniProtKB-KW:KW-0479) /// 0003676 // nucleic acid binding (GO_REF:0000002 [IEA] InterPro:IPR000571) /// 0008270 // zinc ion binding (GO_REF:0000002 [IEA] InterPro:IPR000571) /// 0003723 // RNA binding (GO_REF:0000037 [IEA] UniProtKB-KW:KW-0694)	Putative cleavage and polyadenylation specificity factor subunit 4-like protein	CPS4L_HUMAN|CPSF4L	protein	taxon:9606	20130119	UniProtKB			0.156382	1.13718	1	0	647	30	39	1	1	1	0	0	1	1
ELTD1	0.133477	0.133477	0.133477	3.38711	1.64859	1.64859	1.64859	5.0545	1.64859e-06	5.0545	1.05072	0.293389	1	1	1.64859e-06	5.0545	1.05072	0.293389	1	1	UniProtKB	B1AR72, Q9HBW9	ELTD1		0007218 // neuropeptide signaling pathway (GO_REF:0000002 [IEA] InterPro:IPR000203) /// 0007186 // G-protein coupled receptor protein signaling pathway (PMID:15203201 [TAS])	0005886 // plasma membrane (GO_REF:0000038 [IEA] UniProtKB-KW:KW-1003) /// 0005886 // plasma membrane (GO_REF:0000039 [IEA] UniProtKB-SubCell:SL-0039) /// 0016021 // integral to membrane (GO_REF:0000037 [IEA] UniProtKB-KW:KW-0812) /// 0016021 // integral to membrane (GO_REF:0000038 [IEA] UniProtKB-KW:KW-0812)	0004930 // G-protein coupled receptor activity (GO_REF:0000037 [IEA] UniProtKB-KW:KW-0297) /// 0004930 // G-protein coupled receptor activity (GO_REF:0000002 [IEA] InterPro:IPR000832|InterPro:IPR017983) /// 0046983 // protein dimerization activity (GO_REF:0000019 [IEA] Ensembl:ENSRNOP00000045890) /// 0005509 // calcium ion binding (GO_REF:0000002 [IEA] InterPro:IPR001881|InterPro:IPR018097)	EGF, latrophilin and seven transmembrane domain-containing protein 1	B1AR72_HUMAN|ELTD1|RP11-143H12.1-002	protein	taxon:9606	20130119	InterPro			0.0559157	0.406607	1	1	3619	76	77	2	2	1	0	0	0	0
ENKUR	0.0646137	0.0646137	0.0646137	3.38711	0.798052	0.798052	0.798052	5.0545	7.98052e-07	5.0545	0.731047	0.464751	1	1	7.98052e-07	5.0545	0.731047	0.464751	1	1	UniProtKB	Q8TC29	ENKUR			0005929 // cilium (GO_REF:0000037 [IEA] UniProtKB-KW:KW-0969)	0017124 // SH3 domain binding (GO_REF:0000037 [IEA] UniProtKB-KW:KW-0729) /// 0005516 // calmodulin binding (GO_REF:0000037 [IEA] UniProtKB-KW:KW-0112)	Enkurin	ENKUR_HUMAN|C10orf63|ENKUR	protein	taxon:9606	20130119	UniProtKB			0.0270678	0.196831	2	0	3738	72	104	1	1	1	0	0	0	0
FUZ	0.138331	0.138331	0.138331	3.38711	1.70854	1.70854	1.70854	5.0545	1.70854e-06	5.0545	1.06965	0.284776	1	1	1.70854e-06	5.0545	1.06965	0.284776	1	1	UniProtKB	Q9BT04	FUZ		0048704 // embryonic skeletal system morphogenesis (GO_REF:0000024 [ISS] UniProtKB:Q3UYI6) /// 0042384 // cilium assembly (GO_REF:0000024 [ISS] UniProtKB:Q3UYI6) /// 0001843 // neural tube closure (GO_REF:0000024 [ISS] UniProtKB:Q3UYI6) /// 0010172 // embryonic body morphogenesis (GO_REF:0000024 [ISS] UniProtKB:Q3UYI6) /// 0008589 // regulation of smoothened signaling pathway (GO_REF:0000024 [ISS…	0005856 // cytoskeleton (GO_REF:0000039 [IEA] UniProtKB-SubCell:SL-0090) /// 0005737 // cytoplasm (GO_REF:0000039 [IEA] UniProtKB-SubCell:SL-0086)		Protein fuzzy homolog	FUZZY_HUMAN|FY|FUZ	protein	taxon:9606	20110413	UniProtKB			0.0579493	0.421395	2	0	1746	2	2	1	1	1	0	0	0	0
G6PC	0.0580452	0.0580452	0.0580452	3.38711	0.716923	0.716923	0.716923	5.0545	7.16923e-07	5.0545	0.692893	0.488377	1	1	7.16923e-07	5.0545	0.692893	0.488377	1	1	UniProtKB	K7ELS6, P35575	G6PC		0008202 // steroid metabolic process (GO_REF:0000019 [IEA] Ensembl:ENSMUSP00000019469) /// 0006641 // triglyceride metabolic process (GO_REF:0000019 [IEA] Ensembl:ENSMUSP00000019469) /// 0008645 // hexose transport (Reactome:REACT_9441 [TAS]) /// 0015758 // glucose transport (Reactome:REACT_212 [TAS]) /// 0044281 /// 0006094 // gluconeogenesis (GO_REF:0000041 [IEA] UniPathway:UPA00138) /// 001576…	0030176 // integral to endoplasmic reticulum membrane (PMID:10318794 [TAS]) /// 0016020 // membrane (GO_REF:0000002 [IEA] InterPro:IPR000326) /// 0016021 // integral to membrane (PMID:10318794 [IDA]) /// 0005789 // endoplasmic reticulum membrane (Reactome:REACT_1682 [TAS])	0004346 // glucose-6-phosphatase activity (PMID:8211187 [IDA]) /// 0042301 // phosphate binding (PMID:12093795 [IMP]) /// 0004346 // glucose-6-phosphatase activity (PMID:10318794 [IDA]) /// 0004346 // glucose-6-phosphatase activity (PMID:15661744 [IDA]) /// 0016773 // phosphotransferase activity, alcohol group as acceptor (GO_REF:0000019 [IEA] Ensembl:ENSMUSP00000019469) /// 0003824 // catalytic …	Glucose-6-phosphatase	K7ELS6_HUMAN|G6PC	protein	taxon:9606	20130119	InterPro			0.0243161	0.176822	2	0	4161	8	8	1	1	1	0	0	0	0
GNG7	0.17065	0.17065	0.17065	3.38711	2.10771	2.10771	2.10771	5.0545	2.10771e-06	5.0545	1.18805	0.234813	1	1	2.10771e-06	5.0545	1.18805	0.234813	1	1	UniProtKB	K7ESC6, O60262	GNG7		0001662 // behavioral fear response (GO_REF:0000019 [IEA] Ensembl:ENSMUSP00000089936) /// 0006112 // energy reserve metabolic process (Reactome:REACT_1505 [TAS]) /// 0007626 // locomotory behavior (GO_REF:0000019 [IEA] Ensembl:ENSMUSP00000089936) /// 0044281 /// 0045761 // regulation of adenylate cyclase activity (GO_REF:0000019 [IEA] Ensembl:ENSMUSP00000089936) /// 0007186 // G-protein coupled r…	0005834 // heterotrimeric G-protein complex (GO_REF:0000002 [IEA] InterPro:IPR001770|InterPro:IPR015898) /// 0005886 // plasma membrane (Reactome:REACT_25066 [TAS]) /// 0005886 // plasma membrane (Reactome:REACT_22110 [TAS])	0004871 // signal transducer activity (GO_REF:0000019 [IEA] Ensembl:ENSMUSP00000089936) /// 0004871 // signal transducer activity (GO_REF:0000002 [IEA] InterPro:IPR001770|InterPro:IPR015898)	Guanine nucleotide-binding protein G(I)/G(S)/G(O) subunit gamma-7	K7ESC6_HUMAN|GNG7	protein	taxon:9606	20130119	InterPro			0.071488	0.519846	1	1	4246	254	297	3	3	1	0	0	0	0
IGLON5	0.0779116	0.0779116	0.0779116	3.38711	0.962296	0.962296	0.962296	5.0545	9.62296e-07	5.0545	0.802757	0.422115	1	1	9.62296e-07	5.0545	0.802757	0.422115	1	1	UniProtKB	A6NGN9	IGLON5			0005576 // extracellular region (GO_REF:0000039 [IEA] UniProtKB-SubCell:SL-0243)		IgLON family member 5	IGLO5_HUMAN|IGLON5	protein	taxon:9606	20130119	UniProtKB			0.0326385	0.23734	1	1	3100	25	27	1	1	1	0	0	0	0
ISL2	0.13433	0.13433	0.13433	3.38711	1.65913	1.65913	1.65913	5.0545	1.65913e-06	5.0545	1.05407	0.29185	1	1	1.65913e-06	5.0545	1.05407	0.29185	1	1	UniProtKB	H0YKY2, Q96A47, H0YN25	ISL2		0045665 // negative regulation of neuron differentiation (GO_REF:0000019 [IEA] Ensembl:ENSMUSP00000034869) /// 0021520 // spinal cord motor neuron cell fate specification (GO_REF:0000019 [IEA] Ensembl:ENSMUSP00000034869) /// 0048935 // peripheral nervous system neuron development (PMID:20096094 [TAS]) /// 0021524 // visceral motor neuron differentiation (GO_REF:0000019 [IEA] Ensembl:ENSMUSP000000…	0005634 // nucleus (PMID:17091338 [IC] GO:0003677) /// 0005622 // intracellular (GO_REF:0000019 [IEA] Ensembl:ENSMUSP00000034869)	0008270 // zinc ion binding (GO_REF:0000002 [IEA] InterPro:IPR001781) /// 0046872 // metal ion binding (GO_REF:0000037 [IEA] UniProtKB-KW:KW-0479) /// 0003677 // DNA binding (PMID:17091338 [ISS] UniProtKB:P61371) /// 0043565 // sequence-specific DNA binding (GO_REF:0000002 [IEA] InterPro:IPR001356|InterPro:IPR017970) /// 0003700 // transcription factor activity (GO_REF:0000002 [IEA] InterPro:IPR0…	Insulin gene enhancer protein ISL-2	H0YKY2_HUMAN|ISL2	protein	taxon:9606	20130119	ENSEMBL			0.0562733	0.409207	1	1	1798	6	6	1	1	1	0	0	0	0
KALRN	0.0193113	0.0193113	0.0193113	3.38711	0.238516	0.238516	0.238516	5.0545	2.38516e-07	5.0545	0.399658	0.689409	1	1	2.38516e-07	5.0545	0.399658	0.689409	1	1	UniProtKB	J3QSW6, O60229, C9IZQ6, E7EUZ8, C9JQ37, H7BXZ5	KALRN		0035023 // regulation of Rho protein signal transduction (GO_REF:0000002 [IEA] InterPro:IPR000219) /// 0007165 // signal transduction (PMID:9285789 [TAS]) /// 0006915 // apoptosis (Reactome:REACT_13638 [TAS]) /// 0035556 /// 0007399 // nervous system development (GO_REF:0000024 [ISS] UniProtKB:P97924) /// 0048011 // nerve growth factor receptor signaling pathway (Reactome:REACT_11061 [TAS]) /// 0…	0005829 // cytosol (Reactome:REACT_9982 [TAS]) /// 0043025 // cell soma (GO_REF:0000019 [IEA] Ensembl:ENSRNOP00000062745) /// 0043005 // neuron projection (GO_REF:0000019 [IEA] Ensembl:ENSRNOP00000062745) /// 0005622 // intracellular (GO_REF:0000002 [IEA] InterPro:IPR000219) /// 0048471 // perinuclear region of cytoplasm (GO_REF:0000019 [IEA] Ensembl:ENSRNOP00000062745) /// 0015629 // actin cytos…	0005524 // ATP binding (GO_REF:0000037 [IEA] UniProtKB-KW:KW-0067) /// 0046872 // metal ion binding (GO_REF:0000037 [IEA] UniProtKB-KW:KW-0479) /// 0005089 // Rho guanyl-nucleotide exchange factor activity (GO_REF:0000002 [IEA] InterPro:IPR000219) /// 0005524 // ATP binding (GO_REF:0000038 [IEA] UniProtKB-KW:KW-0067) /// 0004674 // protein serine/threonine kinase activity (GO_REF:0000037 [IEA] Un…	HCG2022551, isoform CRA_j	C9IZQ6_HUMAN|hCG_2022551|KALRN	protein	taxon:9606	20130119	InterPro			0.00808982	0.0588275	3	0	12507	489	584	1	1	1	1	1	0	0
KIAA1614	0.058129	0.058129	0.058129	3.38711	0.717959	0.717959	0.717959	5.0545	7.17959e-07	5.0545	0.693393	0.488063	1	1	7.17959e-07	5.0545	0.693393	0.488063	1	1																0.0243512	0.177077	1	1	4155	26	27	1	1	1	0	0	0	0
LENG1 (NW_003571054 130488..134558)	0.271378	0.271378	0.271378	3.38711	3.35182	3.35182	3.35182	5.0545	3.35182e-06	5.0545	1.4982	0.134081	1	1	3.35182e-06	5.0545	1.4982	0.134081	1	1																0.113685	0.826691	1	1	890	1	4	1	1	1	1	1	0	0
LOC100996341	0.175464	0.175464	0.175464	3.38711	2.16718	2.16718	2.16718	5.0545	2.16718e-06	5.0545	1.20469	0.228321	1	1	2.16718e-06	5.0545	1.2047	0.228321	1	1																0.0735048	0.534511	1	1	2753	2	2	2	2	1	0	0	0	0
MAGEC3	0.0897533	0.0897533	0.0897533	3.38711	1.10855	1.10855	1.10855	5.0545	1.10855e-06	5.0545	0.861605	0.388905	1	1	1.10855e-06	5.0545	0.861605	0.388905	1	1																0.0375992	0.273413	2	0	2691	33	34	1	1	1	0	0	1	1
MEGF10	0.0314119	0.0314119	0.0314119	3.38711	0.387972	0.387972	0.387972	5.0545	3.87972e-07	5.0545	0.509718	0.610249	1	1	3.87972e-07	5.0545	0.509718	0.610249	1	1	UniProtKB	Q96KG7	MEGF10		0034109 // homotypic cell-cell adhesion (PMID:22407321 [IDA]) /// 0048641 // regulation of skeletal muscle tissue development (PMID:22101682 [IMP]) /// 0051147 // regulation of muscle cell differentiation (PMID:22101682 [IMP]) /// 0014719 // satellite cell activation (GO_REF:0000024 [ISS] UniProtKB:Q6DIB5) /// 0014841 // satellite cell proliferation (GO_REF:0000024 [ISS] UniProtKB:Q6DIB5) /// 005…	0042995 // cell projection (GO_REF:0000037 [IEA] UniProtKB-KW:KW-0966) /// 0001891 // phagocytic cup (GO_REF:0000039 [IEA] UniProtKB-SubCell:SL-0473) /// 0016021 // integral to membrane (GO_REF:0000037 [IEA] UniProtKB-KW:KW-0812) /// 0016323 // basolateral plasma membrane (GO_REF:0000039 [IEA] UniProtKB-SubCell:SL-0026)		Multiple epidermal growth factor-like domains protein 10	MEG10_HUMAN|KIAA1780|MEGF10	protein	taxon:9606	20130119	UniProtKB			0.013159	0.0956893	2	0	7689	72	73	0	1	0	0	0	0	0
MMP11	0.106823	0.106823	0.106823	3.38711	1.31938	1.31938	1.31938	5.0545	1.31938e-06	5.0545	0.939971	0.347232	1	1	1.31938e-06	5.0545	0.939972	0.347232	1	1	UniProtKB	P24347, F8WDI7, E9PED7, H7C3I7	MMP11		0030574 // collagen catabolic process (GO_REF:0000037 [IEA] UniProtKB-KW:KW-0177) /// 0006508 // proteolysis (GO_REF:0000037 [IEA] UniProtKB-KW:KW-0645) /// 0007275 // multicellular organismal development (PMID:7746327 [TAS]) /// 0006508 // proteolysis (GO_REF:0000002 [IEA] InterPro:IPR001818) /// 0030198 // extracellular matrix organization (Reactome:REACT_118779 [TAS]) /// 0022617 // extracellu…	0005576 // extracellular region (Reactome:REACT_118812 [TAS]) /// 0031012 // extracellular matrix (GO_REF:0000002 [IEA] InterPro:IPR001818) /// 0005578 // proteinaceous extracellular matrix (GO_REF:0000039 [IEA] UniProtKB-SubCell:SL-0111) /// 0005796 // Golgi lumen (Reactome:REACT_118812 [TAS]) /// 0031012 // extracellular matrix (GO_REF:0000002 [IEA] InterPro:IPR001818|InterPro:IPR021158|InterPr…	0008270 // zinc ion binding (GO_REF:0000002 [IEA] InterPro:IPR001818) /// 0004222 // metalloendopeptidase activity (GO_REF:0000002 [IEA] InterPro:IPR001818|InterPro:IPR021158|InterPro:IPR021190) /// 0005509 // calcium ion binding (GO_REF:0000002 [IEA] InterPro:IPR016293) /// 0004222 // metalloendopeptidase activity (GO_REF:0000002 [IEA] InterPro:IPR001818|InterPro:IPR016293|InterPro:IPR021158|Int…	Stromelysin-3	E9PED7_HUMAN|MMP11	protein	taxon:9606	20130119	InterPro			0.0447498	0.325411	1	1	2261	6	6	1	1	1	0	0	0	0
MMP21	0.12586	0.12586	0.12586	3.38711	1.55452	1.55452	1.55452	5.0545	1.55452e-06	5.0545	1.0203	0.307587	1	1	1.55452e-06	5.0545	1.0203	0.307587	1	1	UniProtKB	Q8N119	MMP21		0006508 // proteolysis (GO_REF:0000037 [IEA] UniProtKB-KW:KW-0645)	0031012 // extracellular matrix (GO_REF:0000002 [IEA] InterPro:IPR001818|InterPro:IPR021190) /// 0005576 // extracellular region (GO_REF:0000039 [IEA] UniProtKB-SubCell:SL-0243)	0008270 // zinc ion binding (GO_REF:0000002 [IEA] InterPro:IPR001818|InterPro:IPR006026|InterPro:IPR016293|InterPro:IPR021190) /// 0004222 // metalloendopeptidase activity (GO_REF:0000002 [IEA] InterPro:IPR001818|InterPro:IPR016293|InterPro:IPR021190) /// 0005509 // calcium ion binding (GO_REF:0000002 [IEA] InterPro:IPR016293)	Matrix metalloproteinase-21	MMP21_HUMAN|MMP21	protein	taxon:9606	20130119	InterPro			0.0527251	0.383405	1	1	1919	6	6	1	1	1	1	1	0	0
NPFF	0.407983	0.407983	0.407983	3.38711	5.03905	5.03905	5.03905	5.0545	5.03905e-06	5.0545	1.83698	0.0662127	1	1	5.03905e-06	5.0545	1.83698	0.0662127	1	1	UniProtKB	O15130	NPFF		0007218 // neuropeptide signaling pathway (GO_REF:0000037 [IEA] UniProtKB-KW:KW-0527) /// 0007268 // synaptic transmission (PMID:9224703 [TAS])	0005576 // extracellular region (Reactome:REACT_15291 [TAS]) /// 0005576 // extracellular region (Reactome:REACT_17045 [TAS]) /// 0005576 // extracellular region (Reactome:REACT_22436 [TAS]) /// 0005576 // extracellular region (Reactome:REACT_22263 [TAS])	0005184 // neuropeptide hormone activity (GO_REF:0000002 [IEA] InterPro:IPR008065) /// 0005102 // receptor binding (PMID:9224703 [TAS]) /// 0005102 // receptor binding (PMID:10851242 [TAS])	FMRFamide-related peptides	NPFF_HUMAN|NPFF	protein	taxon:9606	20030904	PINC			0.170911	1.24283	1	0	592	2	2	1	1	1	0	0	1	1
NUGGC	0.0621369	0.0621369	0.0621369	3.38711	0.76746	0.76746	0.76746	5.0545	7.6746e-07	5.0545	0.716898	0.473437	1	1	7.6746e-07	5.0545	0.716898	0.473437	1	1	UniProtKB	Q68CJ6	NUGGC			0005634 // nucleus (PMID:18029348 [IDA]) /// 0005730 // nucleolus (PMID:18029348 [IDA])	0005525 // GTP binding (GO_REF:0000037 [IEA] UniProtKB-KW:KW-0342) /// 0003924 // GTPase activity (GO_REF:0000002 [IEA] InterPro:IPR001401)	Nuclear GTPase SLIP-GC	SLIP_HUMAN|HMFN0672|C8orf80|NUGGC	protein	taxon:9606	20130119	InterPro			0.0260302	0.189286	1	1	3887	40	41	1	1	1	0	0	0	0
OFCC1	0.0922559	0.0922559	0.0922559	3.38711	1.13946	1.13946	1.13946	5.0545	1.13946e-06	5.0545	0.873535	0.382372	1	1	1.13946e-06	5.0545	0.873535	0.382372	1	1	UniProtKB	E9PHR2	OFCC1			0015630 // microtubule cytoskeleton (GO_REF:0000019 [IEA] Ensembl:ENSMUSP00000062217) /// 0005783 // endoplasmic reticulum (GO_REF:0000019 [IEA] Ensembl:ENSMUSP00000062217) /// 0048471 // perinuclear region of cytoplasm (GO_REF:0000019 [IEA] Ensembl:ENSMUSP00000062217) /// 0005829 // cytosol (GO_REF:0000019 [IEA] Ensembl:ENSMUSP00000062217)		Orofacial cleft 1 candidate gene 1 protein	E9PHR2_HUMAN|OFCC1	protein	taxon:9606	20130119	ENSEMBL			0.0386476	0.281037	1	0	2618	149	167	0	1	0	0	0	0	1
PLA2G10	0.242253	0.242253	0.242253	3.38711	2.99209	2.99209	2.99209	5.0545	2.99209e-06	5.0545	1.41553	0.156915	1	1	2.99209e-06	5.0545	1.41553	0.156915	1	1	UniProtKB	O15496, H3BRW4	PLA2G10		0036151 /// 0036152 /// 0010744 // positive regulation of foam cell differentiation (PMID:18511424 [IC] GO:0019915) /// 0032308 // positive regulation of prostaglandin secretion (PMID:18511424 [IMP]) /// 0090370 /// 0043030 // regulation of macrophage activation (PMID:18511424 [IMP]) /// 0036150 /// 0007411 // axon guidance (PMID:15927955 [IDA]) /// 0043433 // negative regulation of transcription…	0005576 // extracellular region (Reactome:REACT_120974 [TAS]) /// 0005576 // extracellular region (GO_REF:0000038 [IEA] UniProtKB-KW:KW-0964) /// 0005576 // extracellular region (Reactome:REACT_120937 [TAS]) /// 0005576 // extracellular region (Reactome:REACT_121220 [TAS]) /// 0005576 // extracellular region (Reactome:REACT_120742 [TAS]) /// 0005576 // extracellular region (Reactome:REACT_121397 …	0004620 // phospholipase activity (PMID:20844270 [ISS] UniProtKB:Q9QXX3) /// 0005509 // calcium ion binding (GO_REF:0000002 [IEA] InterPro:IPR001211) /// 0004623 // phospholipase A2 activity (GO_REF:0000002 [IEA] InterPro:IPR001211|InterPro:IPR013090) /// 0004623 // phospholipase A2 activity (GO_REF:0000003 [IEA] EC:3.1.1.4)	HCG1746186, isoform CRA_a	H3BRW4_HUMAN|hCG_1746186|PLA2G10	protein	taxon:9606	20130119	InterPro			0.101484	0.737969	1	0	997	22	32	0	1	0	0	0	0	1
PP2D1	0.226785	0.226785	0.226785	3.38711	2.80105	2.80105	2.80105	5.0545	2.80105e-06	5.0545	1.36959	0.170815	1	1	2.80105e-06	5.0545	1.36959	0.170815	1	1	UniProtKB	A8MPX8	PP2D1				0003824 // catalytic activity (GO_REF:0000002 [IEA] InterPro:IPR001932)	Protein phosphatase 2C-like domain-containing protein 1	PP2D1_HUMAN|PP2D1|C3orf48	protein	taxon:9606	20130119	InterPro			0.0950041	0.69085	1	1	2130	51	72	2	2	1	0	0	0	0
PURG	0.0640993	0.0640993	0.0640993	3.38711	0.791698	0.791698	0.791698	5.0545	7.91698e-07	5.0545	0.728131	0.466534	1	1	7.91698e-07	5.0545	0.728131	0.466534	1	1	UniProtKB	Q9UJV8	PURG			0005634 // nucleus (GO_REF:0000039 [IEA] UniProtKB-SubCell:SL-0191)	0003677 // DNA binding (GO_REF:0000037 [IEA] UniProtKB-KW:KW-0238)	Purine-rich element-binding protein gamma	PURG_HUMAN|PURG	protein	taxon:9606	20130119	UniProtKB			0.0268523	0.195264	2	1	3768	19	22	1	1	1	0	0	0	0
PYHIN1	0.115397	0.115397	0.115397	3.38711	1.42528	1.42528	1.42528	5.0545	1.42528e-06	5.0545	0.976968	0.328585	1	1	1.42528e-06	5.0545	0.976968	0.328585	1	1	UniProtKB	Q6K0P9	PYHIN1		0007049 // cell cycle (GO_REF:0000037 [IEA] UniProtKB-KW:KW-0131)	0016607 // nuclear speck (GO_REF:0000039 [IEA] UniProtKB-SubCell:SL-0186)		Pyrin and HIN domain-containing protein 1	IFIX_HUMAN|PYHIN1|IFIX	protein	taxon:9606	20130119	UniProtKB			0.0483418	0.351531	4	0	2093	20	22	1	1	1	0	0	1	1
SCN11A	0.0743157	0.0743157	0.0743157	3.38711	0.917882	0.917882	0.917882	5.0545	9.17882e-07	5.0545	0.784013	0.433033	1	1	9.17882e-07	5.0545	0.784013	0.433033	1	1	UniProtKB	Q9UI33	SCN11A		0042493 // response to drug (PMID:10623608 [TAS]) /// 0006814 // sodium ion transport (PMID:10623608 [TAS])	0001518 // voltage-gated sodium channel complex (GO_REF:0000002 [IEA] InterPro:IPR001696|InterPro:IPR010526) /// 0044299	0005248 // voltage-gated sodium channel activity (GO_REF:0000019 [IEA] Ensembl:ENSMUSP00000065466)	Sodium channel protein type 11 subunit alpha	SCNBA_HUMAN|SCN11A|SCN12A|SNS2	protein	taxon:9606	20130119	InterPro			0.0311321	0.226386	1	0	6500	54	57	2	2	1	0	0	2	2
SLC22A12	0.0753356	0.0753356	0.0753356	3.38711	0.93048	0.93048	0.93048	5.0545	9.3048e-07	5.0545	0.789375	0.429893	1	1	9.3048e-07	5.0545	0.789375	0.429893	1	1	UniProtKB	Q96S37, B5ME56, G3XAN7	SLC22A12		0046415 // urate metabolic process (PMID:19503597 [IMP]) /// 0015747 // urate transport (PMID:12024214 [IDA]) /// 0055085 // transmembrane transport (Reactome:REACT_15518 [TAS]) /// 0055085 // transmembrane transport (GO_REF:0000002 [IEA] InterPro:IPR011701) /// 0015747 // urate transport (PMID:16775029 [IDA]) /// 0042493 // response to drug (PMID:12024214 [IDA]) /// 0055085 // transmembrane tran…	0005886 // plasma membrane (Reactome:REACT_22238 [TAS]) /// 0005886 // plasma membrane (PMID:16775029 [IDA]) /// 0016021 // integral to membrane (GO_REF:0000019 [IEA] Ensembl:ENSMUSP00000109078) /// 0031526 // brush border membrane (GO_REF:0000024 [ISS] UniProtKB:Q8CFZ5) /// 0016324 // apical plasma membrane (PMID:12024214 [IDA]) /// 0005886 // plasma membrane (PMID:14694169 [IDA]) /// 0016021 //…	0015143 // urate transmembrane transporter activity (PMID:12024214 [IDA]) /// 0015143 // urate transmembrane transporter activity (GO_REF:0000019 [IEA] Ensembl:ENSMUSP00000109078) /// 0030165 // PDZ domain binding (PMID:15304510 [IPI] UniProtKB:Q5T2W1)	Solute carrier family 22 member 12	B5ME56_HUMAN|SLC22A12	protein	taxon:9606	20130119	InterPro			0.0315594	0.229493	1	0	3206	5	5	1	1	1	0	0	1	1
SLC5A1	0.046128	0.046128	0.046128	3.38711	0.569732	0.569732	0.569732	5.0545	5.69732e-07	5.0545	0.617682	0.536785	1	1	5.69732e-07	5.0545	0.617682	0.536785	1	1	UniProtKB	P13866	SLC5A1		0005975 // carbohydrate metabolic process (Reactome:REACT_474 [TAS]) /// 0055085 // transmembrane transport (Reactome:REACT_15518 [TAS]) /// 0008645 // hexose transport (Reactome:REACT_9441 [TAS]) /// 0055085 // transmembrane transport (Reactome:REACT_19118 [TAS]) /// 0015758 // glucose transport (PMID:8563765 [IMP]) /// 0044281 /// 0050892 // intestinal absorption (GO_REF:0000019 [IEA] Ensembl:E…	0016324 // apical plasma membrane (GO_REF:0000019 [IEA] Ensembl:ENSMUSP00000011178) /// 0005886 // plasma membrane (Reactome:REACT_9525 [TAS]) /// 0005887 // integral to plasma membrane (PMID:8563765 [TAS]) /// 0031526 // brush border membrane (GO_REF:0000019 [IEA] Ensembl:ENSRNOP00000024165) /// 0016324 // apical plasma membrane (GO_REF:0000019 [IEA] Ensembl:ENSRNOP00000024165) /// 0005911 // ce…	0005412 // glucose:sodium symporter activity (PMID:8563765 [IDA]) /// 0005515 // protein binding (PMID:18455122 [IPI] UniProtKB:P00533)	Sodium/glucose cotransporter 1	SC5A1_HUMAN|NAGT|SLC5A1|SGLT1	protein	taxon:9606	20060106	MGI			0.0193238	0.140519	2	0	5236	62	68	1	1	1	0	0	0	0
SLITRK3	0.0572065	0.0572065	0.0572065	3.38711	0.706565	0.706565	0.706565	5.0545	7.06565e-07	5.0545	0.687869	0.491535	1	1	7.06565e-07	5.0545	0.687869	0.491535	1	1	UniProtKB	O94933, C9K0R4	SLITRK3		0007409 // axonogenesis (GO_REF:0000019 [IEA] Ensembl:ENSMUSP00000088561)	0016021 // integral to membrane (GO_REF:0000037 [IEA] UniProtKB-KW:KW-0812)		SLIT and NTRK-like protein 3	C9K0R4_HUMAN|SLITRK3	protein	taxon:9606	20130119	ENSEMBL			0.0239648	0.174267	1	1	4222	3	3	1	1	1	0	0	0	0
SULT1E1	0.135689	0.135689	0.135689	3.38711	1.67591	1.67591	1.67591	5.0545	1.67591e-06	5.0545	1.05939	0.289423	1	1	1.67591e-06	5.0545	1.05939	0.289423	1	1	UniProtKB	P49888, H0Y8G0	SULT1E1		0050427 // 3'-phosphoadenosine 5'-phosphosulfate metabolic process (Reactome:REACT_6913 [TAS]) /// 0008202 // steroid metabolic process (PMID:8185618 [TAS]) /// 0007565 // female pregnancy (GO_REF:0000019 [IEA] Ensembl:ENSMUSP00000031201) /// 0006805 // xenobiotic metabolic process (Reactome:REACT_6959 [TAS]) /// 0008210 // estrogen metabolic process (PMID:11884392 [IDA]) /// 0006805 // xenobioti…	0005634 // nucleus (PMID:18029348 [IDA]) /// 0005829 // cytosol (Reactome:REACT_6949 [TAS]) /// 0005737 // cytoplasm (PMID:18029348 [IDA]) /// 0005829 // cytosol (Reactome:REACT_6961 [TAS]) /// 0031965 // nuclear membrane (PMID:18029348 [IDA]) /// 0005829 // cytosol (Reactome:REACT_6874 [TAS]) /// 0005829 // cytosol (Reactome:REACT_6722 [TAS]) /// 0005829 // cytosol (Reactome:REACT_6969 [TAS]) //…	0050294 // steroid sulfotransferase activity (PMID:11884392 [IDA]) /// 0005496 // steroid binding (GO_REF:0000037 [IEA] UniProtKB-KW:KW-0754) /// 0047894 // flavonol 3-sulfotransferase activity (PMID:20056724 [IDA]) /// 0050294 // steroid sulfotransferase activity (Reactome:REACT_6949 [TAS]) /// 0004304 // estrone sulfotransferase activity (GO_REF:0000003 [IEA] EC:2.8.2.4) /// 0008146 // sulfotra…	Estrogen sulfotransferase	H0Y8G0_HUMAN|SULT1E1	protein	taxon:9606	20130119	InterPro			0.0568424	0.413346	1	1	1780	8	8	1	1	1	0	0	0	0
SYCE1	0.131122	0.131122	0.131122	3.38711	1.6195	1.6195	1.6195	5.0545	1.6195e-06	5.0545	1.04141	0.297687	1	1	1.6195e-06	5.0545	1.04141	0.297687	1	1	UniProtKB	Q8N0S2	SYCE1		0007130 // synaptonemal complex assembly (GO_REF:0000002 [IEA] InterPro:IPR026676) /// 0051301 // cell division (GO_REF:0000037 [IEA] UniProtKB-KW:KW-0132) /// 0007128 // meiotic prophase I (PMID:15944401 [IC] GO:0000801)	0000801 // central element (PMID:15944401 [ISS] UniProtKB:Q9D495)		Synaptonemal complex central element protein 1	SYCE1_HUMAN|C10orf94|SYCE1	protein	taxon:9606	20051124	HGNC			0.0549291	0.399433	3	0	1842	13	14	1	1	1	0	0	1	1
TAS2R13 (NW_003571047 106631..108268)	0.147542	0.147542	0.147542	3.38711	1.82231	1.82231	1.82231	5.0545	1.82231e-06	5.0545	1.10469	0.269294	1	1	1.82231e-06	5.0545	1.10469	0.269294	1	1																0.0618078	0.449453	1	1	1637	0	1	0	1	0	0	0	0	0
TBC1D3F	0.11382	0.11382	0.11382	3.38711	1.4058	1.4058	1.4058	5.0545	1.4058e-06	5.0545	0.970269	0.331912	1	1	1.4058e-06	5.0545	0.970269	0.331912	1	1	UniProtKB	F5GZ95, A6NFD7, A6NER0	TBC1D3F			0005622 // intracellular (GO_REF:0000002 [IEA] InterPro:IPR000195)	0005097 // Rab GTPase activator activity (GO_REF:0000002 [IEA] InterPro:IPR000195)	TBC1 domain family member 3F	TBC3F_HUMAN|TBC1D3F|TBC1D3E	protein	taxon:9606	20130119	InterPro			0.0476812	0.346727	1	1	2122	0	2	0	1	0	0	1	0	0
TBX21	0.0939059	0.0939059	0.0939059	3.38711	1.15984	1.15984	1.15984	5.0545	1.15984e-06	5.0545	0.881311	0.378149	1	1	1.15984e-06	5.0545	0.881312	0.378149	1	1	UniProtKB	Q9UL17	TBX21		0045893 // positive regulation of transcription, DNA-dependent (PMID:19805038 [IDA]) /// 0006355 // regulation of transcription, DNA-dependent (PMID:10761931 [TAS]) /// 0006351 // transcription, DNA-dependent (GO_REF:0000037 [IEA] UniProtKB-KW:KW-0804) /// 0072676 /// 0030217 // T cell differentiation (GO_REF:0000019 [IEA] Ensembl:ENSMUSP00000001484) /// 0007275 // multicellular organismal develo…	0043025 // cell soma (GO_REF:0000019 [IEA] Ensembl:ENSMUSP00000001484) /// 0005634 // nucleus (GO_REF:0000029 [NAS])	0044212 /// 0003700 // transcription factor activity (PMID:10761931 [TAS])	T-box transcription factor TBX21	TBX21_HUMAN|TBX21|TBET|TBLYM	protein	taxon:9606	20010904	UniProtKB			0.0393388	0.286063	1	1	2572	9	9	1	1	1	0	0	0	0
TDRD10	0.0955026	0.0955026	0.0955026	3.38711	1.17956	1.17956	1.17956	5.0545	1.17956e-06	5.0545	0.888772	0.374125	1	1	1.17956e-06	5.0545	0.888772	0.374126	1	1	UniProtKB	Q5VZ19	TDRD10				0003723 // RNA binding (GO_REF:0000037 [IEA] UniProtKB-KW:KW-0694) /// 0000166 // nucleotide binding (GO_REF:0000002 [IEA] InterPro:IPR012677)	Tudor domain-containing protein 10	TDR10_HUMAN|TDRD10|UNQ9380/PRO34205	protein	taxon:9606	20130119	InterPro			0.0400077	0.290927	2	0	2529	38	42	1	1	1	1	1	0	0
TECTA	0.0373417	0.0373417	0.0373417	3.38711	0.461212	0.461212	0.461212	5.0545	4.61212e-07	5.0545	0.55575	0.578382	1	1	4.61212e-07	5.0545	0.55575	0.578382	1	1	UniProtKB	O75443	TECTA		0007160 // cell-matrix adhesion (GO_REF:0000002 [IEA] InterPro:IPR003886) /// 0007605 // sensory perception of sound (GO_REF:0000037 [IEA] UniProtKB-KW:KW-1009)	0005578 // proteinaceous extracellular matrix (GO_REF:0000039 [IEA] UniProtKB-SubCell:SL-0111) /// 0005886 // plasma membrane (GO_REF:0000039 [IEA] UniProtKB-SubCell:SL-0039) /// 0031225 // anchored to membrane (GO_REF:0000037 [IEA] UniProtKB-KW:KW-0336)		Alpha-tectorin	TECTA_HUMAN|TECTA	protein	taxon:9606	20130119	UniProtKB			0.0156431	0.113753	1	1	6468	127	128	1	1	1	0	0	0	0
UTY	0.0651628	0.0651628	0.0651628	3.38711	0.804834	0.804834	0.804834	5.0545	8.04834e-07	5.0545	0.734147	0.462859	1	1	8.04834e-07	5.0545	0.734147	0.462859	1	1	UniProtKB	O14607	UTY		0016568 // chromatin modification (GO_REF:0000037 [IEA] UniProtKB-KW:KW-0156)	0005634 // nucleus (GO_REF:0000039 [IEA] UniProtKB-SubCell:SL-0191)	0046872 // metal ion binding (GO_REF:0000037 [IEA] UniProtKB-KW:KW-0479) /// 0016702 // oxidoreductase activity, acting on single donors with incorporation of molecular oxygen, incorporation of two atoms of oxygen (GO_REF:0000037 [IEA] UniProtKB-KW:KW-0223)	Histone demethylase UTY	UTY_HUMAN|UTY	protein	taxon:9606	20130119	UniProtKB			0.0272978	0.198504	25	0	7413	291	335	2	2	1	0	0	0	0
ZNF480	0.1528	0.1528	0.1528	3.38711	1.88725	1.88725	1.88725	5.0545	1.88725e-06	5.0545	1.1242	0.260927	1	1	1.88725e-06	5.0545	1.1242	0.260927	1	1	UniProtKB	Q8WV37, F8WEZ9	ZNF480		0006355 // regulation of transcription, DNA-dependent (GO_REF:0000037 [IEA] UniProtKB-KW:KW-0805) /// 0006355 // regulation of transcription, DNA-dependent (GO_REF:0000002 [IEA] InterPro:IPR001909) /// 0006351 // transcription, DNA-dependent (GO_REF:0000037 [IEA] UniProtKB-KW:KW-0804)	0005634 // nucleus (PMID:18029348 [IDA]) /// 0005737 // cytoplasm (PMID:18029348 [IDA]) /// 0005730 // nucleolus (PMID:18029348 [IDA])	0003676 // nucleic acid binding (GO_REF:0000002 [IEA] InterPro:IPR001909|InterPro:IPR013087) /// 0046872 // metal ion binding (GO_REF:0000037 [IEA] UniProtKB-KW:KW-0479) /// 0008270 // zinc ion binding (GO_REF:0000002 [IEA] InterPro:IPR007087|InterPro:IPR015880) /// 0046872 // metal ion binding (GO_REF:0000038 [IEA] UniProtKB-KW:KW-0479)	Zinc finger protein 480	F8WEZ9_HUMAN|ZNF480	protein	taxon:9606	20130119	InterPro			0.0640106	0.465471	1	1	4742	2	5	2	3	0.666667	2	2	0	0
ZNF773	0.109635	0.109635	0.109635	3.38711	1.35412	1.35412	1.35412	5.0545	1.35412e-06	5.0545	0.952265	0.340963	1	1	1.35412e-06	5.0545	0.952265	0.340963	1	1	UniProtKB	Q6PK81	ZNF773		0006355 // regulation of transcription, DNA-dependent (GO_REF:0000037 [IEA] UniProtKB-KW:KW-0805) /// 0006351 // transcription, DNA-dependent (GO_REF:0000037 [IEA] UniProtKB-KW:KW-0804)	0005634 // nucleus (GO_REF:0000039 [IEA] UniProtKB-SubCell:SL-0191)	0046872 // metal ion binding (GO_REF:0000037 [IEA] UniProtKB-KW:KW-0479) /// 0003677 // DNA binding (GO_REF:0000037 [IEA] UniProtKB-KW:KW-0238) /// 0008270 // zinc ion binding (GO_REF:0000002 [IEA] InterPro:IPR007087|InterPro:IPR015880)	Zinc finger protein 773	ZN773_HUMAN|ZNF419B|ZNF773	protein	taxon:9606	20130119	UniProtKB			0.045928	0.333979	1	1	2203	2	3	1	1	1	0	0	0	0
ACTN2	0.0533405	0.0533405	0.0533405	3.38711	0.658816	0.658816	0.658816	5.0545	6.58816e-07	5.0545	0.664219	0.50655	1	1	6.58816e-07	5.0545	0.66422	0.50655	1	1	UniProtKB	B2RCS5, P35609, B7Z4P8	ACTN2		0051289 // protein homotetramerization (PMID:9501083 [IDA]) /// 0006936 // muscle contraction (GO_REF:0000019 [IEA] Ensembl:ENSMUSP00000067708) /// 2000009 /// 0043267 // negative regulation of potassium ion transport (PMID:10812072 [IMP]) /// 0042391 // regulation of membrane potential (PMID:10812072 [IMP]) /// 1901018 /// 0030168 // platelet activation (Reactome:REACT_798 [TAS]) /// 1901017 ///…	0005829 // cytosol (Reactome:REACT_20601 [TAS]) /// 0005829 // cytosol (Reactome:REACT_20499 [TAS]) /// 0005829 // cytosol (Reactome:REACT_16935 [TAS]) /// 0030018 // Z disc (GO_REF:0000019 [IEA] Ensembl:ENSMUSP00000067708) /// 0005925 // focal adhesion (PMID:16807302 [IMP]) /// 0005829 // cytosol (Reactome:REACT_16995 [TAS]) /// 0005884 // actin filament (PMID:1339456 [TAS]) /// 0030864 // corti…	0005515 // protein binding (PMID:11309420 [IPI] UniProtKB:Q86TC9) /// 0030375 // thyroid hormone receptor coactivator activity (GO_REF:0000019 [IEA] Ensembl:ENSMUSP00000067708) /// 0042802 // identical protein binding (PMID:9501083 [IPI] UniProtKB:P35609) /// 0005515 // protein binding (PMID:11842093 [IPI] UniProtKB:Q9NP98) /// 0005178 // integrin binding (PMID:8104223 [TAS]) /// 0005515 // prote…	cDNA, FLJ96254, highly similar to Homo sapiens actinin, alpha 2 (ACTN2), mRNA	B2RCS5_HUMAN|ACTN2|hCG_1810883	protein	taxon:9606	20130119	UniProtKB			0.0223453	0.16249	1	1	4528	61	65	1	1	1	0	0	0	0
BEND2	0.0514213	0.0514213	0.0514213	3.38711	0.635111	0.635111	0.635111	5.0545	6.35111e-07	5.0545	0.652161	0.514298	1	1	6.35111e-07	5.0545	0.652161	0.514298	1	1																0.0215413	0.156644	2	1	4697	32	32	1	1	1	0	0	0	0
COL11A2 (NT_167249 4610635..4637414)	0.0383375	0.0383375	0.0383375	3.38711	0.473511	0.473511	0.473511	5.0545	4.73511e-07	5.0545	0.563112	0.573359	1	1	4.73511e-07	5.0545	0.563112	0.573359	1	1																0.0160602	0.116787	4	0	6300	0	2	0	1	0	0	0	0	1
COL21A1	0.115757	0.115757	0.115757	3.38711	1.42972	1.42972	1.42972	5.0545	1.42972e-06	5.0545	0.978489	0.327833	1	1	1.42972e-06	5.0545	0.978489	0.327833	1	1	UniProtKB	A6PVD9, Q96P44	COL21A1		0030198 // extracellular matrix organization (Reactome:REACT_118779 [TAS])	0005576 // extracellular region (Reactome:REACT_121366 [TAS]) /// 0005788 // endoplasmic reticulum lumen (Reactome:REACT_121254 [TAS]) /// 0005788 // endoplasmic reticulum lumen (Reactome:REACT_121366 [TAS]) /// 0005788 // endoplasmic reticulum lumen (Reactome:REACT_120939 [TAS]) /// 0031012 // extracellular matrix (PMID:20551380 [IDA]) /// 0005581 // collagen (GO_REF:0000037 [IEA] UniProtKB-KW:K…		Collagen type XXI alpha 1	A6PVD9_HUMAN|RP4-682J15.1-005|COL21A1	protein	taxon:9606	20130119	UniProtKB			0.0484924	0.352626	1	1	4173	159	170	2	2	1	1	1	1	1
CTCFL	0.0330269	0.0330269	0.0330269	3.38711	0.40792	0.40792	0.40792	5.0545	4.0792e-07	5.0545	0.522657	0.601213	1	1	4.0792e-07	5.0545	0.522657	0.601213	1	1	UniProtKB	Q8NI51, E7EUE3, F5H2V8, A6XGL8, A6XGM3	CTCFL		0006349 // genetic imprinting (GO_REF:0000024 [ISS] UniProtKB:A2APF3) /// 0016571 // histone methylation (GO_REF:0000024 [ISS] UniProtKB:A2APF3) /// 0007049 // cell cycle (GO_REF:0000037 [IEA] UniProtKB-KW:KW-0131) /// 0045893 // positive regulation of transcription, DNA-dependent (PMID:18413740 [IDA]) /// 0043046 // DNA methylation during gametogenesis (GO_REF:0000024 [ISS] UniProtKB:A2APF3) ///…	0005634 // nucleus (PMID:18029348 [IDA]) /// 0005737 // cytoplasm (PMID:18029348 [IDA]) /// 0005634 // nucleus (GO_REF:0000024 [ISS] UniProtKB:A2APF3)	0005515 // protein binding (PMID:18765639 [IPI] UniProtKB:P46379) /// 0044212 /// 0046872 // metal ion binding (GO_REF:0000037 [IEA] UniProtKB-KW:KW-0479) /// 0005515 // protein binding (PMID:18765639 [IPI] UniProtKB:O15047) /// 0003676 // nucleic acid binding (GO_REF:0000002 [IEA] InterPro:IPR013087) /// 0003677 // DNA binding (PMID:18413740 [IDA]) /// 0008270 // zinc ion binding (GO_REF:0000002…	Transcriptional repressor CTCFL	A6XGL8_HUMAN|CTCFL	protein	taxon:9606	20130119	InterPro			0.0138356	0.100609	16	0	7313	29	30	1	1	1	1	1	0	0
DGAT2L6	0.141409	0.141409	0.141409	3.38711	1.74656	1.74656	1.74656	5.0545	1.74656e-06	5.0545	1.08149	0.279481	1	1	1.74656e-06	5.0545	1.08149	0.279481	1	1	UniProtKB	Q6ZPD8	DGAT2L6		0006629 // lipid metabolic process (GO_REF:0000037 [IEA] UniProtKB-KW:KW-0443)	0005789 // endoplasmic reticulum membrane (GO_REF:0000039 [IEA] UniProtKB-SubCell:SL-0097) /// 0016021 // integral to membrane (GO_REF:0000037 [IEA] UniProtKB-KW:KW-0812)	0016747 // transferase activity, transferring acyl groups other than amino-acyl groups (GO_REF:0000002 [IEA] InterPro:IPR007130)	Diacylglycerol O-acyltransferase 2-like protein 6	DG2L6_HUMAN|DGAT2L6|DC3	protein	taxon:9606	20130119	UniProtKB			0.0592385	0.43077	1	1	1708	22	23	1	1	1	0	0	0	0
EBF3	0.054743	0.054743	0.054743	3.38711	0.676137	0.676137	0.676137	5.0545	6.76137e-07	5.0545	0.672895	0.501014	1	1	6.76137e-07	5.0545	0.672895	0.501014	1	1	UniProtKB	H0Y3W9, Q9H4W6	EBF3		0045893 // positive regulation of transcription, DNA-dependent (GO_REF:0000019 [IEA] Ensembl:ENSMUSP00000101724) /// 0007275 // multicellular organismal development (GO_REF:0000037 [IEA] UniProtKB-KW:KW-0217) /// 0006351 // transcription, DNA-dependent (GO_REF:0000037 [IEA] UniProtKB-KW:KW-0804) /// 0006355 // regulation of transcription, DNA-dependent (GO_REF:0000002 [IEA] InterPro:IPR003523)	0005634 // nucleus (GO_REF:0000039 [IEA] UniProtKB-SubCell:SL-0191)	0003677 // DNA binding (GO_REF:0000002 [IEA] InterPro:IPR003523) /// 0046872 // metal ion binding (GO_REF:0000037 [IEA] UniProtKB-KW:KW-0479) /// 0003677 // DNA binding (GO_REF:0000037 [IEA] UniProtKB-KW:KW-0238) /// 0046983 // protein dimerization activity (GO_REF:0000002 [IEA] InterPro:IPR011598)	Transcription factor COE3	H0Y3W9_HUMAN|EBF3	protein	taxon:9606	20130119	InterPro			0.0229328	0.166762	1	1	4412	89	92	1	1	1	0	0	0	0
EPHX3	0.124626	0.124626	0.124626	3.38711	1.53928	1.53928	1.53928	5.0545	1.53928e-06	5.0545	1.01529	0.30997	1	1	1.53928e-06	5.0545	1.01529	0.30997	1	1	UniProtKB	Q9H6B9	EPHX3		0008150 // biological_process (GO_REF:0000015 [ND])	0005576 // extracellular region (GO_REF:0000039 [IEA] UniProtKB-SubCell:SL-0243) /// 0005575 // cellular_component (GO_REF:0000015 [ND])	0003674 // molecular_function (GO_REF:0000015 [ND]) /// 0016787 // hydrolase activity (GO_REF:0000037 [IEA] UniProtKB-KW:KW-0378)	Epoxide hydrolase 3	EPHX3_HUMAN|ABHD9|EPHX3	protein	taxon:9606	20080407	UniProtKB			0.0522082	0.379647	2	0	1938	4	5	1	1	1	0	0	1	1
IGFALS	0.109785	0.109785	0.109785	3.38711	1.35596	1.35596	1.35596	5.0545	1.35596e-06	5.0545	0.952914	0.340634	1	1	1.35596e-06	5.0545	0.952914	0.340634	1	1	UniProtKB	P35858	IGFALS		0007165 // signal transduction (PMID:1384485 [TAS]) /// 0007155 // cell adhesion (GO_REF:0000037 [IEA] UniProtKB-KW:KW-0130)	0005576 // extracellular region (Reactome:REACT_15393 [TAS]) /// 0005634 // nucleus (PMID:18029348 [IDA]) /// 0005576 // extracellular region (Reactome:REACT_15373 [TAS]) /// 0005576 // extracellular region (Reactome:REACT_15355 [TAS]) /// 0005730 // nucleolus (PMID:18029348 [IDA]) /// 0005576 // extracellular region (Reactome:REACT_15475 [TAS]) /// 0005576 // extracellular region (Reactome:REACT…	0005520 // insulin-like growth factor binding (PMID:1379671 [TAS])	Insulin-like growth factor-binding protein complex acid labile subunit	ALS_HUMAN|ALS|IGFALS	protein	taxon:9606	20030904	PINC			0.0459906	0.334434	2	0	2200	10	10	1	1	1	0	0	0	0
ISM1	0.0931813	0.0931813	0.0931813	3.38711	1.15089	1.15089	1.15089	5.0545	1.15089e-06	5.0545	0.877905	0.379995	1	1	1.15089e-06	5.0545	0.877905	0.379995	1	1	UniProtKB	B1AKI9	ISM1			0005576 // extracellular region (GO_REF:0000039 [IEA] UniProtKB-SubCell:SL-0243)		Isthmin-1	ISM1_HUMAN|C20orf82|ISM1|ISM	protein	taxon:9606	20130119	UniProtKB			0.0390353	0.283856	1	1	2592	46	50	1	1	1	0	0	0	0
KCNT2	0.0408743	0.0408743	0.0408743	3.38711	0.504843	0.504843	0.504843	5.0545	5.04843e-07	5.0545	0.581444	0.560941	1	1	5.04843e-07	5.0545	0.581444	0.560941	1	1	UniProtKB	G8JLE3, Q6UVM3, Q3SY61	KCNT2		71805	0016020 // membrane (GO_REF:0000002 [IEA] InterPro:IPR003929) /// 0008076 // voltage-gated potassium channel complex (GO_REF:0000033 [IBA] PANTHER:PTN000002873)	0005524 // ATP binding (GO_REF:0000037 [IEA] UniProtKB-KW:KW-0067) /// 0015269 // calcium-activated potassium channel activity (GO_REF:0000033 [IBA] PANTHER:PTN000002873) /// 0005249 // voltage-gated potassium channel activity (GO_REF:0000033 [IBA] PANTHER:PTN000002873) /// 0015269 // calcium-activated potassium channel activity (GO_REF:0000002 [IEA] InterPro:IPR003929) /// 0000166 // nucleotide …	Potassium channel subfamily T member 2	G8JLE3_HUMAN|KCNT2	protein	taxon:9606	20130119	InterPro			0.0171229	0.124514	1	1	5909	251	275	1	1	1	1	1	0	0
LPO	0.0810762	0.0810762	0.0810762	3.38711	1.00138	1.00138	1.00138	5.0545	1.00138e-06	5.0545	0.818898	0.412845	1	1	1.00138e-06	5.0545	0.818898	0.412845	1	1	UniProtKB	J3KT11, J3QSD8, F5H386, P22079, H0Y3I2	LPO		0006979 // response to oxidative stress (PMID:8964511 [NAS]) /// 0042744 // hydrogen peroxide catabolic process (GO_REF:0000037 [IEA] UniProtKB-KW:KW-0376) /// 0006979 // response to oxidative stress (GO_REF:0000002 [IEA] InterPro:IPR002007|InterPro:IPR010255|InterPro:IPR019791) /// 0006979 // response to oxidative stress (GO_REF:0000002 [IEA] InterPro:IPR002007|InterPro:IPR010255)	0005575 // cellular_component (GO_REF:0000015 [ND]) /// 0005615 // extracellular space (GO_REF:0000039 [IEA] UniProtKB-SubCell:SL-0112)	0004601 // peroxidase activity (GO_REF:0000002 [IEA] InterPro:IPR002007|InterPro:IPR010255|InterPro:IPR019791) /// 0020037 // heme binding (GO_REF:0000002 [IEA] InterPro:IPR002007|InterPro:IPR010255) /// 0046872 // metal ion binding (GO_REF:0000037 [IEA] UniProtKB-KW:KW-0479) /// 0020037 // heme binding (GO_REF:0000002 [IEA] InterPro:IPR002007|InterPro:IPR010255|InterPro:IPR019791) /// 0004601 //…	Lactoperoxidase	F5H386_HUMAN|LPO	protein	taxon:9606	20130119	InterPro			0.0339642	0.246981	2	0	2979	26	28	1	1	1	0	0	0	0
LRRN1	0.0631771	0.0631771	0.0631771	3.38711	0.780308	0.780308	0.780308	5.0545	7.80308e-07	5.0545	0.722874	0.469757	1	1	7.80308e-07	5.0545	0.722874	0.469757	1	1	UniProtKB	Q6UXK5	LRRN1			0016021 // integral to membrane (GO_REF:0000037 [IEA] UniProtKB-KW:KW-0812)		Leucine-rich repeat neuronal protein 1	LRRN1_HUMAN|LRRN1|KIAA1497|Nbla10449|UNQ693/PRO1338	protein	taxon:9606	20130119	UniProtKB			0.026466	0.192455	1	1	3823	44	48	1	1	1	0	0	0	0
MADCAM1	0.157141	0.157141	0.157141	3.38711	1.94087	1.94087	1.94087	5.0545	1.94087e-06	5.0545	1.14006	0.254261	1	1	1.94087e-06	5.0545	1.14006	0.254261	1	1	UniProtKB	Q5UGI7, Q13477	MADCAM1		0050776 // regulation of immune response (Reactome:REACT_11152 [TAS]) /// 0009790 // embryonic development (GO_REF:0000019 [IEA] Ensembl:ENSRNOP00000010939) /// 0002687 // positive regulation of leukocyte migration (GO_REF:0000019 [IEA] Ensembl:ENSRNOP00000010939) /// 0007155 // cell adhesion (GO_REF:0000002 [IEA] InterPro:IPR015169) /// 0050900 // leukocyte migration (GO_REF:0000019 [IEA] Ensemb…	0005886 // plasma membrane (Reactome:REACT_11199 [TAS]) /// 0016020 // membrane (PMID:8502297 [TAS]) /// 0016020 // membrane (GO_REF:0000002 [IEA] InterPro:IPR015169) /// 0016021 // integral to membrane (GO_REF:0000037 [IEA] UniProtKB-KW:KW-0812) /// 0005886 // plasma membrane (Reactome:REACT_11230 [TAS])		Mucosal addressin cell adhesion molecule 1	MADCA_HUMAN|MADCAM1	protein	taxon:9606	20130119	ENSEMBL			0.0658292	0.478696	2	0	1537	9	9	1	1	1	0	0	0	0
MAGEB3	0.104738	0.104738	0.104738	3.38711	1.29363	1.29363	1.29363	5.0545	1.29363e-06	5.0545	0.930755	0.35198	1	1	1.29363e-06	5.0545	0.930755	0.35198	1	1																0.0438766	0.319061	1	0	2306	5	5	1	1	1	0	0	1	1
MASP1	0.0483342	0.0483342	0.0483342	3.38711	0.596982	0.596982	0.596982	5.0545	5.96982e-07	5.0545	0.632281	0.527203	1	1	5.96982e-07	5.0545	0.632281	0.527203	1	1	UniProtKB	C9JLU5, P48740, C9JMA2, F8W876	MASP1		0045087 // innate immune response (Reactome:REACT_6802 [TAS]) /// 0001867 // complement activation, lectin pathway (PMID:17182967 [IMP]) /// 0045916 // negative regulation of complement activation (PMID:11485744 [IDA]) /// 0001867 // complement activation, lectin pathway (GO_REF:0000019 [IEA] Ensembl:ENSMUSP00000087327) /// 0006508 // proteolysis (GO_REF:0000037 [IEA] UniProtKB-KW:KW-0645) /// 00…	0005615 // extracellular space (GO_REF:0000019 [IEA] Ensembl:ENSMUSP00000087327) /// 0005576 // extracellular region (Reactome:REACT_7959 [TAS]) /// 0005576 // extracellular region (Reactome:REACT_7965 [TAS]) /// 0005576 // extracellular region (Reactome:REACT_8002 [TAS]) /// 0005615 // extracellular space (PMID:11485744 [IDA]) /// 0005576 // extracellular region (Reactome:REACT_7983 [TAS])	0048306 // calcium-dependent protein binding (PMID:12421953 [IPI] UniProtKB:P11226) /// 0005515 // protein binding (PMID:10946292 [IPI] UniProtKB:P05155) /// 0048306 // calcium-dependent protein binding (PMID:18596036 [IPI] UniProtKB:P11226) /// 0004252 // serine-type endopeptidase activity (PMID:11527969 [IDA]) /// 0048306 // calcium-dependent protein binding (PMID:12421953 [IPI] UniProtKB:Q1548…	Mannan-binding lectin serine protease 1 heavy chain	C9JLU5_HUMAN|MASP1	protein	taxon:9606	20130119	ENSEMBL			0.020248	0.147239	3	1	9994	140	144	2	2	1	0	0	0	0
NLRP2 (NW_003571060 869084..903924)	0.0675597	0.0675597	0.0675597	3.38711	0.834439	0.834439	0.834439	5.0545	8.34439e-07	5.0545	0.747527	0.454746	1	1	8.34439e-07	5.0545	0.747527	0.454746	1	1																0.0283019	0.205806	4	0	3575	188	328	0	1	0	0	1	0	0
PLCL1	0.0365505	0.0365505	0.0365505	3.38711	0.45144	0.45144	0.45144	5.0545	4.5144e-07	5.0545	0.549832	0.582435	1	1	4.5144e-07	5.0545	0.549832	0.582435	1	1	UniProtKB	Q15111, H3BUD4, F8WAR2	PLCL1		0006629 // lipid metabolic process (GO_REF:0000002 [IEA] InterPro:IPR001192|InterPro:IPR001711|InterPro:IPR017946) /// 0035556 /// 0007610 // behavior (GO_REF:0000019 [IEA] Ensembl:ENSMUSP00000037854) /// 0006629 // lipid metabolic process (GO_REF:0000002 [IEA] InterPro:IPR001192)	0005622 // intracellular (GO_REF:0000002 [IEA] InterPro:IPR001192|InterPro:IPR001711) /// 0005622 // intracellular (GO_REF:0000002 [IEA] InterPro:IPR001192) /// 0005737 // cytoplasm (GO_REF:0000039 [IEA] UniProtKB-SubCell:SL-0086)	0004871 // signal transducer activity (GO_REF:0000038 [IEA] UniProtKB-KW:KW-0807) /// 0004871 // signal transducer activity (GO_REF:0000037 [IEA] UniProtKB-KW:KW-0807) /// 0004435 // phosphoinositide phospholipase C activity (GO_REF:0000002 [IEA] InterPro:IPR001192|InterPro:IPR001711) /// 0004435 // phosphoinositide phospholipase C activity (GO_REF:0000002 [IEA] InterPro:IPR001192) /// 0005509 //…	Inactive phospholipase C-like protein 1	F8WAR2_HUMAN|PLCL1	protein	taxon:9606	20130119	InterPro			0.0153117	0.111343	1	1	6608	202	216	1	1	1	0	0	0	0
RAD21L1	0.133587	0.133587	0.133587	3.38711	1.64995	1.64995	1.64995	5.0545	1.64995e-06	5.0545	1.05115	0.293189	1	1	1.64995e-06	5.0545	1.05115	0.293189	1	1	UniProtKB	Q9H4I0	RAD21L1		0007128 // meiotic prophase I (GO_REF:0000024 [ISS] UniProtKB:A2AU37) /// 0007059 // chromosome segregation (GO_REF:0000037 [IEA] UniProtKB-KW:KW-0159)	0005634 // nucleus (GO_REF:0000024 [ISS] UniProtKB:A2AU37) /// 0005694 // chromosome (GO_REF:0000024 [ISS] UniProtKB:A2AU37) /// 0030893 // meiotic cohesin complex (GO_REF:0000024 [ISS] UniProtKB:A2AU37) /// 0000228 // nuclear chromosome (GO_REF:0000002 [IEA] InterPro:IPR006909)		Double-strand-break repair protein rad21-like protein 1	RD21L_HUMAN|RAD21L1|RAD21L	protein	taxon:9606	20130119	InterPro			0.0559621	0.406944	1	1	1808	18	20	1	1	1	1	1	0	0
RAD51AP2	0.0672962	0.0672962	0.0672962	3.38711	0.831184	0.831184	0.831184	5.0545	8.31184e-07	5.0545	0.746067	0.455627	1	1	8.31184e-07	5.0545	0.746068	0.455627	1	1																0.0281915	0.205003	1	1	3589	6	7	1	1	1	0	0	0	0
TEX101	0.138888	0.138888	0.138888	3.38711	1.71542	1.71542	1.71542	5.0545	1.71542e-06	5.0545	1.0718	0.283808	1	1	1.71542e-06	5.0545	1.0718	0.283808	1	1	UniProtKB	Q9BY14	TEX101			0045121 // membrane raft (GO_REF:0000019 [IEA] Ensembl:ENSRNOP00000027202) /// 0005886 // plasma membrane (GO_REF:0000039 [IEA] UniProtKB-SubCell:SL-0039) /// 0031225 // anchored to membrane (GO_REF:0000037 [IEA] UniProtKB-KW:KW-0336) /// 0002080 // acrosomal membrane (GO_REF:0000019 [IEA] Ensembl:ENSMUSP00000077150)		Testis-expressed sequence 101 protein	TX101_HUMAN|TEX101|SGRG|UNQ867/PRO1884	protein	taxon:9606	20130119	ENSEMBL			0.0581825	0.423091	2	1	1739	156	188	1	1	1	0	0	0	0
IRF2	0.596448	0.596448	0.596448	3.24598	7.42301	7.42301	7.42301	4.84389	7.42301e-06	4.84389	2.20966	0.0271287	0.613873	1	7.42301e-06	4.84389	2.20966	0.0271287	0.613871	1	UniProtKB	H0Y956, D6RB34, P14316, D6RB08, K4DIA5, D6RED1, D6R9N5	IRF2		0000122 // negative regulation of transcription from RNA polymerase II promoter (PMID:7507207 [TAS]) /// 0019221 // cytokine-mediated signaling pathway (Reactome:REACT_25229 [TAS]) /// 0060333 // interferon-gamma-mediated signaling pathway (Reactome:REACT_25078 [TAS]) /// 0006351 // transcription, DNA-dependent (GO_REF:0000037 [IEA] UniProtKB-KW:KW-0804) /// 0060337 // type I interferon-mediated …	0005634 // nucleus (PMID:18029348 [IDA]) /// 0005730 // nucleolus (PMID:18029348 [IDA]) /// 0005925 // focal adhesion (PMID:18029348 [IDA]) /// 0005829 // cytosol (Reactome:REACT_25192 [TAS]) /// 0005829 // cytosol (Reactome:REACT_25082 [TAS]) /// 0005654 // nucleoplasm (Reactome:REACT_25232 [TAS])	0003700 // transcription factor activity (PMID:9540062 [IMP]) /// 0005515 // protein binding (PMID:21903422 [IPI] UniProtKB:P85037) /// 0003700 // transcription factor activity (GO_REF:0000002 [IEA] InterPro:IPR019817) /// 0003677 // DNA binding (PMID:9540062 [IDA]) /// 0005515 // protein binding (PMID:21903422 [IPI] UniProtKB:Q01167) /// 0000975 /// 0005515 // protein binding (PMID:9540062 [IPI]…	Interferon regulatory factor 2	D6R9N5_HUMAN|IRF2	protein	taxon:9606	20130119	InterPro			0.265563	1.93112	1	1	2286	789	920	6	6	1	0	0	2	2
MRAP	0.713475	0.713475	0.713475	3.17541	8.91633	8.91633	8.91633	4.73859	8.91633e-06	4.73859	2.41016	0.0159455	0.441938	1	8.91633e-06	4.73859	2.41016	0.0159455	0.441937	1	UniProtKB	Q8TCY5	MRAP		0034394 // protein localization at cell surface (PMID:19329486 [IDA]) /// 0030819 // positive regulation of cAMP biosynthetic process (PMID:19329486 [IDA]) /// 0050873 // brown fat cell differentiation (GO_REF:0000019 [IEA] Ensembl:ENSMUSP00000043890)	0005783 // endoplasmic reticulum (PMID:19329486 [IDA]) /// 0016021 // integral to membrane (GO_REF:0000037 [IEA] UniProtKB-KW:KW-0812) /// 0005886 // plasma membrane (PMID:19329486 [IDA]) /// 0048471 // perinuclear region of cytoplasm (GO_REF:0000039 [IEA] UniProtKB-SubCell:SL-0198)	0070996 /// 0031783 // type 5 melanocortin receptor binding (PMID:19329486 [IPI] UniProtKB:P33032) /// 0031781 // type 3 melanocortin receptor binding (PMID:19329486 [IPI] UniProtKB:P41968) /// 0031780 // adrenocorticotropin hormone receptor binding (PMID:19329486 [IPI] UniProtKB:Q01718) /// 0031782 // type 4 melanocortin receptor binding (PMID:19329486 [IPI] UniProtKB:P32245)	Melanocortin-2 receptor accessory protein	MRAP_HUMAN|C21orf61|MRAP|FALP	protein	taxon:9606	20100130	BHF-UCL			0.327972	2.38494	2	1	1234	72	98	1	4	0.25	0	0	1	2
NUDT3	0.266653	0.266653	0.266653	3.10485	3.34709	3.34709	3.34709	4.63329	3.34709e-06	4.63329	1.46928	0.141758	1	1	3.34709e-06	4.63329	1.46928	0.141758	1	1	UniProtKB	O95989	NUDT3		0007267 // cell-cell signaling (PMID:10419486 [TAS]) /// 0015961 // diadenosine polyphosphate catabolic process (PMID:10419486 [TAS]) /// 0071544	0005737 // cytoplasm (GO_REF:0000039 [IEA] UniProtKB-SubCell:SL-0086)	0000287 // magnesium ion binding (PMID:19585659 [IDA]) /// 0052840 /// 0008486 // diphosphoinositol-polyphosphate diphosphatase activity (PMID:10585413 [IDA]) /// 0052846 /// 0052845 /// 0052848 /// 0052847 /// 0052844 /// 0052843	Diphosphoinositol polyphosphate phosphohydrolase 1	NUDT3_HUMAN|DIPP|NUDT3|DIPP1	protein	taxon:9606	20100521	UniProtKB			0.126685	0.921229	1	1	2396	2	11	2	3	0.666667	2	2	0	0
PROX1	0.0732098	0.0732098	0.0732098	3.10485	0.918945	0.918945	0.918945	4.63329	9.18945e-07	4.63329	0.769864	0.441381	1	1	9.18945e-07	4.63329	0.769864	0.441381	1	1	UniProtKB	C9JU29, Q92786, J3KP66	PROX1		0001946 // lymphangiogenesis (PMID:12412020 [IDA]) /// 0021707 // cerebellar granule cell differentiation (GO_REF:0000024 [ISS] UniProtKB:P48437) /// 0045071 // negative regulation of viral genome replication (PMID:19264593 [IDA]) /// 0021542 // dentate gyrus development (GO_REF:0000024 [ISS] UniProtKB:P48437) /// 0048845 // venous blood vessel morphogenesis (GO_REF:0000024 [ISS] UniProtKB:P48437…	0005634 // nucleus (PMID:11850194 [IDA]) /// 0005634 // nucleus (PMID:19210544 [IDA]) /// 0005634 // nucleus (PMID:15205472 [IDA]) /// 0005634 // nucleus (GO_REF:0000002 [IEA] InterPro:IPR007738) /// 0005634 // nucleus (GO_REF:0000019 [IEA] Ensembl:ENSMUSP00000135703) /// 0005634 // nucleus (PMID:15143342 [IDA]) /// 0005737 // cytoplasm (GO_REF:0000019 [IEA] Ensembl:ENSMUSP00000135703) /// 000573…	0050693 // LBD domain binding (PMID:15205472 [IPI] UniProtKB:O00482) /// 0005515 // protein binding (PMID:18815287 [IPI] UniProtKB:P24468) /// 0044212 /// 0005515 // protein binding (PMID:21988832 [IPI] UniProtKB:P56545) /// 0003700 // transcription factor activity (PMID:19210544 [IC] GO:0044212) /// 0005515 // protein binding (PMID:19264593 [IPI] UniProtKB:O00482) /// 0003714 // transcription co…	Prospero homeobox protein 1	C9JU29_HUMAN|PROX1	protein	taxon:9606	20130119	ENSEMBL			0.0347815	0.252924	2	0	8727	26	26	3	3	1	0	0	0	0
CHMP3	0.324648	0.324648	0.324648	3.0484	4.09027	4.09027	4.09027	4.54905	4.09027e-06	4.54905	1.61742	0.105787	1	1	4.09027e-06	4.54905	1.61742	0.105787	1	1	UniProtKB	Q9Y3E7	CHMP3		0008333 // endosome to lysosome transport (GO_REF:0000019 [IEA] Ensembl:ENSRNOP00000010253) /// 0007049 // cell cycle (GO_REF:0000037 [IEA] UniProtKB-KW:KW-0131) /// 0000910 // cytokinesis (GO_REF:0000019 [IEA] Ensembl:ENSRNOP00000010253) /// 0006915 // apoptosis (GO_REF:0000037 [IEA] UniProtKB-KW:KW-0053) /// 0015031 // protein transport (GO_REF:0000037 [IEA] UniProtKB-KW:KW-0653) /// 0051036 //…	0005829 // cytosol (Reactome:REACT_27184 [TAS]) /// 0031902 // late endosome membrane (GO_REF:0000039 [IEA] UniProtKB-SubCell:SL-0151) /// 0005829 // cytosol (Reactome:REACT_27290 [TAS]) /// 0030496 // midbody (GO_REF:0000019 [IEA] Ensembl:ENSRNOP00000010253) /// 0005769 // early endosome (GO_REF:0000019 [IEA] Ensembl:ENSRNOP00000010253)	0005515 // protein binding (PMID:19615732 [IPI] UniProtKB:O95630) /// 0005515 // protein binding (PMID:17711858 [IPI] UniProtKB:O95630) /// 0005546 // phosphatidylinositol-4,5-bisphosphate binding (GO_REF:0000019 [IEA] Ensembl:ENSRNOP00000010253)	Charged multivesicular body protein 3	CHMP3_HUMAN|CHMP3|CGI149|CGI-149|NEDF|VPS24	protein	taxon:9606	20130119	ENSEMBL			0.158489	1.1525	3	1	3192	1	9	1	5	0.2	1	1	0	0
SRSF8 (NT_167190 40105850..40110183)	0.605996	0.605996	0.605996	2.99629	7.66264	7.66264	7.66264	4.47129	7.66264e-06	4.47129	2.20491	0.0274603	0.6191	1	7.66264e-06	4.47129	2.20491	0.0274603	0.619098	1																0.303562	2.20743	1	1	4333	0	13	0	13	0	0	0	0	0
BEST3	0.106279	0.106279	0.106279	2.96372	1.34702	1.34702	1.34702	4.42269	1.34702e-06	4.42269	0.92207	0.356492	1	1	1.34702e-06	4.42269	0.92207	0.356492	1	1	UniProtKB	Q8N1M1, F8VVZ2	BEST3		0008150 // biological_process (GO_REF:0000015 [ND]) /// 0043271 // negative regulation of ion transport (GO_REF:0000019 [IEA] Ensembl:ENSMUSP00000020378)	0034707 // chloride channel complex (GO_REF:0000037 [IEA] UniProtKB-KW:KW-0869) /// 0005886 // plasma membrane (GO_REF:0000039 [IEA] UniProtKB-SubCell:SL-0039)	0003674 // molecular_function (GO_REF:0000015 [ND]) /// 0005254 // chloride channel activity (GO_REF:0000019 [IEA] Ensembl:ENSMUSP00000020378)	Bestrophin-3	F8VVZ2_HUMAN|BEST3	protein	taxon:9606	20130119	ENSEMBL			0.0541211	0.393557	2	0	3739	27	31	2	2	1	0	0	0	0
MICB (NT_167246 2816314..2821820)	0.173148	0.173148	0.173148	2.96372	2.19456	2.19456	2.19456	4.42269	2.19456e-06	4.42269	1.17693	0.239224	1	1	2.19456e-06	4.42269	1.17693	0.239224	1	1																0.0881738	0.641181	1	1	2295	0	2	0	2	0	0	0	0	0
PODN	0.116294	0.116294	0.116294	2.96372	1.47396	1.47396	1.47396	4.42269	1.47396e-06	4.42269	0.964538	0.334776	1	1	1.47396e-06	4.42269	0.964538	0.334776	1	1	UniProtKB	Q7Z5L7	PODN		0030336 // negative regulation of cell migration (PMID:15063725 [IDA]) /// 0008285 // negative regulation of cell proliferation (PMID:15063725 [IDA])	0005578 // proteinaceous extracellular matrix (GO_REF:0000039 [IEA] UniProtKB-SubCell:SL-0111) /// 0005615 // extracellular space (PMID:15063725 [IDA]) /// 0005737 // cytoplasm (PMID:15063725 [IDA]) /// 0005615 // extracellular space (PMID:20551380 [IDA])	0005518 // collagen binding (PMID:15063725 [IDA])	Podocan	PODN_HUMAN|SLRR5A|UNQ293/PRO332|PODN	protein	taxon:9606	20100705	UniProtKB			0.0592212	0.430644	4	0	3417	11	11	2	2	1	0	0	2	2
RSPO2	0.126191	0.126191	0.126191	2.96372	1.5994	1.5994	1.5994	4.42269	1.5994e-06	4.42269	1.00474	0.31502	1	1	1.5994e-06	4.42269	1.00474	0.31502	1	1	UniProtKB	E5RHC3, Q6UXX9, E5RH25, E5RGU9, E5RJU7	RSPO2		0035115 // embryonic forelimb morphogenesis (GO_REF:0000019 [IEA] Ensembl:ENSMUSP00000067325) /// 0001649 // osteoblast differentiation (GO_REF:0000019 [IEA] Ensembl:ENSMUSP00000067325) /// 0090263 /// 0035116 // embryonic hindlimb morphogenesis (GO_REF:0000019 [IEA] Ensembl:ENSMUSP00000067325) /// 0060535 // trachea cartilage morphogenesis (GO_REF:0000019 [IEA] Ensembl:ENSMUSP00000067325) /// 00…	0005576 // extracellular region (GO_REF:0000039 [IEA] UniProtKB-SubCell:SL-0243) /// 0005576 // extracellular region (GO_REF:0000019 [IEA] Ensembl:ENSMUSP00000067325) /// 0009986 // cell surface (GO_REF:0000019 [IEA] Ensembl:ENSMUSP00000067325)	0008201 // heparin binding (GO_REF:0000019 [IEA] Ensembl:ENSMUSP00000067325)	R-spondin-2	E5RGU9_HUMAN|RSPO2	protein	taxon:9606	20130119	ENSEMBL			0.0642613	0.467294	1	1	3149	124	148	2	2	1	0	0	0	0
TMEM81	0.59666	0.59666	0.59666	2.96372	7.56234	7.56234	7.56234	4.42269	7.56234e-06	4.42269	2.18477	0.0289057	0.641348	1	7.56234e-06	4.42269	2.18477	0.0289057	0.641347	1	UniProtKB	Q6P7N7	TMEM81			0016021 // integral to membrane (GO_REF:0000037 [IEA] UniProtKB-KW:KW-0812)		Transmembrane protein 81	TMM81_HUMAN|UNQ2788/PRO7178|TMEM81	protein	taxon:9606	20130119	UniProtKB			0.303842	2.20947	1	1	1332	4	4	4	4	1	0	0	0	0
TOX3	0.117428	0.117428	0.117428	2.96372	1.48833	1.48833	1.48833	4.42269	1.48833e-06	4.42269	0.969229	0.332431	1	1	1.48833e-06	4.42269	0.96923	0.332431	1	1	UniProtKB	O15405	TOX3		0043524 // negative regulation of neuron apoptosis (PMID:21172805 [IDA]) /// 0006351 // transcription, DNA-dependent (GO_REF:0000037 [IEA] UniProtKB-KW:KW-0804) /// 0006915 // apoptosis (GO_REF:0000037 [IEA] UniProtKB-KW:KW-0053) /// 0045893 // positive regulation of transcription, DNA-dependent (PMID:21172805 [IDA])	0005634 // nucleus (GO_REF:0000039 [IEA] UniProtKB-SubCell:SL-0191)	0051219 // phosphoprotein binding (PMID:21172805 [IPI] UniProtKB:P16220) /// 0034056 // estrogen response element binding (PMID:21172805 [IDA]) /// 0003682 // chromatin binding (PMID:21172805 [IDA]) /// 0005515 // protein binding (PMID:21172805 [IPI] UniProtKB:Q99966) /// 0042803 // protein homodimerization activity (PMID:21172805 [IDA])	TOX high mobility group box family member 3	TOX3_HUMAN|TOX3|CAGF9|TNRC9	protein	taxon:9606	20110309	UniProtKB			0.0597987	0.434843	2	0	3384	88	93	2	2	1	0	0	0	0
ARHGAP22	0.118975	0.118975	0.118975	2.96372	1.50794	1.50794	1.50794	4.42269	1.50794e-06	4.42269	0.975593	0.329266	1	1	1.50794e-06	4.42269	0.975593	0.329266	1	1	UniProtKB	Q7Z5H3, A6NHM7, D6RBJ8, B4DED8, A6NJ38	ARHGAP22		0007165 // signal transduction (GO_REF:0000002 [IEA] InterPro:IPR000198|InterPro:IPR008936) /// 0030154 // cell differentiation (GO_REF:0000037 [IEA] UniProtKB-KW:KW-0221) /// 0006355 // regulation of transcription, DNA-dependent (GO_REF:0000037 [IEA] UniProtKB-KW:KW-0805) /// 0051056 // regulation of small GTPase mediated signal transduction (Reactome:REACT_11051 [TAS]) /// 0006351 // transcript…	0005829 // cytosol (Reactome:REACT_9982 [TAS]) /// 0005634 // nucleus (GO_REF:0000039 [IEA] UniProtKB-SubCell:SL-0191) /// 0005622 // intracellular (GO_REF:0000002 [IEA] InterPro:IPR000198|InterPro:IPR008936)	0005515 // protein binding (PMID:21078624 [IPI] UniProtKB:O00555) /// 0005096 // GTPase activator activity (GO_REF:0000037 [IEA] UniProtKB-KW:KW-0343) /// 0005096 // GTPase activator activity (GO_REF:0000038 [IEA] UniProtKB-KW:KW-0343) /// 0005543 // phospholipid binding (GO_REF:0000002 [IEA] InterPro:IPR001849)	Rho GTPase-activating protein 22	A6NHM7_HUMAN|hCG_2042896|ARHGAP22	protein	taxon:9606	20130119	UniProtKB			0.0605865	0.440572	4	0	3340	135	143	2	2	1	0	0	0	0
C12orf77	0.262121	0.262121	0.262121	2.96372	3.32224	3.32224	3.32224	4.42269	3.32224e-06	4.42269	1.44808	0.147595	1	1	3.32224e-06	4.42269	1.44808	0.147595	1	1																0.133482	0.970653	1	1	1516	2	2	2	2	1	1	1	0	0
GPANK1 (NT_113891 3138624..3143680)	0.113633	0.113633	0.113633	2.96372	1.44024	1.44024	1.44024	4.42269	1.44024e-06	4.42269	0.953441	0.340367	1	1	1.44024e-06	4.42269	0.953441	0.340367	1	1																0.0578664	0.420792	5	0	3497	0	2	0	2	0	0	0	0	0
LEP	0.115954	0.115954	0.115954	2.96372	1.46966	1.46966	1.46966	4.42269	1.46966e-06	4.42269	0.96313	0.335483	1	1	1.46966e-06	4.42269	0.96313	0.335483	1	1	UniProtKB	P41159	LEP		0001819 // positive regulation of cytokine production (GO_REF:0000019 [IEA] Ensembl:ENSRNOP00000008020) /// 0045639 // positive regulation of myeloid cell differentiation (GO_REF:0000019 [IEA] Ensembl:ENSMUSP00000067046) /// 0006112 // energy reserve metabolic process (GO_REF:0000019 [IEA] Ensembl:ENSRNOP00000008020) /// 0007565 // female pregnancy (GO_REF:0000019 [IEA] Ensembl:ENSRNOP00000008020…	0005622 // intracellular (GO_REF:0000019 [IEA] Ensembl:ENSRNOP00000008020) /// 0005576 // extracellular region (Reactome:REACT_27275 [TAS]) /// 0005615 // extracellular space (GO_REF:0000024 [ISS] UniProtKB:P41160)	0051428 // peptide hormone receptor binding (GO_REF:0000019 [IEA] Ensembl:ENSRNOP00000008020) /// 0008083 // growth factor activity (GO_REF:0000019 [IEA] Ensembl:ENSMUSP00000067046) /// 0005179 // hormone activity (GO_REF:0000019 [IEA] Ensembl:ENSRNOP00000008020)	Leptin	LEP_HUMAN|LEP|OB|OBS	protein	taxon:9606	20130119	ENSEMBL			0.0590484	0.429387	1	1	3427	8	8	2	2	1	0	0	0	0
LMO3	0.154141	0.154141	0.154141	2.96372	1.95365	1.95365	1.95365	4.42269	1.95365e-06	4.42269	1.11045	0.266804	1	1	1.95365e-06	4.42269	1.11045	0.266804	1	1	UniProtKB	Q05D86, F6TDU8, F5H3S4, C9JE61, F5GZR3, F5H4K9, F5H2N9, Q8TAP4, F5H4T0, B4DG90, F5H655, F5GYZ6	LMO3		0006355 // regulation of transcription, DNA-dependent (GO_REF:0000037 [IEA] UniProtKB-KW:KW-0805) /// 0006351 // transcription, DNA-dependent (GO_REF:0000037 [IEA] UniProtKB-KW:KW-0804)		0008270 // zinc ion binding (GO_REF:0000002 [IEA] InterPro:IPR001781) /// 0046872 // metal ion binding (GO_REF:0000037 [IEA] UniProtKB-KW:KW-0479) /// 0046872 // metal ion binding (GO_REF:0000038 [IEA] UniProtKB-KW:KW-0479)	cDNA FLJ55199, highly similar to LIM-only protein 3	B4DG90_HUMAN|LMO3	protein	taxon:9606	20130119	InterPro			0.0784945	0.570795	7	1	5156	68	68	4	4	1	0	0	0	0
LOC285556	0.0390158	0.0390158	0.0390158	2.96372	0.494503	0.494503	0.494503	4.42269	4.94503e-07	4.42269	0.558677	0.576382	1	1	4.94503e-07	4.42269	0.558677	0.576382	1	1																0.0198683	0.144478	1	1	10185	6	6	2	2	1	0	0	0	0
PNMA2	0.0820008	0.0820008	0.0820008	2.96372	1.03931	1.03931	1.03931	4.42269	1.03931e-06	4.42269	0.809935	0.417978	1	1	1.03931e-06	4.42269	0.809935	0.417978	1	1	UniProtKB	Q9UL42	PNMA2		0006915 // apoptosis (PMID:16214224 [NAS])	0005730 // nucleolus (GO_REF:0000039 [IEA] UniProtKB-SubCell:SL-0188)	0005515 // protein binding (PMID:17474147 [IPI] UniProtKB:P16333)	Paraneoplastic antigen Ma2	PNMA2_HUMAN|PNMA2|KIAA0883|MA2	protein	taxon:9606	20130121	IntAct			0.0417579	0.303655	1	1	4846	9	9	2	2	1	0	0	0	0
RGS9BP	0.13731	0.13731	0.13731	2.96372	1.74033	1.74033	1.74033	4.42269	1.74033e-06	4.42269	1.04808	0.294604	1	1	1.74033e-06	4.42269	1.04808	0.294604	1	1	UniProtKB	Q6ZS82	RGS9BP		0050908 // detection of light stimulus involved in visual perception (GO_REF:0000019 [IEA] Ensembl:ENSMUSP00000065511) /// 0009968 // negative regulation of signal transduction (GO_REF:0000037 [IEA] UniProtKB-KW:KW-0734)	0016021 // integral to membrane (GO_REF:0000037 [IEA] UniProtKB-KW:KW-0812)		Regulator of G-protein signaling 9-binding protein	R9BP_HUMAN|R9AP|RGS9BP	protein	taxon:9606	20130119	UniProtKB			0.0699236	0.508469	1	1	2894	2	2	2	2	1	0	0	0	0
STEAP2	0.0556939	0.0556939	0.0556939	2.96372	0.705889	0.705889	0.705889	4.42269	7.05889e-07	4.42269	0.66749	0.504459	1	1	7.05889e-07	4.42269	0.66749	0.504459	1	1	UniProtKB	B5MC02, G5E9C6, Q8NFT2, C9JLP2, C9JHX5	STEAP2		0006811 // ion transport (GO_REF:0000037 [IEA] UniProtKB-KW:KW-0406) /// 0009725 // response to hormone stimulus (PMID:12095985 [IDA]) /// 0022900 // electron transport chain (GO_REF:0000037 [IEA] UniProtKB-KW:KW-0249) /// 0006893 // Golgi to plasma membrane transport (PMID:12095985 [IDA]) /// 0055072 // iron ion homeostasis (GO_REF:0000037 [IEA] UniProtKB-KW:KW-0410) /// 0045055 // regulated sec…	0030173 // integral to Golgi membrane (PMID:12095985 [IDA]) /// 0010008 // endosome membrane (GO_REF:0000039 [IEA] UniProtKB-SubCell:SL-0100) /// 0005769 // early endosome (PMID:12095985 [IDA]) /// 0030140 // trans-Golgi network transport vesicle (PMID:12095985 [IDA]) /// 0016021 // integral to membrane (GO_REF:0000038 [IEA] UniProtKB-KW:KW-0812) /// 0005886 // plasma membrane (PMID:12095985 [IDA…	0046872 // metal ion binding (GO_REF:0000037 [IEA] UniProtKB-KW:KW-0479) /// 0016491 // oxidoreductase activity (GO_REF:0000002 [IEA] InterPro:IPR004455) /// 0016491 // oxidoreductase activity (GO_REF:0000037 [IEA] UniProtKB-KW:KW-0560) /// 0005215 // transporter activity (PMID:12095985 [IDA]) /// 0000166 // nucleotide binding (GO_REF:0000002 [IEA] InterPro:IPR016040)	Metalloreductase STEAP2	B5MC02_HUMAN|STEAP2	protein	taxon:9606	20130119	InterPro			0.0283614	0.206238	6	0	7135	10	10	2	2	1	0	0	0	0
THAP11	0.210698	0.210698	0.210698	2.96372	2.67048	2.67048	2.67048	4.42269	2.67048e-06	4.42269	1.29829	0.194188	1	1	2.67048e-06	4.42269	1.29829	0.194188	1	1	UniProtKB	Q96EK4	THAP11		0006355 // regulation of transcription, DNA-dependent (GO_REF:0000037 [IEA] UniProtKB-KW:KW-0805) /// 0006351 // transcription, DNA-dependent (GO_REF:0000037 [IEA] UniProtKB-KW:KW-0804)	0005825 // half bridge of spindle pole body (PMID:18029348 [IDA]) /// 0005634 // nucleus (PMID:18029348 [IDA]) /// 0005737 // cytoplasm (PMID:18029348 [IDA]) /// 0005730 // nucleolus (PMID:18029348 [IDA])	0005515 // protein binding (PMID:18585351 [IPI] UniProtKB:P70677) /// 0046872 // metal ion binding (GO_REF:0000037 [IEA] UniProtKB-KW:KW-0479) /// 0003677 // DNA binding (GO_REF:0000037 [IEA] UniProtKB-KW:KW-0238) /// 0005515 // protein binding (PMID:18585351 [IPI] UniProtKB:P51610) /// 0005515 // protein binding (PMID:21988832 [IPI] UniProtKB:Q13363)	THAP domain-containing protein 11	THA11_HUMAN|THAP11|HRIHFB2206	protein	taxon:9606	20130119	UniProtKB			0.107295	0.780228	1	1	1886	1	2	1	2	0.5	0	0	0	0
WNK3 (NT_011630 1773341..1938524)	0.0350327	0.0350327	0.0350327	2.96372	0.44402	0.44402	0.44402	4.42269	4.4402e-07	4.42269	0.529392	0.596533	1	1	4.4402e-07	4.42269	0.529392	0.596533	1	1																0.01784	0.129728	2	0	11343	1	87	1	2	0.5	1	1	0	0
COL9A1	0.0990962	0.0990962	0.0990962	2.96372	1.25599	1.25599	1.25599	4.42269	1.25599e-06	4.42269	0.890368	0.373268	1	1	1.25599e-06	4.42269	0.890368	0.373268	1	1	UniProtKB	P20849	COL9A1		0002062 // chondrocyte differentiation (GO_REF:0000019 [IEA] Ensembl:ENSRNOP00000018116) /// 0009887 // organ morphogenesis (PMID:3473493 [TAS]) /// 0003417 /// 0030198 // extracellular matrix organization (Reactome:REACT_118779 [TAS]) /// 0007411 // axon guidance (Reactome:REACT_18266 [TAS]) /// 0001894 // tissue homeostasis (GO_REF:0000019 [IEA] Ensembl:ENSMUSP00000051579)	0005576 // extracellular region (Reactome:REACT_121366 [TAS]) /// 0005788 // endoplasmic reticulum lumen (Reactome:REACT_121254 [TAS]) /// 0005788 // endoplasmic reticulum lumen (Reactome:REACT_121366 [TAS]) /// 0005788 // endoplasmic reticulum lumen (Reactome:REACT_120939 [TAS]) /// 0005576 // extracellular region (Reactome:REACT_16880 [TAS]) /// 0005576 // extracellular region (Reactome:REACT_1…	0046872 // metal ion binding (GO_REF:0000037 [IEA] UniProtKB-KW:KW-0479) /// 0030020 // extracellular matrix structural constituent conferring tensile strength (PMID:8660302 [IC] GO:0005594)	Collagen alpha-1(IX) chain	CO9A1_HUMAN|COL9A1	protein	taxon:9606	20130119	ENSEMBL			0.0504635	0.36696	2	0	4010	59	63	2	2	1	0	0	1	1
POMZP3	1.12458	1.12458	1.12458	2.91667	14.3038	14.3038	14.3038	4.35249	1.43038e-05	4.35249	2.99319	0.00276082	0.131001	1	1.43038e-05	4.35249	2.99319	0.00276081	0.131	1	UniProtKB	Q6PJE2	POMZP3		0008150 // biological_process (GO_REF:0000015 [ND])	0005575 // cellular_component (GO_REF:0000015 [ND])	0003674 // molecular_function (GO_REF:0000015 [ND])	POM121 and ZP3 fusion protein	POZP3_HUMAN|POMZP3	protein	taxon:9606	20061026	UniProtKB			0.586736	4.26662	2	0	1552	6	58	2	9	0.222222	2	5	0	3
STC2	7.62409	7.62409	7.62409	2.89017	97.1719	97.1719	97.1719	4.31294	9.71719e-05	4.31294	7.78442	7.10543e-15	3.26342e-12	2.96971e-10	9.71719e-05	4.31294	7.78454	7.10543e-15	3.26342e-12	2.96971e-10	UniProtKB	E5RG57, O76061, H0YB13	STC2		0043434 // response to peptide hormone stimulus (GO_REF:0000019 [IEA] Ensembl:ENSRNOP00000028146) /// 0007584 // response to nutrient (PMID:9753616 [TAS]) /// 0046697 // decidualization (GO_REF:0000019 [IEA] Ensembl:ENSRNOP00000028146) /// 0007267 // cell-cell signaling (PMID:9753616 [TAS]) /// 0007166 // cell surface receptor linked signal transduction (PMID:9753616 [TAS]) /// 0033280 // respons…	0005576 // extracellular region (GO_REF:0000039 [IEA] UniProtKB-SubCell:SL-0243) /// 0005576 // extracellular region (GO_REF:0000002 [IEA] InterPro:IPR004978)	0005179 // hormone activity (GO_REF:0000037 [IEA] UniProtKB-KW:KW-0372) /// 0005179 // hormone activity (GO_REF:0000002 [IEA] InterPro:IPR004978)	Stanniocalcin-2	E5RG57_HUMAN|STC2	protein	taxon:9606	20130119	InterPro			4.03354	29.3311	1	1	5343	308	310	211	213	0.99061	11	11	3	3
FASTKD5	1.13489	1.13489	1.13489	2.889	14.4659	14.4659	14.4659	4.31119	1.44659e-05	4.31119	3.00311	0.00267236	0.128234	1	1.44659e-05	4.31119	3.00312	0.00267235	0.128233	1	UniProtKB	Q7L8L6	FASTKD5		0045333 // cellular respiration (PMID:20869947 [ISS] UniProtKB:Q14CZ7)	0005739 // mitochondrion (PMID:20869947 [IDA])	0004672 // protein kinase activity (GO_REF:0000002 [IEA] InterPro:IPR010622)	FAST kinase domain-containing protein 5	FAKD5_HUMAN|FASTKD5|KIAA1792	protein	taxon:9606	20130119	InterPro			0.600786	4.36879	1	1	2863	0	21	0	17	0	0	0	0	0
PLXNA3 (NW_003871103 1931403..1946763)	0.281827	0.281827	0.281827	2.87904	3.59515	3.59515	3.59515	4.29632	3.59515e-06	4.29632	1.49585	0.134694	1	1	3.59515e-06	4.29632	1.49585	0.134694	1	1																0.149984	1.09065	1	1	6746	0	17	0	10	0	0	2	0	2
KCNC3	0.174189	0.174189	0.174189	2.82259	2.23234	2.23234	2.23234	4.21208	2.23234e-06	4.21208	1.17292	0.240828	1	1	2.23234e-06	4.21208	1.17292	0.240828	1	1	UniProtKB	E9PQY4, E7ETH1, Q14003	KCNC3		0046928 // regulation of neurotransmitter secretion (GO_REF:0000019 [IEA] Ensembl:ENSMUSP00000103539) /// 0006813 // potassium ion transport (PMID:1740329 [TAS]) /// 0051260 // protein homooligomerization (GO_REF:0000002 [IEA] InterPro:IPR003131) /// 0007268 // synaptic transmission (Reactome:REACT_13685 [TAS]) /// 0008219 // cell death (GO_REF:0000037 [IEA] UniProtKB-KW:KW-0523)	0008076 // voltage-gated potassium channel complex (GO_REF:0000002 [IEA] InterPro:IPR003091|InterPro:IPR003968|InterPro:IPR003974) /// 0005886 // plasma membrane (Reactome:REACT_75857 [TAS]) /// 0031594 // neuromuscular junction (GO_REF:0000019 [IEA] Ensembl:ENSMUSP00000103539) /// 0032590 // dendrite membrane (GO_REF:0000019 [IEA] Ensembl:ENSMUSP00000103539) /// 0032809 // cell soma membrane (GO…	0005249 // voltage-gated potassium channel activity (GO_REF:0000002 [IEA] InterPro:IPR003091) /// 0005251 // delayed rectifier potassium channel activity (GO_REF:0000033 [IBA] PANTHER:PTN000164969) /// 0005249 // voltage-gated potassium channel activity (GO_REF:0000002 [IEA] InterPro:IPR003091|InterPro:IPR003968|InterPro:IPR003974|InterPro:IPR005404) /// 0005249 // voltage-gated potassium channel…	Potassium voltage-gated channel subfamily C member 3	E7ETH1_HUMAN|KCNC3	protein	taxon:9606	20130119	InterPro			0.0955725	0.694983	1	1	3176	7	8	3	3	1	0	0	0	0
XKR6	0.147095	0.147095	0.147095	2.82259	1.88511	1.88511	1.88511	4.21208	1.88511e-06	4.21208	1.07785	0.281102	1	1	1.88511e-06	4.21208	1.07785	0.281102	1	1	UniProtKB	Q5GH73	XKR6			0016021 // integral to membrane (GO_REF:0000037 [IEA] UniProtKB-KW:KW-0812)		XK-related protein 6	XKR6_HUMAN|C8orf21|XKR6|C8orf5|C8orf7|XRG6	protein	taxon:9606	20130119	UniProtKB			0.0807068	0.586882	1	1	3761	199	221	3	3	1	0	0	0	0
ABCA9	0.0877996	0.0877996	0.0877996	2.82259	1.12521	1.12521	1.12521	4.21208	1.12521e-06	4.21208	0.832729	0.404998	1	1	1.12521e-06	4.21208	0.832729	0.404998	1	1	UniProtKB	Q8IUA7, H0Y4U7	ABCA9		0006810 // transport (GO_REF:0000037 [IEA] UniProtKB-KW:KW-0813)	0005739 // mitochondrion (GO_REF:0000019 [IEA] Ensembl:ENSMUSP00000036338) /// 0016021 // integral to membrane (GO_REF:0000037 [IEA] UniProtKB-KW:KW-0812)	0005524 // ATP binding (GO_REF:0000037 [IEA] UniProtKB-KW:KW-0067) /// 0005524 // ATP binding (GO_REF:0000038 [IEA] UniProtKB-KW:KW-0067) /// 0016887 // ATPase activity (GO_REF:0000002 [IEA] InterPro:IPR003439)	ATP-binding cassette sub-family A member 9	H0Y4U7_HUMAN|ABCA9	protein	taxon:9606	20130119	UniProtKB			0.048173	0.350304	1	1	6301	60	67	3	3	1	0	0	2	2
C15orf48	0.580509	0.580509	0.580509	2.82259	7.43958	7.43958	7.43958	4.21208	7.43958e-06	4.21208	2.14123	0.0322556	0.688168	1	7.43958e-06	4.21208	2.14123	0.0322555	0.688167	1																0.318508	2.31612	2	0	953	22	23	3	3	1	0	0	3	3
PCDHB6	0.182583	0.182583	0.182583	2.82259	2.33991	2.33991	2.33991	4.21208	2.33991e-06	4.21208	1.20085	0.229811	1	1	2.33991e-06	4.21208	1.20085	0.229811	1	1	UniProtKB	F5H446, Q9Y5E3	PCDHB6		0007416 // synaptogenesis (PMID:12231349 [TAS]) /// 0007268 // synaptic transmission (PMID:12231349 [TAS]) /// 0007399 // nervous system development (PMID:10380929 [TAS]) /// 0007155 // cell adhesion (PMID:10380929 [TAS]) /// 0016339 // calcium-dependent cell-cell adhesion (PMID:11322959 [NAS]) /// 0007156 // homophilic cell adhesion (GO_REF:0000002 [IEA] InterPro:IPR002126)	0005886 // plasma membrane (GO_REF:0000002 [IEA] InterPro:IPR020894) /// 0016021 // integral to membrane (PMID:11322959 [NAS]) /// 0016021 // integral to membrane (GO_REF:0000038 [IEA] UniProtKB-KW:KW-0812) /// 0005887 // integral to plasma membrane (PMID:10380929 [TAS])	0005509 // calcium ion binding (GO_REF:0000002 [IEA] InterPro:IPR002126|InterPro:IPR015919)	Protocadherin beta-6	F5H446_HUMAN|PCDHB6	protein	taxon:9606	20130119	InterPro			0.100178	0.72847	1	1	3030	0	3	0	3	0	0	0	0	0
LOC100996253	0.518001	0.518001	0.518001	2.82259	6.6385	6.6385	6.6385	4.21208	6.6385e-06	4.21208	2.02266	0.0431078	0.822689	1	6.6385e-06	4.21208	2.02267	0.0431077	0.822688	1																0.284212	2.06673	1	1	1068	2	38	1	3	0.333333	1	2	0	0
LOC100996619	0.250668	0.250668	0.250668	2.82259	3.21247	3.21247	3.21247	4.21208	3.21247e-06	4.21208	1.40704	0.159414	1	1	3.21247e-06	4.21208	1.40704	0.159414	1	1																0.137534	1.00012	1	1	2207	160	195	3	3	1	0	0	0	0
PVRL4	0.157974	0.157974	0.157974	2.82259	2.02453	2.02453	2.02453	4.21208	2.02453e-06	4.21208	1.11699	0.263997	1	1	2.02453e-06	4.21208	1.11699	0.263997	1	1	UniProtKB	Q96NY8	PVRL4		0045216 // cell-cell junction organization (Reactome:REACT_19331 [TAS]) /// 0034332 // adherens junction organization (Reactome:REACT_19195 [TAS]) /// 0034329 // cell junction assembly (Reactome:REACT_20676 [TAS]) /// 0007155 // cell adhesion (GO_REF:0000037 [IEA] UniProtKB-KW:KW-0130) /// 0019048 // virus-host interaction (GO_REF:0000037 [IEA] UniProtKB-KW:KW-0945)	0005912 // adherens junction (GO_REF:0000039 [IEA] UniProtKB-SubCell:SL-0009) /// 0005886 // plasma membrane (Reactome:REACT_19364 [TAS]) /// 0005886 // plasma membrane (Reactome:REACT_19214 [TAS]) /// 0005886 // plasma membrane (Reactome:REACT_19201 [TAS]) /// 0016021 // integral to membrane (GO_REF:0000037 [IEA] UniProtKB-KW:KW-0812) /// 0005886 // plasma membrane (Reactome:REACT_19169 [TAS]) /…	0005515 // protein binding (PMID:22048310 [IPI] UniProtKB:Q786F2) /// 0005515 // protein binding (PMID:21982860 [IPI] UniProtKB:Q15223) /// 0005515 // protein binding (PMID:21982860 [IPI] UniProtKB:Q495A1)	Poliovirus receptor-related protein 4	PVRL4_HUMAN|PVRL4|LNIR|PRR4	protein	taxon:9606	20130121	IntAct			0.0866757	0.630287	1	1	3502	5	5	3	3	1	0	0	0	0
CLCN5 (NW_004070880 2142043..2318664)	0.275129	0.275129	0.275129	2.75202	3.5477	3.5477	3.5477	4.10678	3.5477e-06	4.10678	1.46912	0.141801	1	1	3.5477e-06	4.10678	1.46912	0.141801	1	1																0.157035	1.14192	3	1	10309	2	56	0	16	0	0	3	0	1
TLCD2	0.240324	0.240324	0.240324	2.75202	3.0989	3.0989	3.0989	4.10678	3.0989e-06	4.10678	1.37305	0.169737	1	1	3.0989e-06	4.10678	1.37305	0.169737	1	1	UniProtKB	A6NGC4	TLCD2			0016021 // integral to membrane (GO_REF:0000037 [IEA] UniProtKB-KW:KW-0812)		TLC domain-containing protein 2	TLCD2_HUMAN|TLCD2	protein	taxon:9606	20130119	UniProtKB			0.137169	0.997465	1	1	5901	8	8	8	8	1	0	0	0	0
GIPR	0.350333	0.350333	0.350333	2.75202	4.51745	4.51745	4.51745	4.10678	4.51745e-06	4.10678	1.65779	0.0973602	1	1	4.51745e-06	4.10678	1.65779	0.0973601	1	1	UniProtKB	B7WP14, P48546, K7EPD9	GIPR		0007190 // activation of adenylate cyclase activity (PMID:7589426 [TAS]) /// 0007166 // cell surface receptor linked signal transduction (PMID:7556958 [TAS]) /// 0007584 // response to nutrient (PMID:7556958 [TAS]) /// 0006091 // generation of precursor metabolites and energy (PMID:7556958 [TAS])	0005886 // plasma membrane (Reactome:REACT_18392 [TAS]) /// 0005886 // plasma membrane (GO_REF:0000038 [IEA] UniProtKB-KW:KW-1003) /// 0005886 // plasma membrane (Reactome:REACT_17008 [TAS]) /// 0005886 // plasma membrane (Reactome:REACT_22268 [TAS]) /// 0016021 // integral to membrane (GO_REF:0000037 [IEA] UniProtKB-KW:KW-0812) /// 0016021 // integral to membrane (GO_REF:0000038 [IEA] UniProtKB-…	0004888 // transmembrane receptor activity (PMID:7556958 [TAS]) /// 0016519 // gastric inhibitory peptide receptor activity (GO_REF:0000002 [IEA] InterPro:IPR001749)	Gastric inhibitory polypeptide receptor	B7WP14_HUMAN|GIPR	protein	taxon:9606	20130119	UniProtKB			0.199959	1.45406	1	0	2024	17	18	4	4	1	0	0	4	4
FRMD4A	0.150026	0.150026	0.150026	2.68146	1.9474	1.9474	1.9474	4.00148	1.9474e-06	4.00148	1.08105	0.279674	1	1	1.9474e-06	4.00148	1.08105	0.279674	1	1	UniProtKB	Q9P2Q2, F8WAN4	FRMD4A		90162	0005737 // cytoplasm (GO_REF:0000037 [IEA] UniProtKB-KW:KW-0963) /// 0005856 // cytoskeleton (GO_REF:0000002 [IEA] InterPro:IPR000299) /// 0005923 // tight junction (GO_REF:0000019 [IEA] Ensembl:ENSMUSP00000075172) /// 0005856 // cytoskeleton (GO_REF:0000039 [IEA] UniProtKB-SubCell:SL-0090)	0030674 // protein binding, bridging (GO_REF:0000019 [IEA] Ensembl:ENSMUSP00000075172)	FERM domain-containing protein 4A	F8WAN4_HUMAN|FRMD4A	protein	taxon:9606	20130119	InterPro			0.0892235	0.648814	1	1	6804	665	769	6	6	1	0	0	1	1
DPP6 (NT_007741 29570..315361)	0.302008	0.302008	0.302008	2.6613	3.92801	3.92801	3.92801	3.97139	3.92801e-06	3.97139	1.53224	0.125462	1	1	3.92801e-06	3.97139	1.53224	0.125462	1	1																0.181791	1.32194	3	0	3896	163	171	7	7	1	0	0	0	0
FAM58A (NW_003871103 1061049..1072302)	1.15285	1.15285	1.15285	2.63442	15.0351	15.0351	15.0351	3.93128	1.50351e-05	3.93128	2.98954	0.00279396	0.13165	1	1.50351e-05	3.93128	2.98955	0.00279395	0.131649	1																0.705356	5.1292	2	2	1291	0	25	0	9	0	0	4	0	1
HEY1	1.8323	1.8323	1.8323	2.60547	23.9687	23.9687	23.9687	3.88808	2.39687e-05	3.88808	3.76324	0.000167726	0.014365	1	2.39687e-05	3.88808	3.76325	0.000167724	0.0143648	1	UniProtKB	B4DEI9, E5RHK6, Q9Y5J3	HEY1		0003184 /// 0007219 // Notch signaling pathway (Reactome:REACT_299 [TAS]) /// 2001212 /// 0000122 // negative regulation of transcription from RNA polymerase II promoter (PMID:16043483 [IDA]) /// 0060317 // cardiac epithelial to mesenchymal transition (GO_REF:0000024 [ISS] UniProtKB:Q9WV93) /// 0060842 // arterial endothelial cell differentiation (GO_REF:0000024 [ISS] UniProtKB:Q9WV93) /// 000012…	0005634 // nucleus (GO_REF:0000024 [ISS] UniProtKB:Q9WV93) /// 0005737 // cytoplasm (GO_REF:0000024 [ISS] UniProtKB:Q9WV93) /// 0005634 // nucleus (GO_REF:0000038 [IEA] UniProtKB-KW:KW-0539)	0000983 /// 0008134 // transcription factor binding (PMID:17611704 [NAS]) /// 0005515 // protein binding (PMID:15485867 [IPI] UniProtKB:P43694) /// 0005515 // protein binding (PMID:21454491 [IPI] UniProtKB:Q9NQ87) /// 0046983 // protein dimerization activity (GO_REF:0000002 [IEA] InterPro:IPR011598) /// 0003677 // DNA binding (GO_REF:0000002 [IEA] InterPro:IPR003650) /// 0035939 /// 0003700 // tr…	cDNA FLJ52964, highly similar to Hairy/enhancer-of-split related with YRPW motif 1	B4DEI9_HUMAN|HEY1	protein	taxon:9606	20130119	InterPro			1.14129	8.29919	2	1	2305	30	30	26	26	1	3	3	1	1
AQP1	0.0491329	0.0491329	0.0491329	2.54033	0.647352	0.647352	0.647352	3.79087	6.47352e-07	3.79087	0.614091	0.539155	1	1	6.47352e-07	3.79087	0.614091	0.539155	1	1	UniProtKB	E7EM69, E9PC21, P29972, F5GY19, B4E220	AQP1		0046878 // positive regulation of saliva secretion (PMID:15727941 [IMP]) /// 0042538 // hyperosmotic salinity response (GO_REF:0000019 [IEA] Ensembl:ENSRNOP00000015692) /// 0019725 // cellular homeostasis (PMID:19268465 [IDA]) /// 0021670 // lateral ventricle development (PMID:16133142 [IEP]) /// 0015701 // bicarbonate transport (Reactome:REACT_121329 [TAS]) /// 0015701 // bicarbonate transport (…	0031526 // brush border membrane (PMID:9013443 [IDA]) /// 0005887 // integral to plasma membrane (PMID:1722319 [TAS]) /// 0005886 // plasma membrane (PMID:17012249 [IDA]) /// 0016021 // integral to membrane (GO_REF:0000038 [IEA] UniProtKB-KW:KW-0812) /// 0016323 // basolateral plasma membrane (PMID:9013443 [IDA]) /// 0005737 // cytoplasm (PMID:17645239 [IDA]) /// 0005886 // plasma membrane (React…	0005515 // protein binding (PMID:19447967 [IPI] UniProtKB:Q99750) /// 0015168 // glycerol transmembrane transporter activity (PMID:7491270 [IDA]) /// 0005372 // water transporter activity (PMID:12766090 [IDA]) /// 0015079 // potassium ion transmembrane transporter activity (GO_REF:0000019 [IEA] Ensembl:ENSMUSP00000004774) /// 0005223 // intracellular cGMP activated cation channel activity (PMID:1…	Aquaporin-1	B4E220_HUMAN|AQP1	protein	taxon:9606	20130119	ENSEMBL			0.0318977	0.231953	4	0	3172	3	3	1	1	1	0	0	0	0
CNN1	0.0982659	0.0982659	0.0982659	2.54033	1.2947	1.2947	1.2947	3.79087	1.2947e-06	3.79087	0.868457	0.385144	1	1	1.2947e-06	3.79087	0.868457	0.385144	1	1	UniProtKB	K7ER02, B7Z7E1, B4DUX6, K7EQ72, P51911, K7ENC5	CNN1		0031032 // actomyosin structure organization (GO_REF:0000002 [IEA] InterPro:IPR001997) /// 0006940 // regulation of smooth muscle contraction (PMID:14550641 [TAS])	0005856 // cytoskeleton (PMID:8616889 [IDA])	0003779 // actin binding (GO_REF:0000002 [IEA] InterPro:IPR001997) /// 0005516 // calmodulin binding (GO_REF:0000037 [IEA] UniProtKB-KW:KW-0112) /// 0003779 // actin binding (GO_REF:0000037 [IEA] UniProtKB-KW:KW-0009)	Calponin-1	B4DUX6_HUMAN|CNN1	protein	taxon:9606	20130119	InterPro			0.0637953	0.463906	1	1	1586	13	14	1	1	1	0	0	0	0
CNOT3 (NW_003571056 112548..130559)	0.16195	0.16195	0.16195	2.54033	2.13377	2.13377	2.13377	3.79087	2.13377e-06	3.79087	1.1149	0.264892	1	1	2.13377e-06	3.79087	1.1149	0.264892	1	1																0.10514	0.764553	1	1	2887	2	8	2	3	0.666667	2	2	0	0
GATA3	0.0507654	0.0507654	0.0507654	2.54033	0.66886	0.66886	0.66886	3.79087	6.6886e-07	3.79087	0.62421	0.53249	1	1	6.6886e-07	3.79087	0.62421	0.53249	1	1	UniProtKB	P23771	GATA3		2000664 /// 0060065 // uterus development (GO_REF:0000024 [ISS] UniProtKB:P23772) /// 0072676 /// 0001701 // in utero embryonic development (GO_REF:0000019 [IEA] Ensembl:ENSMUSP00000100041) /// 0030218 // erythrocyte differentiation (GO_REF:0000019 [IEA] Ensembl:ENSMUSP00000100041) /// 0043523 // regulation of neuron apoptosis (GO_REF:0000019 [IEA] Ensembl:ENSMUSP00000100041) /// 0043627 // respo…	0005634 // nucleus (PMID:20189993 [IDA]) /// 0005634 // nucleus (PMID:18029348 [IDA]) /// 0005634 // nucleus (PMID:11256614 [IDA]) /// 0005730 // nucleolus (PMID:18029348 [IDA]) /// 0005654 // nucleoplasm (Reactome:REACT_25215 [TAS]) /// 0005634 // nucleus (PMID:19723756 [IDA]) /// 0000790 // nuclear chromatin (PMID:20855495 [IDA]) /// 0005634 // nucleus (PMID:19674970 [IDA])	0001078 /// 0044212 /// 0003700 // transcription factor activity (PMID:8088776 [TAS]) /// 0000987 /// 0005515 // protein binding (PMID:19723756 [IPI] UniProtKB:Q8WW38) /// 0001158 /// 0070888 // E-box binding (PMID:20855495 [IDA]) /// 0046872 // metal ion binding (GO_REF:0000037 [IEA] UniProtKB-KW:KW-0479) /// 0003677 // DNA binding (PMID:1871134 [TAS]) /// 0001071 /// 0008134 // transcription fa…	Trans-acting T-cell-specific transcription factor GATA-3	GATA3_HUMAN|GATA3	protein	taxon:9606	20110510	UniProtKB			0.0329575	0.23966	2	0	3070	39	41	1	1	1	0	0	0	0
LY6G5B (NT_007592 31578727..31580227)	0.402712	0.402712	0.402712	2.54033	5.30594	5.30594	5.30594	3.79087	5.30594e-06	3.79087	1.75811	0.0787295	1	1	5.30594e-06	3.79087	1.75811	0.0787295	1	1																0.261445	1.90118	1	1	774	0	2	0	2	0	0	0	0	0
LY6G5B (NT_167247 3018407..3019907)	0.402712	0.402712	0.402712	2.54033	5.30594	5.30594	5.30594	3.79087	5.30594e-06	3.79087	1.75811	0.0787295	1	1	5.30594e-06	3.79087	1.75811	0.0787295	1	1																0.261445	1.90118	1	1	774	0	3	0	2	0	0	0	0	0
OTX2	0.12738	0.12738	0.12738	2.54033	1.6783	1.6783	1.6783	3.79087	1.6783e-06	3.79087	0.988776	0.322773	1	1	1.6783e-06	3.79087	0.988776	0.322773	1	1	UniProtKB	F1T0C9, G3V3J3, G3V3P9, P32243	OTX2		0030900 // forebrain development (GO_REF:0000019 [IEA] Ensembl:ENSMUSP00000112532) /// 0030901 // midbrain development (GO_REF:0000019 [IEA] Ensembl:ENSMUSP00000112532) /// 0009953 // dorsal/ventral pattern formation (GO_REF:0000019 [IEA] Ensembl:ENSMUSP00000112532) /// 0090009 // primitive streak formation (GO_REF:0000019 [IEA] Ensembl:ENSMUSP00000112532) /// 0008589 // regulation of smoothened …	0005634 // nucleus (GO_REF:0000039 [IEA] UniProtKB-SubCell:SL-0191) /// 0043234 // protein complex (PMID:20530484 [IDA]) /// 0005737 // cytoplasm (GO_REF:0000019 [IEA] Ensembl:ENSMUSP00000112532) /// 0005634 // nucleus (GO_REF:0000040 [IEA] UniProtKB-SubCell:SL-0191) /// 0030426 // growth cone (PMID:16267555 [IDA])	0003677 // DNA binding (GO_REF:0000038 [IEA] UniProtKB-KW:KW-0371) /// 0003700 // transcription factor activity (GO_REF:0000029 [NAS]) /// 0046982 // protein heterodimerization activity (GO_REF:0000019 [IEA] Ensembl:ENSMUSP00000112532) /// 0003700 // transcription factor activity (GO_REF:0000002 [IEA] InterPro:IPR001356|InterPro:IPR003022|InterPro:IPR003025|InterPro:IPR013851) /// 0043565 // sequ…	Homeobox protein OTX2	F1T0C9_HUMAN|OTX2	protein	taxon:9606	20130119	UniProtKB			0.0826967	0.601353	5	1	2447	5	5	2	2	1	0	0	0	0
RPP21 (NT_113891 1824915..1826645)	0.265502	0.265502	0.265502	2.54033	3.49813	3.49813	3.49813	3.79087	3.49813e-06	3.79087	1.42752	0.153431	1	1	3.49813e-06	3.79087	1.42752	0.153431	1	1																0.172367	1.25342	3	0	587	0	1	0	1	0	0	0	0	1
RPP21 (NT_167245 1606559..1608289)	0.265502	0.265502	0.265502	2.54033	3.49813	3.49813	3.49813	3.79087	3.49813e-06	3.79087	1.42752	0.153431	1	1	3.49813e-06	3.79087	1.42752	0.153431	1	1																0.172367	1.25342	3	0	587	0	1	0	1	0	0	1	0	0
SEBOX (NW_003871090 46131..47107)	0.23436	0.23436	0.23436	2.54033	3.08782	3.08782	3.08782	3.79087	3.08782e-06	3.79087	1.34119	0.17986	1	1	3.08782e-06	3.79087	1.34119	0.17986	1	1																0.152149	1.1064	1	1	665	0	1	0	1	0	0	0	0	0
ASB18	0.111242	0.111242	0.111242	2.54033	1.46567	1.46567	1.46567	3.79087	1.46567e-06	3.79087	0.924019	0.355477	1	1	1.46567e-06	3.79087	0.924019	0.355477	1	1	UniProtKB	Q6ZVZ8	ASB18		0035556 /// 0016567 // protein ubiquitination (GO_REF:0000041 [IEA] UniPathway:UPA00143)	0005622 // intracellular (GO_REF:0000002 [IEA] InterPro:IPR001496)		Ankyrin repeat and SOCS box protein 18	ASB18_HUMAN|ASB18	protein	taxon:9606	20130119	GOC			0.0722194	0.525164	1	1	1401	81	87	1	1	1	0	0	0	0
ATP2B3 (NW_003871103 1009246..1056054)	0.023707	0.023707	0.023707	2.54033	0.312352	0.312352	0.312352	3.79087	3.12352e-07	3.79087	0.426565	0.669697	1	1	3.12352e-07	3.79087	0.426565	0.669697	1	1																0.0153908	0.111919	2	0	6574	0	6	0	1	0	0	0	0	0
BVES	0.0269217	0.0269217	0.0269217	2.54033	0.354707	0.354707	0.354707	3.79087	3.54707e-07	3.79087	0.454567	0.649421	1	1	3.54707e-07	3.79087	0.454567	0.649421	1	1	UniProtKB	Q8NE79	BVES		0032314 // regulation of Rac GTPase activity (GO_REF:0000024 [ISS] UniProtKB:Q9ES83) /// 0001921 // positive regulation of receptor recycling (GO_REF:0000024 [ISS] UniProtKB:Q9ES83) /// 0007517 // muscle organ development (PMID:10441744 [NAS]) /// 0008360 // regulation of cell shape (GO_REF:0000024 [ISS] UniProtKB:Q9ES83) /// 0090136 /// 0034446 // substrate adhesion-dependent cell spreading (GO_…	0005923 // tight junction (PMID:16188940 [IDA]) /// 0005886 // plasma membrane (GO_REF:0000024 [ISS] UniProtKB:Q9ES83) /// 0016021 // integral to membrane (PMID:16188940 [IDA]) /// 0016021 // integral to membrane (PMID:10441744 [NAS]) /// 0016328 // lateral plasma membrane (PMID:16188940 [IDA])	0005198 // structural molecule activity (PMID:16188940 [IDA])	Blood vessel epicardial substance	POPD1_HUMAN|POP1|BVES|POPDC1	protein	taxon:9606	20100412	UniProtKB			0.0174779	0.127095	3	0	5789	20	22	1	1	1	0	0	0	0
C5AR1	0.0665455	0.0665455	0.0665455	2.54033	0.876772	0.876772	0.876772	3.79087	8.76772e-07	3.79087	0.714671	0.474812	1	1	8.76772e-07	3.79087	0.714671	0.474812	1	1	UniProtKB	P21730	C5AR1		0006955 // immune response (PMID:9590258 [TAS]) /// 0007202 // activation of phospholipase C activity (PMID:7649993 [TAS]) /// 0000187 // activation of MAPK activity (PMID:7649993 [TAS]) /// 0007606 // sensory perception of chemical stimulus (PMID:9590258 [TAS]) /// 0032494 // response to peptidoglycan (GO_REF:0000019 [IEA] Ensembl:ENSMUSP00000060003) /// 0007165 // signal transduction (PMID:8702…	0005886 // plasma membrane (Reactome:REACT_22289 [TAS]) /// 0005886 // plasma membrane (Reactome:REACT_22239 [TAS]) /// 0005886 // plasma membrane (Reactome:REACT_14799 [TAS]) /// 0005887 // integral to plasma membrane (PMID:2007135 [TAS]) /// 0005886 // plasma membrane (Reactome:REACT_15538 [TAS])	0004944 // C5a anaphylatoxin receptor activity (GO_REF:0000019 [IEA] Ensembl:ENSMUSP00000060003)	C5a anaphylatoxin chemotactic receptor	C5AR_HUMAN|C5AR1|C5AR|C5R1	protein	taxon:9606	20030904	PINC			0.0432021	0.314157	1	1	2342	14	14	1	1	1	0	0	0	0
CD37	0.250361	0.250361	0.250361	2.54033	3.29863	3.29863	3.29863	3.79087	3.29863e-06	3.79087	1.38621	0.165681	1	1	3.29863e-06	3.79087	1.38622	0.165681	1	1	UniProtKB	Q96LM7, B7ZAN3, P11049	CD37		0002639 // positive regulation of immunoglobulin production (GO_REF:0000019 [IEA] Ensembl:ENSMUSP00000096061) /// 0002920 // regulation of humoral immune response (GO_REF:0000019 [IEA] Ensembl:ENSMUSP00000096061)	0001772 // immunological synapse (PMID:21930792 [IDA]) /// 0016021 // integral to membrane (GO_REF:0000037 [IEA] UniProtKB-KW:KW-0812) /// 0016021 // integral to membrane (GO_REF:0000038 [IEA] UniProtKB-KW:KW-0812)	0005515 // protein binding (PMID:22624718 [IPI] UniProtKB:P07948) /// 0005515 // protein binding (PMID:22624718 [IPI] UniProtKB:P43405) /// 0005515 // protein binding (PMID:21930792 [IPI] UniProtKB:P60033) /// 0005515 // protein binding (PMID:22624718 [IPI] UniProtKB:P29350) /// 0005515 // protein binding (PMID:21930792 [IPI] UniProtKB:Q6UWF3)	Leukocyte antigen CD37	B7ZAN3_HUMAN|CD37	protein	taxon:9606	20130119	UniProtKB			0.162537	1.18194	2	0	1245	10	10	2	2	1	0	0	1	1
CLEC9A	0.0931558	0.0931558	0.0931558	2.54033	1.22738	1.22738	1.22738	3.79087	1.22738e-06	3.79087	0.845574	0.39779	1	1	1.22738e-06	3.79087	0.845574	0.39779	1	1	UniProtKB	Q6UXN8	CLEC9A		0050715 // positive regulation of cytokine secretion (PMID:18408006 [IDA]) /// 0006898 // receptor-mediated endocytosis (PMID:18497879 [IDA]) /// 0006898 // receptor-mediated endocytosis (PMID:18408006 [IDA])	0016021 // integral to membrane (GO_REF:0000037 [IEA] UniProtKB-KW:KW-0812) /// 0009986 // cell surface (PMID:18408006 [IDA])	0030246 // carbohydrate binding (GO_REF:0000002 [IEA] InterPro:IPR001304)	C-type lectin domain family 9 member A	CLC9A_HUMAN|CLEC9A|UNQ9341/PRO34046	protein	taxon:9606	20110509	UniProtKB			0.0604778	0.439782	1	1	1673	21	25	1	1	1	0	0	0	0
COLEC12	0.149186	0.149186	0.149186	2.54033	1.9656	1.9656	1.9656	3.79087	1.9656e-06	3.79087	1.07007	0.284589	1	1	1.9656e-06	3.79087	1.07007	0.284589	1	1	UniProtKB	Q5KU26	COLEC12		0006910 // phagocytosis, recognition (PMID:11564734 [IDA]) /// 0051260 // protein homooligomerization (PMID:11564734 [NAS]) /// 0045087 // innate immune response (PMID:11564734 [TAS]) /// 0002221 // pattern recognition receptor signaling pathway (PMID:11564734 [IDA]) /// 0006952 // defense response (PMID:11162630 [TAS]) /// 0009756 // carbohydrate mediated signaling (PMID:11564734 [NAS])	0016021 // integral to membrane (PMID:11162630 [TAS]) /// 0005581 // collagen (GO_REF:0000037 [IEA] UniProtKB-KW:KW-0176)	0046872 // metal ion binding (GO_REF:0000037 [IEA] UniProtKB-KW:KW-0479) /// 0008329 // pattern recognition receptor activity (PMID:11564734 [IDA]) /// 0005044 // scavenger receptor activity (PMID:11162630 [TAS]) /// 0005534 // galactose binding (PMID:11564734 [NAS]) /// 0030169 // low-density lipoprotein binding (PMID:11564734 [IDA])	Collectin-12	COL12_HUMAN|CLP1|COLEC12|NSR2|SCARA4|SRCL	protein	taxon:9606	20130119	GOC			0.0968533	0.704296	1	1	3134	188	231	3	3	1	0	0	0	0
CTHRC1	0.103486	0.103486	0.103486	2.54033	1.36348	1.36348	1.36348	3.79087	1.36348e-06	3.79087	0.891225	0.372809	1	1	1.36348e-06	3.79087	0.891225	0.372809	1	1	UniProtKB	G3V141, Q96CG8, E5RK99	CTHRC1		0090103 /// 0090177 /// 0060071 // Wnt receptor signaling pathway, planar cell polarity pathway (GO_REF:0000019 [IEA] Ensembl:ENSMUSP00000070018) /// 0032092 // positive regulation of protein binding (GO_REF:0000019 [IEA] Ensembl:ENSMUSP00000070018) /// 0090090 /// 0045669 // positive regulation of osteoblast differentiation (GO_REF:0000019 [IEA] Ensembl:ENSMUSP00000070018) /// 0016477 // cell mi…	0005615 // extracellular space (PMID:18467647 [IDA]) /// 0005737 // cytoplasm (GO_REF:0000019 [IEA] Ensembl:ENSMUSP00000070018) /// 0005581 // collagen (GO_REF:0000037 [IEA] UniProtKB-KW:KW-0176) /// 0005581 // collagen (GO_REF:0000038 [IEA] UniProtKB-KW:KW-0176)	0005109 // frizzled binding (GO_REF:0000019 [IEA] Ensembl:ENSMUSP00000070018) /// 0017147 // Wnt-protein binding (GO_REF:0000019 [IEA] Ensembl:ENSMUSP00000070018)	Collagen triple helix repeat-containing protein 1	E5RK99_HUMAN|CTHRC1	protein	taxon:9606	20130119	ENSEMBL			0.0671842	0.488549	2	0	1506	11	11	1	1	1	0	0	0	0
EDA2R	0.0434364	0.0434364	0.0434364	2.54033	0.572296	0.572296	0.572296	3.79087	5.72296e-07	3.79087	0.577395	0.563672	1	1	5.72296e-07	3.79087	0.577396	0.563672	1	1	UniProtKB	E7EUS4, Q9HAV5	EDA2R		0046330 // positive regulation of JNK cascade (PMID:12270937 [IDA]) /// 0030154 // cell differentiation (GO_REF:0000037 [IEA] UniProtKB-KW:KW-0221) /// 0051092 // positive regulation of NF-kappaB transcription factor activity (PMID:11039935 [IDA]) /// 0008544 // epidermis development (PMID:11039935 [NAS]) /// 0009790 // embryonic development (PMID:12270937 [NAS]) /// 0033209 // tumor necrosis fac…	0005887 // integral to plasma membrane (GO_REF:0000002 [IEA] InterPro:IPR022319) /// 0016021 // integral to membrane (PMID:12270937 [IC] GO:0004872)	0004872 // receptor activity (PMID:11039935 [IDA]) /// 0005515 // protein binding (PMID:12270937 [IPI] UniProtKB:Q13114) /// 0005515 // protein binding (PMID:11039935 [IPI] UniProtKB:Q92838) /// 0005031 // tumor necrosis factor receptor activity (PMID:11039935 [NAS]) /// 0005515 // protein binding (PMID:12270937 [IPI] UniProtKB:Q9Y4K3)	Tumor necrosis factor receptor superfamily member 27	E7EUS4_HUMAN|EDA2R	protein	taxon:9606	20130119	InterPro			0.0281994	0.20506	3	0	3588	19	19	1	1	1	0	0	0	0
EPHA4	0.024551	0.024551	0.024551	2.54033	0.323472	0.323472	0.323472	3.79087	3.23472e-07	3.79087	0.434091	0.664222	1	1	3.23472e-07	3.79087	0.434091	0.664222	1	1	UniProtKB	P54764, B7Z6Q8, C9JIX8, E9PG71, C9JEM6, F5GZZ5, H7C2W7	EPHA4		0048681 // negative regulation of axon regeneration (GO_REF:0000019 [IEA] Ensembl:ENSMUSP00000027451) /// 0050770 // regulation of axonogenesis (GO_REF:0000024 [ISS] UniProtKB:Q03137) /// 0046777 // protein amino acid autophosphorylation (PMID:12775584 [IDA]) /// 0061001 /// 0032317 // regulation of Rap GTPase activity (GO_REF:0000024 [ISS] UniProtKB:Q03137) /// 0097156 /// 0032314 // regulation …	0030054 // cell junction (GO_REF:0000037 [IEA] UniProtKB-KW:KW-0965) /// 0030425 // dendrite (GO_REF:0000019 [IEA] Ensembl:ENSMUSP00000027451) /// 0014069 // postsynaptic density (GO_REF:0000039 [IEA] UniProtKB-SubCell:SL-0297) /// 0005887 // integral to plasma membrane (GO_REF:0000019 [IEA] Ensembl:ENSMUSP00000027451) /// 0005887 // integral to plasma membrane (GO_REF:0000002 [IEA] InterPro:IPR0…	0005515 // protein binding (PMID:12775584 [IPI] UniProtKB:O94989) /// 0046875 // ephrin receptor binding (GO_REF:0000019 [IEA] Ensembl:ENSRNOP00000051316) /// 0005524 // ATP binding (GO_REF:0000037 [IEA] UniProtKB-KW:KW-0067) /// 0004672 // protein kinase activity (PMID:12775584 [IDA]) /// 0005524 // ATP binding (GO_REF:0000002 [IEA] InterPro:IPR000719) /// 0004672 // protein kinase activity (GO_…	Ephrin type-A receptor 4	B7Z6Q8_HUMAN|EPHA4	protein	taxon:9606	20130119	InterPro			0.0159388	0.115903	1	0	6348	253	266	1	1	1	0	0	1	1
F13B	0.0702975	0.0702975	0.0702975	2.54033	0.926206	0.926206	0.926206	3.79087	9.26206e-07	3.79087	0.734542	0.462618	1	1	9.26206e-07	3.79087	0.734542	0.462618	1	1	UniProtKB	P05160	F13B		0007596 // blood coagulation (Reactome:REACT_1439 [TAS]) /// 0007596 // blood coagulation (Reactome:REACT_2051 [TAS]) /// 0007596 // blood coagulation (Reactome:REACT_604 [TAS])	0005576 // extracellular region (Reactome:REACT_1314 [TAS]) /// 0005576 // extracellular region (Reactome:REACT_1536 [TAS]) /// 0005576 // extracellular region (PMID:14718574 [NAS])		Coagulation factor XIII B chain	F13B_HUMAN|F13B	protein	taxon:9606	20040415	UniProtKB			0.045638	0.33187	1	0	2217	9	9	1	1	1	0	0	1	1
FAM46D	0.0483555	0.0483555	0.0483555	2.54033	0.637108	0.637108	0.637108	3.79087	6.37108e-07	3.79087	0.609213	0.542383	1	1	6.37108e-07	3.79087	0.609213	0.542383	1	1																0.0313929	0.228283	2	0	3223	58	60	1	1	1	0	0	1	1
FAM71E2	0.0489631	0.0489631	0.0489631	2.54033	0.645115	0.645115	0.645115	3.79087	6.45115e-07	3.79087	0.613029	0.539857	1	1	6.45115e-07	3.79087	0.613029	0.539857	1	1																0.0317874	0.231151	1	0	3183	8	8	1	1	1	0	0	1	1
GALNTL1	0.0361684	0.0361684	0.0361684	2.54033	0.476537	0.476537	0.476537	3.79087	4.76537e-07	3.79087	0.52688	0.598277	1	1	4.76537e-07	3.79087	0.52688	0.598277	1	1	UniProtKB	Q8N428	GALNTL1		0006486 // protein amino acid glycosylation (GO_REF:0000041 [IEA] UniPathway:UPA00378)	0016021 // integral to membrane (GO_REF:0000037 [IEA] UniProtKB-KW:KW-0812) /// 0000139 // Golgi membrane (GO_REF:0000039 [IEA] UniProtKB-SubCell:SL-0134)	0004653 // polypeptide N-acetylgalactosaminyltransferase activity (GO_REF:0000003 [IEA] EC:2.4.1.41)	Putative polypeptide N-acetylgalactosaminyltransferase-like protein 1	GLTL1_HUMAN|GALNTL1|KIAA1130	protein	taxon:9606	20130119	UniProtKB			0.0234809	0.170748	2	0	4309	55	56	1	1	1	0	0	0	0
GCGR	0.0759872	0.0759872	0.0759872	2.54033	1.00117	1.00117	1.00117	3.79087	1.00117e-06	3.79087	0.76369	0.445052	1	1	1.00117e-06	3.79087	0.76369	0.445052	1	1	UniProtKB	I3L454, P47871, I3L1L8	GCGR		0007584 // response to nutrient (PMID:7773293 [TAS]) /// 0007189 // activation of adenylate cyclase activity by G-protein signaling pathway (GO_REF:0000019 [IEA] Ensembl:ENSRNOP00000051845) /// 0006112 // energy reserve metabolic process (Reactome:REACT_1505 [TAS]) /// 0006091 // generation of precursor metabolites and energy (PMID:7773293 [TAS]) /// 0044281 /// 0009755 // hormone-mediated signal…	0005886 // plasma membrane (GO_REF:0000040 [IEA] UniProtKB-SubCell:SL-0039) /// 0005886 // plasma membrane (Reactome:REACT_156 [TAS]) /// 0005886 // plasma membrane (Reactome:REACT_17008 [TAS]) /// 0005886 // plasma membrane (Reactome:REACT_15291 [TAS]) /// 0005886 // plasma membrane (Reactome:REACT_22268 [TAS]) /// 0005886 // plasma membrane (GO_REF:0000019 [IEA] Ensembl:ENSRNOP00000051845) /// …	0004967 // glucagon receptor activity (GO_REF:0000002 [IEA] InterPro:IPR003290|InterPro:IPR003291) /// 0017046 // peptide hormone binding (GO_REF:0000019 [IEA] Ensembl:ENSRNOP00000051845) /// 0005085 // guanyl-nucleotide exchange factor activity (Reactome:REACT_22110 [TAS]) /// 0004967 // glucagon receptor activity (GO_REF:0000019 [IEA] Ensembl:ENSRNOP00000051845)	Glucagon receptor	I3L1L8_HUMAN|GCGR	protein	taxon:9606	20130119	ENSEMBL			0.0493317	0.35873	1	1	2051	9	9	1	1	1	0	0	0	0
GPR1	0.0588112	0.0588112	0.0588112	2.54033	0.774868	0.774868	0.774868	3.79087	7.74868e-07	3.79087	0.671857	0.501675	1	1	7.74868e-07	3.79087	0.671857	0.501675	1	1	UniProtKB	C9J456, C9JKF3, C9JSU0, C9JCK1, C9JQB7, P46091	GPR1		0007186 // G-protein coupled receptor protein signaling pathway (GO_REF:0000002 [IEA] InterPro:IPR000276|InterPro:IPR002275) /// 0007186 // G-protein coupled receptor protein signaling pathway (PMID:7851889 [TAS]) /// 0007186 // G-protein coupled receptor protein signaling pathway (GO_REF:0000002 [IEA] InterPro:IPR002275)	0016021 // integral to membrane (GO_REF:0000002 [IEA] InterPro:IPR002275) /// 0005887 // integral to plasma membrane (PMID:7851889 [TAS]) /// 0016021 // integral to membrane (GO_REF:0000002 [IEA] InterPro:IPR000276|InterPro:IPR002275)	0004930 // G-protein coupled receptor activity (GO_REF:0000037 [IEA] UniProtKB-KW:KW-0297)	G-protein-coupled receptor 1	C9J456_HUMAN|GPR1	protein	taxon:9606	20130119	InterPro			0.0381809	0.277643	6	0	2650	51	56	1	1	1	0	0	0	0
GPRIN2 (NT_031847 516581..523604)	0.0854908	0.0854908	0.0854908	2.54033	1.12638	1.12638	1.12638	3.79087	1.12638e-06	3.79087	0.81004	0.417917	1	1	1.12638e-06	3.79087	0.81004	0.417917	1	1																0.0555016	0.403596	1	1	1823	0	2	0	1	0	0	0	0	0
HSPA6	0.0587668	0.0587668	0.0587668	2.54033	0.774283	0.774283	0.774283	3.79087	7.74283e-07	3.79087	0.671603	0.501836	1	1	7.74283e-07	3.79087	0.671603	0.501836	1	1	UniProtKB	P17066	HSPA6		0006986 // response to unfolded protein (PMID:2327978 [TAS])	0008180 // signalosome (PMID:18850735 [IDA])	0005524 // ATP binding (GO_REF:0000037 [IEA] UniProtKB-KW:KW-0067)	Heat shock 70 kDa protein 6	HSP76_HUMAN|HSP70B'|HSPA6	protein	taxon:9606	20130119	UniProtKB			0.0381521	0.277434	1	1	2652	1	1	1	1	1	0	0	0	0
KCNA4	0.0745871	0.0745871	0.0745871	2.54033	0.982723	0.982723	0.982723	3.79087	9.82723e-07	3.79087	0.756621	0.449277	1	1	9.82723e-07	3.79087	0.756621	0.449277	1	1	UniProtKB	P22459	KCNA4		0051260 // protein homooligomerization (GO_REF:0000002 [IEA] InterPro:IPR003131) /// 0006813 // potassium ion transport (PMID:2001794 [TAS]) /// 0007268 // synaptic transmission (Reactome:REACT_13685 [TAS])	0005886 // plasma membrane (Reactome:REACT_75857 [TAS]) /// 0008076 // voltage-gated potassium channel complex (GO_REF:0000002 [IEA] InterPro:IPR003091|InterPro:IPR003968|InterPro:IPR003972)	0005249 // voltage-gated potassium channel activity (PMID:2001794 [TAS]) /// 0005251 // delayed rectifier potassium channel activity (GO_REF:0000033 [IBA] PANTHER:PTN000165728) /// 0005515 // protein binding (PMID:7477295 [IPI] UniProtKB:P78352) /// 0030955 // potassium ion binding (GO_REF:0000002 [IEA] InterPro:IPR012897)	Potassium voltage-gated channel subfamily A member 4	KCNA4_HUMAN|KCNA4L|KCNA4	protein	taxon:9606	20030904	PINC			0.0484228	0.35212	1	1	4179	9	9	2	2	1	0	0	0	0
LY75-CD302	0.262108	0.262108	0.262108	2.54033	3.45341	3.45341	3.45341	3.79087	3.45341e-06	3.79087	1.41836	0.156085	1	1	3.45341e-06	3.79087	1.41836	0.156085	1	1																0.170164	1.23739	2	0	8919	7	122	1	15	0.0666667	1	1	0	2
MAP1LC3B2	1.31124	1.31124	1.31124	2.54033	17.2762	17.2762	17.2762	3.79087	1.72762e-05	3.79087	3.17242	0.00151176	0.0840216	1	1.72762e-05	3.79087	3.17242	0.00151175	0.0840209	1	UniProtKB	A6NCE7	MAP1LC3B2		0006914 // autophagy (GO_REF:0000037 [IEA] UniProtKB-KW:KW-0072)	0005874 // microtubule (GO_REF:0000037 [IEA] UniProtKB-KW:KW-0493) /// 0000421 // autophagic vacuole membrane (GO_REF:0000039 [IEA] UniProtKB-SubCell:SL-0022) /// 0012505 // endomembrane system (GO_REF:0000039 [IEA] UniProtKB-SubCell:SL-0147) /// 0031410 // cytoplasmic vesicle (GO_REF:0000037 [IEA] UniProtKB-KW:KW-0968)		Microtubule-associated proteins 1A/1B light chain 3 beta 2	MP3B2_HUMAN|MAP1LC3B2	protein	taxon:9606	20130119	UniProtKB			0.851269	6.19025	1	1	832	16	21	3	7	0.428571	0	0	0	0
MARCH4	0.0700448	0.0700448	0.0700448	2.54033	0.922876	0.922876	0.922876	3.79087	9.22876e-07	3.79087	0.733221	0.463424	1	1	9.22876e-07	3.79087	0.733221	0.463424	1	1	UniProtKB	Q9P2E8	MARCH4			0005795 // Golgi stack (PMID:14722266 [IDA]) /// 0005802 // trans-Golgi network (PMID:14722266 [IDA]) /// 0016021 // integral to membrane (GO_REF:0000037 [IEA] UniProtKB-KW:KW-0812) /// 0000139 // Golgi membrane (GO_REF:0000039 [IEA] UniProtKB-SubCell:SL-0134)	0008270 // zinc ion binding (GO_REF:0000002 [IEA] InterPro:IPR011016) /// 0004842 // ubiquitin-protein ligase activity (PMID:14722266 [IDA]) /// 0046872 // metal ion binding (GO_REF:0000037 [IEA] UniProtKB-KW:KW-0479)	E3 ubiquitin-protein ligase MARCH4	MARH4_HUMAN|KIAA1399|MARCH4|RNF174	protein	taxon:9606	20130119	UniProtKB			0.0454739	0.330676	1	1	4450	141	151	2	2	1	0	0	1	1
MYCL1	0.0314784	0.0314784	0.0314784	2.54033	0.414744	0.414744	0.414744	3.79087	4.14744e-07	3.79087	0.491533	0.623049	1	1	4.14744e-07	3.79087	0.491534	0.623049	1	1	UniProtKB	E9PQS5, P12524	MYCL1		0006355 // regulation of transcription, DNA-dependent (GO_REF:0000029 [NAS])	0005634 // nucleus (GO_REF:0000002 [IEA] InterPro:IPR002418|InterPro:IPR012682) /// 0005634 // nucleus (GO_REF:0000029 [NAS])	0003677 // DNA binding (PMID:3322939 [NAS]) /// 0003677 // DNA binding (PMID:10597290 [TAS]) /// 0003700 // transcription factor activity (GO_REF:0000029 [NAS]) /// 0046983 // protein dimerization activity (GO_REF:0000002 [IEA] InterPro:IPR011598) /// 0003700 // transcription factor activity (GO_REF:0000002 [IEA] InterPro:IPR002418|InterPro:IPR012682)	Protein L-Myc-1	E9PQS5_HUMAN|MYCL1	protein	taxon:9606	20130119	InterPro			0.0204362	0.148607	3	0	4951	3	3	1	1	1	0	0	0	0
NCMAP	0.0390503	0.0390503	0.0390503	2.54033	0.514508	0.514508	0.514508	3.79087	5.14508e-07	3.79087	0.547468	0.584057	1	1	5.14508e-07	3.79087	0.547468	0.584057	1	1	UniProtKB	Q5T1S8	NCMAP		0031643 // positive regulation of myelination (GO_REF:0000024 [ISS] UniProtKB:F1M2Z5) /// 0032290 // myelin formation in the peripheral nervous system (GO_REF:0000024 [ISS] UniProtKB:F1M2Z5)	0005887 // integral to plasma membrane (GO_REF:0000024 [ISS] UniProtKB:Q99JS0) /// 0043220 // Schmidt-Lanterman cleft (GO_REF:0000024 [ISS] UniProtKB:F1M2Z5) /// 0033270 // paranode region of axon (GO_REF:0000024 [ISS] UniProtKB:F1M2Z5)	0019911 // structural constituent of myelin sheath (GO_REF:0000024 [ISS] UniProtKB:F1M2Z5)	Noncompact myelin-associated protein	NCMAP_HUMAN|C1orf130|NCMAP	protein	taxon:9606	20120803	UniProtKB			0.0253519	0.184354	1	1	3991	85	97	1	1	1	0	0	0	0
PARP15	0.0558001	0.0558001	0.0558001	2.54033	0.735195	0.735195	0.735195	3.79087	7.35195e-07	3.79087	0.654431	0.512834	1	1	7.35195e-07	3.79087	0.654432	0.512834	1	1	UniProtKB	B7ZL48, J3KR47, Q460N3, C9J7L3	PARP15		0006355 // regulation of transcription, DNA-dependent (GO_REF:0000037 [IEA] UniProtKB-KW:KW-0805) /// 0006351 // transcription, DNA-dependent (GO_REF:0000037 [IEA] UniProtKB-KW:KW-0804)	0005634 // nucleus (GO_REF:0000039 [IEA] UniProtKB-SubCell:SL-0191)	0003950 // NAD+ ADP-ribosyltransferase activity (GO_REF:0000003 [IEA] EC:2.4.2.30) /// 0003950 // NAD+ ADP-ribosyltransferase activity (GO_REF:0000002 [IEA] InterPro:IPR012317)	PARP15 protein	B7ZL48_HUMAN|PARP15	protein	taxon:9606	20130119	InterPro			0.0362261	0.263428	2	1	2793	32	42	1	1	1	0	0	0	0
PKNOX2	0.0417827	0.0417827	0.0417827	2.54033	0.550509	0.550509	0.550509	3.79087	5.50509e-07	3.79087	0.566298	0.571191	1	1	5.50509e-07	3.79087	0.566298	0.571191	1	1	UniProtKB	B7ZAF3, F5GZ15, E9PKL2, Q96KN3, E9PRB6, H0YLX0	PKNOX2		0006357 // regulation of transcription from RNA polymerase II promoter (GO_REF:0000019 [IEA] Ensembl:ENSMUSP00000135249)	0015629 // actin cytoskeleton (GO_REF:0000019 [IEA] Ensembl:ENSMUSP00000135249) /// 0015630 // microtubule cytoskeleton (GO_REF:0000019 [IEA] Ensembl:ENSMUSP00000135249) /// 0005634 // nucleus (GO_REF:0000019 [IEA] Ensembl:ENSMUSP00000135249) /// 0005634 // nucleus (GO_REF:0000039 [IEA] UniProtKB-SubCell:SL-0191) /// 0005737 // cytoplasm (GO_REF:0000019 [IEA] Ensembl:ENSMUSP00000135249) /// 00056…	0003785 // actin monomer binding (GO_REF:0000019 [IEA] Ensembl:ENSMUSP00000135249) /// 0043565 // sequence-specific DNA binding (GO_REF:0000002 [IEA] InterPro:IPR001356) /// 0051015 // actin filament binding (GO_REF:0000019 [IEA] Ensembl:ENSMUSP00000135249) /// 0003700 // transcription factor activity (GO_REF:0000002 [IEA] InterPro:IPR001356) /// 0043565 // sequence-specific DNA binding (GO_REF:0…	Homeobox protein PKNOX2	B7ZAF3_HUMAN|PKNOX2	protein	taxon:9606	20130119	InterPro			0.0271258	0.197253	1	1	3730	189	201	1	1	1	0	0	0	0
PLEKHB1	0.0538899	0.0538899	0.0538899	2.54033	0.710028	0.710028	0.710028	3.79087	7.10028e-07	3.79087	0.643133	0.520138	1	1	7.10028e-07	3.79087	0.643133	0.520138	1	1	UniProtKB	F5GXN2, F5GZH3, F5GY96, F5H0R6, F5GZ38, F5H3M1, Q9UF11, F5H866, F5H4T3, F5GY87, F5H114, F5H1B8, F5H190	PLEKHB1		0007275 // multicellular organismal development (GO_REF:0000037 [IEA] UniProtKB-KW:KW-0217) /// 0007602 // phototransduction (PMID:10585447 [NAS])	0016021 // integral to membrane (PMID:10585447 [IDA]) /// 0005737 // cytoplasm (GO_REF:0000039 [IEA] UniProtKB-SubCell:SL-0086)	0042803 // protein homodimerization activity (GO_REF:0000019 [IEA] Ensembl:ENSMUSP00000078175) /// 0004871 // signal transducer activity (PMID:10585447 [TAS]) /// 0005543 // phospholipid binding (GO_REF:0000002 [IEA] InterPro:IPR001849) /// 0008022 // protein C-terminus binding (GO_REF:0000019 [IEA] Ensembl:ENSMUSP00000078175)	Pleckstrin homology domain-containing family B member 1	F5GXN2_HUMAN|PLEKHB1	protein	taxon:9606	20130119	InterPro			0.034986	0.25441	5	0	2892	9	9	1	1	1	0	0	0	0
POM121L2	0.0491639	0.0491639	0.0491639	2.54033	0.64776	0.64776	0.64776	3.79087	6.4776e-07	3.79087	0.614285	0.539027	1	1	6.4776e-07	3.79087	0.614285	0.539027	1	1																0.0319178	0.232099	1	1	3170	1	1	1	1	1	0	0	0	0
SLC38A4	0.0391287	0.0391287	0.0391287	2.54033	0.515541	0.515541	0.515541	3.79087	5.15541e-07	3.79087	0.548018	0.58368	1	1	5.15541e-07	3.79087	0.548018	0.58368	1	1	UniProtKB	F8VQY9, Q969I6, F8VRD9, H0YHZ8	SLC38A4		0006814 // sodium ion transport (GO_REF:0000037 [IEA] UniProtKB-KW:KW-0739) /// 0006811 // ion transport (Reactome:REACT_19397 [TAS]) /// 0055085 // transmembrane transport (Reactome:REACT_15518 [TAS]) /// 0006865 // amino acid transport (Reactome:REACT_13796 [TAS]) /// 0055085 // transmembrane transport (Reactome:REACT_19118 [TAS])	0016021 // integral to membrane (GO_REF:0000037 [IEA] UniProtKB-KW:KW-0812) /// 0016021 // integral to membrane (GO_REF:0000038 [IEA] UniProtKB-KW:KW-0812) /// 0005886 // plasma membrane (Reactome:REACT_13736 [TAS])	0015293 // symporter activity (GO_REF:0000037 [IEA] UniProtKB-KW:KW-0769) /// 0015171 // amino acid transmembrane transporter activity (GO_REF:0000019 [IEA] Ensembl:ENSRNOP00000009187)	Sodium-coupled neutral amino acid transporter 4	F8VQY9_HUMAN|SLC38A4	protein	taxon:9606	20130119	ENSEMBL			0.0254028	0.184724	2	0	3983	2	27	0	1	0	0	0	0	0
SLC4A9	0.0458381	0.0458381	0.0458381	2.54033	0.603941	0.603941	0.603941	3.79087	6.03941e-07	3.79087	0.593144	0.553085	1	1	6.03941e-07	3.79087	0.593144	0.553085	1	1	UniProtKB	Q96Q91	SLC4A9		0006811 // ion transport (Reactome:REACT_19397 [TAS]) /// 0015701 // bicarbonate transport (Reactome:REACT_19298 [TAS]) /// 0055085 // transmembrane transport (Reactome:REACT_15518 [TAS]) /// 0055085 // transmembrane transport (Reactome:REACT_19118 [TAS])	0005886 // plasma membrane (Reactome:REACT_19247 [TAS]) /// 0016323 // basolateral plasma membrane (GO_REF:0000019 [IEA] Ensembl:ENSRNOP00000025137) /// 0016021 // integral to membrane (GO_REF:0000037 [IEA] UniProtKB-KW:KW-0812) /// 0045177 // apical part of cell (GO_REF:0000019 [IEA] Ensembl:ENSMUSP00000111358)	5452	Anion exchange protein 4	B3A4_HUMAN|AE4|SLC4A9|SBC5	protein	taxon:9606	20130119	InterPro			0.0297586	0.216399	4	0	3400	13	13	1	1	1	0	0	0	0
SLITRK2 (NT_011681 1342022..1350036)	0.0705681	0.0705681	0.0705681	2.54033	0.929771	0.929771	0.929771	3.79087	9.29771e-07	3.79087	0.735955	0.461758	1	1	9.29771e-07	3.79087	0.735955	0.461758	1	1																0.0458136	0.333147	8	0	4417	0	3	0	2	0	0	0	0	1
SPDEF	0.162852	0.162852	0.162852	2.54033	2.14566	2.14566	2.14566	3.79087	2.14566e-06	3.79087	1.11801	0.263565	1	1	2.14566e-06	3.79087	1.11801	0.263565	1	1	UniProtKB	O95238	SPDEF		0010454 // negative regulation of cell fate commitment (GO_REF:0000019 [IEA] Ensembl:ENSMUSP00000110520) /// 0045944 // positive regulation of transcription from RNA polymerase II promoter (GO_REF:0000019 [IEA] Ensembl:ENSMUSP00000110520) /// 0043065 // positive regulation of apoptosis (PMID:21229552 [IDA]) /// 0006351 // transcription, DNA-dependent (GO_REF:0000037 [IEA] UniProtKB-KW:KW-0804) //…	0005634 // nucleus (GO_REF:0000039 [IEA] UniProtKB-SubCell:SL-0191)	0043565 // sequence-specific DNA binding (GO_REF:0000002 [IEA] InterPro:IPR000418|InterPro:IPR003118) /// 0003700 // transcription factor activity (GO_REF:0000002 [IEA] InterPro:IPR000418)	SAM pointed domain-containing Ets transcription factor	SPDEF_HUMAN|SPDEF|PDEF|PSE	protein	taxon:9606	20110120	BHF-UCL			0.105726	0.768814	2	1	1914	14	14	2	2	1	1	1	0	0
TCF24	0.190836	0.190836	0.190836	2.54033	2.51437	2.51437	2.51437	3.79087	2.51437e-06	3.79087	1.21026	0.22618	1	1	2.51437e-06	3.79087	1.21026	0.22618	1	1	UniProtKB	Q7RTU0	TCF24		0006355 // regulation of transcription, DNA-dependent (GO_REF:0000037 [IEA] UniProtKB-KW:KW-0805) /// 0006351 // transcription, DNA-dependent (GO_REF:0000037 [IEA] UniProtKB-KW:KW-0804)	0005634 // nucleus (GO_REF:0000039 [IEA] UniProtKB-SubCell:SL-0191)	0003677 // DNA binding (GO_REF:0000037 [IEA] UniProtKB-KW:KW-0238) /// 0046983 // protein dimerization activity (GO_REF:0000002 [IEA] InterPro:IPR011598)	Transcription factor 24	TCF24_HUMAN|TCF24	protein	taxon:9606	20130119	UniProtKB			0.123893	0.900924	1	1	2450	14	14	3	3	1	1	1	0	0
TIE1	0.0391385	0.0391385	0.0391385	2.54033	0.51567	0.51567	0.51567	3.79087	5.1567e-07	3.79087	0.548086	0.583633	1	1	5.1567e-07	3.79087	0.548086	0.583633	1	1	UniProtKB	P35590, E9PG63	TIE1		0016525 // negative regulation of angiogenesis (GO_REF:0000019 [IEA] Ensembl:ENSMUSP00000037129) /// 0007165 // signal transduction (PMID:1312667 [TAS]) /// 0032526 // response to retinoic acid (GO_REF:0000019 [IEA] Ensembl:ENSMUSP00000037129) /// 0007498 // mesoderm development (PMID:7596437 [TAS]) /// 0045026 // plasma membrane fusion (GO_REF:0000019 [IEA] Ensembl:ENSMUSP00000037129) /// 000152…	0005887 // integral to plasma membrane (PMID:1312667 [TAS]) /// 0005886 // plasma membrane (GO_REF:0000019 [IEA] Ensembl:ENSMUSP00000037129) /// 0016021 // integral to membrane (GO_REF:0000038 [IEA] UniProtKB-KW:KW-0812)	0004714 // transmembrane receptor protein tyrosine kinase activity (GO_REF:0000003 [IEA] EC:2.7.10.1) /// 0005524 // ATP binding (GO_REF:0000037 [IEA] UniProtKB-KW:KW-0067) /// 0005524 // ATP binding (GO_REF:0000038 [IEA] UniProtKB-KW:KW-0067) /// 0004713 // protein tyrosine kinase activity (GO_REF:0000038 [IEA] UniProtKB-KW:KW-0829) /// 0005515 // protein binding (PMID:21982860 [IPI] UniProtKB:Q…	Tyrosine-protein kinase receptor Tie-1	E9PG63_HUMAN|TIE1	protein	taxon:9606	20130119	ENSEMBL			0.0254092	0.18477	2	1	3982	5	5	1	1	1	0	0	0	0
TMEM232	0.0488098	0.0488098	0.0488098	2.54033	0.643094	0.643094	0.643094	3.79087	6.43094e-07	3.79087	0.612069	0.540492	1	1	6.43094e-07	3.79087	0.612069	0.540492	1	1	UniProtKB	C9JQI7	TMEM232			0016021 // integral to membrane (GO_REF:0000037 [IEA] UniProtKB-KW:KW-0812)		Transmembrane protein 232	TM232_HUMAN|TMEM232	protein	taxon:9606	20130119	UniProtKB			0.0316879	0.230427	1	1	3193	338	388	1	1	1	1	1	0	0
VWA3B	0.0656624	0.0656624	0.0656624	2.54033	0.865136	0.865136	0.865136	3.79087	8.65136e-07	3.79087	0.709913	0.477758	1	1	8.65136e-07	3.79087	0.709913	0.477758	1	1																0.0426288	0.309987	1	1	4747	186	203	2	2	1	0	0	1	1
ZSCAN5D	0.103692	0.103692	0.103692	2.54033	1.3662	1.3662	1.3662	3.79087	1.3662e-06	3.79087	0.892114	0.372332	1	1	1.3662e-06	3.79087	0.892114	0.372332	1	1	UniProtKB	P0CG00	ZSCAN5D		0006351 // transcription, DNA-dependent (GO_REF:0000037 [IEA] UniProtKB-KW:KW-0804) /// 0016032 // viral reproduction (GO_REF:0000002 [IEA] InterPro:IPR008916)	0005634 // nucleus (GO_REF:0000039 [IEA] UniProtKB-SubCell:SL-0191)	0046872 // metal ion binding (GO_REF:0000037 [IEA] UniProtKB-KW:KW-0479) /// 0003676 // nucleic acid binding (GO_REF:0000002 [IEA] InterPro:IPR013087) /// 0008270 // zinc ion binding (GO_REF:0000002 [IEA] InterPro:IPR007087|InterPro:IPR015880) /// 0003700 // transcription factor activity (GO_REF:0000002 [IEA] InterPro:IPR003309)	Putative zinc finger and SCAN domain-containing protein 5D	ZSA5D_HUMAN|ZSCAN5D	protein	taxon:9606	20130119	InterPro			0.0673183	0.489524	1	0	1503	2	2	1	1	1	0	0	1	1
ACE	0.029862	0.029862	0.029862	2.54033	0.393447	0.393447	0.393447	3.79087	3.93447e-07	3.79087	0.478747	0.632119	1	1	3.93447e-07	3.79087	0.478747	0.632119	1	1	UniProtKB	J3KS28, J3QLR4, J3KTH9, J3KRH5, J3QRX8, P12821, F5H1K1, J3KTB8, J3KSQ5, F6X3S4	ACE		0032943 // mononuclear cell proliferation (PMID:7876104 [IC] GO:0042447) /// 0050482 // arachidonic acid secretion (PMID:17077303 [IDA]) /// 0019229 // regulation of vasoconstriction (PMID:1668266 [IC] GO:0008237) /// 0006508 // proteolysis (GO_REF:0000037 [IEA] UniProtKB-KW:KW-0645) /// 0001822 // kidney development (PMID:16116425 [IMP]) /// 0001974 // blood vessel remodeling (PMID:1668266 [IC] …	0005768 // endosome (PMID:17077303 [IDA]) /// 0016020 // membrane (GO_REF:0000002 [IEA] InterPro:IPR001548) /// 0005615 // extracellular space (PMID:15283675 [IDA]) /// 0005886 // plasma membrane (PMID:16186248 [IDA]) /// 0016021 // integral to membrane (GO_REF:0000037 [IEA] UniProtKB-KW:KW-0812) /// 0005886 // plasma membrane (PMID:17077303 [IDA]) /// 0009897 // external side of plasma membrane …	0008237 // metallopeptidase activity (GO_REF:0000002 [IEA] InterPro:IPR001548) /// 0003779 // actin binding (PMID:16186248 [IDA]) /// 0008241 // peptidyl-dipeptidase activity (PMID:1668266 [IDA]) /// 0008241 // peptidyl-dipeptidase activity (PMID:1320019 [IDA]) /// 0008237 // metallopeptidase activity (PMID:1320019 [IDA]) /// 0031404 // chloride ion binding (PMID:12540854 [IDA]) /// 0008237 // me…	Angiotensin-converting enzyme	F5H1K1_HUMAN|ACE	protein	taxon:9606	20130119	InterPro			0.0193867	0.140976	3	0	5219	6	6	1	1	1	0	0	1	1
ADAM19	0.0721415	0.0721415	0.0721415	2.54033	0.950501	0.950501	0.950501	3.79087	9.50501e-07	3.79087	0.744114	0.456808	1	1	9.50501e-07	3.79087	0.744114	0.456808	1	1	UniProtKB	H0YC66, E5RIS2, E7ENW4, E9PD32, Q9H013	ADAM19		0006509 // membrane protein ectodomain proteolysis (GO_REF:0000019 [IEA] Ensembl:ENSMUSP00000011400) /// 0007507 // heart development (GO_REF:0000019 [IEA] Ensembl:ENSMUSP00000011400) /// 0006508 // proteolysis (GO_REF:0000002 [IEA] InterPro:IPR001590|InterPro:IPR002870) /// 0006508 // proteolysis (GO_REF:0000002 [IEA] InterPro:IPR001590|InterPro:IPR006586) /// 0006508 // proteolysis (GO_REF:0000…	0016021 // integral to membrane (GO_REF:0000037 [IEA] UniProtKB-KW:KW-0812)	0017124 // SH3 domain binding (GO_REF:0000037 [IEA] UniProtKB-KW:KW-0729) /// 0046872 // metal ion binding (GO_REF:0000037 [IEA] UniProtKB-KW:KW-0479) /// 0004222 // metalloendopeptidase activity (GO_REF:0000002 [IEA] InterPro:IPR006586) /// 0004222 // metalloendopeptidase activity (GO_REF:0000002 [IEA] InterPro:IPR001590|InterPro:IPR002870) /// 0004222 // metalloendopeptidase activity (GO_REF:00…	Disintegrin and metalloproteinase domain-containing protein 19	E5RIS2_HUMAN|ADAM19	protein	taxon:9606	20130119	InterPro			0.0468351	0.340575	1	1	6481	167	180	3	3	1	0	0	1	1
ADAM23	0.0509979	0.0509979	0.0509979	2.54033	0.671924	0.671924	0.671924	3.79087	6.71924e-07	3.79087	0.625638	0.531553	1	1	6.71924e-07	3.79087	0.625638	0.531553	1	1	UniProtKB	O75077, E7EWD3	ADAM23		0007417 // central nervous system development (PMID:9693107 [TAS]) /// 0007155 // cell adhesion (GO_REF:0000037 [IEA] UniProtKB-KW:KW-0130) /// 0006508 // proteolysis (GO_REF:0000002 [IEA] InterPro:IPR001590|InterPro:IPR002870|InterPro:IPR006586)	0005887 // integral to plasma membrane (PMID:9693107 [TAS]) /// 0005576 // extracellular region (GO_REF:0000039 [IEA] UniProtKB-SubCell:SL-0243)	0005515 // protein binding (PMID:20463223 [IPI] UniProtKB:O95970) /// 0008270 // zinc ion binding (GO_REF:0000002 [IEA] InterPro:IPR002870) /// 0004222 // metalloendopeptidase activity (GO_REF:0000002 [IEA] InterPro:IPR001590|InterPro:IPR002870|InterPro:IPR006586) /// 0008237 // metallopeptidase activity (PMID:9693107 [TAS]) /// 0005178 // integrin binding (PMID:9693107 [TAS])	Disintegrin and metalloproteinase domain-containing protein 23	E7EWD3_HUMAN|ADAM23	protein	taxon:9606	20130119	InterPro			0.0331084	0.240758	1	1	3056	103	115	1	1	1	0	0	0	0
AKR1B10	0.0976502	0.0976502	0.0976502	2.54033	1.28659	1.28659	1.28659	3.79087	1.28659e-06	3.79087	0.865732	0.386637	1	1	1.28659e-06	3.79087	0.865732	0.386637	1	1	UniProtKB	O60218	AKR1B10		0044598 /// 0016488 // farnesol catabolic process (PMID:21187079 [IDA]) /// 0044597 /// 0006081 // cellular aldehyde metabolic process (PMID:9565553 [TAS]) /// 0008202 // steroid metabolic process (PMID:9565553 [TAS]) /// 0007586 // digestion (PMID:9565553 [TAS])	0005764 // lysosome (GO_REF:0000039 [IEA] UniProtKB-SubCell:SL-0158) /// 0005576 // extracellular region (GO_REF:0000039 [IEA] UniProtKB-SubCell:SL-0243) /// 0005575 // cellular_component (GO_REF:0000015 [ND])	0045550 // geranylgeranyl reductase activity (PMID:21187079 [IDA]) /// 0047718 // indanol dehydrogenase activity (PMID:20837989 [IDA]) /// 0004033 // aldo-keto reductase activity (PMID:9565553 [TAS]) /// 0005515 // protein binding (PMID:18056116 [IPI] UniProtKB:Q13085) /// 0001758 // retinal dehydrogenase activity (PMID:21851338 [IDA])	Aldo-keto reductase family 1 member B10	AK1BA_HUMAN|AKR1B10|AKR1B11	protein	taxon:9606	20120119	UniProtKB			0.0633956	0.460999	1	1	1596	4	4	1	1	1	1	1	0	0
APBB1IP	0.118202	0.118202	0.118202	2.54033	1.55738	1.55738	1.55738	3.79087	1.55738e-06	3.79087	0.952488	0.340849	1	1	1.55738e-06	3.79087	0.952489	0.340849	1	1	UniProtKB	Q7Z5R6, Q9NWJ6	APBB1IP		0007165 // signal transduction (GO_REF:0000002 [IEA] InterPro:IPR000159) /// 0030168 // platelet activation (Reactome:REACT_798 [TAS]) /// 0007596 // blood coagulation (Reactome:REACT_604 [TAS])	0005829 // cytosol (Reactome:REACT_15545 [TAS]) /// 0005829 // cytosol (Reactome:REACT_15323 [TAS]) /// 0005829 // cytosol (Reactome:REACT_15349 [TAS]) /// 0005829 // cytosol (Reactome:REACT_22439 [TAS]) /// 0030027 // lamellipodium (GO_REF:0000039 [IEA] UniProtKB-SubCell:SL-0291) /// 0005829 // cytosol (Reactome:REACT_23821 [TAS]) /// 0005925 // focal adhesion (GO_REF:0000039 [IEA] UniProtKB-Sub…	0005543 // phospholipid binding (GO_REF:0000002 [IEA] InterPro:IPR001849)	Amyloid beta A4 precursor protein-binding family B member 1-interacting protein	AB1IP_HUMAN|PREL1|APBB1IP|RARP1|RIAM	protein	taxon:9606	20130119	InterPro			0.0767383	0.558024	1	1	2637	134	148	2	2	1	2	2	0	0
B3GAT2	0.0809609	0.0809609	0.0809609	2.54033	1.0667	1.0667	1.0667	3.79087	1.0667e-06	3.79087	0.788287	0.430529	1	1	1.0667e-06	3.79087	0.788287	0.430529	1	1	UniProtKB	Q9NPZ5	B3GAT2		0030204 // chondroitin sulfate metabolic process (Reactome:REACT_121206 [TAS]) /// 0005975 // carbohydrate metabolic process (Reactome:REACT_474 [TAS]) /// 0030203 // glycosaminoglycan metabolic process (Reactome:REACT_121408 [TAS]) /// 0044281 /// 0030203 // glycosaminoglycan metabolic process (Reactome:REACT_121314 [TAS]) /// 0006486 // protein amino acid glycosylation (GO_REF:0000041 [IEA] Uni…	0016021 // integral to membrane (GO_REF:0000037 [IEA] UniProtKB-KW:KW-0812) /// 0000139 // Golgi membrane (Reactome:REACT_120897 [TAS])	0046872 // metal ion binding (GO_REF:0000037 [IEA] UniProtKB-KW:KW-0479) /// 0015018 // galactosylgalactosylxylosylprotein 3-beta-glucuronosyltransferase activity (GO_REF:0000024 [ISS] UniProtKB:Q9Z137)	Galactosylgalactosylxylosylprotein 3-beta-glucuronosyltransferase 2	B3GA2_HUMAN|B3GAT2|GLCATS|KIAA1963	protein	taxon:9606	20111101	Reactome			0.0525607	0.38221	1	0	1925	102	115	0	1	0	0	0	0	1
BCL2L15	0.125357	0.125357	0.125357	2.54033	1.65164	1.65164	1.65164	3.79087	1.65164e-06	3.79087	0.980891	0.326647	1	1	1.65164e-06	3.79087	0.980891	0.326647	1	1	UniProtKB	Q5TBC7	BCL2L15		0006915 // apoptosis (GO_REF:0000037 [IEA] UniProtKB-KW:KW-0053)	0005829 // cytosol (GO_REF:0000019 [IEA] Ensembl:ENSMUSP00000052210) /// 0005634 // nucleus (GO_REF:0000019 [IEA] Ensembl:ENSMUSP00000052210)		Bcl-2-like protein 15	B2L15_HUMAN|BCL2L15|C1orf178	protein	taxon:9606	20130119	ENSEMBL			0.081383	0.5918	1	1	4973	0	5	0	4	0	0	0	0	0
CACNA1S	0.0252675	0.0252675	0.0252675	2.54033	0.332912	0.332912	0.332912	3.79087	3.32912e-07	3.79087	0.44038	0.659662	1	1	3.32912e-07	3.79087	0.44038	0.659662	1	1	UniProtKB	Q13698, B1ALM3	CACNA1S		0007528 // neuromuscular junction development (GO_REF:0000019 [IEA] Ensembl:ENSMUSP00000107699) /// 0007520 // myoblast fusion (GO_REF:0000019 [IEA] Ensembl:ENSMUSP00000107699) /// 0006816 // calcium ion transport (PMID:9852570 [IDA]) /// 0001501 // skeletal system development (GO_REF:0000019 [IEA] Ensembl:ENSMUSP00000107699) /// 0002074 // extraocular skeletal muscle development (GO_REF:0000019 …	0005737 // cytoplasm (PMID:11206130 [IDA]) /// 0005891 // voltage-gated calcium channel complex (GO_REF:0000002 [IEA] InterPro:IPR002077|InterPro:IPR005446|InterPro:IPR005450) /// 0005886 // plasma membrane (PMID:11206130 [IDA]) /// 0031674 // I band (PMID:11206130 [IDA]) /// 0005891 // voltage-gated calcium channel complex (PMID:9852570 [IDA]) /// 0030315 // T-tubule (PMID:17204937 [IDA]) /// 00…	0008331 // high voltage-gated calcium channel activity (PMID:9852570 [IDA]) /// 0005245 // voltage-gated calcium channel activity (PMID:9852570 [IDA]) /// 0005245 // voltage-gated calcium channel activity (GO_REF:0000002 [IEA] InterPro:IPR002077|InterPro:IPR005446|InterPro:IPR005450) /// 0046872 // metal ion binding (GO_REF:0000037 [IEA] UniProtKB-KW:KW-0479)	Voltage-dependent L-type calcium channel subunit alpha-1S	B1ALM3_HUMAN|CACNA1S|RP11-168O16.3-002	protein	taxon:9606	20130119	InterPro			0.0164039	0.119286	1	0	6168	29	29	1	1	1	0	0	1	1
CALCR	0.0390993	0.0390993	0.0390993	2.54033	0.515153	0.515153	0.515153	3.79087	5.15153e-07	3.79087	0.547811	0.583822	1	1	5.15153e-07	3.79087	0.547811	0.583822	1	1	UniProtKB	P30988, F5H605, A4D1G6	CALCR		0045762 // positive regulation of adenylate cyclase activity (PMID:7588285 [IDA]) /// 0043488 // regulation of mRNA stability (GO_REF:0000019 [IEA] Ensembl:ENSMUSP00000075070) /// 0007204 // elevation of cytosolic calcium ion concentration (PMID:8078488 [IDA]) /// 0045762 // positive regulation of adenylate cyclase activity (PMID:15563840 [IDA]) /// 0045762 // positive regulation of adenylate cyc…	0005887 // integral to plasma membrane (PMID:7619207 [NAS]) /// 0005886 // plasma membrane (Reactome:REACT_18391 [TAS]) /// 0005886 // plasma membrane (Reactome:REACT_17008 [TAS]) /// 0005886 // plasma membrane (GO_REF:0000040 [IEA] UniProtKB-SubCell:SL-0039) /// 0005886 // plasma membrane (Reactome:REACT_18403 [TAS]) /// 0030424 // axon (GO_REF:0000019 [IEA] Ensembl:ENSRNOP00000013910) /// 00058…	0004948 // calcitonin receptor activity (GO_REF:0000002 [IEA] InterPro:IPR001688|InterPro:IPR003287) /// 0004948 // calcitonin receptor activity (GO_REF:0000019 [IEA] Ensembl:ENSMUSP00000075070) /// 0032841 // calcitonin binding (PMID:8078488 [IDA]) /// 0008565 // protein transporter activity (PMID:14722252 [IDA]) /// 0004948 // calcitonin receptor activity (GO_REF:0000019 [IEA] Ensembl:ENSRNOP00…	Calcitonin receptor, isoform CRA_b	A4D1G6_HUMAN|tcag7.320|CALCR|hCG_17248	protein	taxon:9606	20130119	InterPro			0.0253837	0.184585	3	0	3986	209	238	1	1	1	1	1	0	0
CATSPERG	0.12555	0.12555	0.12555	2.54033	1.65419	1.65419	1.65419	3.79087	1.65419e-06	3.79087	0.981648	0.326273	1	1	1.65419e-06	3.79087	0.981648	0.326274	1	1	UniProtKB	Q6ZRH7	CATSPERG		0030154 // cell differentiation (GO_REF:0000037 [IEA] UniProtKB-KW:KW-0221) /// 0007275 // multicellular organismal development (GO_REF:0000037 [IEA] UniProtKB-KW:KW-0217) /// 0007283 // spermatogenesis (GO_REF:0000037 [IEA] UniProtKB-KW:KW-0744)	36128		Cation channel sperm-associated protein subunit gamma	CTSRG_HUMAN|CATSPERG|C19orf15	protein	taxon:9606	20130119	UniProtKB			0.0815087	0.592713	1	1	3724	42	44	3	3	1	0	0	2	2
CCL11	0.336972	0.336972	0.336972	2.54033	4.43978	4.43978	4.43978	3.79087	4.43978e-06	3.79087	1.60822	0.107788	1	1	4.43978e-06	3.79087	1.60822	0.107788	1	1	UniProtKB	P51671	CCL11		0007010 // cytoskeleton organization (PMID:10072545 [IDA]) /// 0007165 // signal transduction (PMID:10706854 [TAS]) /// 0006954 // inflammatory response (GO_REF:0000037 [IEA] UniProtKB-KW:KW-0395) /// 0006935 // chemotaxis (PMID:10706854 [TAS]) /// 0006468 // protein amino acid phosphorylation (PMID:10706854 [TAS]) /// 0032855 // positive regulation of Rac GTPase activity (PMID:19525930 [IDA]) //…	0005615 // extracellular space (GO_REF:0000037 [IEA] UniProtKB-KW:KW-0202) /// 0005576 // extracellular region (Reactome:REACT_21265 [TAS]) /// 0005576 // extracellular region (PMID:20041150 [IDA])	0008009 // chemokine activity (PMID:10072545 [IDA])	Eotaxin	CCL11_HUMAN|SCYA11|CCL11	protein	taxon:9606	20091106	BHF-UCL			0.218766	1.59082	1	1	925	2	2	2	2	1	0	0	1	1
CD27	0.118068	0.118068	0.118068	2.54033	1.55561	1.55561	1.55561	3.79087	1.55561e-06	3.79087	0.951947	0.341124	1	1	1.55561e-06	3.79087	0.951947	0.341124	1	1	UniProtKB	P26842	CD27		0043154 // negative regulation of caspase activity (PMID:12324477 [IDA]) /// 0007166 // cell surface receptor linked signal transduction (PMID:14556986 [NAS]) /// 0045471 // response to ethanol (GO_REF:0000019 [IEA] Ensembl:ENSRNOP00000029803) /// 0043066 // negative regulation of apoptosis (PMID:12324477 [IDA]) /// 0008588 // release of cytoplasmic sequestered NF-kappaB (PMID:12324477 [NAS]) ///…	0005576 // extracellular region (PMID:12624711 [NAS]) /// 0009897 // external side of plasma membrane (GO_REF:0000019 [IEA] Ensembl:ENSMUSP00000032486) /// 0005887 // integral to plasma membrane (PMID:12324477 [NAS])	0005515 // protein binding (PMID:9177220 [IPI] UniProtKB:O15304) /// 0005515 // protein binding (PMID:16683188 [IPI] UniProtKB:O15304-1) /// 0043027 // caspase inhibitor activity (PMID:12324477 [IDA]) /// 0004888 // transmembrane receptor activity (PMID:14556986 [NAS]) /// 0005515 // protein binding (PMID:12324477 [IPI] UniProtKB:P32970) /// 0005515 // protein binding (PMID:16683188 [IPI] UniProt…	CD27 antigen	CD27_HUMAN|CD27|TNFRSF7	protein	taxon:9606	20031111	UniProtKB			0.0766511	0.55739	1	1	1320	2	16	1	1	1	0	0	0	0
CEACAM19	0.138656	0.138656	0.138656	2.54033	1.82687	1.82687	1.82687	3.79087	1.82687e-06	3.79087	1.03161	0.302254	1	1	1.82687e-06	3.79087	1.03161	0.302254	1	1	UniProtKB	Q7Z692	CEACAM19			0016021 // integral to membrane (GO_REF:0000037 [IEA] UniProtKB-KW:KW-0812)		Carcinoembryonic antigen-related cell adhesion molecule 19	CEA19_HUMAN|CEAL1|UNQ2973/PRO7436|CEACAM19	protein	taxon:9606	20130119	UniProtKB			0.0900173	0.654586	2	0	2248	13	13	2	2	1	0	0	1	1
CLIC6	0.0410131	0.0410131	0.0410131	2.54033	0.540368	0.540368	0.540368	3.79087	5.40368e-07	3.79087	0.561058	0.574758	1	1	5.40368e-07	3.79087	0.561058	0.574758	1	1	UniProtKB	Q96NY7	CLIC6			0034707 // chloride channel complex (GO_REF:0000037 [IEA] UniProtKB-KW:KW-0869) /// 0005886 // plasma membrane (GO_REF:0000039 [IEA] UniProtKB-SubCell:SL-0039) /// 0005737 // cytoplasm (GO_REF:0000039 [IEA] UniProtKB-SubCell:SL-0086)	0031751 // D4 dopamine receptor binding (GO_REF:0000019 [IEA] Ensembl:ENSRNOP00000033206) /// 0031749 // D2 dopamine receptor binding (GO_REF:0000019 [IEA] Ensembl:ENSRNOP00000033206) /// 0031750 // D3 dopamine receptor binding (GO_REF:0000019 [IEA] Ensembl:ENSRNOP00000033206) /// 0008022 // protein C-terminus binding (GO_REF:0000019 [IEA] Ensembl:ENSRNOP00000033206) /// 0005247 // voltage-gated …	Chloride intracellular channel protein 6	CLIC6_HUMAN|CLIC1L|CLIC6	protein	taxon:9606	20130119	InterPro			0.0266262	0.19362	1	1	3800	42	47	1	1	1	0	0	0	0
CRTAC1	0.101663	0.101663	0.101663	2.54033	1.33946	1.33946	1.33946	3.79087	1.33946e-06	3.79087	0.883342	0.377052	1	1	1.33946e-06	3.79087	0.883342	0.377052	1	1	UniProtKB	Q9NQ79	CRTAC1			0005578 // proteinaceous extracellular matrix (GO_REF:0000039 [IEA] UniProtKB-SubCell:SL-0111)	0005509 // calcium ion binding (GO_REF:0000002 [IEA] InterPro:IPR001881|InterPro:IPR018097)	Cartilage acidic protein 1	CRAC1_HUMAN|ASPIC1|CRTAC1|CEP68	protein	taxon:9606	20130119	InterPro			0.0660009	0.479945	2	0	3066	112	121	2	2	1	0	0	2	2
CYLC1	0.0774986	0.0774986	0.0774986	2.54033	1.02108	1.02108	1.02108	3.79087	1.02108e-06	3.79087	0.771247	0.44056	1	1	1.02108e-06	3.79087	0.771247	0.44056	1	1	UniProtKB	P35663	CYLC1		0030154 // cell differentiation (GO_REF:0000037 [IEA] UniProtKB-KW:KW-0221) /// 0007283 // spermatogenesis (PMID:8354692 [NAS]) /// 0007275 // multicellular organismal development (GO_REF:0000037 [IEA] UniProtKB-KW:KW-0217)	0043159 // acrosomal matrix (PMID:8354692 [IDA]) /// 0033150 // cytoskeletal calyx (GO_REF:0000039 [IEA] UniProtKB-SubCell:SL-0032) /// 0005856 // cytoskeleton (GO_REF:0000029 [NAS])	0005198 // structural molecule activity (PMID:8354692 [NAS]) /// 0005200 // structural constituent of cytoskeleton (GO_REF:0000002 [IEA] InterPro:IPR026189)	Cylicin-1	CYLC1_HUMAN|CYLC1|CYL|CYL1	protein	taxon:9606	20010830	UniProtKB			0.050313	0.365865	1	1	2011	6	6	1	1	1	1	1	0	0
CYP2S1	0.118924	0.118924	0.118924	2.54033	1.56688	1.56688	1.56688	3.79087	1.56688e-06	3.79087	0.955391	0.33938	1	1	1.56688e-06	3.79087	0.955392	0.33938	1	1	UniProtKB	B4DJI0, Q96SQ9	CYP2S1		0006805 // xenobiotic metabolic process (Reactome:REACT_13433 [TAS]) /// 0044281 /// 0055114 // oxidation reduction (GO_REF:0000029 [NAS]) /// 0006805 // xenobiotic metabolic process (Reactome:REACT_13705 [TAS])	0005783 // endoplasmic reticulum (GO_REF:0000029 [NAS]) /// 0005789 // endoplasmic reticulum membrane (Reactome:REACT_13626 [TAS])	0020037 // heme binding (GO_REF:0000002 [IEA] InterPro:IPR001128|InterPro:IPR002401) /// 0004497 // monooxygenase activity (GO_REF:0000038 [IEA] UniProtKB-KW:KW-0503) /// 0005506 // iron ion binding (GO_REF:0000002 [IEA] InterPro:IPR001128|InterPro:IPR002401|InterPro:IPR008067) /// 0004497 // monooxygenase activity (GO_REF:0000029 [NAS]) /// 0070330 // aromatase activity (GO_REF:0000003 [IEA] EC:…	cDNA FLJ52866, highly similar to Cytochrome P450 2S1 (EC 1.14.14.1)	B4DJI0_HUMAN|CYP2S1	protein	taxon:9606	20130119	UniProtKB			0.0772067	0.561431	1	0	2621	10	10	2	2	1	0	0	2	2
DBC1	0.048764	0.048764	0.048764	2.54033	0.642491	0.642491	0.642491	3.79087	6.42491e-07	3.79087	0.611781	0.540682	1	1	6.42491e-07	3.79087	0.611781	0.540682	1	1	UniProtKB	O60477	DBC1		0045786 // negative regulation of cell cycle (PMID:11420708 [IDA]) /// 0008219 // cell death (PMID:14712213 [IDA]) /// 0007050 // cell cycle arrest (GO_REF:0000037 [IEA] UniProtKB-KW:KW-0338)	0005737 // cytoplasm (PMID:11420708 [IDA]) /// 0015630 // microtubule cytoskeleton (PMID:18029348 [IDA])	0005515 // protein binding (PMID:12442002 [IPI] UniProtKB:Q92484) /// 0005515 // protein binding (PMID:22446626 [IPI] UniProtKB:Q5BKZ1)	Deleted in bladder cancer protein 1	DBC1_HUMAN|IB3089A|DBCCR1|DBC1|FAM5A	protein	taxon:9606	20040311	UniProtKB			0.0316581	0.230211	1	1	3196	111	122	1	1	1	0	0	0	0
FAM117A	0.06601	0.06601	0.06601	2.54033	0.869716	0.869716	0.869716	3.79087	8.69716e-07	3.79087	0.71179	0.476595	1	1	8.69716e-07	3.79087	0.71179	0.476595	1	1																0.0428545	0.311629	1	1	2361	71	78	1	1	1	0	0	0	0
FAM155B	0.0387782	0.0387782	0.0387782	2.54033	0.510923	0.510923	0.510923	3.79087	5.10923e-07	3.79087	0.545558	0.58537	1	1	5.10923e-07	3.79087	0.545558	0.58537	1	1	UniProtKB	O75949	FAM155B			0016021 // integral to membrane (GO_REF:0000037 [IEA] UniProtKB-KW:KW-0812)		Transmembrane protein FAM155B	F155B_HUMAN|TED|FAM155B|TMEM28	protein	taxon:9606	20130119	UniProtKB			0.0251753	0.183069	1	1	4019	16	16	1	1	1	0	0	0	0
FAM26F	0.140532	0.140532	0.140532	2.54033	1.85158	1.85158	1.85158	3.79087	1.85158e-06	3.79087	1.03857	0.299007	1	1	1.85158e-06	3.79087	1.03857	0.299007	1	1	UniProtKB	Q5R3K3	FAM26F			0016021 // integral to membrane (GO_REF:0000037 [IEA] UniProtKB-KW:KW-0812)		Protein FAM26F	FA26F_HUMAN|C6orf187|FAM26F	protein	taxon:9606	20130119	UniProtKB			0.0912348	0.66344	1	1	1109	5	6	1	1	1	0	0	0	0
FBXL7	0.0341626	0.0341626	0.0341626	2.54033	0.45011	0.45011	0.45011	3.79087	4.5011e-07	3.79087	0.512061	0.608608	1	1	4.5011e-07	3.79087	0.512061	0.608608	1	1	UniProtKB	Q9UJT9, D6RDY7	FBXL7		0031146 // SCF-dependent proteasomal ubiquitin-dependent protein catabolic process (GO_REF:0000019 [IEA] Ensembl:ENSMUSP00000061305) /// 0008283 // cell proliferation (GO_REF:0000019 [IEA] Ensembl:ENSMUSP00000061305) /// 0000086 // G2/M transition of mitotic cell cycle (GO_REF:0000024 [ISS] UniProtKB:Q5BJ29) /// 0006511 // ubiquitin-dependent protein catabolic process (PMID:10531035 [NAS]) /// 00…	0005813 // centrosome (GO_REF:0000024 [ISS] UniProtKB:Q5BJ29) /// 0005813 // centrosome (GO_REF:0000019 [IEA] Ensembl:ENSMUSP00000061305) /// 0005737 // cytoplasm (GO_REF:0000037 [IEA] UniProtKB-KW:KW-0963) /// 0000151 // ubiquitin ligase complex (PMID:10531035 [NAS]) /// 0019005 // SCF ubiquitin ligase complex (GO_REF:0000019 [IEA] Ensembl:ENSMUSP00000061305) /// 0019005 // SCF ubiquitin ligase …	0004842 // ubiquitin-protein ligase activity (PMID:10531035 [NAS])	F-box/LRR-repeat protein 7	D6RDY7_HUMAN|FBXL7	protein	taxon:9606	20130119	ENSEMBL			0.0221787	0.161279	1	1	4562	274	300	1	1	1	0	0	0	0
GBP4	0.025362	0.025362	0.025362	2.54033	0.334158	0.334158	0.334158	3.79087	3.34158e-07	3.79087	0.441203	0.659066	1	1	3.34158e-07	3.79087	0.441203	0.659066	1	1	UniProtKB	Q96PP9	GBP4			0005634 // nucleus (GO_REF:0000039 [IEA] UniProtKB-SubCell:SL-0191) /// 0005737 // cytoplasm (GO_REF:0000039 [IEA] UniProtKB-SubCell:SL-0086)	0005525 // GTP binding (GO_REF:0000037 [IEA] UniProtKB-KW:KW-0342) /// 0003924 // GTPase activity (GO_REF:0000002 [IEA] InterPro:IPR003191|InterPro:IPR015894)	Guanylate-binding protein 4	GBP4_HUMAN|GBP4	protein	taxon:9606	20130119	InterPro			0.0164653	0.119732	1	1	6145	4	5	1	1	1	0	0	0	0
GPR132	0.0428629	0.0428629	0.0428629	2.54033	0.564741	0.564741	0.564741	3.79087	5.64741e-07	3.79087	0.573572	0.566258	1	1	5.64741e-07	3.79087	0.573572	0.566258	1	1	UniProtKB	Q9UNW8	GPR132		0000082 // G1/S transition of mitotic cell cycle (GO_REF:0000019 [IEA] Ensembl:ENSMUSP00000021729) /// 0006950 // response to stress (GO_REF:0000037 [IEA] UniProtKB-KW:KW-0346)	0005886 // plasma membrane (Reactome:REACT_15291 [TAS]) /// 0005886 // plasma membrane (Reactome:REACT_21323 [TAS]) /// 0016021 // integral to membrane (GO_REF:0000037 [IEA] UniProtKB-KW:KW-0812) /// 0005886 // plasma membrane (Reactome:REACT_22263 [TAS]) /// 0005886 // plasma membrane (Reactome:REACT_22436 [TAS])	0004930 // G-protein coupled receptor activity (GO_REF:0000037 [IEA] UniProtKB-KW:KW-0297)	Probable G-protein coupled receptor 132	GP132_HUMAN|GPR132|G2A	protein	taxon:9606	20130119	ENSEMBL			0.0278271	0.202353	1	1	3636	14	14	1	1	1	0	0	0	0
GSPT2 (NT_011638 1462307..1465155)	0.0547225	0.0547225	0.0547225	2.54033	0.720997	0.720997	0.720997	3.79087	7.20997e-07	3.79087	0.648082	0.516932	1	1	7.20997e-07	3.79087	0.648082	0.516932	1	1																0.0355265	0.258341	1	1	2848	0	1	0	1	0	0	0	0	0
INSM1	0.05509	0.05509	0.05509	2.54033	0.725839	0.725839	0.725839	3.79087	7.25839e-07	3.79087	0.650254	0.515528	1	1	7.25839e-07	3.79087	0.650254	0.515528	1	1	UniProtKB	Q01101	INSM1		0006355 // regulation of transcription, DNA-dependent (GO_REF:0000037 [IEA] UniProtKB-KW:KW-0805) /// 0031018 // endocrine pancreas development (Reactome:REACT_13698 [TAS]) /// 0006351 // transcription, DNA-dependent (GO_REF:0000037 [IEA] UniProtKB-KW:KW-0804) /// 0031018 // endocrine pancreas development (Reactome:REACT_13650 [TAS]) /// 0003323	0005654 // nucleoplasm (Reactome:REACT_13811 [TAS])	0046872 // metal ion binding (GO_REF:0000037 [IEA] UniProtKB-KW:KW-0479) /// 0003677 // DNA binding (GO_REF:0000037 [IEA] UniProtKB-KW:KW-0238) /// 0008270 // zinc ion binding (GO_REF:0000002 [IEA] InterPro:IPR007087|InterPro:IPR015880)	Insulinoma-associated protein 1	INSM1_HUMAN|IA1|INSM1	protein	taxon:9606	20130119	ENSEMBL			0.0357651	0.260076	1	1	2829	1	1	1	1	1	0	0	0	0
KRT78	0.0876545	0.0876545	0.0876545	2.54033	1.15489	1.15489	1.15489	3.79087	1.15489e-06	3.79087	0.820227	0.412087	1	1	1.15489e-06	3.79087	0.820227	0.412087	1	1	UniProtKB	Q8N1N4, F8VS93	KRT78			0045095 // keratin filament (GO_REF:0000002 [IEA] InterPro:IPR003054)	0005198 // structural molecule activity (GO_REF:0000002 [IEA] InterPro:IPR001664)	Keratin, type II cytoskeletal 78	F8VS93_HUMAN|KRT78	protein	taxon:9606	20130119	InterPro			0.0569063	0.41381	1	1	1778	2	2	1	1	1	0	0	0	0
LGI1	0.0658705	0.0658705	0.0658705	2.54033	0.867878	0.867878	0.867878	3.79087	8.67878e-07	3.79087	0.711037	0.477061	1	1	8.67878e-07	3.79087	0.711037	0.477061	1	1	UniProtKB	O95970	LGI1	NOT	0050806 // positive regulation of synaptic transmission (GO_REF:0000024 [ISS] UniProtKB:Q8K4Y5) /// 0008283 // cell proliferation (PMID:9879993 [TAS]) /// 0051260 // protein homooligomerization (GO_REF:0000019 [IEA] Ensembl:ENSRNOP00000020411) /// 0030307 // positive regulation of cell growth (PMID:20463223 [IMP]) /// 0007411 // axon guidance (PMID:20463223 [IMP]) /// 0031175 // neuron projection…	0005615 // extracellular space (PMID:17067999 [IDA]) /// 0045202 // synapse (GO_REF:0000039 [IEA] UniProtKB-SubCell:SL-0258) /// 0030054 // cell junction (GO_REF:0000037 [IEA] UniProtKB-KW:KW-0965) /// 0005576 // extracellular region (GO_REF:0000039 [IEA] UniProtKB-SubCell:SL-0243)	0005515 // protein binding (PMID:20463223 [IPI] UniProtKB:Q9BZR6) /// 0005102 // receptor binding (PMID:20463223 [IPI] UniProtKB:Q86UN2) /// 0005515 // protein binding (PMID:20463223 [IPI] UniProtKB:Q9P0K1) /// 0005102 // receptor binding (PMID:20463223 [IPI] UniProtKB:Q9BZR6) /// 0005515 // protein binding (PMID:20463223 [IPI] UniProtKB:O75077) /// 0005102 // receptor binding (PMID:20463223 [IPI…	Leucine-rich glioma-inactivated protein 1	LGI1_HUMAN|EPT|UNQ775/PRO1569|LGI1	protein	taxon:9606	20101116	DFLAT			0.0427639	0.31097	1	0	2366	26	26	1	1	1	0	0	1	1
LOC729461	0.101996	0.101996	0.101996	2.54033	1.34385	1.34385	1.34385	3.79087	1.34385e-06	3.79087	0.884786	0.376272	1	1	1.34385e-06	3.79087	0.884786	0.376272	1	1																0.0662169	0.481515	1	1	1528	5	9	0	1	0	0	0	0	0
MEI1	0.0389041	0.0389041	0.0389041	2.54033	0.512581	0.512581	0.512581	3.79087	5.12581e-07	3.79087	0.546442	0.584762	1	1	5.12581e-07	3.79087	0.546442	0.584762	1	1	UniProtKB	Q5TIA1	MEI1		0007286 // spermatid development (GO_REF:0000019 [IEA] Ensembl:ENSMUSP00000086582) /// 0007141 // male meiosis I (GO_REF:0000019 [IEA] Ensembl:ENSMUSP00000086582)			Meiosis inhibitor protein 1	MEI1_HUMAN|MEI1	protein	taxon:9606	20130119	ENSEMBL			0.025257	0.183663	1	1	4006	95	106	0	1	0	0	0	0	0
MURC	0.0592134	0.0592134	0.0592134	2.54033	0.780167	0.780167	0.780167	3.79087	7.80167e-07	3.79087	0.67415	0.500216	1	1	7.80167e-07	3.79087	0.67415	0.500216	1	1	UniProtKB	Q5BKX8	MURC		0030154 // cell differentiation (GO_REF:0000037 [IEA] UniProtKB-KW:KW-0221) /// 0006351 // transcription, DNA-dependent (GO_REF:0000037 [IEA] UniProtKB-KW:KW-0804) /// 0007517 // muscle organ development (GO_REF:0000037 [IEA] UniProtKB-KW:KW-0517) /// 0045944 // positive regulation of transcription from RNA polymerase II promoter (GO_REF:0000019 [IEA] Ensembl:ENSMUSP00000030033)	0030018 // Z disc (GO_REF:0000019 [IEA] Ensembl:ENSMUSP00000030033)		Muscle-related coiled-coil protein	MURC_HUMAN|MURC	protein	taxon:9606	20130119	UniProtKB			0.038442	0.279542	1	1	2632	37	38	1	1	1	0	0	0	0
MXRA5	0.0159111	0.0159111	0.0159111	2.54033	0.209638	0.209638	0.209638	3.79087	2.09638e-07	3.79087	0.34946	0.726744	1	1	2.09638e-07	3.79087	0.34946	0.726744	1	1	UniProtKB	Q9NR99	MXRA5			0005576 // extracellular region (GO_REF:0000039 [IEA] UniProtKB-SubCell:SL-0243)		Matrix-remodeling-associated protein 5	MXRA5_HUMAN|MXRA5	protein	taxon:9606	20130119	UniProtKB			0.0103297	0.0751154	1	1	9795	31	32	1	1	1	0	0	0	0
MYH2	0.0253373	0.0253373	0.0253373	2.54033	0.333832	0.333832	0.333832	3.79087	3.33832e-07	3.79087	0.440988	0.659222	1	1	3.33832e-07	3.79087	0.440988	0.659222	1	1	UniProtKB	C9JIX4, Q9UKX2, J3QLR0, E7EX84, E9PJ22, Q567P6	MYH2		0014823 // response to activity (GO_REF:0000019 [IEA] Ensembl:ENSMUSP00000129544) /// 0006936 // muscle contraction (PMID:10388558 [TAS]) /// 0030049 // muscle filament sliding (PMID:3904738 [NAS]) /// 0006936 // muscle contraction (PMID:8145163 [IDA]) /// 0001778 // plasma membrane repair (GO_REF:0000019 [IEA] Ensembl:ENSMUSP00000129544)	0016459 // myosin complex (GO_REF:0000038 [IEA] UniProtKB-KW:KW-0518) /// 0005634 // nucleus (PMID:18029348 [IDA]) /// 0030016 // myofibril (PMID:8145163 [IDA]) /// 0030017 // sarcomere (PMID:3904738 [NAS]) /// 0005794 // Golgi apparatus (GO_REF:0000019 [IEA] Ensembl:ENSMUSP00000129544) /// 0043234 // protein complex (PMID:11256614 [IDA]) /// 0005925 // focal adhesion (PMID:18029348 [IDA]) /// 00…	0008307 // structural constituent of muscle (PMID:3904738 [NAS]) /// 0005524 // ATP binding (GO_REF:0000002 [IEA] InterPro:IPR001609) /// 0005524 // ATP binding (GO_REF:0000002 [IEA] InterPro:IPR001609|InterPro:IPR004009) /// 0003779 // actin binding (GO_REF:0000029 [NAS]) /// 0000146 // microfilament motor activity (PMID:10388558 [TAS]) /// 0005524 // ATP binding (GO_REF:0000038 [IEA] UniProtKB-…	Myosin-2	C9JIX4_HUMAN|MYH2	protein	taxon:9606	20130119	ENSEMBL			0.0164493	0.119616	2	0	6151	12	12	1	1	1	0	0	0	0
NDUFA3 (NW_003571055 77272..81394)	0.880507	0.880507	0.880507	2.54033	11.6011	11.6011	11.6011	3.79087	1.16011e-05	3.79087	2.59965	0.00933186	0.30979	1	1.16011e-05	3.79087	2.59966	0.00933184	0.309789	1																0.571635	4.15681	1	1	354	1	2	1	2	0.5	1	1	0	1
NDUFA3 (NW_003571058 77272..81394)	0.440253	0.440253	0.440253	2.54033	5.80056	5.80056	5.80056	3.79087	5.80056e-06	3.79087	1.83823	0.0660291	1	1	5.80056e-06	3.79087	1.83823	0.066029	1	1																0.285818	2.0784	1	1	354	1	1	1	1	1	1	1	0	0
NEK10	0.118113	0.118113	0.118113	2.54033	1.5562	1.5562	1.5562	3.79087	1.5562e-06	3.79087	0.952127	0.341032	1	1	1.5562e-06	3.79087	0.952128	0.341032	1	1	UniProtKB	H7C3L8, Q8N774, Q6ZWH5, H7C000	NEK10				0005524 // ATP binding (GO_REF:0000037 [IEA] UniProtKB-KW:KW-0067) /// 0046872 // metal ion binding (GO_REF:0000037 [IEA] UniProtKB-KW:KW-0479) /// 0005524 // ATP binding (GO_REF:0000002 [IEA] InterPro:IPR000719) /// 0004713 // protein tyrosine kinase activity (GO_REF:0000002 [IEA] InterPro:IPR008266) /// 0004674 // protein serine/threonine kinase activity (GO_REF:0000037 [IEA] UniProtKB-KW:KW-07…	Serine/threonine-protein kinase Nek10	H7C000_HUMAN|NEK10	protein	taxon:9606	20130119	InterPro			0.0766801	0.557601	1	0	2639	131	141	2	2	1	0	0	2	2
NKD2	0.0752897	0.0752897	0.0752897	2.54033	0.991981	0.991981	0.991981	3.79087	9.91981e-07	3.79087	0.760177	0.447149	1	1	9.91981e-07	3.79087	0.760177	0.447149	1	1	UniProtKB	Q969F2	NKD2		0032436 // positive regulation of proteasomal ubiquitin-dependent protein catabolic process (PMID:20177058 [IMP]) /// 0048210 // Golgi vesicle fusion to target membrane (PMID:17553928 [IMP]) /// 0072661 /// 0006887 // exocytosis (GO_REF:0000037 [IEA] UniProtKB-KW:KW-0268) /// 0090090 /// 0010954 // positive regulation of protein maturation by peptide bond cleavage (PMID:15064403 [IDA]) /// 009000…	0016023 // cytoplasmic membrane-bounded vesicle (GO_REF:0000039 [IEA] UniProtKB-SubCell:SL-0088) /// 0031410 // cytoplasmic vesicle (PMID:15064403 [IDA]) /// 0016328 // lateral plasma membrane (PMID:20177058 [IDA]) /// 0016323 // basolateral plasma membrane (PMID:17553928 [IDA]) /// 0071944	0005515 // protein binding (PMID:20177058 [IPI] UniProtKB:O14640) /// 0005515 // protein binding (PMID:15687260 [IPI] UniProtKB:Q06190-2) /// 0005515 // protein binding (PMID:21988832 [IPI] UniProtKB:Q96PM5) /// 0019838 // growth factor binding (PMID:15064403 [IPI] UniProtKB:P01135) /// 0031625 // ubiquitin protein ligase binding (PMID:18757723 [IPI] UniProtKB:Q9QZR0) /// 0005509 // calcium ion b…	Protein naked cuticle homolog 2	NKD2_HUMAN|NKD2	protein	taxon:9606	20130119	InterPro			0.0488789	0.355437	2	0	2070	16	17	1	1	1	0	0	0	0
OLFML2B	0.147959	0.147959	0.147959	2.54033	1.94943	1.94943	1.94943	3.79087	1.94943e-06	3.79087	1.06566	0.286579	1	1	1.94943e-06	3.79087	1.06566	0.286579	1	1	UniProtKB	Q68BL8, H0YE85, H0YEW8	OLFML2B		0030198 // extracellular matrix organization (GO_REF:0000019 [IEA] Ensembl:ENSMUSP00000047291)	0005576 // extracellular region (GO_REF:0000039 [IEA] UniProtKB-SubCell:SL-0243) /// 0031012 // extracellular matrix (GO_REF:0000019 [IEA] Ensembl:ENSMUSP00000047291)	0050840 // extracellular matrix binding (GO_REF:0000019 [IEA] Ensembl:ENSMUSP00000047291)	Olfactomedin-like protein 2B	H0YE85_HUMAN|OLFML2B	protein	taxon:9606	20130119	ENSEMBL			0.0960564	0.698502	1	1	3160	11	13	3	3	1	0	0	0	0
PIK3CG	0.0289737	0.0289737	0.0289737	2.54033	0.381744	0.381744	0.381744	3.79087	3.81744e-07	3.79087	0.471573	0.637232	1	1	3.81744e-07	3.79087	0.471573	0.637232	1	1	UniProtKB	P48736, E9PDN7	PIK3CG		0010818 // T cell chemotaxis (PMID:18278175 [TAS]) /// 0072672 /// 0044281 /// 0002407 // dendritic cell chemotaxis (PMID:18278175 [TAS]) /// 0006897 // endocytosis (GO_REF:0000037 [IEA] UniProtKB-KW:KW-0254) /// 0051897 // positive regulation of protein kinase B signaling cascade (PMID:12507995 [IDA]) /// 0035747 /// 0002675 // positive regulation of acute inflammatory response (GO_REF:0000019 […	0005829 // cytosol (Reactome:REACT_121297 [TAS]) /// 0005944 // 1-phosphatidylinositol-4-phosphate 3-kinase, class IB complex (PMID:12507995 [IDA]) /// 0005886 // plasma membrane (GO_REF:0000039 [IEA] UniProtKB-SubCell:SL-0039) /// 0005829 // cytosol (Reactome:REACT_19289 [TAS]) /// 0005829 // cytosol (Reactome:REACT_20608 [TAS]) /// 0016020 // membrane (PMID:12507995 [IDA]) /// 0005829 // cytoso…	0005515 // protein binding (PMID:12507995 [IPI] UniProtKB:O02696) /// 0004672 // protein kinase activity (PMID:19376709 [TAS]) /// 0046934 // phosphatidylinositol-4,5-bisphosphate 3-kinase activity (GO_REF:0000003 [IEA] EC:2.7.1.153) /// 0035004 // phosphoinositide 3-kinase activity (PMID:17290298 [TAS]) /// 0005524 // ATP binding (GO_REF:0000037 [IEA] UniProtKB-KW:KW-0067) /// 0016773 // phospho…	Phosphatidylinositol 4,5-bisphosphate 3-kinase catalytic subunit gamma isoform	E9PDN7_HUMAN|PIK3CG	protein	taxon:9606	20130119	ENSEMBL			0.0188101	0.136783	1	1	5379	21	21	1	1	1	0	0	0	0
PLA2G7	0.0785929	0.0785929	0.0785929	2.54033	1.0355	1.0355	1.0355	3.79087	1.0355e-06	3.79087	0.776673	0.437352	1	1	1.0355e-06	3.79087	0.776673	0.437352	1	1	UniProtKB	B4DLM5, Q13093, F5GYY6	PLA2G7		0016042 // lipid catabolic process (GO_REF:0000002 [IEA] InterPro:IPR005065) /// 0090026 // positive regulation of monocyte chemotaxis (PMID:8624782 [IDA]) /// 0034374 // low-density lipoprotein particle remodeling (PMID:8624782 [IDA]) /// 0050729 // positive regulation of inflammatory response (PMID:8624782 [TAS]) /// 0034440 // lipid oxidation (PMID:8624782 [IDA]) /// 0034441 // plasma lipoprot…	0034362 // low-density lipoprotein particle (PMID:8624782 [IDA]) /// 0005576 // extracellular region (Reactome:REACT_19294 [TAS])	0047499 // calcium-independent phospholipase A2 activity (PMID:8624782 [IDA]) /// 0003847 // 1-alkyl-2-acetylglycerophosphocholine esterase activity (GO_REF:0000002 [IEA] InterPro:IPR005065) /// 0003847 // 1-alkyl-2-acetylglycerophosphocholine esterase activity (GO_REF:0000003 [IEA] EC:3.1.1.47) /// 0005543 // phospholipid binding (PMID:8624782 [IDA])	Platelet-activating factor acetylhydrolase	B4DLM5_HUMAN|PLA2G7	protein	taxon:9606	20130119	InterPro			0.0510234	0.371031	2	0	1983	8	8	1	1	1	0	0	0	0
PLCD4	0.0962926	0.0962926	0.0962926	2.54033	1.26871	1.26871	1.26871	3.79087	1.26871e-06	3.79087	0.859693	0.389958	1	1	1.26871e-06	3.79087	0.859693	0.389958	1	1	UniProtKB	C9JAE4, H7C237, H7C281, Q9BRC7, C9JEA7	PLCD4		0006629 // lipid metabolic process (GO_REF:0000002 [IEA] InterPro:IPR001192|InterPro:IPR001711|InterPro:IPR017946) /// 0035556 /// 0006629 // lipid metabolic process (GO_REF:0000002 [IEA] InterPro:IPR001192|InterPro:IPR017946) /// 0007340 // acrosome reaction (GO_REF:0000019 [IEA] Ensembl:ENSMUSP00000027362) /// 0016042 // lipid catabolic process (GO_REF:0000037 [IEA] UniProtKB-KW:KW-0442) /// 00…	0005622 // intracellular (GO_REF:0000019 [IEA] Ensembl:ENSMUSP00000027362) /// 0005622 // intracellular (GO_REF:0000002 [IEA] InterPro:IPR001192) /// 0005622 // intracellular (GO_REF:0000002 [IEA] InterPro:IPR001192|InterPro:IPR001711) /// 0005634 // nucleus (GO_REF:0000039 [IEA] UniProtKB-SubCell:SL-0191) /// 0016020 // membrane (GO_REF:0000039 [IEA] UniProtKB-SubCell:SL-0162) /// 0005783 // end…	0005509 // calcium ion binding (GO_REF:0000002 [IEA] InterPro:IPR002048|InterPro:IPR011992) /// 0004871 // signal transducer activity (GO_REF:0000038 [IEA] UniProtKB-KW:KW-0807) /// 0004871 // signal transducer activity (GO_REF:0000037 [IEA] UniProtKB-KW:KW-0807) /// 0004435 // phosphoinositide phospholipase C activity (GO_REF:0000003 [IEA] EC:3.1.4.11) /// 0004435 // phosphoinositide phospholipa…	1-phosphatidylinositol 4,5-bisphosphate phosphodiesterase delta-4	C9JAE4_HUMAN|PLCD4	protein	taxon:9606	20130119	InterPro			0.0625143	0.454591	1	1	3237	32	34	2	2	1	0	0	0	0
PLG	0.03694	0.03694	0.03694	2.54033	0.486703	0.486703	0.486703	3.79087	4.86703e-07	3.79087	0.53247	0.594401	1	1	4.86703e-07	3.79087	0.53247	0.594401	1	1	UniProtKB	Q5TEH5, P00747	PLG		0006917 // induction of apoptosis (GO_REF:0000019 [IEA] Ensembl:ENSMUSP00000014578) /// 0042246 // tissue regeneration (GO_REF:0000019 [IEA] Ensembl:ENSMUSP00000014578) /// 0071674 /// 0060707 // trophoblast giant cell differentiation (GO_REF:0000019 [IEA] Ensembl:ENSMUSP00000014578) /// 0006915 // apoptosis (GO_REF:0000019 [IEA] Ensembl:ENSMUSP00000014578) /// 0010812 // negative regulation of c…	0005886 // plasma membrane (Reactome:REACT_739 [TAS]) /// 0005576 // extracellular region (Reactome:REACT_15393 [TAS]) /// 0005576 // extracellular region (Reactome:REACT_739 [TAS]) /// 0005576 // extracellular region (Reactome:REACT_118634 [TAS]) /// 0005615 // extracellular space (PMID:6216475 [IDA]) /// 0005576 // extracellular region (Reactome:REACT_221 [TAS]) /// 0005576 // extracellular reg…	0005515 // protein binding (PMID:6438154 [IPI] UniProtKB:P07996) /// 0019904 // protein domain specific binding (PMID:9786936 [IPI] UniProtKB:P05452) /// 0005515 // protein binding (PMID:16319056 [IPI] UniProtKB:Q6V4L5) /// 0005515 // protein binding (PMID:16319056 [IPI] UniProtKB:Q6V4L9) /// 0005515 // protein binding (PMID:19712047 [IPI] UniProtKB:P04196) /// 0034185 // apolipoprotein binding (…	Plasminogen	PLMN_HUMAN|PLG	protein	taxon:9606	20120601	Reactome			0.0239818	0.174391	2	0	4219	28	29	1	1	1	0	0	1	1
PSORS1C1 (NT_007592 31022607..31047869)	0.171641	0.171641	0.171641	2.54033	2.26145	2.26145	2.26145	3.79087	2.26145e-06	3.79087	1.14778	0.251061	1	1	2.26145e-06	3.79087	1.14778	0.251061	1	1																0.111431	0.810303	1	1	908	2	17	0	1	0	0	0	0	0
PSORS1C1 (NT_113891 2597311..2622591)	0.171641	0.171641	0.171641	2.54033	2.26145	2.26145	2.26145	3.79087	2.26145e-06	3.79087	1.14778	0.251061	1	1	2.26145e-06	3.79087	1.14778	0.251061	1	1																0.111431	0.810303	1	1	908	1	6	0	1	0	0	0	0	0
PTPLAD2	0.220127	0.220127	0.220127	2.54033	2.90028	2.90028	2.90028	3.79087	2.90028e-06	3.79087	1.29982	0.193662	1	1	2.90028e-06	3.79087	1.29982	0.193662	1	1	UniProtKB	Q5VWC8	PTPLAD2		0006633 // fatty acid biosynthetic process (GO_REF:0000037 [IEA] UniProtKB-KW:KW-0275)	0005789 // endoplasmic reticulum membrane (GO_REF:0000039 [IEA] UniProtKB-SubCell:SL-0097) /// 0016021 // integral to membrane (GO_REF:0000037 [IEA] UniProtKB-KW:KW-0812)	0016829 // lyase activity (GO_REF:0000037 [IEA] UniProtKB-KW:KW-0456)	Very-long-chain (3R)-3-hydroxyacyl-[acyl-carrier protein] dehydratase 4	HACD4_HUMAN|HACD4|PTPLAD2	protein	taxon:9606	20130119	UniProtKB			0.142909	1.0392	1	1	1416	40	42	2	2	1	0	0	1	1
RCSD1	0.260531	0.260531	0.260531	2.54033	3.43263	3.43263	3.43263	3.79087	3.43263e-06	3.79087	1.41409	0.157336	1	1	3.43263e-06	3.79087	1.41409	0.157336	1	1	UniProtKB	Q6JBY9	RCSD1		0071474 /// 0003009 // skeletal muscle contraction (GO_REF:0000024 [ISS] UniProtKB:F1LW80)	0005884 // actin filament (PMID:15850461 [IC] GO:0051015)	0051015 // actin filament binding (PMID:15850461 [IPI] UniProtKB:P47757) /// 0051015 // actin filament binding (PMID:15850461 [IPI] UniProtKB:P47754)	CapZ-interacting protein	CPZIP_HUMAN|CAPZIP|RCSD1	protein	taxon:9606	20120123	BHF-UCL			0.16914	1.22995	1	1	2991	35	41	5	5	1	0	0	0	0
SGCG	0.094169	0.094169	0.094169	2.54033	1.24072	1.24072	1.24072	3.79087	1.24072e-06	3.79087	0.85016	0.395236	1	1	1.24072e-06	3.79087	0.85016	0.395236	1	1	UniProtKB	Q13326	SGCG		0007517 // muscle organ development (PMID:8641426 [TAS]) /// 0007010 // cytoskeleton organization (GO_REF:0000002 [IEA] InterPro:IPR006875)	0042383 // sarcolemma (GO_REF:0000039 [IEA] UniProtKB-SubCell:SL-0238) /// 0005886 // plasma membrane (PMID:8641426 [TAS]) /// 0005737 // cytoplasm (GO_REF:0000037 [IEA] UniProtKB-KW:KW-0963) /// 0016021 // integral to membrane (GO_REF:0000037 [IEA] UniProtKB-KW:KW-0812) /// 0016012 // sarcoglycan complex (GO_REF:0000019 [IEA] Ensembl:ENSMUSP00000077106) /// 0005856 // cytoskeleton (GO_REF:000003…		Gamma-sarcoglycan	SGCG_HUMAN|SGCG	protein	taxon:9606	20130119	UniProtKB			0.0611356	0.444565	1	0	1655	98	113	1	1	1	0	0	1	1
SPATA16	0.0739676	0.0739676	0.0739676	2.54033	0.974561	0.974561	0.974561	3.79087	9.74561e-07	3.79087	0.753473	0.451166	1	1	9.74561e-07	3.79087	0.753473	0.451166	1	1	UniProtKB	Q9BXB7	SPATA16		0030154 // cell differentiation (GO_REF:0000037 [IEA] UniProtKB-KW:KW-0221) /// 0007275 // multicellular organismal development (GO_REF:0000037 [IEA] UniProtKB-KW:KW-0217) /// 0007283 // spermatogenesis (GO_REF:0000037 [IEA] UniProtKB-KW:KW-0744)	0005794 // Golgi apparatus (GO_REF:0000039 [IEA] UniProtKB-SubCell:SL-0132)		Spermatogenesis-associated protein 16	SPT16_HUMAN|SPATA16	protein	taxon:9606	20130119	UniProtKB			0.0480206	0.349196	1	0	2107	139	153	1	1	1	0	0	1	1
TAS2R45	0.346333	0.346333	0.346333	2.54033	4.56311	4.56311	4.56311	3.79087	4.56311e-06	3.79087	1.6304	0.103017	1	1	4.56311e-06	3.79087	1.6304	0.103017	1	1	UniProtKB	P59539	TAS2R45		0050909 // sensory perception of taste (GO_REF:0000037 [IEA] UniProtKB-KW:KW-0919)	0016021 // integral to membrane (GO_REF:0000037 [IEA] UniProtKB-KW:KW-0812)	0004930 // G-protein coupled receptor activity (GO_REF:0000037 [IEA] UniProtKB-KW:KW-0297)	Taste receptor type 2 member 45	T2R45_HUMAN|GPR59|TAS2R45	protein	taxon:9606	20130119	UniProtKB			0.224843	1.63501	1	1	900	0	2	0	2	0	0	0	0	0
TLR3	0.0512495	0.0512495	0.0512495	2.54033	0.675238	0.675238	0.675238	3.79087	6.75238e-07	3.79087	0.627179	0.530542	1	1	6.75238e-07	3.79087	0.627179	0.530542	1	1	UniProtKB	E9PGH4, O15455	TLR3		0032728 // positive regulation of interferon-beta production (GO_REF:0000019 [IEA] Ensembl:ENSMUSP00000034056) /// 0006954 // inflammatory response (GO_REF:0000037 [IEA] UniProtKB-KW:KW-0395) /// 0032760 // positive regulation of tumor necrosis factor production (GO_REF:0000019 [IEA] Ensembl:ENSMUSP00000034056) /// 0045359 // positive regulation of interferon-beta biosynthetic process (PMID:12054…	0000139 // Golgi membrane (Reactome:REACT_118791 [TAS]) /// 0010008 // endosome membrane (Reactome:REACT_25318 [TAS]) /// 0010008 // endosome membrane (Reactome:REACT_6713 [TAS]) /// 0016021 // integral to membrane (GO_REF:0000038 [IEA] UniProtKB-KW:KW-0812) /// 0005622 // intracellular (GO_REF:0000019 [IEA] Ensembl:ENSRNOP00000036680) /// 0010008 // endosome membrane (Reactome:REACT_6884 [TAS]) …	0004888 // transmembrane receptor activity (PMID:12054664 [NAS]) /// 0003725 // double-stranded RNA binding (PMID:16111635 [IDA]) /// 0004872 // receptor activity (GO_REF:0000019 [IEA] Ensembl:ENSRNOP00000036680) /// 0003725 // double-stranded RNA binding (PMID:12054664 [NAS]) /// 0003725 // double-stranded RNA binding (GO_REF:0000019 [IEA] Ensembl:ENSRNOP00000036680) /// 0004872 // receptor acti…	Toll-like receptor 3	E9PGH4_HUMAN|TLR3	protein	taxon:9606	20130119	ENSEMBL			0.0332718	0.241945	1	0	3041	10	10	1	1	1	0	0	1	1
TNXB (NT_167245 3288147..3356325)	0.0111905	0.0111905	0.0111905	2.54033	0.14744	0.14744	0.14744	3.79087	1.4744e-07	3.79087	0.29307	0.769469	1	1	1.4744e-07	3.79087	0.29307	0.769469	1	1																0.00726498	0.0528294	2	0	13927	0	8	0	1	0	0	1	0	0
TRIM58	0.0302151	0.0302151	0.0302151	2.54033	0.3981	0.3981	0.3981	3.79087	3.981e-07	3.79087	0.481569	0.630112	1	1	3.981e-07	3.79087	0.481569	0.630112	1	1	UniProtKB	Q8NG06	TRIM58			0005622 // intracellular (GO_REF:0000002 [IEA] InterPro:IPR000315)	0046872 // metal ion binding (GO_REF:0000037 [IEA] UniProtKB-KW:KW-0479) /// 0008270 // zinc ion binding (GO_REF:0000002 [IEA] InterPro:IPR000315|InterPro:IPR001841)	Tripartite motif-containing protein 58	TRI58_HUMAN|TRIM58	protein	taxon:9606	20130119	InterPro			0.019616	0.142643	1	1	5158	8	8	1	1	1	0	0	0	0
TTC9	0.0298734	0.0298734	0.0298734	2.54033	0.393598	0.393598	0.393598	3.79087	3.93598e-07	3.79087	0.478839	0.632053	1	1	3.93598e-07	3.79087	0.478839	0.632054	1	1																0.0193942	0.14103	1	1	5217	17	18	1	1	1	0	0	0	0
ZNF311 (NT_167244 266034..276479)	0.0577649	0.0577649	0.0577649	2.54033	0.761082	0.761082	0.761082	3.79087	7.61082e-07	3.79087	0.665853	0.505505	1	1	7.61082e-07	3.79087	0.665854	0.505505	1	1																0.0375016	0.272704	1	1	2698	0	2	0	1	0	0	0	0	0
ACRC	0.196161	0.196161	0.196161	2.54033	2.58452	2.58452	2.58452	3.79087	2.58452e-06	3.79087	1.22702	0.219814	1	1	2.58452e-06	3.79087	1.22702	0.219814	1	1	UniProtKB	Q96QF7	ACRC			0005634 // nucleus (GO_REF:0000039 [IEA] UniProtKB-SubCell:SL-0191)		Acidic repeat-containing protein	ACRC_HUMAN|ACRC	protein	taxon:9606	20130119	UniProtKB			0.12735	0.92606	1	1	3178	41	43	4	4	1	0	0	0	0
ACSM4	0.0894146	0.0894146	0.0894146	2.54033	1.17808	1.17808	1.17808	3.79087	1.17808e-06	3.79087	0.828421	0.407432	1	1	1.17808e-06	3.79087	0.828421	0.407432	1	1	UniProtKB	P0C7M7	ACSM4		0006637 // acyl-CoA metabolic process (GO_REF:0000019 [IEA] Ensembl:ENSRNOP00000031354) /// 0006631 // fatty acid metabolic process (GO_REF:0000037 [IEA] UniProtKB-KW:KW-0276)	0005759 // mitochondrial matrix (GO_REF:0000039 [IEA] UniProtKB-SubCell:SL-0170)	0047760 // butyrate-CoA ligase activity (GO_REF:0000003 [IEA] EC:6.2.1.2) /// 0005524 // ATP binding (GO_REF:0000037 [IEA] UniProtKB-KW:KW-0067) /// 0046872 // metal ion binding (GO_REF:0000037 [IEA] UniProtKB-KW:KW-0479) /// 0004321 // fatty-acyl-CoA synthase activity (GO_REF:0000019 [IEA] Ensembl:ENSRNOP00000031354)	Acyl-coenzyme A synthetase ACSM4, mitochondrial	ACSM4_HUMAN|ACSM4	protein	taxon:9606	20130119	ENSEMBL			0.058049	0.42212	1	0	1743	12	12	1	1	1	0	0	1	1
ADCK5 (NT_037704 165142..185869)	0.317251	0.317251	0.317251	2.54033	4.17995	4.17995	4.17995	3.79087	4.17995e-06	3.79087	1.56045	0.118654	1	1	4.17995e-06	3.79087	1.56045	0.118654	1	1																0.205963	1.49772	1	1	1965	4	18	0	4	0	0	1	0	1
ADCYAP1R1	0.0237034	0.0237034	0.0237034	2.54033	0.312304	0.312304	0.312304	3.79087	3.12304e-07	3.79087	0.426532	0.66972	1	1	3.12304e-07	3.79087	0.426532	0.66972	1	1	UniProtKB	P41586, H0Y813, E9PFU5, C9JVH3	ADCYAP1R1		0030154 // cell differentiation (GO_REF:0000037 [IEA] UniProtKB-KW:KW-0221) /// 0007169 // transmembrane receptor protein tyrosine kinase signaling pathway (Reactome:REACT_11064 [TAS]) /// 0060548 // negative regulation of cell death (GO_REF:0000019 [IEA] Ensembl:ENSRNOP00000016175) /// 0046545 // development of primary female sexual characteristics (GO_REF:0000019 [IEA] Ensembl:ENSRNOP0000001617…	0005886 // plasma membrane (GO_REF:0000040 [IEA] UniProtKB-SubCell:SL-0039) /// 0005886 // plasma membrane (Reactome:REACT_17008 [TAS]) /// 0005923 // tight junction (GO_REF:0000019 [IEA] Ensembl:ENSRNOP00000016175) /// 0005886 // plasma membrane (Reactome:REACT_22268 [TAS]) /// 0005791 // rough endoplasmic reticulum (GO_REF:0000019 [IEA] Ensembl:ENSRNOP00000016175) /// 0009986 // cell surface (G…	0008179 // adenylate cyclase binding (GO_REF:0000019 [IEA] Ensembl:ENSRNOP00000016175) /// 0001634 // pituitary adenylate cyclase-activating polypeptide receptor activity (GO_REF:0000019 [IEA] Ensembl:ENSRNOP00000016175) /// 0042923 // neuropeptide binding (GO_REF:0000019 [IEA] Ensembl:ENSRNOP00000016175) /// 0030306 // ADP-ribosylation factor binding (GO_REF:0000019 [IEA] Ensembl:ENSRNOP00000016…	Pituitary adenylate cyclase-activating polypeptide type I receptor	C9JVH3_HUMAN|ADCYAP1R1	protein	taxon:9606	20130119	ENSEMBL			0.0153885	0.111902	4	0	6575	21	23	1	1	1	0	0	0	0
AGAP10 (NW_003871068 608338..629829)	0.151017	0.151017	0.151017	2.54033	1.98973	1.98973	1.98973	3.79087	1.98973e-06	3.79087	1.07661	0.281653	1	1	1.98973e-06	3.79087	1.07661	0.281653	1	1																0.0980421	0.712941	1	1	2064	5	14	0	2	0	0	2	0	0
AGXT2	0.0647754	0.0647754	0.0647754	2.54033	0.85345	0.85345	0.85345	3.79087	8.5345e-07	3.79087	0.705102	0.480747	1	1	8.5345e-07	3.79087	0.705102	0.480747	1	1	UniProtKB	E9PDL7, Q9BYV1	AGXT2		0009436 // glyoxylate catabolic process (PMID:20018850 [IDA]) /// 0019481 // L-alanine catabolic process, by transamination (PMID:20018850 [IDA]) /// 0055086 // nucleobase, nucleoside and nucleotide metabolic process (Reactome:REACT_1698 [TAS]) /// 0006206 // pyrimidine base metabolic process (Reactome:REACT_957 [TAS]) /// 0045429 // positive regulation of nitric oxide biosynthetic process (PMID:…	0005759 // mitochondrial matrix (Reactome:REACT_25087 [TAS]) /// 0005739 // mitochondrion (PMID:20018850 [IDA])	0008453 // alanine-glyoxylate transaminase activity (Reactome:REACT_25087 [TAS]) /// 0008453 // alanine-glyoxylate transaminase activity (PMID:20018850 [IDA]) /// 0030170 // pyridoxal phosphate binding (GO_REF:0000002 [IEA] InterPro:IPR005814|InterPro:IPR015421|InterPro:IPR015422) /// 0047305 // (R)-3-amino-2-methylpropionate-pyruvate transaminase activity (GO_REF:0000003 [IEA] EC:2.6.1.40) /// 0…	Alanine--glyoxylate aminotransferase 2, mitochondrial	E9PDL7_HUMAN|AGXT2	protein	taxon:9606	20130119	InterPro			0.042053	0.3058	1	1	2406	26	29	1	1	1	0	0	0	0
ATP10A	0.0297707	0.0297707	0.0297707	2.54033	0.392244	0.392244	0.392244	3.79087	3.92244e-07	3.79087	0.478015	0.63264	1	1	3.92244e-07	3.79087	0.478015	0.63264	1	1	UniProtKB	H0YJI4, O60312, G3V261	ATP10A		0008360 // regulation of cell shape (PMID:11353404 [NAS]) /// 0006812 // cation transport (GO_REF:0000002 [IEA] InterPro:IPR001757) /// 0045332 // phospholipid translocation (PMID:21914794 [NAS]) /// 0034220 // ion transmembrane transport (Reactome:REACT_25149 [TAS]) /// 0055085 // transmembrane transport (Reactome:REACT_15518 [TAS]) /// 0034220 // ion transmembrane transport (Reactome:REACT_2530…	0005783 // endoplasmic reticulum (PMID:21914794 [IDA]) /// 0016021 // integral to membrane (PMID:11353404 [NAS]) /// 0005886 // plasma membrane (Reactome:REACT_115892 [TAS]) /// 0005789 // endoplasmic reticulum membrane (GO_REF:0000039 [IEA] UniProtKB-SubCell:SL-0097) /// 0016021 // integral to membrane (GO_REF:0000038 [IEA] UniProtKB-KW:KW-0812) /// 0005886 // plasma membrane (Reactome:REACT_249…	0015662 // ATPase activity, coupled to transmembrane movement of ions, phosphorylative mechanism (GO_REF:0000002 [IEA] InterPro:IPR001757) /// 0005524 // ATP binding (GO_REF:0000037 [IEA] UniProtKB-KW:KW-0067) /// 0004012 // phospholipid-translocating ATPase activity (GO_REF:0000002 [IEA] InterPro:IPR006539) /// 0005524 // ATP binding (GO_REF:0000038 [IEA] UniProtKB-KW:KW-0067) /// 0005524 // ATP…	Probable phospholipid-transporting ATPase VA	G3V261_HUMAN|ATP10A	protein	taxon:9606	20130119	InterPro			0.0193275	0.140545	1	0	5235	169	177	1	1	1	0	0	1	1
BAI3	0.0276476	0.0276476	0.0276476	2.54033	0.364272	0.364272	0.364272	3.79087	3.64272e-07	3.79087	0.460655	0.645046	1	1	3.64272e-07	3.79087	0.460655	0.645046	1	1	UniProtKB	O60242, J3KMY8, B7Z1K0	BAI3		0007218 // neuropeptide signaling pathway (GO_REF:0000002 [IEA] InterPro:IPR000203) /// 0007186 // G-protein coupled receptor protein signaling pathway (PMID:15203201 [TAS]) /// 0016525 // negative regulation of angiogenesis (GO_REF:0000002 [IEA] InterPro:IPR008077)	0005886 // plasma membrane (GO_REF:0000038 [IEA] UniProtKB-KW:KW-1003) /// 0005886 // plasma membrane (GO_REF:0000039 [IEA] UniProtKB-SubCell:SL-0039) /// 0016021 // integral to membrane (GO_REF:0000037 [IEA] UniProtKB-KW:KW-0812) /// 0016021 // integral to membrane (GO_REF:0000038 [IEA] UniProtKB-KW:KW-0812) /// 0016021 // integral to membrane (GO_REF:0000002 [IEA] InterPro:IPR000832)	0004930 // G-protein coupled receptor activity (GO_REF:0000037 [IEA] UniProtKB-KW:KW-0297) /// 0004930 // G-protein coupled receptor activity (GO_REF:0000002 [IEA] InterPro:IPR000832|InterPro:IPR017983)	Brain-specific angiogenesis inhibitor 3	B7Z1K0_HUMAN|BAI3	protein	taxon:9606	20130119	InterPro			0.0179492	0.130522	1	1	5637	479	542	1	1	1	0	0	0	0
C20orf152	0.0808768	0.0808768	0.0808768	2.54033	1.06559	1.06559	1.06559	3.79087	1.06559e-06	3.79087	0.787878	0.430768	1	1	1.06559e-06	3.79087	0.787878	0.430768	1	1																0.0525062	0.381814	2	0	1927	54	58	1	1	1	0	0	0	0
C4orf32	0.686059	0.686059	0.686059	2.54033	9.03918	9.03918	9.03918	3.79087	9.03918e-06	3.79087	2.29472	0.0217494	0.54076	1	9.03918e-06	3.79087	2.29472	0.0217494	0.540759	1	UniProtKB	Q8N8J7	C4orf32			0016021 // integral to membrane (GO_REF:0000037 [IEA] UniProtKB-KW:KW-0812)		Uncharacterized protein C4orf32	CD032_HUMAN|C4orf32	protein	taxon:9606	20130119	UniProtKB			0.445397	3.23883	1	1	2726	100	105	12	12	1	1	1	0	0
C9orf50	0.0962035	0.0962035	0.0962035	2.54033	1.26753	1.26753	1.26753	3.79087	1.26753e-06	3.79087	0.859295	0.390178	1	1	1.26753e-06	3.79087	0.859295	0.390178	1	1																0.0624564	0.45417	1	1	1620	4	4	1	1	1	0	0	0	0
CA13	0.0404279	0.0404279	0.0404279	2.54033	0.532659	0.532659	0.532659	3.79087	5.32659e-07	3.79087	0.557041	0.577499	1	1	5.32659e-07	3.79087	0.557041	0.577499	1	1	UniProtKB	Q8N1Q1	CA13		0006730 // one-carbon metabolic process (GO_REF:0000002 [IEA] InterPro:IPR018338) /// 0044281 /// 0015701 // bicarbonate transport (Reactome:REACT_121123 [TAS])	0005829 // cytosol (Reactome:REACT_120951 [TAS]) /// 0005829 // cytosol (Reactome:REACT_120719 [TAS])	0046872 // metal ion binding (GO_REF:0000037 [IEA] UniProtKB-KW:KW-0479) /// 0008270 // zinc ion binding (GO_REF:0000002 [IEA] InterPro:IPR018338) /// 0004089 // carbonate dehydratase activity (GO_REF:0000003 [IEA] EC:4.2.1.1)	Carbonic anhydrase 13	CAH13_HUMAN|CA13	protein	taxon:9606	20130119	UniProtKB			0.0262463	0.190857	1	1	3855	31	33	1	1	1	0	0	0	0
CACNG4	0.0454372	0.0454372	0.0454372	2.54033	0.598659	0.598659	0.598659	3.79087	5.98659e-07	3.79087	0.590544	0.554826	1	1	5.98659e-07	3.79087	0.590544	0.554826	1	1	UniProtKB	Q9UBN1	CACNG4		0006810 // transport (PMID:10613843 [TAS]) /// 2000311 /// 0051899 // membrane depolarization (Reactome:REACT_13606 [TAS]) /// 0007268 // synaptic transmission (Reactome:REACT_13685 [TAS]) /// 0007268 // synaptic transmission (Reactome:REACT_13477 [TAS])	0005886 // plasma membrane (Reactome:REACT_18393 [TAS]) /// 0005891 // voltage-gated calcium channel complex (GO_REF:0000002 [IEA] InterPro:IPR005423) /// 0030666 // endocytic vesicle membrane (Reactome:REACT_18393 [TAS]) /// 0005887 // integral to plasma membrane (PMID:10613843 [TAS]) /// 0032281 // alpha-amino-3-hydroxy-5-methyl-4-isoxazolepropionic acid selective glutamate receptor complex (GO…	0005245 // voltage-gated calcium channel activity (GO_REF:0000002 [IEA] InterPro:IPR005423)	Voltage-dependent calcium channel gamma-4 subunit	CCG4_HUMAN|CACNG4	protein	taxon:9606	20130119	InterPro			0.0294984	0.214506	1	1	3430	82	84	1	1	1	0	0	0	0
CCDC175	0.0597125	0.0597125	0.0597125	2.54033	0.786743	0.786743	0.786743	3.79087	7.86743e-07	3.79087	0.676986	0.498415	1	1	7.86743e-07	3.79087	0.676986	0.498415	1	1																0.0387661	0.281898	1	1	2610	78	89	0	1	0	0	0	0	0
CCDC36	0.0507985	0.0507985	0.0507985	2.54033	0.669296	0.669296	0.669296	3.79087	6.69296e-07	3.79087	0.624413	0.532356	1	1	6.69296e-07	3.79087	0.624413	0.532356	1	1																0.0329789	0.239816	2	0	3068	72	82	1	1	1	0	0	1	1
CELA2B	0.168851	0.168851	0.168851	2.54033	2.2247	2.2247	2.2247	3.79087	2.2247e-06	3.79087	1.13841	0.254949	1	1	2.2247e-06	3.79087	1.13841	0.254949	1	1	UniProtKB	P08218	CELA2B		0006508 // proteolysis (GO_REF:0000037 [IEA] UniProtKB-KW:KW-0645)	0005576 // extracellular region (GO_REF:0000039 [IEA] UniProtKB-SubCell:SL-0243)	0004252 // serine-type endopeptidase activity (GO_REF:0000002 [IEA] InterPro:IPR001254|InterPro:IPR001314|InterPro:IPR018114)	Chymotrypsin-like elastase family member 2B	CEL2B_HUMAN|CELA2B|ELA2B	protein	taxon:9606	20130119	InterPro			0.10962	0.797134	1	1	923	19	19	1	1	1	0	0	0	0
CRISPLD1	0.0720026	0.0720026	0.0720026	2.54033	0.948672	0.948672	0.948672	3.79087	9.48672e-07	3.79087	0.743397	0.457241	1	1	9.48672e-07	3.79087	0.743397	0.457241	1	1	UniProtKB	B7Z8V9, Q9H336	CRISPLD1			0005576 // extracellular region (GO_REF:0000039 [IEA] UniProtKB-SubCell:SL-0243) /// 0005576 // extracellular region (GO_REF:0000002 [IEA] InterPro:IPR018244)		cDNA FLJ57290, highly similar to Homo sapiens cysteine-rich secretory protein LCCL domain containing 1 (CRISPLD1), mRNA	B7Z8V9_HUMAN|CRISPLD1	protein	taxon:9606	20130119	InterPro			0.0467449	0.339919	1	1	4329	33	36	2	2	1	1	1	1	1
CYP3A7	0.0749998	0.0749998	0.0749998	2.54033	0.988162	0.988162	0.988162	3.79087	9.88162e-07	3.79087	0.758712	0.448025	1	1	9.88162e-07	3.79087	0.758712	0.448025	1	1	UniProtKB	P24462	CYP3A7		0006805 // xenobiotic metabolic process (Reactome:REACT_13433 [TAS]) /// 0044281 /// 0006805 // xenobiotic metabolic process (Reactome:REACT_13705 [TAS])	0005789 // endoplasmic reticulum membrane (Reactome:REACT_13670 [TAS])	0020037 // heme binding (GO_REF:0000002 [IEA] InterPro:IPR001128|InterPro:IPR002402|InterPro:IPR008072) /// 0019825 // oxygen binding (PMID:2722762 [TAS]) /// 0070330 // aromatase activity (GO_REF:0000003 [IEA] EC:1.14.14.1) /// 0009055 // electron carrier activity (GO_REF:0000002 [IEA] InterPro:IPR001128) /// 0005506 // iron ion binding (GO_REF:0000002 [IEA] InterPro:IPR001128|InterPro:IPR002402…	Cytochrome P450 3A7	CP3A7_HUMAN|CYP3A7	protein	taxon:9606	20041006	UniProtKB			0.0486908	0.354069	1	0	2078	0	5	0	1	0	0	0	0	1
CYP7B1	0.0650729	0.0650729	0.0650729	2.54033	0.857369	0.857369	0.857369	3.79087	8.57369e-07	3.79087	0.706719	0.479741	1	1	8.57369e-07	3.79087	0.706719	0.479741	1	1	UniProtKB	O75881	CYP7B1		0051591 // response to cAMP (GO_REF:0000019 [IEA] Ensembl:ENSRNOP00000013116) /// 0006699 // bile acid biosynthetic process (Reactome:REACT_11048 [TAS]) /// 0060740 // prostate gland epithelium morphogenesis (GO_REF:0000019 [IEA] Ensembl:ENSMUSP00000037487) /// 0008203 // cholesterol metabolic process (GO_REF:0000037 [IEA] UniProtKB-KW:KW-0153) /// 0006699 // bile acid biosynthetic process (React…	0005789 // endoplasmic reticulum membrane (Reactome:REACT_9950 [TAS]) /// 0005789 // endoplasmic reticulum membrane (Reactome:REACT_9994 [TAS])	0020037 // heme binding (GO_REF:0000002 [IEA] InterPro:IPR001128|InterPro:IPR002403) /// 0009055 // electron carrier activity (GO_REF:0000002 [IEA] InterPro:IPR001128) /// 0005506 // iron ion binding (GO_REF:0000002 [IEA] InterPro:IPR001128|InterPro:IPR002403) /// 0033783 // 25-hydroxycholesterol 7alpha-hydroxylase activity (GO_REF:0000003 [IEA] EC:1.14.13.100) /// 0008396 // oxysterol 7-alpha-hy…	25-hydroxycholesterol 7-alpha-hydroxylase	CP7B1_HUMAN|CYP7B1	protein	taxon:9606	20130119	InterPro			0.0422461	0.307205	1	1	2395	190	230	1	1	1	0	0	0	0
DUOX2	0.0245587	0.0245587	0.0245587	2.54033	0.323574	0.323574	0.323574	3.79087	3.23574e-07	3.79087	0.43416	0.664172	1	1	3.23574e-07	3.79087	0.43416	0.664173	1	1	UniProtKB	Q9NRD8	DUOX2		0006590 // thyroid hormone generation (GO_REF:0000041 [IEA] UniPathway:UPA00194) /// 0009615 // response to virus (PMID:16111680 [IDA]) /// 0042446 // hormone biosynthetic process (GO_REF:0000037 [IEA] UniProtKB-KW:KW-0893) /// 0019221 // cytokine-mediated signaling pathway (GO_REF:0000024 [ISS] UniProtKB:Q9NRD9) /// 0009566 // fertilization (GO_REF:0000019 [IEA] Ensembl:ENSMUSP00000050314) /// 0…	0016324 // apical plasma membrane (GO_REF:0000039 [IEA] UniProtKB-SubCell:SL-0015) /// 0016021 // integral to membrane (GO_REF:0000037 [IEA] UniProtKB-KW:KW-0812)	0016174 // NAD(P)H oxidase activity (PMID:15972824 [IDA]) /// 0020037 // heme binding (GO_REF:0000002 [IEA] InterPro:IPR002007|InterPro:IPR010255|InterPro:IPR019791) /// 0004601 // peroxidase activity (GO_REF:0000037 [IEA] UniProtKB-KW:KW-0575) /// 0005509 // calcium ion binding (PMID:15972824 [IDA])	Dual oxidase 2	DUOX2_HUMAN|DUOX2|LNOX2|THOX2	protein	taxon:9606	20130119	UniProtKB			0.0159438	0.11594	1	0	6346	13	13	1	1	1	0	0	1	1
ENDOU	0.0633535	0.0633535	0.0633535	2.54033	0.834715	0.834715	0.834715	3.79087	8.34715e-07	3.79087	0.69732	0.485603	1	1	8.34715e-07	3.79087	0.69732	0.485603	1	1	UniProtKB	B7Z7N4, P21128	ENDOU		0007565 // female pregnancy (PMID:2350438 [IEP]) /// 0006508 // proteolysis (PMID:2350438 [IDA]) /// 0006955 // immune response (GO_REF:0000002 [IEA] InterPro:IPR001212|InterPro:IPR020436)	0005737 // cytoplasm (PMID:6755403 [IDA]) /// 0005576 // extracellular region (PMID:1710108 [TAS]) /// 0005886 // plasma membrane (PMID:1710108 [TAS]) /// 0005737 // cytoplasm (PMID:2350438 [TAS]) /// 0005615 // extracellular space (PMID:2350438 [TAS])	0008236 // serine-type peptidase activity (PMID:2350438 [IDA]) /// 0004521 // endoribonuclease activity (PMID:18936097 [IDA]) /// 0008236 // serine-type peptidase activity (PMID:18936097 [IDA]) /// 0030247 // polysaccharide binding (GO_REF:0000002 [IEA] InterPro:IPR001212|InterPro:IPR020436) /// 0016788 // hydrolase activity, acting on ester bonds (GO_REF:0000002 [IEA] InterPro:IPR018998) /// 003…	cDNA FLJ56948, moderately similar to Placental protein 11 (EC 3.4.21.-)	B7Z7N4_HUMAN|ENDOU	protein	taxon:9606	20130119	InterPro			0.0411298	0.299087	3	0	2460	13	13	1	1	1	0	0	0	0
ERC2	0.0507819	0.0507819	0.0507819	2.54033	0.669078	0.669078	0.669078	3.79087	6.69078e-07	3.79087	0.624311	0.532423	1	1	6.69078e-07	3.79087	0.624311	0.532423	1	1	UniProtKB	O15083	ERC2			0042734 // presynaptic membrane (GO_REF:0000024 [ISS] UniProtKB:Q8K3M6) /// 0030054 // cell junction (GO_REF:0000037 [IEA] UniProtKB-KW:KW-0965) /// 0005856 // cytoskeleton (GO_REF:0000039 [IEA] UniProtKB-SubCell:SL-0090) /// 0030426 // growth cone (GO_REF:0000024 [ISS] UniProtKB:Q8K3M6) /// 0005737 // cytoplasm (GO_REF:0000039 [IEA] UniProtKB-SubCell:SL-0086)	0005515 // protein binding (PMID:12923177 [IPI] UniProtKB:Q13136) /// 0005515 // protein binding (PMID:12923177 [IPI] UniProtKB:O75334) /// 0005515 // protein binding (PMID:20195357 [IPI] UniProtKB:P10242) /// 0005515 // protein binding (PMID:12923177 [IPI] UniProtKB:O75145) /// 0005515 // protein binding (PMID:12923177 [IPI] UniProtKB:O75335)	ERC protein 2	ERC2_HUMAN|ERC2|KIAA0378	protein	taxon:9606	20051018	UniProtKB			0.0329682	0.239738	1	1	6138	699	810	2	2	1	0	0	0	0
ESPN	0.0441375	0.0441375	0.0441375	2.54033	0.581535	0.581535	0.581535	3.79087	5.81535e-07	3.79087	0.582037	0.560542	1	1	5.81535e-07	3.79087	0.582037	0.560542	1	1	UniProtKB	B1AK53	ESPN		0051494 // negative regulation of cytoskeleton organization (GO_REF:0000019 [IEA] Ensembl:ENSMUSP00000030785) /// 0030046 // parallel actin filament bundle formation (GO_REF:0000019 [IEA] Ensembl:ENSMUSP00000030785) /// 0007626 // locomotory behavior (GO_REF:0000019 [IEA] Ensembl:ENSMUSP00000030785) /// 0007605 // sensory perception of sound (GO_REF:0000037 [IEA] UniProtKB-KW:KW-1009)	0032420 // stereocilium (GO_REF:0000039 [IEA] UniProtKB-SubCell:SL-0302) /// 0005737 // cytoplasm (GO_REF:0000037 [IEA] UniProtKB-KW:KW-0963) /// 0031941 // filamentous actin (PMID:8799813 [ISS] UniProtKB:Q63618) /// 0005903 // brush border (PMID:9763424 [ISS] UniProtKB:Q63618)	0051015 // actin filament binding (PMID:8799813 [ISS] UniProtKB:Q63618) /// 0017124 // SH3 domain binding (PMID:12598619 [ISS] UniProtKB:Q63618)	Espin	ESPN_HUMAN|LP2654|DFNB36|ESPN	protein	taxon:9606	20130119	UniProtKB			0.0286546	0.20837	1	1	3531	26	28	0	1	0	0	0	0	0
EVC2	0.03038	0.03038	0.03038	2.54033	0.400273	0.400273	0.400273	3.79087	4.00273e-07	3.79087	0.482882	0.62918	1	1	4.00273e-07	3.79087	0.482882	0.62918	1	1	UniProtKB	Q86UK5, E9PFT2	EVC2		0007224 // smoothened signaling pathway (GO_REF:0000024 [ISS] UniProtKB:Q8K1G2) /// 0007224 // smoothened signaling pathway (GO_REF:0000002 [IEA] InterPro:IPR022076|InterPro:IPR026501)	0060170 // cilium membrane (GO_REF:0000039 [IEA] UniProtKB-SubCell:SL-0305) /// 0005929 // cilium (GO_REF:0000024 [ISS] UniProtKB:Q8K1G2) /// 0005634 // nucleus (GO_REF:0000024 [ISS] UniProtKB:Q8K1G2) /// 0005737 // cytoplasm (GO_REF:0000037 [IEA] UniProtKB-KW:KW-0963) /// 0016021 // integral to membrane (GO_REF:0000037 [IEA] UniProtKB-KW:KW-0812) /// 0005932 // microtubule basal body (GO_REF:000…		Limbin	E9PFT2_HUMAN|EVC2	protein	taxon:9606	20130119	InterPro			0.0197231	0.143422	2	0	5130	82	88	1	1	1	0	0	0	0
FAM123C	0.0722195	0.0722195	0.0722195	2.54033	0.951529	0.951529	0.951529	3.79087	9.51529e-07	3.79087	0.744516	0.456564	1	1	9.51529e-07	3.79087	0.744516	0.456564	1	1																0.0468857	0.340943	4	0	6474	9	9	3	3	1	0	0	0	0
FAM221B	0.0529021	0.0529021	0.0529021	2.54033	0.697013	0.697013	0.697013	3.79087	6.97013e-07	3.79087	0.637211	0.523987	1	1	6.97013e-07	3.79087	0.637211	0.523987	1	1																0.0343447	0.249747	1	1	2946	4	4	1	1	1	0	0	0	0
GABRA1	0.087213	0.087213	0.087213	2.54033	1.14908	1.14908	1.14908	3.79087	1.14908e-06	3.79087	0.818158	0.413267	1	1	1.14908e-06	3.79087	0.818159	0.413267	1	1	UniProtKB	E5RJS3, E5RHL6, P14867, E5RK60	GABRA1		0051932 // synaptic transmission, GABAergic (GO_REF:0000024 [ISS] UniProtKB:P62813) /// 0055085 // transmembrane transport (Reactome:REACT_15518 [TAS]) /// 0034220 // ion transmembrane transport (Reactome:REACT_25300 [TAS]) /// 0007214 // gamma-aminobutyric acid signaling pathway (GO_REF:0000002 [IEA] InterPro:IPR005431) /// 0007268 // synaptic transmission (Reactome:REACT_13685 [TAS]) /// 000681…	0034707 // chloride channel complex (GO_REF:0000037 [IEA] UniProtKB-KW:KW-0869) /// 0005887 // integral to plasma membrane (GO_REF:0000019 [IEA] Ensembl:ENSRNOP00000004725) /// 0045211 // postsynaptic membrane (GO_REF:0000039 [IEA] UniProtKB-SubCell:SL-0219) /// 0030054 // cell junction (GO_REF:0000037 [IEA] UniProtKB-KW:KW-0965) /// 0005887 // integral to plasma membrane (GO_REF:0000024 [ISS] Un…	0005230 // extracellular ligand-gated ion channel activity (GO_REF:0000002 [IEA] InterPro:IPR006202|InterPro:IPR018000) /// 0004890 // GABA-A receptor activity (GO_REF:0000002 [IEA] InterPro:IPR001390|InterPro:IPR005431) /// 0008144 // drug binding (GO_REF:0000024 [ISS] UniProtKB:P62813) /// 0004890 // GABA-A receptor activity (GO_REF:0000002 [IEA] InterPro:IPR001390) /// 0005254 // chloride chan…	Gamma-aminobutyric acid receptor subunit alpha-1	E5RHL6_HUMAN|GABRA1	protein	taxon:9606	20130119	InterPro			0.0566197	0.411726	7	0	5361	26	26	3	3	1	0	0	3	3
GADL1	0.0852802	0.0852802	0.0852802	2.54033	1.12361	1.12361	1.12361	3.79087	1.12361e-06	3.79087	0.809042	0.418491	1	1	1.12361e-06	3.79087	0.809042	0.418491	1	1	UniProtKB	Q6ZQY3	GADL1		0019752 // carboxylic acid metabolic process (GO_REF:0000002 [IEA] InterPro:IPR002129)		0030170 // pyridoxal phosphate binding (GO_REF:0000002 [IEA] InterPro:IPR002129|InterPro:IPR015421|InterPro:IPR015422) /// 0016831 // carboxy-lyase activity (GO_REF:0000037 [IEA] UniProtKB-KW:KW-0210)	Glutamate decarboxylase-like protein 1	GADL1_HUMAN|GADL1	protein	taxon:9606	20130119	InterPro			0.0553649	0.402602	1	1	3655	117	123	1	2	0.5	1	1	0	1
GALC	0.0374099	0.0374099	0.0374099	2.54033	0.492895	0.492895	0.492895	3.79087	4.92895e-07	3.79087	0.535846	0.592065	1	1	4.92895e-07	3.79087	0.535846	0.592065	1	1	UniProtKB	H0YJV6, P54803, G3V4M2, G3V255, E7EPA4, H0YJG8, G3V5E8, J3KN25	GALC		0006683 // galactosylceramide catabolic process (GO_REF:0000002 [IEA] InterPro:IPR001286) /// 0006687 // glycosphingolipid metabolic process (Reactome:REACT_116105 [TAS]) /// 0005975 // carbohydrate metabolic process (GO_REF:0000002 [IEA] InterPro:IPR013781) /// 0044281 /// 0006665 // sphingolipid metabolic process (Reactome:REACT_19323 [TAS]) /// 0006644 // phospholipid metabolic process (Reacto…	0005739 // mitochondrion (GO_REF:0000019 [IEA] Ensembl:ENSMUSP00000021390) /// 0005764 // lysosome (PMID:7601472 [TAS]) /// 0043202 // lysosomal lumen (Reactome:REACT_115737 [TAS])	0004336 // galactosylceramidase activity (GO_REF:0000002 [IEA] InterPro:IPR001286) /// 0004336 // galactosylceramidase activity (GO_REF:0000003 [IEA] EC:3.2.1.46) /// 0043169 // cation binding (GO_REF:0000002 [IEA] InterPro:IPR013781)	Galactocerebrosidase	E7EPA4_HUMAN|GALC	protein	taxon:9606	20130119	InterPro			0.0242869	0.176609	3	0	4166	26	33	1	1	1	0	0	0	0
GAPT	0.0703293	0.0703293	0.0703293	2.54033	0.926624	0.926624	0.926624	3.79087	9.26624e-07	3.79087	0.734708	0.462517	1	1	9.26624e-07	3.79087	0.734708	0.462517	1	1	UniProtKB	Q8N292, D6RBK7, D6RA63	GAPT		0042113 // B cell activation (GO_REF:0000037 [IEA] UniProtKB-KW:KW-0075)	0005886 // plasma membrane (GO_REF:0000039 [IEA] UniProtKB-SubCell:SL-0039) /// 0016021 // integral to membrane (GO_REF:0000037 [IEA] UniProtKB-KW:KW-0812) /// 0016021 // integral to membrane (GO_REF:0000002 [IEA] InterPro:IPR021082)		Protein GAPT	D6RA63_HUMAN|GAPT	protein	taxon:9606	20130119	InterPro			0.0456586	0.332019	1	1	2216	1	1	1	1	1	0	0	0	0
GDNF	0.114009	0.114009	0.114009	2.54033	1.50212	1.50212	1.50212	3.79087	1.50212e-06	3.79087	0.935439	0.349562	1	1	1.50212e-06	3.79087	0.935439	0.349562	1	1	UniProtKB	P39905	GDNF		0007399 // nervous system development (PMID:8637574 [TAS]) /// 0051584 // regulation of dopamine uptake (PMID:8493557 [IDA]) /// 0030432 // peristalsis (GO_REF:0000024 [ISS] UniProtKB:P48540) /// 0001755 // neural crest cell migration (PMID:15242795 [IDA]) /// 0048485 // sympathetic nervous system development (GO_REF:0000024 [ISS] UniProtKB:P48540) /// 0043066 // negative regulation of apoptosis …	0005576 // extracellular region (PMID:9811930 [IDA])	0008083 // growth factor activity (GO_REF:0000029 [NAS]) /// 0042803 // protein homodimerization activity (PMID:8493557 [IDA]) /// 0005102 // receptor binding (PMID:10829012 [TAS]) /// 0042803 // protein homodimerization activity (PMID:8988018 [IDA])	Glial cell line-derived neurotrophic factor	GDNF_HUMAN|GDNF	protein	taxon:9606	20110409	UniProtKB			0.0740157	0.538226	4	0	4101	24	25	3	3	1	0	0	0	0
GJB4	0.0548766	0.0548766	0.0548766	2.54033	0.723028	0.723028	0.723028	3.79087	7.23028e-07	3.79087	0.648994	0.516342	1	1	7.23028e-07	3.79087	0.648994	0.516343	1	1	UniProtKB	Q9NTQ9	GJB4		0007608 // sensory perception of smell (GO_REF:0000019 [IEA] Ensembl:ENSMUSP00000101696) /// 0042048 // olfactory behavior (GO_REF:0000019 [IEA] Ensembl:ENSMUSP00000101696) /// 0007154 // cell communication (GO_REF:0000029 [NAS])	0005922 // connexon complex (GO_REF:0000002 [IEA] InterPro:IPR000500|InterPro:IPR002271|InterPro:IPR017990) /// 0016021 // integral to membrane (GO_REF:0000037 [IEA] UniProtKB-KW:KW-0812) /// 0005921 // gap junction (GO_REF:0000029 [NAS])	0005243 // gap junction channel activity (GO_REF:0000029 [NAS])	Gap junction beta-4 protein	CXB4_HUMAN|GJB4	protein	taxon:9606	20021104	UniProtKB			0.0356266	0.259069	1	1	2840	1	1	1	1	1	0	0	0	0
GRIK4	0.0542841	0.0542841	0.0542841	2.54033	0.715221	0.715221	0.715221	3.79087	7.15221e-07	3.79087	0.64548	0.518616	1	1	7.15221e-07	3.79087	0.64548	0.518616	1	1	UniProtKB	Q16099	GRIK4		0007215 // glutamate signaling pathway (PMID:8263508 [TAS]) /// 0007268 // synaptic transmission (Reactome:REACT_13685 [TAS]) /// 0031960 // response to corticosteroid stimulus (GO_REF:0000019 [IEA] Ensembl:ENSRNOP00000047794) /// 0007268 // synaptic transmission (Reactome:REACT_13477 [TAS]) /// 0006810 // transport (PMID:8263508 [TAS])	0032983 // kainate selective glutamate receptor complex (GO_REF:0000019 [IEA] Ensembl:ENSMUSP00000110515) /// 0045211 // postsynaptic membrane (GO_REF:0000039 [IEA] UniProtKB-SubCell:SL-0219) /// 0030054 // cell junction (GO_REF:0000037 [IEA] UniProtKB-KW:KW-0965) /// 0042734 // presynaptic membrane (GO_REF:0000019 [IEA] Ensembl:ENSMUSP00000110515) /// 0005886 // plasma membrane (Reactome:REACT_2…	0005234 // extracellular-glutamate-gated ion channel activity (GO_REF:0000002 [IEA] InterPro:IPR001320|InterPro:IPR001508|InterPro:IPR019594) /// 0015277	Glutamate receptor ionotropic, kainate 4	GRIK4_HUMAN|GRIK|GRIK4	protein	taxon:9606	20130119	InterPro			0.0352419	0.256271	1	0	2871	154	169	1	1	1	0	0	1	1
GRM1	0.02246	0.02246	0.02246	2.54033	0.295922	0.295922	0.295922	3.79087	2.95922e-07	3.79087	0.415194	0.678	1	1	2.95922e-07	3.79087	0.415194	0.678	1	1	UniProtKB	F8W805, Q13255	GRM1		0019722 // calcium-mediated signaling (GO_REF:0000019 [IEA] Ensembl:ENSRNOP00000019319) /// 0007186 // G-protein coupled receptor protein signaling pathway (PMID:7476890 [TAS]) /// 0051930 // regulation of sensory perception of pain (GO_REF:0000019 [IEA] Ensembl:ENSMUSP00000037255) /// 0019233 // sensory perception of pain (GO_REF:0000019 [IEA] Ensembl:ENSRNOP00000019319) /// 0000187 // activatio…	0005886 // plasma membrane (Reactome:REACT_18380 [TAS]) /// 0005887 // integral to plasma membrane (PMID:7476890 [TAS]) /// 0005886 // plasma membrane (GO_REF:0000040 [IEA] UniProtKB-SubCell:SL-0039) /// 0042734 // presynaptic membrane (GO_REF:0000019 [IEA] Ensembl:ENSRNOP00000019319) /// 0030424 // axon (GO_REF:0000019 [IEA] Ensembl:ENSRNOP00000019319) /// 0016021 // integral to membrane (GO_REF…	0004930 // G-protein coupled receptor activity (GO_REF:0000038 [IEA] UniProtKB-KW:KW-0297) /// 0008066 // glutamate receptor activity (PMID:7476890 [TAS]) /// 0030331 // estrogen receptor binding (GO_REF:0000019 [IEA] Ensembl:ENSRNOP00000019319) /// 0004930 // G-protein coupled receptor activity (PMID:7476890 [TAS])	Metabotropic glutamate receptor 1	F8W805_HUMAN|GRM1	protein	taxon:9606	20130119	UniProtKB			0.0145813	0.106032	2	0	6939	247	264	1	1	1	0	0	0	0
HTR2C (NT_028405 250882..576956)	0.032187	0.032187	0.032187	2.54033	0.424081	0.424081	0.424081	3.79087	4.24081e-07	3.79087	0.497035	0.619164	1	1	4.24081e-07	3.79087	0.497035	0.619164	1	1																0.0208962	0.151953	3	0	4842	28	179	0	1	0	0	0	0	0
IL1R2	0.100874	0.100874	0.100874	2.54033	1.32906	1.32906	1.32906	3.79087	1.32906e-06	3.79087	0.879904	0.378911	1	1	1.32906e-06	3.79087	0.879905	0.378911	1	1	UniProtKB	P27930, C9JNR0	IL1R2		0006955 // immune response (PMID:8898719 [TAS])	0005886 // plasma membrane (Reactome:REACT_22253 [TAS]) /// 0016021 // integral to membrane (GO_REF:0000037 [IEA] UniProtKB-KW:KW-0812) /// 0005576 // extracellular region (GO_REF:0000039 [IEA] UniProtKB-SubCell:SL-0243) /// 0005886 // plasma membrane (Reactome:REACT_22331 [TAS])	0005515 // protein binding (PMID:1830582 [IPI] UniProtKB:P18510) /// 0004908 // interleukin-1 receptor activity (PMID:10191101 [TAS]) /// 0004910 // interleukin-1, Type II, blocking receptor activity (GO_REF:0000002 [IEA] InterPro:IPR004077)	Interleukin-1 receptor type 2, soluble form	C9JNR0_HUMAN|IL1R2	protein	taxon:9606	20130119	InterPro			0.0654883	0.476217	2	0	1545	90	111	1	1	1	0	0	1	1
JAM2	0.0333725	0.0333725	0.0333725	2.54033	0.4397	0.4397	0.4397	3.79087	4.397e-07	3.79087	0.506106	0.612783	1	1	4.397e-07	3.79087	0.506106	0.612783	1	1	UniProtKB	P57087	JAM2		0050900 // leukocyte migration (Reactome:REACT_12051 [TAS]) /// 0016337 // cell-cell adhesion (PMID:10779521 [NAS]) /// 0007162 // negative regulation of cell adhesion (GO_REF:0000019 [IEA] Ensembl:ENSMUSP00000109833) /// 0007596 // blood coagulation (Reactome:REACT_604 [TAS])	0005887 // integral to plasma membrane (PMID:10779521 [NAS]) /// 0005923 // tight junction (GO_REF:0000039 [IEA] UniProtKB-SubCell:SL-0265) /// 0005886 // plasma membrane (Reactome:REACT_12053 [TAS]) /// 0005886 // plasma membrane (Reactome:REACT_11994 [TAS]) /// 0005886 // plasma membrane (Reactome:REACT_12040 [TAS])	0046982 // protein heterodimerization activity (GO_REF:0000019 [IEA] Ensembl:ENSMUSP00000109833) /// 0005515 // protein binding (PMID:21982860 [IPI] UniProtKB:Q9BX67)	Junctional adhesion molecule B	JAM2_HUMAN|C21orf43|JAM2|UNQ219/PRO245|VEJAM	protein	taxon:9606	20130121	IntAct			0.0216658	0.157549	3	0	4670	69	76	1	1	1	0	0	0	0
LDB2	0.0580878	0.0580878	0.0580878	2.54033	0.765337	0.765337	0.765337	3.79087	7.65337e-07	3.79087	0.667712	0.504317	1	1	7.65337e-07	3.79087	0.667712	0.504317	1	1	UniProtKB	G5E9Y7, E9PGU0, E7EX95, H0YA09, B7Z2D3, E9PFI4, O43679, D6RAT1	LDB2		0001942 // hair follicle development (GO_REF:0000019 [IEA] Ensembl:ENSMUSP00000067737) /// 0045944 // positive regulation of transcription from RNA polymerase II promoter (GO_REF:0000019 [IEA] Ensembl:ENSMUSP00000067737) /// 0035019 // somatic stem cell maintenance (GO_REF:0000019 [IEA] Ensembl:ENSMUSP00000067737) /// 0010669 // epithelial structure maintenance (GO_REF:0000019 [IEA] Ensembl:ENSMU…	0005634 // nucleus (PMID:9853615 [IDA]) /// 0005634 // nucleus (GO_REF:0000002 [IEA] InterPro:IPR002691) /// 0005667 // transcription factor complex (GO_REF:0000019 [IEA] Ensembl:ENSMUSP00000067737)	0030274 // LIM domain binding (GO_REF:0000002 [IEA] InterPro:IPR002691) /// 0019899 // enzyme binding (GO_REF:0000019 [IEA] Ensembl:ENSMUSP00000067737) /// 0030274 // LIM domain binding (GO_REF:0000024 [ISS] UniProtKB:P70662) /// 0003712 // transcription cofactor activity (GO_REF:0000002 [IEA] InterPro:IPR002691)	LIM domain-binding protein 2	B7Z2D3_HUMAN|LDB2	protein	taxon:9606	20130119	InterPro			0.0377113	0.274228	2	0	2683	270	312	1	1	1	0	0	0	0
LGI2	0.0245858	0.0245858	0.0245858	2.54033	0.323931	0.323931	0.323931	3.79087	3.23931e-07	3.79087	0.434399	0.663998	1	1	3.23931e-07	3.79087	0.434399	0.663999	1	1	UniProtKB	Q8N0V4	LGI2			0005576 // extracellular region (GO_REF:0000039 [IEA] UniProtKB-SubCell:SL-0243)		Leucine-rich repeat LGI family member 2	LGI2_HUMAN|LGI2|KIAA1916|LGIL2	protein	taxon:9606	20130119	UniProtKB			0.0159614	0.116068	1	1	6339	21	21	1	1	1	0	0	0	0
LHFPL4	0.0319364	0.0319364	0.0319364	2.54033	0.420779	0.420779	0.420779	3.79087	4.20779e-07	3.79087	0.495096	0.620532	1	1	4.20779e-07	3.79087	0.495096	0.620532	1	1	UniProtKB	Q7Z7J7	LHFPL4			0016021 // integral to membrane (GO_REF:0000037 [IEA] UniProtKB-KW:KW-0812)		Lipoma HMGIC fusion partner-like 4 protein	LHPL4_HUMAN|LHFPL4	protein	taxon:9606	20130119	UniProtKB			0.0207335	0.150769	1	1	4880	50	54	1	1	1	0	0	0	0
LIPJ	0.10502	0.10502	0.10502	2.54033	1.38369	1.38369	1.38369	3.79087	1.38369e-06	3.79087	0.897807	0.369289	1	1	1.38369e-06	3.79087	0.897807	0.369289	1	1	UniProtKB	Q5W064	LIPJ		0016042 // lipid catabolic process (GO_REF:0000037 [IEA] UniProtKB-KW:KW-0442)		0016788 // hydrolase activity, acting on ester bonds (GO_REF:0000002 [IEA] InterPro:IPR025483)	Lipase member J	LIPJ_HUMAN|LIPL1|LIPJ	protein	taxon:9606	20130119	UniProtKB			0.0681802	0.495792	1	1	1484	8	8	1	1	1	0	0	0	0
LOC100129098	0.0648563	0.0648563	0.0648563	2.54033	0.854515	0.854515	0.854515	3.79087	8.54515e-07	3.79087	0.705542	0.480473	1	1	8.54515e-07	3.79087	0.705542	0.480473	1	1																0.0421055	0.306182	1	1	2403	1	1	1	1	1	0	0	0	0
LOC100288807	0.147167	0.147167	0.147167	2.54033	1.939	1.939	1.939	3.79087	1.939e-06	3.79087	1.0628	0.287872	1	1	1.939e-06	3.79087	1.0628	0.287872	1	1																0.0955424	0.694764	1	1	1059	2	10	0	1	0	0	0	0	0
LOC100996350	0.102398	0.102398	0.102398	2.54033	1.34915	1.34915	1.34915	3.79087	1.34915e-06	3.79087	0.886528	0.375333	1	1	1.34915e-06	3.79087	0.886528	0.375333	1	1																0.0664779	0.483413	1	1	1522	0	1	0	1	0	0	0	0	0
LOC400682 (NT_011295 13063653..13102042)	0.103143	0.103143	0.103143	2.54033	1.35897	1.35897	1.35897	3.79087	1.35897e-06	3.79087	0.889749	0.373601	1	1	1.35897e-06	3.79087	0.889749	0.373601	1	1																0.0669619	0.486932	1	1	1511	46	57	0	1	0	0	0	0	0
LRIT3	0.0437043	0.0437043	0.0437043	2.54033	0.575827	0.575827	0.575827	3.79087	5.75827e-07	3.79087	0.579174	0.562472	1	1	5.75827e-07	3.79087	0.579174	0.562472	1	1	UniProtKB	Q3SXY7	LRIT3			0016021 // integral to membrane (GO_REF:0000037 [IEA] UniProtKB-KW:KW-0812)		Leucine-rich repeat, immunoglobulin-like domain and transmembrane domain-containing protein 3	LRIT3_HUMAN|LRIT3	protein	taxon:9606	20130119	UniProtKB			0.0283734	0.206325	1	1	3566	15	15	1	1	1	0	0	0	0
LURAP1	0.0842886	0.0842886	0.0842886	2.54033	1.11055	1.11055	1.11055	3.79087	1.11055e-06	3.79087	0.804324	0.42121	1	1	1.11055e-06	3.79087	0.804325	0.42121	1	1	UniProtKB	Q96LR2	LURAP1		0043123 // positive regulation of I-kappaB kinase/NF-kappaB cascade (PMID:21048106 [IDA]) /// 0001819 // positive regulation of cytokine production (PMID:21048106 [IDA])	0005737 // cytoplasm (PMID:21048106 [IDA])		Leucine rich adaptor protein 1	LURA1_HUMAN|LURAP1|C1orf190|LRAP35A|LRP35A	protein	taxon:9606	20110415	UniProtKB			0.0547212	0.39792	1	1	1849	2	2	1	1	1	0	0	0	0
MFSD6L	0.0695757	0.0695757	0.0695757	2.54033	0.916696	0.916696	0.916696	3.79087	9.16696e-07	3.79087	0.730762	0.464925	1	1	9.16696e-07	3.79087	0.730762	0.464925	1	1	UniProtKB	Q8IWD5	MFSD6L			0016021 // integral to membrane (GO_REF:0000037 [IEA] UniProtKB-KW:KW-0812)		Major facilitator superfamily domain-containing protein 6-like	MFS6L_HUMAN|MFSD6L|FP7072	protein	taxon:9606	20130119	UniProtKB			0.0451694	0.328462	1	1	2240	1	1	1	1	1	0	0	0	0
MICALCL	0.051199	0.051199	0.051199	2.54033	0.674573	0.674573	0.674573	3.79087	6.74573e-07	3.79087	0.62687	0.530745	1	1	6.74573e-07	3.79087	0.62687	0.530745	1	1	UniProtKB	Q6ZW33, E9PRG5	MICALCL		0030154 // cell differentiation (GO_REF:0000037 [IEA] UniProtKB-KW:KW-0221) /// 0008150 // biological_process (GO_REF:0000015 [ND]) /// 0007275 // multicellular organismal development (GO_REF:0000037 [IEA] UniProtKB-KW:KW-0217) /// 0007283 // spermatogenesis (GO_REF:0000037 [IEA] UniProtKB-KW:KW-0744)	0005737 // cytoplasm (GO_REF:0000024 [ISS] UniProtKB:Q9D5U9) /// 0005737 // cytoplasm (GO_REF:0000019 [IEA] Ensembl:ENSMUSP00000062443)	0051019 // mitogen-activated protein kinase binding (GO_REF:0000019 [IEA] Ensembl:ENSMUSP00000062443) /// 0051019 // mitogen-activated protein kinase binding (GO_REF:0000024 [ISS] UniProtKB:Q9D5U9)	MICAL C-terminal-like protein	E9PRG5_HUMAN|MICALCL	protein	taxon:9606	20130119	ENSEMBL			0.033239	0.241707	1	1	3044	43	46	1	1	1	1	1	0	0
OR56A3	0.164398	0.164398	0.164398	2.54033	2.16603	2.16603	2.16603	3.79087	2.16603e-06	3.79087	1.1233	0.26131	1	1	2.16603e-06	3.79087	1.1233	0.26131	1	1	UniProtKB	Q8NH54	OR56A3			0016021 // integral to membrane (GO_REF:0000037 [IEA] UniProtKB-KW:KW-0812) /// 0005886 // plasma membrane (Reactome:REACT_15515 [TAS])	0004930 // G-protein coupled receptor activity (GO_REF:0000037 [IEA] UniProtKB-KW:KW-0297) /// 0004984 // olfactory receptor activity (GO_REF:0000002 [IEA] InterPro:IPR000725)	Olfactory receptor 56A3	O56A3_HUMAN|OR56A3P|OR56A3|OR56A6	protein	taxon:9606	20130119	UniProtKB			0.106729	0.776113	1	1	948	1	1	1	1	1	0	0	0	0
OTP	0.0581963	0.0581963	0.0581963	2.54033	0.766766	0.766766	0.766766	3.79087	7.66766e-07	3.79087	0.668335	0.50392	1	1	7.66766e-07	3.79087	0.668335	0.50392	1	1	UniProtKB	Q5XKR4	OTP		0021879 // forebrain neuron differentiation (GO_REF:0000019 [IEA] Ensembl:ENSMUSP00000022195) /// 0006351 // transcription, DNA-dependent (GO_REF:0000037 [IEA] UniProtKB-KW:KW-0804) /// 0021985 // neurohypophysis development (GO_REF:0000019 [IEA] Ensembl:ENSMUSP00000022195) /// 0002052 // positive regulation of neuroblast proliferation (GO_REF:0000019 [IEA] Ensembl:ENSMUSP00000022195) /// 0021979…	0005634 // nucleus (GO_REF:0000039 [IEA] UniProtKB-SubCell:SL-0191)	0003700 // transcription factor activity (GO_REF:0000002 [IEA] InterPro:IPR001356) /// 0000976	Homeobox protein orthopedia	OTP_HUMAN|OTP	protein	taxon:9606	20130119	InterPro			0.0377817	0.27474	1	1	2678	6	6	1	1	1	0	0	0	0
PARP11	0.0693899	0.0693899	0.0693899	2.54033	0.914247	0.914247	0.914247	3.79087	9.14247e-07	3.79087	0.729785	0.465522	1	1	9.14247e-07	3.79087	0.729785	0.465522	1	1	UniProtKB	Q9NR21, G3V0I3, F8WBZ7	PARP11				0003950 // NAD+ ADP-ribosyltransferase activity (GO_REF:0000003 [IEA] EC:2.4.2.30) /// 0003950 // NAD+ ADP-ribosyltransferase activity (GO_REF:0000002 [IEA] InterPro:IPR012317)	Poly [ADP-ribose] polymerase 11	F8WBZ7_HUMAN|PARP11	protein	taxon:9606	20130119	InterPro			0.0450487	0.327585	1	1	4492	50	75	2	2	1	0	0	0	0
PCSK1N (NT_079573 11541249..11545704)	0.320349	0.320349	0.320349	2.54033	4.22076	4.22076	4.22076	3.79087	4.22076e-06	3.79087	1.56805	0.11687	1	1	4.22076e-06	3.79087	1.56805	0.11687	1	1																0.207974	1.51234	1	1	973	0	3	0	2	0	0	0	0	0
PIWIL3	0.0444269	0.0444269	0.0444269	2.54033	0.585348	0.585348	0.585348	3.79087	5.85348e-07	3.79087	0.583942	0.559259	1	1	5.85348e-07	3.79087	0.583942	0.559259	1	1	UniProtKB	E9PIP6, Q7Z3Z3	PIWIL3		0031047 // gene silencing by RNA (GO_REF:0000037 [IEA] UniProtKB-KW:KW-0943) /// 0030154 // cell differentiation (GO_REF:0000037 [IEA] UniProtKB-KW:KW-0221) /// 0006417 // regulation of translation (GO_REF:0000037 [IEA] UniProtKB-KW:KW-0810) /// 0007275 // multicellular organismal development (GO_REF:0000037 [IEA] UniProtKB-KW:KW-0217) /// 0007283 // spermatogenesis (GO_REF:0000037 [IEA] UniProtK…	0005737 // cytoplasm (GO_REF:0000039 [IEA] UniProtKB-SubCell:SL-0086)	0003676 // nucleic acid binding (GO_REF:0000002 [IEA] InterPro:IPR012337) /// 0003723 // RNA binding (GO_REF:0000037 [IEA] UniProtKB-KW:KW-0694)	Piwi-like protein 3	E9PIP6_HUMAN|PIWIL3	protein	taxon:9606	20130119	InterPro			0.0288425	0.209736	2	0	3508	66	73	1	1	1	0	0	0	0
PRSS37	0.1302	0.1302	0.1302	2.54033	1.71546	1.71546	1.71546	3.79087	1.71546e-06	3.79087	0.999661	0.317475	1	1	1.71546e-06	3.79087	0.999661	0.317475	1	1	UniProtKB	F8WBF8, A4D1T9	PRSS37		0006508 // proteolysis (GO_REF:0000002 [IEA] InterPro:IPR001254|InterPro:IPR001314)	0005576 // extracellular region (GO_REF:0000039 [IEA] UniProtKB-SubCell:SL-0243)	0003824 // catalytic activity (GO_REF:0000002 [IEA] InterPro:IPR009003) /// 0004252 // serine-type endopeptidase activity (GO_REF:0000002 [IEA] InterPro:IPR001254|InterPro:IPR001314)	Probable inactive serine protease 37	PRS37_HUMAN|TRYX2|PRSS37	protein	taxon:9606	20130119	InterPro			0.0845275	0.614666	2	0	1197	4	4	1	1	1	0	0	1	1
RBP4	0.335521	0.335521	0.335521	2.54033	4.42067	4.42067	4.42067	3.79087	4.42067e-06	3.79087	1.60475	0.108549	1	1	4.42067e-06	3.79087	1.60475	0.108549	1	1	UniProtKB	P02753, Q5VY30	RBP4		0060157 // urinary bladder development (GO_REF:0000024 [ISS] UniProtKB:Q00724) /// 0006094 // gluconeogenesis (PMID:18466349 [IMP]) /// 0048706 // embryonic skeletal system development (GO_REF:0000024 [ISS] UniProtKB:Q00724) /// 0048807 // female genitalia morphogenesis (GO_REF:0000024 [ISS] UniProtKB:Q00724) /// 0051024 // positive regulation of immunoglobulin secretion (GO_REF:0000024 [ISS] Uni…	0005576 // extracellular region (GO_REF:0000038 [IEA] UniProtKB-KW:KW-0964) /// 0005615 // extracellular space (PMID:5132677 [IDA]) /// 0005615 // extracellular space (PMID:17003346 [IDA]) /// 0005615 // extracellular space (GO_REF:0000024 [ISS] UniProtKB:Q00724)	0036094 /// 0019841 // retinol binding (PMID:571335 [IDA]) /// 0005515 // protein binding (PMID:986177 [IPI] UniProtKB:P27731) /// 0005501 // retinoid binding (GO_REF:0000002 [IEA] InterPro:IPR002449) /// 0016918 // retinal binding (GO_REF:0000037 [IEA] UniProtKB-KW:KW-0845) /// 0005215 // transporter activity (GO_REF:0000002 [IEA] InterPro:IPR002449) /// 0034632 // retinol transporter activity (…	Retinol-binding protein 4	RET4_HUMAN|RBP4|PRO2222	protein	taxon:9606	20081104	BHF-UCL			0.217824	1.58397	1	1	929	13	13	2	2	1	1	1	0	0
RGCC	0.140659	0.140659	0.140659	2.54033	1.85325	1.85325	1.85325	3.79087	1.85325e-06	3.79087	1.03903	0.298789	1	1	1.85325e-06	3.79087	1.03903	0.298789	1	1	UniProtKB	Q9H4X1	RGCC		0060630 // regulation of M/G1 transition of mitotic cell cycle (PMID:17146433 [IDA]) /// 0003331 /// 2000353 /// 0010718 // positive regulation of epithelial to mesenchymal transition (PMID:19158077 [IMP]) /// 0045750 // positive regulation of S phase of mitotic cell cycle (PMID:11687586 [IDA]) /// 0051496 // positive regulation of stress fiber formation (PMID:19158077 [IDA]) /// 0071850 /// 0001…	0005634 // nucleus (PMID:18029348 [IDA]) /// 0005737 // cytoplasm (PMID:11687586 [IDA]) /// 0005737 // cytoplasm (PMID:18029348 [IDA]) /// 0005813 // centrosome (PMID:17146433 [IDA]) /// 0005730 // nucleolus (PMID:18029348 [IDA]) /// 0005737 // cytoplasm (PMID:17146433 [IDA]) /// 0005634 // nucleus (PMID:11687586 [IDA])	0005515 // protein binding (PMID:19162005 [IPI] UniProtKB:P31749) /// 0019901 // protein kinase binding (PMID:11687586 [IPI] UniProtKB:P06493) /// 0019901 // protein kinase binding (PMID:17146433 [IPI] UniProtKB:P53350) /// 0019901 // protein kinase binding (GO_REF:0000024 [ISS] UniProtKB:Q9Z2P4) /// 0070412 // R-SMAD binding (PMID:21307346 [IPI] UniProtKB:P84022) /// 0030295 // protein kinase ac…	Regulator of cell cycle RGCC	RGCC_HUMAN|C13orf15|RGCC|RGC32	protein	taxon:9606	20120725	BHF-UCL			0.0913172	0.664039	1	0	1108	5	5	1	1	1	0	0	1	1
RHBDL3	0.033437	0.033437	0.033437	2.54033	0.440549	0.440549	0.440549	3.79087	4.40549e-07	3.79087	0.506594	0.61244	1	1	4.40549e-07	3.79087	0.506594	0.61244	1	1	UniProtKB	P58872, A4FU16, Q495Y5, Q495Y4	RHBDL3		0006508 // proteolysis (GO_REF:0000002 [IEA] InterPro:IPR002610) /// 0006508 // proteolysis (GO_REF:0000037 [IEA] UniProtKB-KW:KW-0645)	0016021 // integral to membrane (GO_REF:0000037 [IEA] UniProtKB-KW:KW-0812) /// 0016021 // integral to membrane (GO_REF:0000002 [IEA] InterPro:IPR002610|InterPro:IPR017213|InterPro:IPR022764) /// 0016021 // integral to membrane (GO_REF:0000002 [IEA] InterPro:IPR002610|InterPro:IPR022764)	0004252 // serine-type endopeptidase activity (GO_REF:0000002 [IEA] InterPro:IPR002610|InterPro:IPR022764) /// 0004252 // serine-type endopeptidase activity (GO_REF:0000002 [IEA] InterPro:IPR002610|InterPro:IPR017213|InterPro:IPR022764) /// 0005509 // calcium ion binding (GO_REF:0000002 [IEA] InterPro:IPR011992)	RHBDL3 protein	A4FU16_HUMAN|RHBDL3	protein	taxon:9606	20130119	InterPro			0.0217077	0.157853	1	1	4661	48	50	1	1	1	0	0	0	0
SEC14L5	0.0241403	0.0241403	0.0241403	2.54033	0.318061	0.318061	0.318061	3.79087	3.18061e-07	3.79087	0.430445	0.666872	1	1	3.18061e-07	3.79087	0.430445	0.666872	1	1	UniProtKB	O43304	SEC14L5			0005622 // intracellular (GO_REF:0000002 [IEA] InterPro:IPR001071) /// 0016021 // integral to membrane (GO_REF:0000002 [IEA] InterPro:IPR009038)	0005215 // transporter activity (GO_REF:0000002 [IEA] InterPro:IPR001071)	SEC14-like protein 5	S14L5_HUMAN|KIAA0420|SEC14L5	protein	taxon:9606	20130119	InterPro			0.0156722	0.113965	1	1	6456	56	60	1	1	1	0	0	0	0
SHISA6	0.0630545	0.0630545	0.0630545	2.54033	0.830775	0.830775	0.830775	3.79087	8.30775e-07	3.79087	0.695672	0.486634	1	1	8.30775e-07	3.79087	0.695672	0.486634	1	1	UniProtKB	Q6ZSJ9	SHISA6			0016021 // integral to membrane (GO_REF:0000037 [IEA] UniProtKB-KW:KW-0812)		Protein shisa-6 homolog	SHSA6_HUMAN|SHISA6	protein	taxon:9606	20130119	UniProtKB			0.0409357	0.297676	3	0	7415	206	224	3	3	1	0	0	2	2
SIGLEC9	0.0771533	0.0771533	0.0771533	2.54033	1.01653	1.01653	1.01653	3.79087	1.01653e-06	3.79087	0.769527	0.44158	1	1	1.01653e-06	3.79087	0.769527	0.44158	1	1	UniProtKB	Q9Y336	SIGLEC9		0007166 // cell surface receptor linked signal transduction (PMID:10801860 [NAS]) /// 0007155 // cell adhesion (GO_REF:0000037 [IEA] UniProtKB-KW:KW-0130)	0005887 // integral to plasma membrane (PMID:10801860 [NAS])	0030246 // carbohydrate binding (PMID:10801860 [NAS])	Sialic acid-binding Ig-like lectin 9	SIGL9_HUMAN|UNQ668/PRO1302|SIGLEC9	protein	taxon:9606	20030404	UniProtKB			0.0500888	0.364235	2	1	2020	8	8	1	1	1	0	0	0	0
SLC14A1	0.035125	0.035125	0.035125	2.54033	0.46279	0.46279	0.46279	3.79087	4.6279e-07	3.79087	0.519224	0.603604	1	1	4.6279e-07	3.79087	0.519224	0.603605	1	1	UniProtKB	K7EJF6, F5GWS2, E9NSU1, Q13336, K7EKN6, K7ELI3, K7EL30, B4DFJ8, K7EJ54, K7ESL3, K7EQM7, B3KXJ3	SLC14A1		0055085 // transmembrane transport (Reactome:REACT_15518 [TAS]) /// 0015840 // urea transport (PMID:7989337 [TAS]) /// 0055085 // transmembrane transport (Reactome:REACT_19118 [TAS])	0016021 // integral to membrane (GO_REF:0000002 [IEA] InterPro:IPR004937) /// 0005887 // integral to plasma membrane (PMID:7989337 [TAS]) /// 0005886 // plasma membrane (GO_REF:0000019 [IEA] Ensembl:ENSMUSP00000125114) /// 0005886 // plasma membrane (Reactome:REACT_20655 [TAS])	0005372 // water transporter activity (GO_REF:0000019 [IEA] Ensembl:ENSMUSP00000125114) /// 0015204 // urea transmembrane transporter activity (GO_REF:0000002 [IEA] InterPro:IPR004937) /// 0008519 // ammonium transmembrane transporter activity (GO_REF:0000002 [IEA] InterPro:IPR024041) /// 0015204 // urea transmembrane transporter activity (GO_REF:0000019 [IEA] Ensembl:ENSMUSP00000125114)	Urea transporter 1	B3KXJ3_HUMAN|SLC14A1	protein	taxon:9606	20130119	InterPro			0.0228036	0.165823	4	0	4437	31	31	1	1	1	0	0	0	0
SLC22A14	0.0788314	0.0788314	0.0788314	2.54033	1.03864	1.03864	1.03864	3.79087	1.03864e-06	3.79087	0.777851	0.436657	1	1	1.03864e-06	3.79087	0.777851	0.436657	1	1	UniProtKB	C9JI12, F5H7H1, Q9Y267	SLC22A14		0015695 // organic cation transport (PMID:10072596 [NAS])	0005887 // integral to plasma membrane (PMID:10072596 [NAS]) /// 0016021 // integral to membrane (GO_REF:0000038 [IEA] UniProtKB-KW:KW-0812)	0015101 // organic cation transmembrane transporter activity (PMID:10072596 [NAS]) /// 0022857 // transmembrane transporter activity (GO_REF:0000002 [IEA] InterPro:IPR005828)	Solute carrier family 22 member 14	C9JI12_HUMAN|SLC22A14	protein	taxon:9606	20130119	UniProtKB			0.0511783	0.372157	1	1	1977	1	1	1	1	1	0	0	0	0
SLC26A9	0.0649509	0.0649509	0.0649509	2.54033	0.855762	0.855762	0.855762	3.79087	8.55762e-07	3.79087	0.706056	0.480153	1	1	8.55762e-07	3.79087	0.706056	0.480153	1	1	UniProtKB	Q7LBE3, B1AVM8	SLC26A9		0006811 // ion transport (Reactome:REACT_19397 [TAS]) /// 0055085 // transmembrane transport (Reactome:REACT_15518 [TAS]) /// 0055085 // transmembrane transport (Reactome:REACT_19118 [TAS]) /// 0006821 // chloride transport (GO_REF:0000019 [IEA] Ensembl:ENSMUSP00000036916) /// 0008272 // sulfate transport (GO_REF:0000002 [IEA] InterPro:IPR001902|InterPro:IPR011547) /// 0006885 // regulation of pH…	0016021 // integral to membrane (GO_REF:0000037 [IEA] UniProtKB-KW:KW-0812) /// 0016021 // integral to membrane (GO_REF:0000038 [IEA] UniProtKB-KW:KW-0812) /// 0005886 // plasma membrane (Reactome:REACT_19248 [TAS]) /// 0016324 // apical plasma membrane (GO_REF:0000019 [IEA] Ensembl:ENSMUSP00000036916)	0015301 // anion:anion antiporter activity (GO_REF:0000019 [IEA] Ensembl:ENSMUSP00000036916) /// 0008271 // secondary active sulfate transmembrane transporter activity (GO_REF:0000002 [IEA] InterPro:IPR001902) /// 0015106 // bicarbonate transmembrane transporter activity (GO_REF:0000019 [IEA] Ensembl:ENSMUSP00000036916)	Solute carrier family 26, member 9	B1AVM8_HUMAN|SLC26A9|RP4-681L3.1-003	protein	taxon:9606	20130119	ENSEMBL			0.0421669	0.306628	2	0	4799	10	10	2	2	1	0	0	0	0
TAS2R14 (NW_003571050 136959..137913)	0.490093	0.490093	0.490093	2.54033	6.45723	6.45723	6.45723	3.79087	6.45723e-06	3.79087	1.93949	0.0524419	0.924035	1	6.45723e-06	3.79087	1.93949	0.0524419	0.924034	1																0.318174	2.31369	1	1	954	0	3	0	3	0	0	0	0	0
TSLP	0.110297	0.110297	0.110297	2.54033	1.45322	1.45322	1.45322	3.79087	1.45322e-06	3.79087	0.920087	0.357528	1	1	1.45322e-06	3.79087	0.920087	0.357528	1	1	UniProtKB	G3XAM8, Q969D9	TSLP			0005615 // extracellular space (GO_REF:0000037 [IEA] UniProtKB-KW:KW-0202)	0005125 // cytokine activity (GO_REF:0000019 [IEA] Ensembl:ENSMUSP00000025237)	Thymic stromal lymphopoietin, isoform CRA_b	G3XAM8_HUMAN|hCG_37448|TSLP	protein	taxon:9606	20130119	ENSEMBL			0.0716061	0.520704	2	0	2826	5	5	2	2	1	0	0	0	0
USP44	0.0439013	0.0439013	0.0439013	2.54033	0.578422	0.578422	0.578422	3.79087	5.78422e-07	3.79087	0.580478	0.561593	1	1	5.78422e-07	3.79087	0.580478	0.561593	1	1	UniProtKB	F8VRI7, F8VRW0, Q9H0E7, F8VVD6	USP44		0060564 // negative regulation of anaphase-promoting complex activity during mitotic cell cycle (PMID:17443180 [IMP]) /// 0016579 // protein deubiquitination (PMID:20402667 [IDA]) /// 0016579 // protein deubiquitination (PMID:17443180 [IDA]) /// 0090231 /// 0090266 /// 0051301 // cell division (GO_REF:0000037 [IEA] UniProtKB-KW:KW-0132) /// 0043161 // proteasomal ubiquitin-dependent protein catab…	0005634 // nucleus (PMID:11256614 [IDA]) /// 0005634 // nucleus (PMID:20402667 [IDA])	0008270 // zinc ion binding (GO_REF:0000002 [IEA] InterPro:IPR001607) /// 0004221 // ubiquitin thiolesterase activity (GO_REF:0000002 [IEA] InterPro:IPR001394|InterPro:IPR018200) /// 0046872 // metal ion binding (GO_REF:0000037 [IEA] UniProtKB-KW:KW-0479) /// 0004843 // ubiquitin-specific protease activity (PMID:20402667 [IDA]) /// 0008234 // cysteine-type peptidase activity (GO_REF:0000038 [IEA]…	Ubiquitin carboxyl-terminal hydrolase 44	F8VRI7_HUMAN|USP44	protein	taxon:9606	20130119	InterPro			0.0285012	0.207255	2	0	3550	65	73	1	1	1	0	0	0	0
ZMYND15	0.0636641	0.0636641	0.0636641	2.54033	0.838807	0.838807	0.838807	3.79087	8.38807e-07	3.79087	0.699027	0.484535	1	1	8.38807e-07	3.79087	0.699027	0.484535	1	1	UniProtKB	Q9H091, I3L296	ZMYND15		0007286 // spermatid development (GO_REF:0000019 [IEA] Ensembl:ENSMUSP00000048816) /// 0006351 // transcription, DNA-dependent (GO_REF:0000037 [IEA] UniProtKB-KW:KW-0804) /// 0045892 // negative regulation of transcription, DNA-dependent (GO_REF:0000019 [IEA] Ensembl:ENSMUSP00000048816)	0005634 // nucleus (GO_REF:0000039 [IEA] UniProtKB-SubCell:SL-0191) /// 0005737 // cytoplasm (GO_REF:0000039 [IEA] UniProtKB-SubCell:SL-0086)	0046872 // metal ion binding (GO_REF:0000037 [IEA] UniProtKB-KW:KW-0479) /// 0008270 // zinc ion binding (GO_REF:0000002 [IEA] InterPro:IPR002893) /// 0046872 // metal ion binding (GO_REF:0000038 [IEA] UniProtKB-KW:KW-0479) /// 0042826 // histone deacetylase binding (GO_REF:0000019 [IEA] Ensembl:ENSMUSP00000048816)	Zinc finger, MYND-type containing 15, isoform CRA_a	I3L296_HUMAN|ZMYND15|hCG_32704	protein	taxon:9606	20130119	InterPro			0.0413315	0.300554	3	0	2448	2	2	1	1	1	0	0	0	0
ZNF366	0.0562634	0.0562634	0.0562634	2.54033	0.7413	0.7413	0.7413	3.79087	7.413e-07	3.79087	0.657143	0.511089	1	1	7.413e-07	3.79087	0.657143	0.511089	1	1	UniProtKB	Q8N895, F8W732	ZNF366		0043627 // response to estrogen stimulus (PMID:17085477 [IDA]) /// 0006351 // transcription, DNA-dependent (GO_REF:0000037 [IEA] UniProtKB-KW:KW-0804) /// 0000122 // negative regulation of transcription from RNA polymerase II promoter (PMID:17085477 [IDA]) /// 0033147 // negative regulation of estrogen receptor signaling pathway (PMID:17085477 [IDA])	0005634 // nucleus (PMID:17085477 [IDA]) /// 0005634 // nucleus (GO_REF:0000019 [IEA] Ensembl:ENSMUSP00000060040)	0005515 // protein binding (PMID:17085477 [IPI] UniProtKB:P03372) /// 0046872 // metal ion binding (GO_REF:0000037 [IEA] UniProtKB-KW:KW-0479) /// 0003677 // DNA binding (GO_REF:0000037 [IEA] UniProtKB-KW:KW-0238) /// 0030331 // estrogen receptor binding (PMID:17085477 [IDA]) /// 0008270 // zinc ion binding (GO_REF:0000002 [IEA] InterPro:IPR007087|InterPro:IPR015880) /// 0005515 // protein bindin…	Zinc finger protein 366	F8W732_HUMAN|ZNF366	protein	taxon:9606	20130119	ENSEMBL			0.0365269	0.265616	1	1	2770	24	27	1	1	1	0	0	0	0
ALAS2	0.0730317	0.0730317	0.0730317	2.54033	0.96223	0.96223	0.96223	3.79087	9.6223e-07	3.79087	0.748691	0.454044	1	1	9.6223e-07	3.79087	0.748691	0.454044	1	1	UniProtKB	P22557, H0Y6R3, Q5JZF5	ALAS2		0009058 // biosynthetic process (GO_REF:0000002 [IEA] InterPro:IPR004839) /// 0044281 /// 0006783 // heme biosynthetic process (GO_REF:0000024 [ISS] UniProtKB:P08680) /// 0006879 // cellular iron ion homeostasis (GO_REF:0000024 [ISS] UniProtKB:P08680) /// 0006782 // protoporphyrinogen IX biosynthetic process (GO_REF:0000041 [IEA] UniPathway:UPA00251) /// 0006778 // porphyrin metabolic process (Re…	0005739 // mitochondrion (PMID:10727444 [IDA]) /// 0005759 // mitochondrial matrix (GO_REF:0000002 [IEA] InterPro:IPR015118) /// 0005759 // mitochondrial matrix (Reactome:REACT_9463 [TAS]) /// 0005743 // mitochondrial inner membrane (PMID:14643893 [IDA])	0005515 // protein binding (PMID:14643893 [IPI] UniProtKB:Q9P2R7) /// 0050662 // coenzyme binding (GO_REF:0000024 [ISS] UniProtKB:Q63147) /// 0005515 // protein binding (PMID:10727444 [IPI] UniProtKB:Q9P2R7) /// 0005515 // protein binding (PMID:16234850 [IPI] UniProtKB:P40337) /// 0003870 // 5-aminolevulinate synthase activity (PMID:14643893 [IDA]) /// 0003870 // 5-aminolevulinate synthase activi…	5-aminolevulinate synthase, erythroid-specific, mitochondrial	H0Y6R3_HUMAN|ALAS2	protein	taxon:9606	20130119	InterPro			0.047413	0.344777	3	0	2134	15	15	1	1	1	1	1	0	0
C12orf28	0.0586121	0.0586121	0.0586121	2.54033	0.772245	0.772245	0.772245	3.79087	7.72245e-07	3.79087	0.670719	0.5024	1	1	7.72245e-07	3.79087	0.670719	0.5024	1	1	UniProtKB	Q96LU7, F8VY44, F8VVR8	C12orf28			0016021 // integral to membrane (GO_REF:0000037 [IEA] UniProtKB-KW:KW-0812)	0003700 // transcription factor activity (GO_REF:0000002 [IEA] InterPro:IPR008967) /// 0003677 // DNA binding (GO_REF:0000002 [IEA] InterPro:IPR024061) /// 0003677 // DNA binding (GO_REF:0000037 [IEA] UniProtKB-KW:KW-0238)	Uncharacterized protein C12orf28	F8VVR8_HUMAN|C12orf28	protein	taxon:9606	20130119	InterPro			0.0380517	0.276704	1	1	2659	41	43	1	1	1	0	0	0	0
C6orf136 (NT_167246 1962887..1969054)	0.0787517	0.0787517	0.0787517	2.54033	1.03759	1.03759	1.03759	3.79087	1.03759e-06	3.79087	0.777458	0.436889	1	1	1.03759e-06	3.79087	0.777458	0.436889	1	1																0.0511265	0.371781	3	0	1979	0	2	0	1	0	0	0	0	0
CCL16	0.208216	0.208216	0.208216	2.54033	2.74335	2.74335	2.74335	3.79087	2.74335e-06	3.79087	1.26417	0.20617	1	1	2.74335e-06	3.79087	1.26417	0.20617	1	1	UniProtKB	O15467, H0YCC1	CCL16		0006954 // inflammatory response (GO_REF:0000037 [IEA] UniProtKB-KW:KW-0395) /// 0006935 // chemotaxis (PMID:9642106 [TAS]) /// 0007267 // cell-cell signaling (PMID:9642106 [TAS]) /// 0007154 // cell communication (PMID:9642106 [TAS]) /// 0006955 // immune response (GO_REF:0000002 [IEA] InterPro:IPR000827|InterPro:IPR001811) /// 0050918 // positive chemotaxis (PMID:15001559 [IDA])	0005615 // extracellular space (GO_REF:0000037 [IEA] UniProtKB-KW:KW-0202) /// 0005576 // extracellular region (Reactome:REACT_15538 [TAS]) /// 0005615 // extracellular space (GO_REF:0000038 [IEA] UniProtKB-KW:KW-0202) /// 0005576 // extracellular region (Reactome:REACT_22289 [TAS]) /// 0005576 // extracellular region (Reactome:REACT_22239 [TAS]) /// 0005576 // extracellular region (Reactome:REAC…	0008009 // chemokine activity (GO_REF:0000002 [IEA] InterPro:IPR000827|InterPro:IPR001811) /// 0042056 // chemoattractant activity (PMID:15001559 [IDA])	C-C motif chemokine 16	H0YCC1_HUMAN|CCL16	protein	taxon:9606	20130119	UniProtKB			0.135176	0.982973	1	1	1497	4	4	2	2	1	0	0	0	0
GRIP1	0.0308003	0.0308003	0.0308003	2.54033	0.40581	0.40581	0.40581	3.79087	4.0581e-07	3.79087	0.48621	0.626818	1	1	4.0581e-07	3.79087	0.486211	0.626818	1	1	UniProtKB	Q9Y3R0, F5H5I0, F5H4P8, F5H424	GRIP1		0035556 /// 0030521 // androgen receptor signaling pathway (PMID:15572661 [NAS]) /// 0008104 // protein localization (GO_REF:0000019 [IEA] Ensembl:ENSMUSP00000123234) /// 0007268 // synaptic transmission (Reactome:REACT_13685 [TAS]) /// 0007268 // synaptic transmission (Reactome:REACT_13477 [TAS]) /// 0045893 // positive regulation of transcription, DNA-dependent (PMID:15572661 [NAS])	0005886 // plasma membrane (Reactome:REACT_18308 [TAS]) /// 0016023 // cytoplasmic membrane-bounded vesicle (GO_REF:0000039 [IEA] UniProtKB-SubCell:SL-0088) /// 0030054 // cell junction (GO_REF:0000037 [IEA] UniProtKB-KW:KW-0965) /// 0005829 // cytosol (Reactome:REACT_18308 [TAS]) /// 0005886 // plasma membrane (GO_REF:0000024 [ISS] UniProtKB:Q925T6) /// 0045121 // membrane raft (GO_REF:0000019 […	0003713 // transcription coactivator activity (PMID:15572661 [NAS]) /// 0030159 // receptor signaling complex scaffold activity (PMID:10197531 [NAS]) /// 0008013 // beta-catenin binding (PMID:16344550 [TAS]) /// 0050681 // androgen receptor binding (PMID:15572661 [NAS]) /// 0008022 // protein C-terminus binding (PMID:16344550 [IPI] UniProtKB:Q9P1Z2)	Glutamate receptor-interacting protein 1	F5H424_HUMAN|GRIP1	protein	taxon:9606	20130119	ENSEMBL			0.0199959	0.145406	2	0	5060	165	184	1	1	1	0	0	1	1
GRM7	0.0367657	0.0367657	0.0367657	2.54033	0.484407	0.484407	0.484407	3.79087	4.84407e-07	3.79087	0.531212	0.595272	1	1	4.84407e-07	3.79087	0.531212	0.595272	1	1	UniProtKB	Q14831, C9JMT3, H7C3K2, C9JU97	GRM7		0007268 // synaptic transmission (GO_REF:0000019 [IEA] Ensembl:ENSMUSP00000133957) /// 0007194 // negative regulation of adenylate cyclase activity (PMID:9144652 [IDA]) /// 0030818 // negative regulation of cAMP biosynthetic process (PMID:9473604 [IDA]) /// 0030534 // adult behavior (GO_REF:0000019 [IEA] Ensembl:ENSMUSP00000133957) /// 0030818 // negative regulation of cAMP biosynthetic process (…	0005886 // plasma membrane (GO_REF:0000040 [IEA] UniProtKB-SubCell:SL-0039) /// 0005886 // plasma membrane (Reactome:REACT_18380 [TAS]) /// 0030424 // axon (GO_REF:0000024 [ISS] UniProtKB:P35400) /// 0005887 // integral to plasma membrane (PMID:9473604 [NAS]) /// 0016021 // integral to membrane (GO_REF:0000002 [IEA] InterPro:IPR000162) /// 0030425 // dendrite (PMID:9630572 [IDA]) /// 0043198 // d…	0070905 // serine binding (PMID:9144652 [IDA]) /// 0010855 // adenylate cyclase inhibitor activity (PMID:9473604 [IDA]) /// 0010855 // adenylate cyclase inhibitor activity (PMID:9144652 [IDA]) /// 0016595 // glutamate binding (PMID:9144652 [IDA]) /// 0005509 // calcium ion binding (PMID:18599484 [IDA]) /// 0008066 // glutamate receptor activity (PMID:9473604 [IDA]) /// 0005245 // voltage-gated ca…	Metabotropic glutamate receptor 7	C9JMT3_HUMAN|GRM7	protein	taxon:9606	20130119	InterPro			0.0238687	0.173568	2	0	4239	620	749	1	1	1	0	0	0	0
HSF5	0.0379473	0.0379473	0.0379473	2.54033	0.499976	0.499976	0.499976	3.79087	4.99976e-07	3.79087	0.539681	0.589417	1	1	4.99976e-07	3.79087	0.539681	0.589417	1	1	UniProtKB	Q4G112	HSF5		0006351 // transcription, DNA-dependent (GO_REF:0000037 [IEA] UniProtKB-KW:KW-0804)	0005634 // nucleus (GO_REF:0000039 [IEA] UniProtKB-SubCell:SL-0191)	0003700 // transcription factor activity (GO_REF:0000002 [IEA] InterPro:IPR000232) /// 0043565 // sequence-specific DNA binding (GO_REF:0000002 [IEA] InterPro:IPR000232)	Heat shock factor protein 5	HSF5_HUMAN|HSTF5|HSF5	protein	taxon:9606	20130119	InterPro			0.0246358	0.179147	1	1	4107	123	146	1	1	1	0	0	0	0
IFITM10	0.0420193	0.0420193	0.0420193	2.54033	0.553626	0.553626	0.553626	3.79087	5.53626e-07	3.79087	0.567899	0.570103	1	1	5.53626e-07	3.79087	0.567899	0.570104	1	1	UniProtKB	A6NMD0	IFITM10		0009607 // response to biotic stimulus (GO_REF:0000002 [IEA] InterPro:IPR007593)	0005886 // plasma membrane (GO_REF:0000039 [IEA] UniProtKB-SubCell:SL-0039) /// 0016021 // integral to membrane (GO_REF:0000037 [IEA] UniProtKB-KW:KW-0812)		Interferon-induced transmembrane protein 10	IFM10_HUMAN|IFITM10	protein	taxon:9606	20130119	UniProtKB			0.0272794	0.19837	1	1	3709	15	15	1	1	1	0	0	0	0
IL33	0.0575941	0.0575941	0.0575941	2.54033	0.758832	0.758832	0.758832	3.79087	7.58832e-07	3.79087	0.664868	0.506135	1	1	7.58832e-07	3.79087	0.664869	0.506135	1	1	UniProtKB	B4DJ35, O95760	IL33		0051025 // negative regulation of immunoglobulin secretion (GO_REF:0000019 [IEA] Ensembl:ENSMUSP00000113829) /// 0050729 // positive regulation of inflammatory response (PMID:19841166 [ISS] UniProtKB:Q8BVZ5) /// 0006351 // transcription, DNA-dependent (GO_REF:0000037 [IEA] UniProtKB-KW:KW-0804) /// 0032755 // positive regulation of interleukin-6 production (GO_REF:0000019 [IEA] Ensembl:ENSMUSP000…	0030133 // transport vesicle (GO_REF:0000039 [IEA] UniProtKB-SubCell:SL-0244) /// 0005615 // extracellular space (GO_REF:0000037 [IEA] UniProtKB-KW:KW-0202) /// 0005634 // nucleus (GO_REF:0000039 [IEA] UniProtKB-SubCell:SL-0191) /// 0005694 // chromosome (GO_REF:0000039 [IEA] UniProtKB-SubCell:SL-0468)	0005515 // protein binding (PMID:16286016 [IPI] UniProtKB:Q01638) /// 0005125 // cytokine activity (PMID:19841166 [IDA]) /// 0005125 // cytokine activity (GO_REF:0000002 [IEA] InterPro:IPR026145)	Interleukin-33	B4DJ35_HUMAN|IL33	protein	taxon:9606	20130119	InterPro			0.0373908	0.271898	3	0	2706	30	31	1	1	1	0	0	1	1
KLRG1	0.0870182	0.0870182	0.0870182	2.54033	1.14651	1.14651	1.14651	3.79087	1.14651e-06	3.79087	0.817244	0.413789	1	1	1.14651e-06	3.79087	0.817244	0.413789	1	1	UniProtKB	F5H8E3, F5H207, Q96E93	KLRG1		0050776 // regulation of immune response (Reactome:REACT_11152 [TAS]) /// 0045087 // innate immune response (GO_REF:0000037 [IEA] UniProtKB-KW:KW-0399) /// 0007166 // cell surface receptor linked signal transduction (PMID:9842918 [TAS]) /// 0006954 // inflammatory response (PMID:9842918 [TAS]) /// 0006968 // cellular defense response (PMID:9842918 [TAS])	0005886 // plasma membrane (GO_REF:0000039 [IEA] UniProtKB-SubCell:SL-0039) /// 0016021 // integral to membrane (GO_REF:0000037 [IEA] UniProtKB-KW:KW-0812)	0004872 // receptor activity (PMID:9765598 [TAS]) /// 0030246 // carbohydrate binding (GO_REF:0000002 [IEA] InterPro:IPR001304)	Killer cell lectin-like receptor subfamily G member 1	F5H207_HUMAN|KLRG1	protein	taxon:9606	20130119	InterPro			0.0564932	0.410807	1	1	1791	20	21	1	1	1	0	0	0	0
PIWIL4	0.0487182	0.0487182	0.0487182	2.54033	0.641888	0.641888	0.641888	3.79087	6.41888e-07	3.79087	0.611494	0.540872	1	1	6.41888e-07	3.79087	0.611494	0.540872	1	1	UniProtKB	Q7Z3Z4, F5H116, F5GX26	PIWIL4		0030154 // cell differentiation (GO_REF:0000037 [IEA] UniProtKB-KW:KW-0221) /// 0006417 // regulation of translation (GO_REF:0000037 [IEA] UniProtKB-KW:KW-0810) /// 0031047 // gene silencing by RNA (GO_REF:0000024 [ISS] UniProtKB:Q8CGT6) /// 0043046 // DNA methylation during gametogenesis (GO_REF:0000024 [ISS] UniProtKB:Q8CGT6) /// 0043046 // DNA methylation during gametogenesis (GO_REF:0000019 […	0043186 // P granule (GO_REF:0000024 [ISS] UniProtKB:Q8CGT6) /// 0005634 // nucleus (GO_REF:0000019 [IEA] Ensembl:ENSMUSP00000076213) /// 0005634 // nucleus (GO_REF:0000024 [ISS] UniProtKB:Q8CGT6) /// 0071547 /// 0005737 // cytoplasm (GO_REF:0000024 [ISS] UniProtKB:Q8CGT6)	0034584 // piRNA binding (GO_REF:0000019 [IEA] Ensembl:ENSMUSP00000076213) /// 0003676 // nucleic acid binding (GO_REF:0000002 [IEA] InterPro:IPR012337) /// 0034584 // piRNA binding (GO_REF:0000024 [ISS] UniProtKB:Q8CGT6)	Piwi-like protein 4	F5GX26_HUMAN|PIWIL4	protein	taxon:9606	20130119	ENSEMBL			0.0316284	0.229995	1	1	3199	17	19	1	1	1	0	0	0	0
PLA1A	0.087556	0.087556	0.087556	2.54033	1.1536	1.1536	1.1536	3.79087	1.1536e-06	3.79087	0.819766	0.41235	1	1	1.1536e-06	3.79087	0.819766	0.41235	1	1	UniProtKB	Q53H76, H7C4H1, G5E9W0	PLA1A		0006629 // lipid metabolic process (GO_REF:0000002 [IEA] InterPro:IPR000734) /// 0006658 // phosphatidylserine metabolic process (PMID:10196188 [TAS]) /// 0006629 // lipid metabolic process (PMID:10196188 [TAS]) /// 0016042 // lipid catabolic process (GO_REF:0000037 [IEA] UniProtKB-KW:KW-0442)	0005576 // extracellular region (GO_REF:0000038 [IEA] UniProtKB-KW:KW-0964) /// 0005576 // extracellular region (GO_REF:0000039 [IEA] UniProtKB-SubCell:SL-0243)	0008970 // phospholipase A1 activity (PMID:10196188 [TAS]) /// 0016787 // hydrolase activity (GO_REF:0000038 [IEA] UniProtKB-KW:KW-0378)	Phospholipase A1 member A, isoform CRA_b	G5E9W0_HUMAN|hCG_22568|PLA1A	protein	taxon:9606	20130119	UniProtKB			0.0568424	0.413346	3	0	1780	11	11	1	1	1	0	0	0	0
RIMBP2	0.024652	0.024652	0.024652	2.54033	0.324802	0.324802	0.324802	3.79087	3.24802e-07	3.79087	0.434983	0.663575	1	1	3.24802e-07	3.79087	0.434983	0.663575	1	1	UniProtKB	O15034	RIMBP2		0010923 // negative regulation of phosphatase activity (PMID:19389623 [IDA])	0045202 // synapse (GO_REF:0000039 [IEA] UniProtKB-SubCell:SL-0258) /// 0030054 // cell junction (GO_REF:0000037 [IEA] UniProtKB-KW:KW-0965) /// 0005886 // plasma membrane (GO_REF:0000039 [IEA] UniProtKB-SubCell:SL-0039)		RIMS-binding protein 2	RIMB2_HUMAN|KIAA0318|RIMBP2|RBP2	protein	taxon:9606	20130119	UniProtKB			0.0160043	0.11638	1	0	6322	54	55	1	1	1	0	0	1	1
SHISA3	0.0790714	0.0790714	0.0790714	2.54033	1.04181	1.04181	1.04181	3.79087	1.04181e-06	3.79087	0.779034	0.43596	1	1	1.04181e-06	3.79087	0.779034	0.43596	1	1	UniProtKB	A0PJX4	SHISA3		0007275 // multicellular organismal development (GO_REF:0000037 [IEA] UniProtKB-KW:KW-0217)	0005789 // endoplasmic reticulum membrane (GO_REF:0000039 [IEA] UniProtKB-SubCell:SL-0097) /// 0016021 // integral to membrane (GO_REF:0000037 [IEA] UniProtKB-KW:KW-0812)		Protein shisa-3 homolog	SHSA3_HUMAN|SHISA3	protein	taxon:9606	20130119	UniProtKB			0.051334	0.37329	1	1	1971	4	4	1	1	1	0	0	0	0
SNX31	0.0634309	0.0634309	0.0634309	2.54033	0.835735	0.835735	0.835735	3.79087	8.35735e-07	3.79087	0.697746	0.485336	1	1	8.35735e-07	3.79087	0.697746	0.485336	1	1	UniProtKB	Q8N9S9, E5RJK2, E5RFI8	SNX31		0007154 // cell communication (GO_REF:0000002 [IEA] InterPro:IPR001683) /// 0015031 // protein transport (GO_REF:0000037 [IEA] UniProtKB-KW:KW-0653)	0005856 // cytoskeleton (GO_REF:0000002 [IEA] InterPro:IPR000299)	0035091 // phosphoinositide binding (GO_REF:0000002 [IEA] InterPro:IPR001683)	Sorting nexin-31	E5RFI8_HUMAN|SNX31	protein	taxon:9606	20130119	InterPro			0.0411801	0.299453	1	1	2457	202	225	1	1	1	0	0	0	0
TAS2R50 (NW_003571050 184618..185618)	0.15585	0.15585	0.15585	2.54033	2.0534	2.0534	2.0534	3.79087	2.0534e-06	3.79087	1.0937	0.274085	1	1	2.0534e-06	3.79087	1.0937	0.274085	1	1																0.101179	0.735755	1	1	1000	0	1	0	1	0	0	0	0	0
UBAP1L	0.338069	0.338069	0.338069	2.54033	4.45423	4.45423	4.45423	3.79087	4.45423e-06	3.79087	1.61083	0.107217	1	1	4.45423e-06	3.79087	1.61083	0.107217	1	1																0.219478	1.596	1	1	1383	40	40	3	3	1	1	1	2	2
ZNRD1 (NT_167246 1327632..1331278)	0.362863	0.362863	0.362863	2.54033	4.78091	4.78091	4.78091	3.79087	4.78091e-06	3.79087	1.66886	0.095146	1	1	4.78091e-06	3.79087	1.66886	0.0951459	1	1																0.235575	1.71305	2	1	859	0	4	0	2	0	0	0	0	0
SOCS7 (NW_003315948 135390..189231)	0.692518	0.692518	0.692518	2.51681	9.14924	9.14924	9.14924	3.75577	9.14924e-06	3.75577	2.30253	0.0213052	0.535449	1	9.14924e-06	3.75577	2.30253	0.0213052	0.535449	1																0.456563	3.32003	1	1	7978	3	77	0	36	0	0	2	0	1
ERRFI1	33.7553	33.7553	33.7553	2.50851	446.398	446.398	446.398	3.7434	0.000446398	3.7434	16.0711	0	0	0	0.000446398	3.7434	16.0721	0	0	0	UniProtKB	Q9UJM3	ERRFI1		0045616 // regulation of keratinocyte differentiation (GO_REF:0000024 [ISS] UniProtKB:Q99JZ7) /// 0006950 // response to stress (PMID:10749885 [TAS]) /// 0060428 // lung epithelium development (GO_REF:0000024 [ISS] UniProtKB:Q99JZ7) /// 0031953 // negative regulation of protein amino acid autophosphorylation (PMID:18046415 [IDA]) /// 0043589 // skin morphogenesis (GO_REF:0000024 [ISS] UniProtKB:Q…	0005737 // cytoplasm (GO_REF:0000024 [ISS] UniProtKB:Q99JZ7) /// 0031234 // extrinsic to internal side of plasma membrane (GO_REF:0000024 [ISS] UniProtKB:Q99JZ7) /// 0005737 // cytoplasm (PMID:18029348 [IDA]) /// 0005634 // nucleus (GO_REF:0000039 [IEA] UniProtKB-SubCell:SL-0191)	0005515 // protein binding (PMID:20936779 [IPI] UniProtKB:P62993) /// 0005515 // protein binding (PMID:21988832 [IPI] UniProtKB:P62993) /// 0019901 // protein kinase binding (PMID:18046415 [IPI] UniProtKB:P00533) /// 0005515 // protein binding (PMID:21706016 [IPI] UniProtKB:P62993) /// 0005100 // Rho GTPase activator activity (PMID:10749885 [TAS]) /// 0005515 // protein binding (PMID:20946980 [IP…	ERBB receptor feedback inhibitor 1	ERRFI_HUMAN|MIG6|ERRFI1	protein	taxon:9606	20030904	PINC			22.3765	162.717	1	1	3129	826	827	692	692	1	42	42	6	6
PPP1R18 (NT_113891 2156238..2167745)	0.693013	0.693013	0.693013	2.50001	9.1741	9.1741	9.1741	3.7307	9.1741e-06	3.7307	2.30122	0.0213793	0.536022	1	9.1741e-06	3.7307	2.30122	0.0213793	0.536021	1																0.462006	3.35961	2	1	4599	1	26	1	21	0.047619	1	1	0	0
EDN2	1.43566	1.43566	1.43566	2.46977	19.0757	19.0757	19.0757	3.68557	1.90757e-05	3.68557	3.30659	0.000944378	0.0590873	1	1.90757e-05	3.68557	3.3066	0.00094437	0.0590867	1	UniProtKB	P20800	EDN2		0042116 // macrophage activation (PMID:12207323 [IDA]) /// 0048246 // macrophage chemotaxis (PMID:12207323 [IDA]) /// 0010460 // positive regulation of heart rate (PMID:2649896 [IDA]) /// 0003100 // regulation of systemic arterial blood pressure by endothelin (PMID:2649896 [IDA]) /// 0045987 // positive regulation of smooth muscle contraction (GO_REF:0000019 [IEA] Ensembl:ENSMUSP00000030384) /// …	0005576 // extracellular region (Reactome:REACT_15291 [TAS]) /// 0005576 // extracellular region (Reactome:REACT_22436 [TAS]) /// 0005576 // extracellular region (Reactome:REACT_22263 [TAS]) /// 0005615 // extracellular space (PMID:15691296 [IDA]) /// 0005576 // extracellular region (Reactome:REACT_17040 [TAS])	0005179 // hormone activity (PMID:2649896 [IDA])	Endothelin-2	EDN2_HUMAN|EDN2	protein	taxon:9606	20090430	BHF-UCL			0.976792	7.10302	1	1	1243	14	14	12	12	1	0	0	1	1
HES1	3.13094	3.13094	3.13094	2.45838	41.6607	41.6607	41.6607	3.66859	4.16607e-05	3.66859	4.87999	1.06091e-06	0.000167957	0.0443406	4.16607e-05	3.66859	4.88002	1.06086e-06	0.000167949	0.0443386	UniProtKB	Q14469	HES1		0001701 // in utero embryonic development (GO_REF:0000019 [IEA] Ensembl:ENSMUSP00000023171) /// 0031018 // endocrine pancreas development (Reactome:REACT_13673 [TAS]) /// 0042102 // positive regulation of T cell proliferation (GO_REF:0000019 [IEA] Ensembl:ENSMUSP00000023171) /// 0072012 /// 0003143 /// 0031018 // endocrine pancreas development (Reactome:REACT_13698 [TAS]) /// 0016477 // cell migr…	0005737 // cytoplasm (GO_REF:0000019 [IEA] Ensembl:ENSMUSP00000023171) /// 0005634 // nucleus (GO_REF:0000024 [ISS] UniProtKB:P35428)	0042803 // protein homodimerization activity (GO_REF:0000024 [ISS] UniProtKB:P35428) /// 0071820 /// 0001078 /// 0042826 // histone deacetylase binding (PMID:12535671 [IPI] UniProtKB:Q96EB6) /// 0008134 // transcription factor binding (PMID:17611704 [NAS]) /// 0003700 // transcription factor activity (PMID:17681138 [IDA]) /// 0043565 // sequence-specific DNA binding (GO_REF:0000024 [ISS] UniProtK…	Transcription factor HES-1	HES1_HUMAN|HES1|BHLHB39|HL|HRY	protein	taxon:9606	20110802	UniProtKB			2.14686	15.6115	1	1	1461	34	34	31	31	1	4	4	4	4
TRIM36	0.807627	0.807627	0.807627	2.44624	10.763	10.763	10.763	3.65047	1.0763e-05	3.65047	2.47675	0.0132585	0.38887	1	1.0763e-05	3.65047	2.47675	0.0132585	0.388869	1	UniProtKB	E9PFI8, D6RAU9, E9PBG3, Q9NQ86	TRIM36		0007340 // acrosome reaction (GO_REF:0000019 [IEA] Ensembl:ENSMUSP00000037978)	0005622 // intracellular (GO_REF:0000002 [IEA] InterPro:IPR000315) /// 0001669 // acrosomal vesicle (GO_REF:0000039 [IEA] UniProtKB-SubCell:SL-0007) /// 0001669 // acrosomal vesicle (GO_REF:0000019 [IEA] Ensembl:ENSMUSP00000037978) /// 0005856 // cytoskeleton (GO_REF:0000039 [IEA] UniProtKB-SubCell:SL-0090)	0008270 // zinc ion binding (GO_REF:0000002 [IEA] InterPro:IPR000315) /// 0046872 // metal ion binding (GO_REF:0000037 [IEA] UniProtKB-KW:KW-0479) /// 0016874 // ligase activity (GO_REF:0000037 [IEA] UniProtKB-KW:KW-0436) /// 0008270 // zinc ion binding (GO_REF:0000002 [IEA] InterPro:IPR001841) /// 0008270 // zinc ion binding (GO_REF:0000002 [IEA] InterPro:IPR000315|InterPro:IPR001841) /// 004687…	E3 ubiquitin-protein ligase TRIM36	D6RAU9_HUMAN|TRIM36	protein	taxon:9606	20130119	InterPro			0.558431	4.06079	3	2	4892	110	114	27	27	1	3	3	0	0
ANKRD37	3.47092	3.47092	3.47092	2.39306	46.5839	46.5839	46.5839	3.57111	4.65839e-05	3.57111	5.1189	3.07329e-07	5.41975e-05	0.0128448	4.65839e-05	3.57111	5.11893	3.07312e-07	5.41945e-05	0.0128441	UniProtKB	D6RFF5, Q7Z713	ANKRD37			0005737 // cytoplasm (GO_REF:0000019 [IEA] Ensembl:ENSMUSP00000056828) /// 0005634 // nucleus (GO_REF:0000039 [IEA] UniProtKB-SubCell:SL-0191) /// 0005634 // nucleus (GO_REF:0000019 [IEA] Ensembl:ENSMUSP00000056828) /// 0005737 // cytoplasm (GO_REF:0000039 [IEA] UniProtKB-SubCell:SL-0086)		Ankyrin repeat domain-containing protein 37	D6RFF5_HUMAN|ANKRD37	protein	taxon:9606	20130119	ENSEMBL			2.49157	18.1182	1	1	934	23	32	15	23	0.652174	11	11	1	1
FBXO48	0.255083	0.255083	0.255083	2.37097	3.43409	3.43409	3.43409	3.53815	3.43409e-06	3.53815	1.38588	0.165784	1	1	3.43409e-06	3.53815	1.38588	0.165784	1	1																0.18606	1.35299	1	1	2719	34	35	5	5	1	1	1	0	0
MICA (NT_167248 2664816..2676634)	1.01622	1.01622	1.01622	2.37097	13.681	13.681	13.681	3.53815	1.3681e-05	3.53815	2.76618	0.00567169	0.21533	1	1.3681e-05	3.53815	2.76619	0.00567167	0.215329	1																0.741241	5.39015	1	1	1365	2	16	1	10	0.1	0	6	1	2
RNF32	0.330587	0.330587	0.330587	2.37097	4.45056	4.45056	4.45056	3.53815	4.45056e-06	3.53815	1.57771	0.114632	1	1	4.45056e-06	3.53815	1.57771	0.114632	1	1	UniProtKB	E9PES2, G5E940, Q9H0A6	RNF32			0016235 // aggresome (PMID:11890671 [IDA]) /// 0005768 // endosome (PMID:11256614 [IDA])	0005515 // protein binding (PMID:21163940 [IPI] UniProtKB:Q96FJ0) /// 0046872 // metal ion binding (GO_REF:0000037 [IEA] UniProtKB-KW:KW-0479) /// 0008270 // zinc ion binding (GO_REF:0000002 [IEA] InterPro:IPR001841) /// 0005515 // protein binding (PMID:21163940 [IPI] UniProtKB:Q96QH2) /// 0046872 // metal ion binding (GO_REF:0000038 [IEA] UniProtKB-KW:KW-0479) /// 0005515 // protein binding (PMI…	RING finger protein 32	E9PES2_HUMAN|RNF32	protein	taxon:9606	20130119	InterPro			0.241133	1.75347	3	0	2098	84	84	5	5	1	0	0	4	4
DDIT4	46.8422	46.8422	46.8422	2.37012	630.694	630.694	630.694	3.53687	0.000630694	3.53687	18.7846	0	0	0	0.000630694	3.53687	18.7863	0	0	0	UniProtKB	Q9NX09	DDIT4		0033137 // negative regulation of peptidyl-serine phosphorylation (GO_REF:0000024 [ISS] UniProtKB:Q8VHZ9) /// 0072593 /// 0043241 // protein complex disassembly (GO_REF:0000019 [IEA] Ensembl:ENSMUSP00000020308) /// 0045820 // negative regulation of glycolysis (GO_REF:0000019 [IEA] Ensembl:ENSMUSP00000020308) /// 0001764 // neuron migration (GO_REF:0000024 [ISS] UniProtKB:Q8VHZ9) /// 0010741 // ne…	0005739 // mitochondrion (GO_REF:0000039 [IEA] UniProtKB-SubCell:SL-0173) /// 0005737 // cytoplasm (PMID:18029348 [IDA]) /// 0005622 // intracellular (PMID:11256614 [IDA]) /// 0005829 // cytosol (GO_REF:0000039 [IEA] UniProtKB-SubCell:SL-0091) /// 0005737 // cytoplasm (PMID:12453409 [IDA])	71889	DNA damage-inducible transcript 4 protein	DDIT4_HUMAN|REDD1|DDIT4|RTP801	protein	taxon:9606	20121002	UniProtKB			34.1885	248.611	1	1	1752	595	595	592	592	1	65	65	10	10
POLG2 (NT_010783 27748053..27767336)	1.20757	1.20757	1.20757	2.35888	16.2851	16.2851	16.2851	3.5201	1.62851e-05	3.5201	3.01324	0.00258478	0.125036	1	1.62851e-05	3.5201	3.01324	0.00258477	0.125035	1																0.888652	6.46209	1	1	1594	0	65	0	14	0	0	5	0	2
POU3F1	0.604172	0.604172	0.604172	2.34492	8.16429	8.16429	8.16429	3.49927	8.16429e-06	3.49927	2.12959	0.0332053	0.701272	1	8.16429e-06	3.49927	2.12959	0.0332053	0.701271	1	UniProtKB	Q03052	POU3F1		0030900 // forebrain development (GO_REF:0000019 [IEA] Ensembl:ENSMUSP00000137374) /// 0045893 // positive regulation of transcription, DNA-dependent (GO_REF:0000024 [ISS] UniProtKB:P21952) /// 0030216 // keratinocyte differentiation (GO_REF:0000019 [IEA] Ensembl:ENSMUSP00000137374) /// 0022011 // myelination in the peripheral nervous system (GO_REF:0000019 [IEA] Ensembl:ENSMUSP00000137374) /// 0…	0005667 // transcription factor complex (GO_REF:0000019 [IEA] Ensembl:ENSMUSP00000137374) /// 0005634 // nucleus (GO_REF:0000024 [ISS] UniProtKB:P21952)	0043565 // sequence-specific DNA binding (PMID:9242494 [IDA]) /// 0003700 // transcription factor activity (GO_REF:0000002 [IEA] InterPro:IPR000327|InterPro:IPR001356) /// 0001105	POU domain, class 3, transcription factor 1	PO3F1_HUMAN|POU3F1|OCT6|OTF6	protein	taxon:9606	20130119	ENSEMBL			0.449226	3.26667	1	1	2928	13	13	13	13	1	0	0	0	0
CXCL14	0.272264	0.272264	0.272264	2.32864	3.68804	3.68804	3.68804	3.47497	3.68804e-06	3.47497	1.4282	0.153235	1	1	3.68804e-06	3.47497	1.4282	0.153235	1	1	UniProtKB	O95715	CXCL14		0048839 // inner ear development (GO_REF:0000019 [IEA] Ensembl:ENSMUSP00000021970) /// 0006935 // chemotaxis (GO_REF:0000037 [IEA] UniProtKB-KW:KW-0145) /// 0007165 // signal transduction (PMID:10049774 [TAS]) /// 0006955 // immune response (GO_REF:0000002 [IEA] InterPro:IPR001811) /// 0007267 // cell-cell signaling (PMID:10049774 [TAS])	0005794 // Golgi apparatus (PMID:11256614 [IDA]) /// 0005615 // extracellular space (GO_REF:0000037 [IEA] UniProtKB-KW:KW-0202)	0008009 // chemokine activity (GO_REF:0000002 [IEA] InterPro:IPR001811)	C-X-C motif chemokine 14	CXL14_HUMAN|PSEC0212|CXCL14|MIP2G|NJAC|UNQ240/PRO273|SCYB14	protein	taxon:9606	20130119	UniProtKB			0.20492	1.49014	1	1	1975	7	7	4	4	1	0	0	0	0
FAM101B (NT_024972 289768..295731)	0.14846	0.14846	0.14846	2.32864	2.01101	2.01101	2.01101	3.47497	2.01101e-06	3.47497	1.05462	0.291598	1	1	2.01101e-06	3.47497	1.05462	0.291598	1	1																0.111739	0.81254	1	1	3622	0	6	0	4	0	0	0	0	0
HYDIN	0.0325774	0.0325774	0.0325774	2.32864	0.441287	0.441287	0.441287	3.47497	4.41287e-07	3.47497	0.494027	0.621287	1	1	4.41287e-07	3.47497	0.494027	0.621287	1	1	UniProtKB	H0YF91	HYDIN				0005198 // structural molecule activity (GO_REF:0000002 [IEA] InterPro:IPR000535)	Hydrocephalus-inducing protein homolog	H0YF91_HUMAN|HYDIN	protein	taxon:9606	20130119	InterPro			0.0245194	0.1783	4	1	16506	158	311	2	4	0.5	1	1	0	0
LPHN2	0.094238	0.094238	0.094238	2.32864	1.27653	1.27653	1.27653	3.47497	1.27653e-06	3.47497	0.840244	0.400771	1	1	1.27653e-06	3.47497	0.840245	0.400771	1	1	UniProtKB	B1ALU1, H0Y3V3, B1ALU3, O95490, H0Y5C0	LPHN2		0007218 // neuropeptide signaling pathway (GO_REF:0000002 [IEA] InterPro:IPR000203) /// 0007186 // G-protein coupled receptor protein signaling pathway (PMID:10030676 [NAS]) /// 0007420 // brain development (GO_REF:0000019 [IEA] Ensembl:ENSRNOP00000042136)	0005886 // plasma membrane (GO_REF:0000040 [IEA] UniProtKB-SubCell:SL-0039) /// 0016021 // integral to membrane (PMID:10030676 [NAS]) /// 0005886 // plasma membrane (GO_REF:0000039 [IEA] UniProtKB-SubCell:SL-0039) /// 0016021 // integral to membrane (GO_REF:0000038 [IEA] UniProtKB-KW:KW-0812) /// 0016021 // integral to membrane (GO_REF:0000002 [IEA] InterPro:IPR000832)	0004930 // G-protein coupled receptor activity (GO_REF:0000037 [IEA] UniProtKB-KW:KW-0297) /// 0030165 // PDZ domain binding (GO_REF:0000019 [IEA] Ensembl:ENSRNOP00000042136) /// 0004930 // G-protein coupled receptor activity (GO_REF:0000038 [IEA] UniProtKB-KW:KW-0297) /// 0004930 // G-protein coupled receptor activity (GO_REF:0000002 [IEA] InterPro:IPR000832|InterPro:IPR003334|InterPro:IPR017983…	Latrophilin 2	B1ALU1_HUMAN|RP11-563M18.1-005|LPHN2	protein	taxon:9606	20130119	UniProtKB			0.0709284	0.515776	1	1	5706	229	237	4	4	1	0	0	0	0
SYCP3	0.476282	0.476282	0.476282	2.32864	6.45162	6.45162	6.45162	3.47497	6.45162e-06	3.47497	1.88897	0.0588956	0.985404	1	6.45162e-06	3.47497	1.88897	0.0588955	0.985404	1	UniProtKB	Q8IZU3	SYCP3		0051301 // cell division (GO_REF:0000037 [IEA] UniProtKB-KW:KW-0132) /// 0035093 // spermatogenesis, exchange of chromosomal proteins (PMID:14643120 [IMP]) /// 0007141 // male meiosis I (PMID:15218256 [NAS])	0005634 // nucleus (GO_REF:0000039 [IEA] UniProtKB-SubCell:SL-0191) /// 0005694 // chromosome (GO_REF:0000039 [IEA] UniProtKB-SubCell:SL-0468)	0003677 // DNA binding (GO_REF:0000037 [IEA] UniProtKB-KW:KW-0238)	Synaptonemal complex protein 3	SYCP3_HUMAN|SCP3|SYCP3	protein	taxon:9606	20130119	UniProtKB			0.358474	2.60675	3	0	1129	21	22	3	4	0.75	0	0	1	1
FLOT1 (NT_167244 2007152..2009922)	1.40826	1.40826	1.40826	2.29839	19.1644	19.1644	19.1644	3.42984	1.91644e-05	3.42984	3.24225	0.00118591	0.0706053	1	1.91644e-05	3.42984	3.24226	0.00118589	0.0706047	1																1.08462	7.88711	1	1	653	0	7	0	7	0	0	2	0	0
ANHX	0.216358	0.216358	0.216358	2.25807	2.96345	2.96345	2.96345	3.36967	2.96345e-06	3.36967	1.26771	0.204903	1	1	2.96345e-06	3.36967	1.26771	0.204903	1	1	UniProtKB	E9PGG2	ANHX			0005634 // nucleus (GO_REF:0000039 [IEA] UniProtKB-SubCell:SL-0191)	0043565 // sequence-specific DNA binding (GO_REF:0000002 [IEA] InterPro:IPR001356|InterPro:IPR017970) /// 0003700 // transcription factor activity (GO_REF:0000002 [IEA] InterPro:IPR001356)	Anomalous homeobox protein	ANHX_HUMAN|ANHX	protein	taxon:9606	20130119	InterPro			0.171976	1.25058	1	1	1765	12	12	3	3	1	0	0	0	0
NTRK3	0.0728904	0.0728904	0.0728904	2.25807	0.998374	0.998374	0.998374	3.36967	9.98374e-07	3.36967	0.735811	0.461846	1	1	9.98374e-07	3.36967	0.735811	0.461846	1	1	UniProtKB	B7Z7U4, E9PG56, Q16288, H0YMI9, H0YND1, H0YM90	NTRK3		0048691 // positive regulation of axon extension involved in regeneration (GO_REF:0000019 [IEA] Ensembl:ENSMUSP00000037909) /// 0051412 // response to corticosterone stimulus (GO_REF:0000019 [IEA] Ensembl:ENSRNOP00000046935) /// 0048712 // negative regulation of astrocyte differentiation (GO_REF:0000019 [IEA] Ensembl:ENSRNOP00000046935) /// 0019056 // modulation by virus of host transcription (GO…	0005887 // integral to plasma membrane (GO_REF:0000002 [IEA] InterPro:IPR020446|InterPro:IPR020777) /// 0005887 // integral to plasma membrane (GO_REF:0000002 [IEA] InterPro:IPR020446) /// 0000139 // Golgi membrane (GO_REF:0000019 [IEA] Ensembl:ENSRNOP00000046935)	0005030 // neurotrophin receptor activity (PMID:23027130 [IDA]) /// 0004714 // transmembrane receptor protein tyrosine kinase activity (GO_REF:0000002 [IEA] InterPro:IPR020446) /// 0004714 // transmembrane receptor protein tyrosine kinase activity (GO_REF:0000003 [IEA] EC:2.7.10.1) /// 0043121 // neurotrophin binding (PMID:7806211 [TAS]) /// 0005524 // ATP binding (GO_REF:0000037 [IEA] UniProtKB-…	Tyrosine-protein kinase receptor	B7Z7U4_HUMAN|NTRK3	protein	taxon:9606	20130119	UniProtKB			0.0579382	0.421314	4	0	5239	228	257	2	3	0.666667	0	0	2	3
TNFRSF6B	0.661251	0.661251	0.661251	2.25807	9.05711	9.05711	9.05711	3.36967	9.05711e-06	3.36967	2.21624	0.0266753	0.605921	1	9.05711e-06	3.36967	2.21624	0.0266753	0.60592	1	UniProtKB	O95407	TNFRSF6B		0043066 // negative regulation of apoptosis (PMID:9872321 [TAS]) /// 0006915 // apoptosis (GO_REF:0000037 [IEA] UniProtKB-KW:KW-0053)	0005615 // extracellular space (PMID:10318773 [NAS])	0005515 // protein binding (PMID:10318773 [IPI] UniProtKB:O43557) /// 0004872 // receptor activity (PMID:9872321 [TAS])	Tumor necrosis factor receptor superfamily member 6B	TNF6B_HUMAN|DCR3|UNQ186/PRO212|TNFRSF6B|TR6	protein	taxon:9606	20030904	PINC			0.525607	3.8221	1	1	1155	0	12	0	6	0	0	0	0	0
ZNF185 (NW_003871103 348424..407464)	0.0798062	0.0798062	0.0798062	2.25807	1.0931	1.0931	1.0931	3.36967	1.0931e-06	3.36967	0.769927	0.441343	1	1	1.0931e-06	3.36967	0.769927	0.441343	1	1																0.0634354	0.461288	8	0	4785	1	9	1	3	0.333333	1	1	0	0
ZNF730	0.189892	0.189892	0.189892	2.25807	2.60094	2.60094	2.60094	3.36967	2.60094e-06	3.36967	1.18764	0.234975	1	1	2.60094e-06	3.36967	1.18764	0.234975	1	1	UniProtKB	Q6ZMV8	ZNF730		0006355 // regulation of transcription, DNA-dependent (GO_REF:0000037 [IEA] UniProtKB-KW:KW-0805) /// 0006351 // transcription, DNA-dependent (GO_REF:0000037 [IEA] UniProtKB-KW:KW-0804)	0005634 // nucleus (GO_REF:0000039 [IEA] UniProtKB-SubCell:SL-0191)	0046872 // metal ion binding (GO_REF:0000037 [IEA] UniProtKB-KW:KW-0479) /// 0003677 // DNA binding (GO_REF:0000037 [IEA] UniProtKB-KW:KW-0238) /// 0008270 // zinc ion binding (GO_REF:0000002 [IEA] InterPro:IPR007087|InterPro:IPR015880)	Putative zinc finger protein 730	ZN730_HUMAN|ZNF730	protein	taxon:9606	20130119	UniProtKB			0.150939	1.0976	1	1	2011	29	41	3	3	1	0	0	0	0
CRABP1	0.494654	0.494654	0.494654	2.25807	6.77523	6.77523	6.77523	3.36967	6.77523e-06	3.36967	1.91683	0.0552599	0.952412	1	6.77523e-06	3.36967	1.91683	0.0552598	0.952411	1	UniProtKB	P29762	CRABP1		0007275 // multicellular organismal development (PMID:1309505 [TAS]) /// 0007165 // signal transduction (PMID:1309505 [TAS])	0005737 // cytoplasm (GO_REF:0000039 [IEA] UniProtKB-SubCell:SL-0086)	0019841 // retinol binding (GO_REF:0000037 [IEA] UniProtKB-KW:KW-0683) /// 0005501 // retinoid binding (PMID:1309505 [TAS]) /// 0016918 // retinal binding (GO_REF:0000037 [IEA] UniProtKB-KW:KW-0845) /// 0005215 // transporter activity (GO_REF:0000002 [IEA] InterPro:IPR000463)	Cellular retinoic acid-binding protein 1	RABP1_HUMAN|RBP5|CRABP1	protein	taxon:9606	20030904	PINC			0.393184	2.85915	1	1	772	10	10	3	3	1	1	1	0	0
FER1L5	0.0589583	0.0589583	0.0589583	2.25807	0.807547	0.807547	0.807547	3.36967	8.07547e-07	3.36967	0.661765	0.508122	1	1	8.07547e-07	3.36967	0.661765	0.508122	1	1	UniProtKB	A0AVI2	FER1L5			0016021 // integral to membrane (GO_REF:0000037 [IEA] UniProtKB-KW:KW-0812)		Fer-1-like protein 5	FR1L5_HUMAN|FER1L5	protein	taxon:9606	20130119	UniProtKB			0.046864	0.340785	1	1	6477	42	45	3	3	1	1	1	2	2
MUC6	0.0477162	0.0477162	0.0477162	2.25807	0.653565	0.653565	0.653565	3.36967	6.53565e-07	3.36967	0.595339	0.551617	1	1	6.53565e-07	3.36967	0.595339	0.551617	1	1	UniProtKB	Q6W4X9	MUC6		0043687 // post-translational protein modification (Reactome:REACT_22161 [TAS]) /// 0016266 // O-glycan processing (Reactome:REACT_115835 [TAS]) /// 0044267 // cellular protein metabolic process (Reactome:REACT_17015 [TAS]) /// 0030277 // maintenance of gastrointestinal epithelium (PMID:7680650 [NAS]) /// 0016266 // O-glycan processing (Reactome:REACT_115606 [TAS])	0005576 // extracellular region (GO_REF:0000029 [NAS]) /// 0005796 // Golgi lumen (Reactome:REACT_115586 [TAS]) /// 0005796 // Golgi lumen (Reactome:REACT_115891 [TAS]) /// 0005796 // Golgi lumen (Reactome:REACT_116000 [TAS]) /// 0005796 // Golgi lumen (Reactome:REACT_116107 [TAS]) /// 0005796 // Golgi lumen (Reactome:REACT_115905 [TAS]) /// 0005796 // Golgi lumen (Reactome:REACT_116089 [TAS]) //…	0005201 // extracellular matrix structural constituent (PMID:7680650 [NAS])	Mucin-6	MUC6_HUMAN|MUC6	protein	taxon:9606	20061106	UniProtKB			0.0379281	0.275805	1	1	8003	7	7	3	3	1	0	0	1	1
NLGN3	0.191655	0.191655	0.191655	2.25807	2.62508	2.62508	2.62508	3.36967	2.62508e-06	3.36967	1.19314	0.232814	1	1	2.62508e-06	3.36967	1.19314	0.232814	1	1	UniProtKB	Q9NZ94, E7EVK0, D3DVV1	NLGN3		0051968 // positive regulation of synaptic transmission, glutamatergic (GO_REF:0000024 [ISS] UniProtKB:Q8BYM5) /// 0060024 // rhythmic synaptic transmission (GO_REF:0000024 [ISS] UniProtKB:Q62889) /// 2000463 /// 0097104 /// 0060080 // regulation of inhibitory postsynaptic membrane potential (GO_REF:0000024 [ISS] UniProtKB:Q62889) /// 0006898 // receptor-mediated endocytosis (GO_REF:0000024 [ISS]…	0060076 // excitatory synapse (PMID:15620359 [IDA]) /// 0030054 // cell junction (GO_REF:0000037 [IEA] UniProtKB-KW:KW-0965) /// 0009986 // cell surface (PMID:17292328 [IDA]) /// 0016020 // membrane (GO_REF:0000002 [IEA] InterPro:IPR000460) /// 0005737 // cytoplasm (PMID:18029348 [IDA]) /// 0005887 // integral to plasma membrane (GO_REF:0000033 [IBA] PANTHER:PTN000168538) /// 0045202 // synapse (…	0004091 // carboxylesterase activity (GO_REF:0000033 [IKR] PANTHER:PTN000168538) /// 0042043 // neurexin binding (PMID:15152050 [ISS] UniProtKB:Q62889) /// 0050839 // cell adhesion molecule binding (PMID:15152050 [ISS] UniProtKB:Q62889) /// 0005515 // protein binding (PMID:17292328 [IPI] UniProtKB:Q9NY99) /// 0004872 // receptor activity (GO_REF:0000024 [ISS] UniProtKB:Q62889) /// 0004872 // rece…	Neuroligin 3, isoform CRA_c	D3DVV1_HUMAN|hCG_1724001|NLGN3	protein	taxon:9606	20080205	HPA			0.15234	1.10779	3	0	3985	30	32	6	6	1	1	1	0	0
REM2	0.205418	0.205418	0.205418	2.25807	2.8136	2.8136	2.8136	3.36967	2.8136e-06	3.36967	1.23524	0.216741	1	1	2.8136e-06	3.36967	1.23524	0.216741	1	1	UniProtKB	B7Z5P1, Q8IYK8	REM2		0007264 // small GTPase mediated signal transduction (GO_REF:0000002 [IEA] InterPro:IPR001806) /// 0007165 // signal transduction (GO_REF:0000002 [IEA] InterPro:IPR020849)	0016020 // membrane (GO_REF:0000002 [IEA] InterPro:IPR020849) /// 0005886 // plasma membrane (GO_REF:0000039 [IEA] UniProtKB-SubCell:SL-0039)	0005525 // GTP binding (GO_REF:0000002 [IEA] InterPro:IPR020849) /// 0003924 // GTPase activity (GO_REF:0000002 [IEA] InterPro:IPR020849) /// 0003924 // GTPase activity (GO_REF:0000019 [IEA] Ensembl:ENSRNOP00000016020) /// 0005525 // GTP binding (GO_REF:0000019 [IEA] Ensembl:ENSRNOP00000016020)	GTP-binding protein REM 2	B7Z5P1_HUMAN|REM2	protein	taxon:9606	20130119	InterPro			0.16328	1.18734	1	1	1859	6	6	3	3	1	0	0	0	0
REP15	0.33527	0.33527	0.33527	2.25807	4.59217	4.59217	4.59217	3.36967	4.59217e-06	3.36967	1.57808	0.114547	1	1	4.59217e-06	3.36967	1.57808	0.114547	1	1	UniProtKB	Q6BDI9	REP15			0031901 // early endosome membrane (GO_REF:0000039 [IEA] UniProtKB-SubCell:SL-0093)		Rab15 effector protein	REP15_HUMAN|REP15	protein	taxon:9606	20130119	UniProtKB			0.266495	1.9379	1	1	1139	3	3	3	3	1	0	0	0	0
ST6GAL2	0.0540284	0.0540284	0.0540284	2.25807	0.740023	0.740023	0.740023	3.36967	7.40023e-07	3.36967	0.633493	0.526411	1	1	7.40023e-07	3.36967	0.633494	0.526411	1	1	UniProtKB	H7BY52, C9JIK2, Q96JF0	ST6GAL2		0009311 // oligosaccharide metabolic process (PMID:12235148 [IDA]) /// 0006486 // protein amino acid glycosylation (GO_REF:0000002 [IEA] InterPro:IPR001675) /// 0040007 // growth (PMID:12235148 [NAS]) /// 0007275 // multicellular organismal development (PMID:12235148 [NAS])	0030173 // integral to Golgi membrane (GO_REF:0000002 [IEA] InterPro:IPR001675) /// 0016021 // integral to membrane (PMID:12235148 [NAS]) /// 0032580 // Golgi cisterna membrane (GO_REF:0000039 [IEA] UniProtKB-SubCell:SL-0136)	0008373 // sialyltransferase activity (GO_REF:0000019 [IEA] Ensembl:ENSMUSP00000084091) /// 0003835 // beta-galactoside alpha-2,6-sialyltransferase activity (PMID:12235148 [IDA]) /// 0008373 // sialyltransferase activity (GO_REF:0000002 [IEA] InterPro:IPR001675)	Beta-galactoside alpha-2,6-sialyltransferase 2	C9JIK2_HUMAN|ST6GAL2	protein	taxon:9606	20130119	ENSEMBL			0.0429454	0.31229	3	1	7068	46	47	3	3	1	0	0	0	0
UNC79	0.04508	0.04508	0.04508	2.25807	0.617457	0.617457	0.617457	3.36967	6.17457e-07	3.36967	0.578659	0.562819	1	1	6.17457e-07	3.36967	0.578659	0.562819	1	1	UniProtKB	Q9P2D8	UNC79			0016021 // integral to membrane (GO_REF:0000037 [IEA] UniProtKB-KW:KW-0812)		Protein unc-79 homolog	UNC79_HUMAN|KIAA1409|UNC79	protein	taxon:9606	20130119	UniProtKB			0.0358326	0.260567	1	1	8471	294	322	2	3	0.666667	0	0	1	2
ZNF681	0.0587768	0.0587768	0.0587768	2.25807	0.805061	0.805061	0.805061	3.36967	8.05061e-07	3.36967	0.660745	0.508776	1	1	8.05061e-07	3.36967	0.660745	0.508776	1	1	UniProtKB	E9PJB6, E9PSC0, Q96N22	ZNF681		0006355 // regulation of transcription, DNA-dependent (GO_REF:0000037 [IEA] UniProtKB-KW:KW-0805) /// 0006351 // transcription, DNA-dependent (GO_REF:0000037 [IEA] UniProtKB-KW:KW-0804)	0005634 // nucleus (GO_REF:0000039 [IEA] UniProtKB-SubCell:SL-0191) /// 0005622 // intracellular (GO_REF:0000002 [IEA] InterPro:IPR015880)	0046872 // metal ion binding (GO_REF:0000037 [IEA] UniProtKB-KW:KW-0479) /// 0003677 // DNA binding (GO_REF:0000037 [IEA] UniProtKB-KW:KW-0238) /// 0003676 // nucleic acid binding (GO_REF:0000002 [IEA] InterPro:IPR013087) /// 0008270 // zinc ion binding (GO_REF:0000002 [IEA] InterPro:IPR007087) /// 0008270 // zinc ion binding (GO_REF:0000002 [IEA] InterPro:IPR007087|InterPro:IPR015880)	Zinc finger protein 681	E9PJB6_HUMAN|ZNF681	protein	taxon:9606	20130119	InterPro			0.0467198	0.339736	1	1	6497	21	23	3	3	1	0	0	1	1
C22orf29	0.0575543	0.0575543	0.0575543	2.25807	0.788317	0.788317	0.788317	3.36967	7.88317e-07	3.36967	0.653838	0.513216	1	1	7.88317e-07	3.36967	0.653838	0.513216	1	1	UniProtKB	Q7L3V2	C22orf29		0006917 // induction of apoptosis (PMID:23055042 [IMP]) /// 0051881 // regulation of mitochondrial membrane potential (PMID:23055042 [IMP])	0005739 // mitochondrion (PMID:23055042 [IDA])	0005515 // protein binding (PMID:23055042 [IPI] UniProtKB:P21796)	Uncharacterized protein C22orf29	CV029_HUMAN|C22orf29	protein	taxon:9606	20121214	UniProtKB			0.045748	0.33267	1	1	6635	2	3	2	3	0.666667	2	2	0	0
CCDC168	0.0355727	0.0355727	0.0355727	2.25807	0.487236	0.487236	0.487236	3.36967	4.87236e-07	3.36967	0.514031	0.60723	1	1	4.87236e-07	3.36967	0.514031	0.60723	1	1																0.0282756	0.205614	1	1	21470	19	19	6	6	1	0	0	0	0
COL28A1	0.108641	0.108641	0.108641	2.25807	1.48805	1.48805	1.48805	3.36967	1.48805e-06	3.36967	0.898313	0.369018	1	1	1.48805e-06	3.36967	0.898314	0.369019	1	1	UniProtKB	Q2UY09, H7C3P2, H7BZU0	COL28A1		0030198 // extracellular matrix organization (Reactome:REACT_118779 [TAS]) /// 0007155 // cell adhesion (GO_REF:0000037 [IEA] UniProtKB-KW:KW-0130)	0005576 // extracellular region (Reactome:REACT_121366 [TAS]) /// 0005604 // basement membrane (GO_REF:0000019 [IEA] Ensembl:ENSMUSP00000111199) /// 0005788 // endoplasmic reticulum lumen (Reactome:REACT_121254 [TAS]) /// 0005788 // endoplasmic reticulum lumen (Reactome:REACT_121366 [TAS]) /// 0005788 // endoplasmic reticulum lumen (Reactome:REACT_120939 [TAS]) /// 0005604 // basement membrane (G…	0004867 // serine-type endopeptidase inhibitor activity (GO_REF:0000002 [IEA] InterPro:IPR002223) /// 0004867 // serine-type endopeptidase inhibitor activity (GO_REF:0000037 [IEA] UniProtKB-KW:KW-0722)	Collagen alpha-1(XXVIII) chain	H7BZU0_HUMAN|COL28A1	protein	taxon:9606	20130119	InterPro			0.0863551	0.627956	1	0	3515	106	112	3	3	1	0	0	3	3
FAM49A	0.0812149	0.0812149	0.0812149	2.25807	1.11239	1.11239	1.11239	3.36967	1.11239e-06	3.36967	0.776693	0.43734	1	1	1.11239e-06	3.36967	0.776693	0.43734	1	1	UniProtKB	Q9H0Q0	FAM49A			0005622 // intracellular (PMID:11256614 [IDA])		Protein FAM49A	FA49A_HUMAN|FAM49A	protein	taxon:9606	20100607	LIFEdb			0.0645551	0.469431	1	1	4702	51	54	3	3	1	0	0	0	0
LOC728026	0.568263	0.568263	0.568263	2.25807	7.78345	7.78345	7.78345	3.36967	7.78345e-06	3.36967	2.0545	0.0399268	0.787155	1	7.78345e-06	3.36967	2.05451	0.0399268	0.787154	1																0.451694	3.28462	1	1	672	0	3	0	3	0	0	0	0	0
SHISA2	0.132182	0.132182	0.132182	2.25807	1.81048	1.81048	1.81048	3.36967	1.81048e-06	3.36967	0.99087	0.321749	1	1	1.81048e-06	3.36967	0.990871	0.321749	1	1	UniProtKB	Q6UWI4	SHISA2		0007275 // multicellular organismal development (GO_REF:0000037 [IEA] UniProtKB-KW:KW-0217)	0005789 // endoplasmic reticulum membrane (GO_REF:0000039 [IEA] UniProtKB-SubCell:SL-0097) /// 0016021 // integral to membrane (GO_REF:0000037 [IEA] UniProtKB-KW:KW-0812)		Protein shisa-2 homolog	SHSA2_HUMAN|C13orf13|UNQ9166/PRO28631|SHISA2|TMEM46	protein	taxon:9606	20130119	UniProtKB			0.105067	0.764024	1	1	2889	3	3	3	3	1	0	0	0	0
[truncated: 38,745 more rows]
[truncated: 32 more columns]
